# Supplementary material for: Bacteria-Human Somatic Cell Lateral Gene Transfer Is Enriched in Cancer Samples
Source: PubMed Central journal article supplement (PMC3688693; doi:10.1371/journal.pcbi.1003107), 2013-06-20

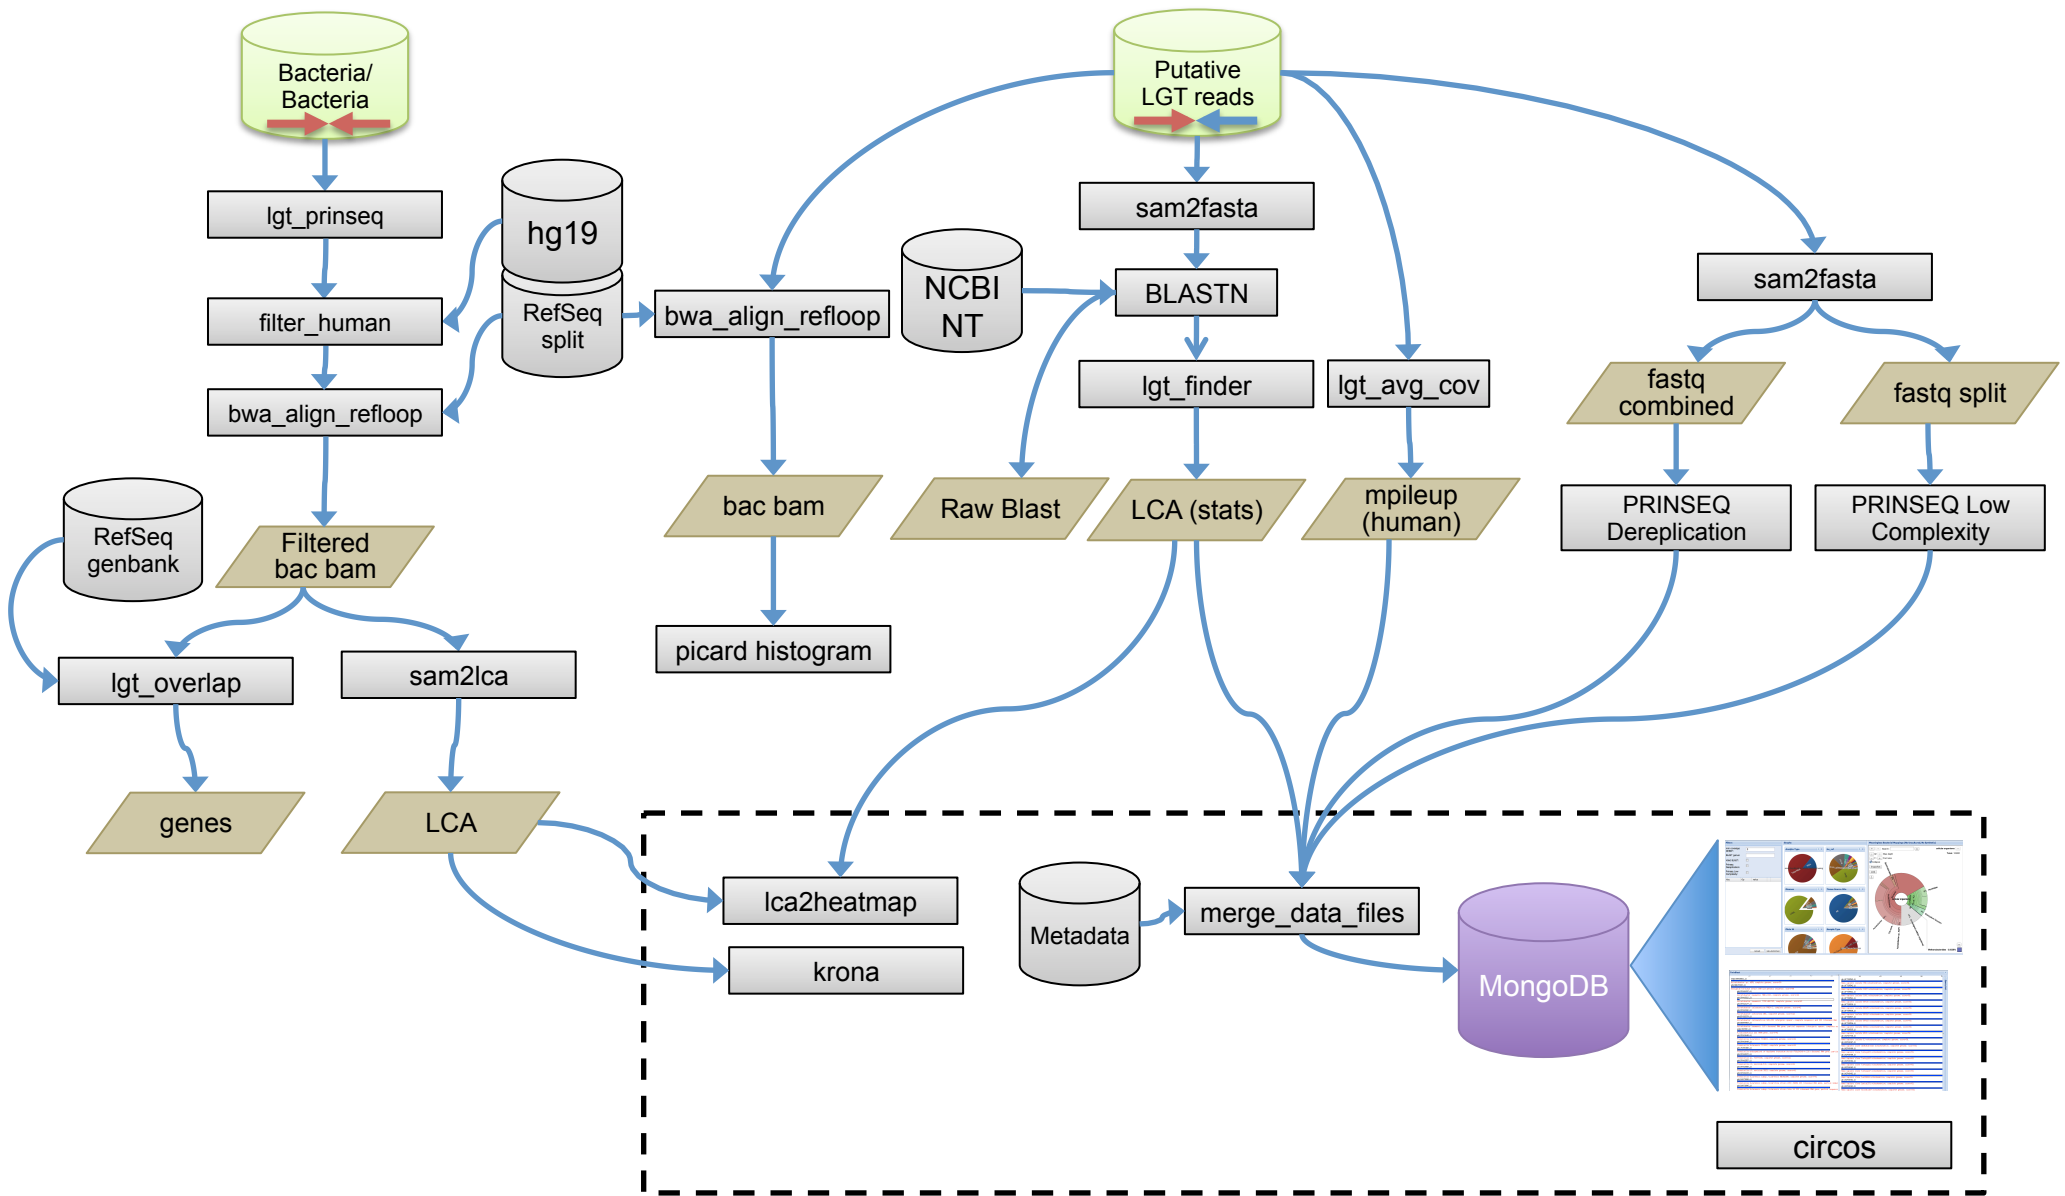

Supplement: pcbi.1003107.s001.pdf [file pcbi.1003107.s001.pdf]
