# Supplementary material for: Bacteria-Human Somatic Cell Lateral Gene Transfer Is Enriched in Cancer Samples
Source: PubMed Central journal article supplement (PMC3688693; doi:10.1371/journal.pcbi.1003107), 2013-06-20
Supplement: pcbi.1003107.s003.pdf [file pcbi.1003107.s003.pdf]

# A

BWA LCA: *Pseudomonas fluorescens* SBW25  
Blast LCA: *Pseudomonas fluorescens* SBW25

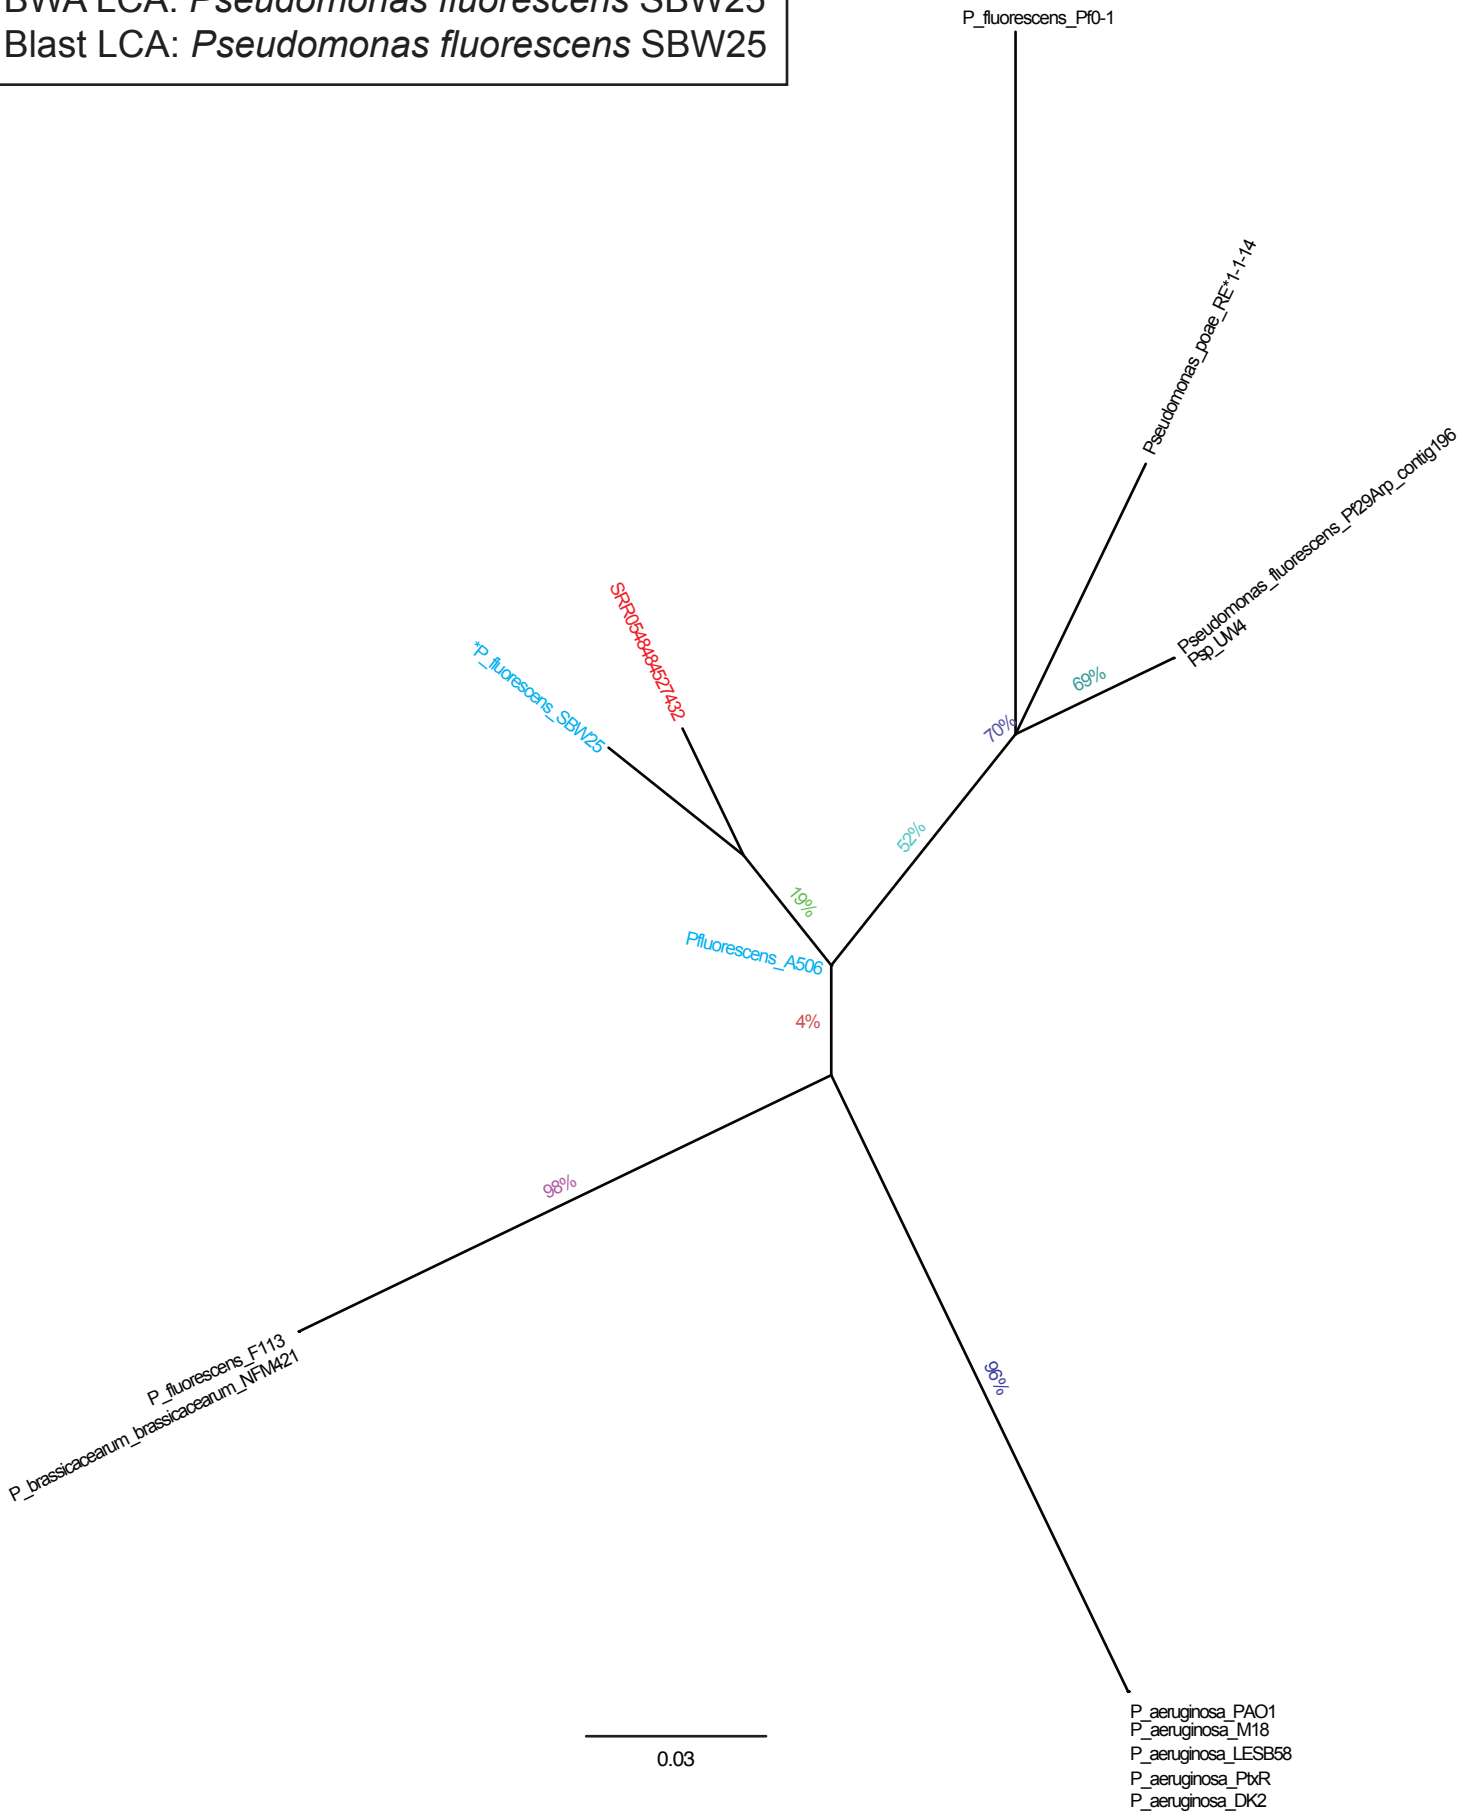

# B

BWA LCA: *Pseudomonas fluorescens* SBW25  
Blast LCA: *Pseudomonas fluorescens* SBW25

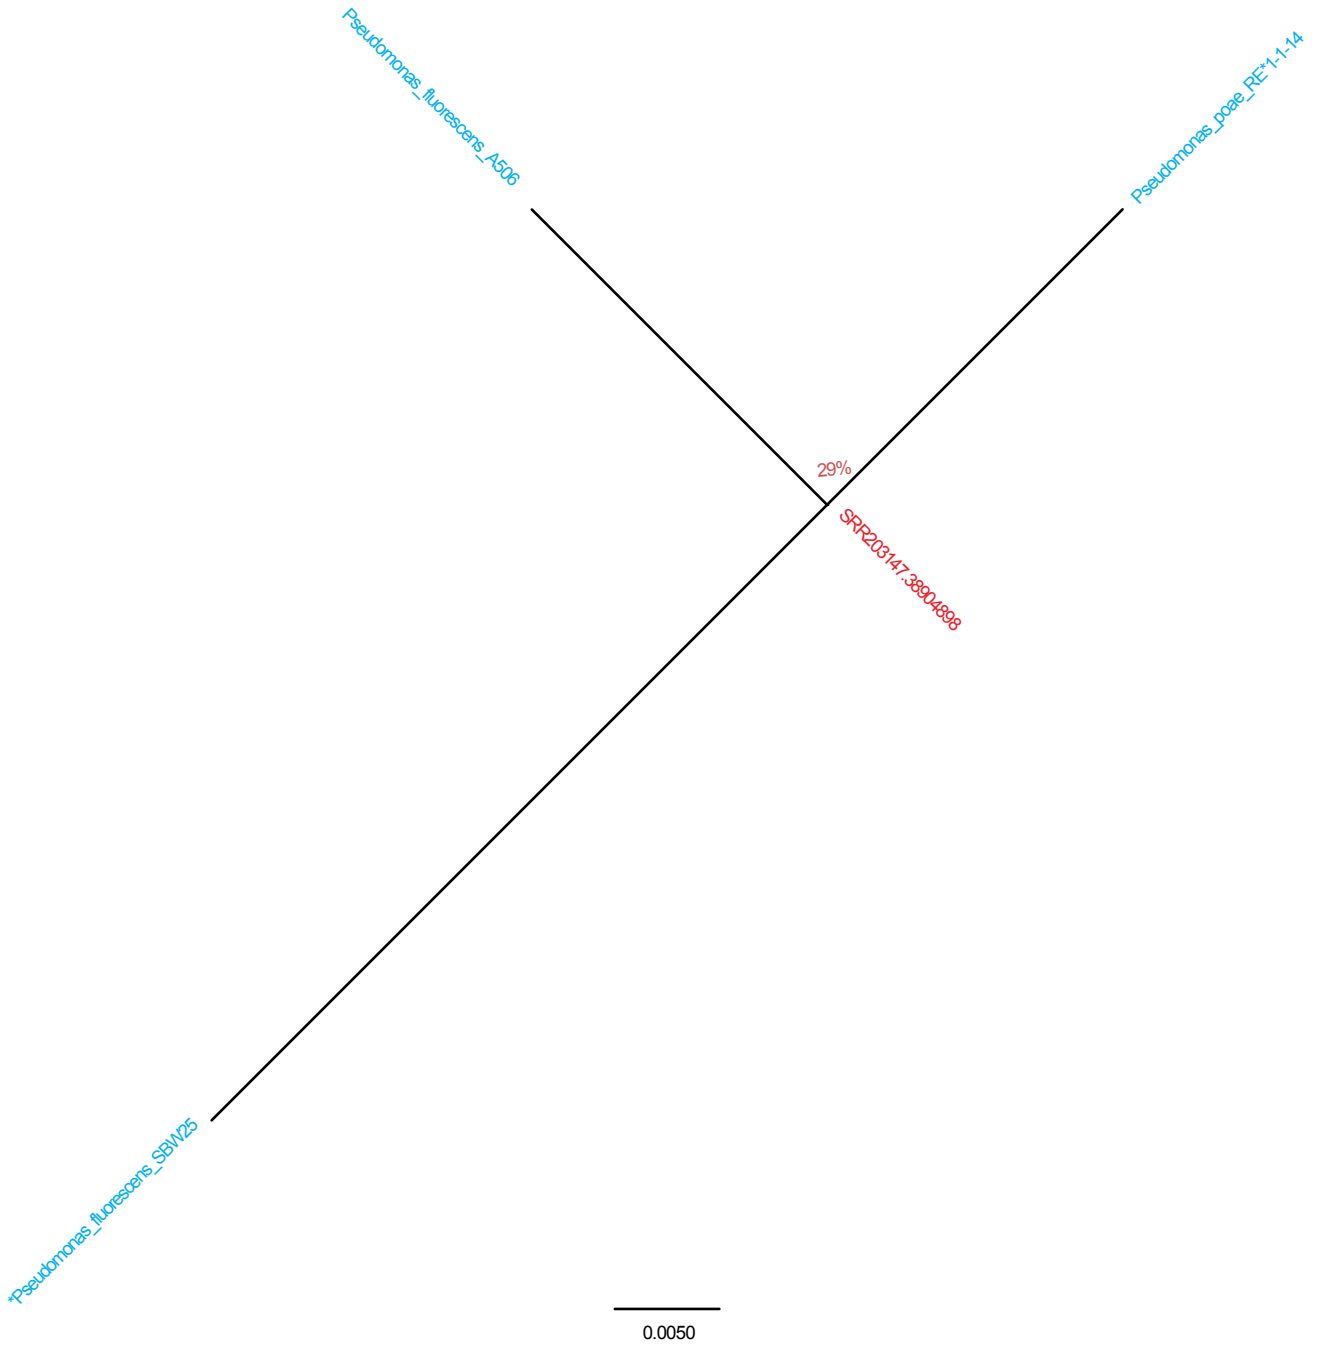

# C

BWA LCA: *Pseudomonas fluorescens*  
Blast LCA: *Pseudomonas fluorescens* SBW25

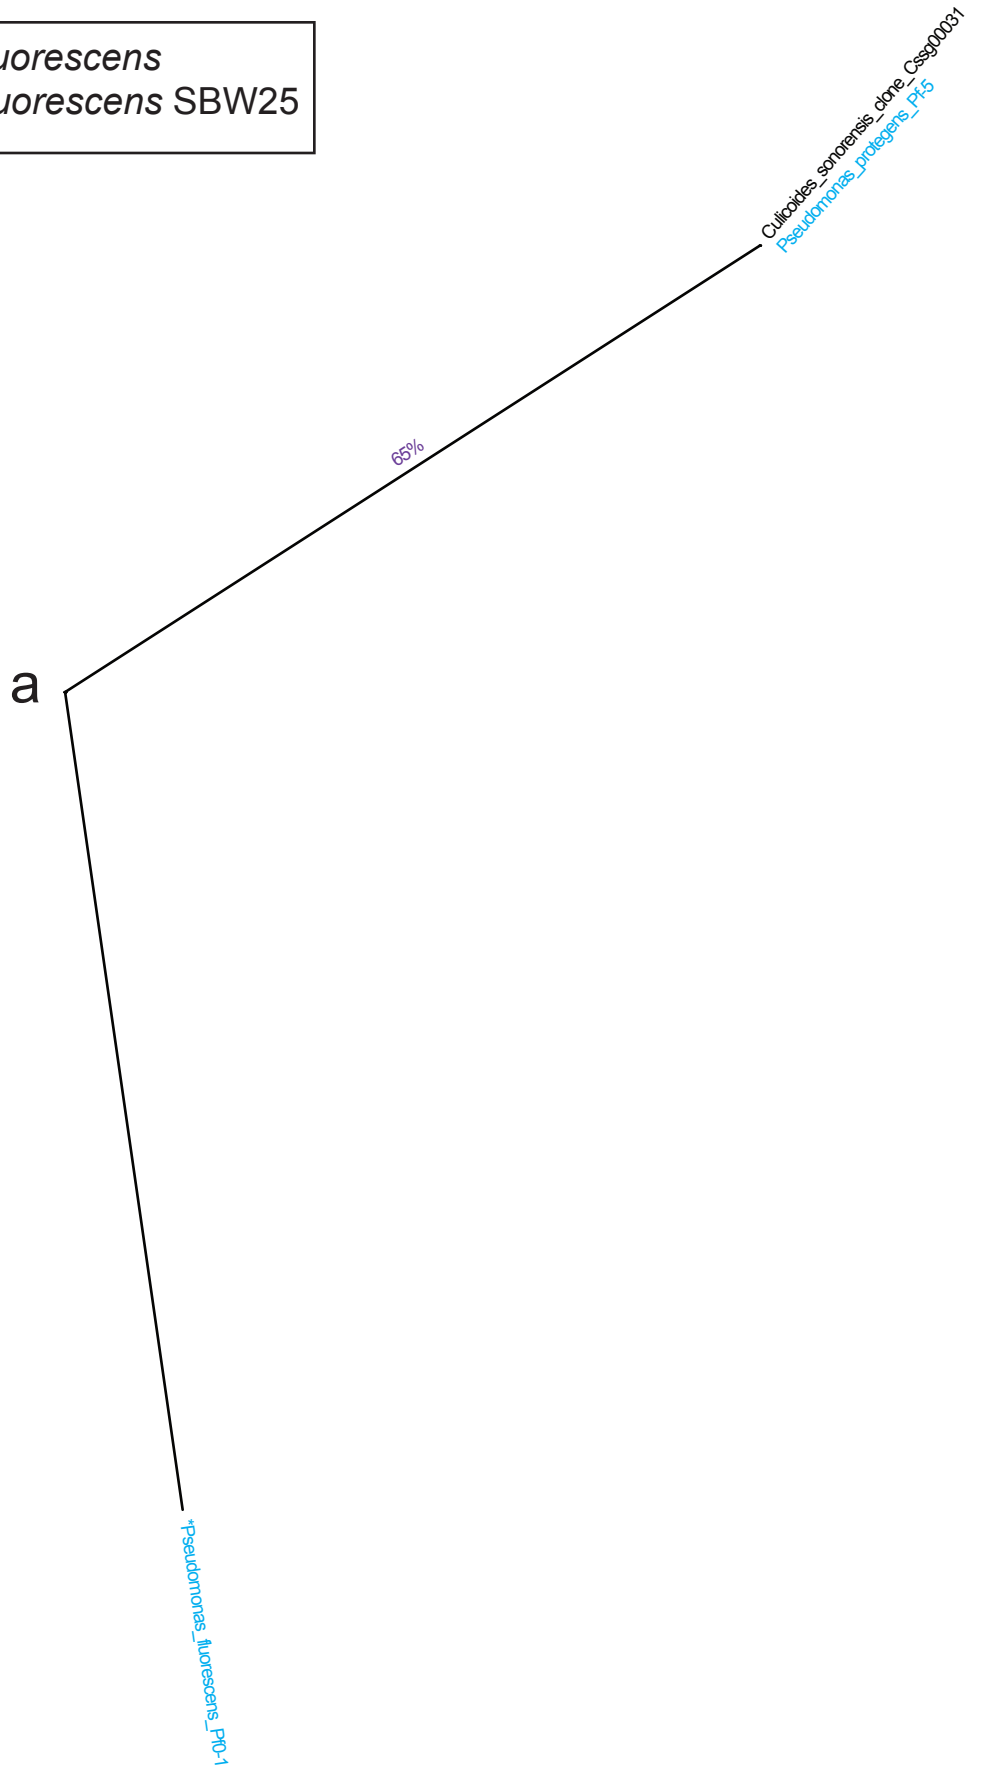

**a** Cottus\_gobio\_Bullhead\_contig\_24818 (fish)  
*Pseudomonas poae*\_RE\*1-1-14  
*\*Pseudomonas fluorescens*  
*Pseudomonas stutzeri*\_DSM\_10701  
*\*Pseudomonas fluorescens*\_SBW25  
*Pseudomonas*\_sp\_UW4  
SRR20315.825397602  
*\*Pseudomonas fluorescens*\_A506

0.0040

# D

BWA LCA: *Pseudomonas*  
Blast LCA: *Pseudomonas*

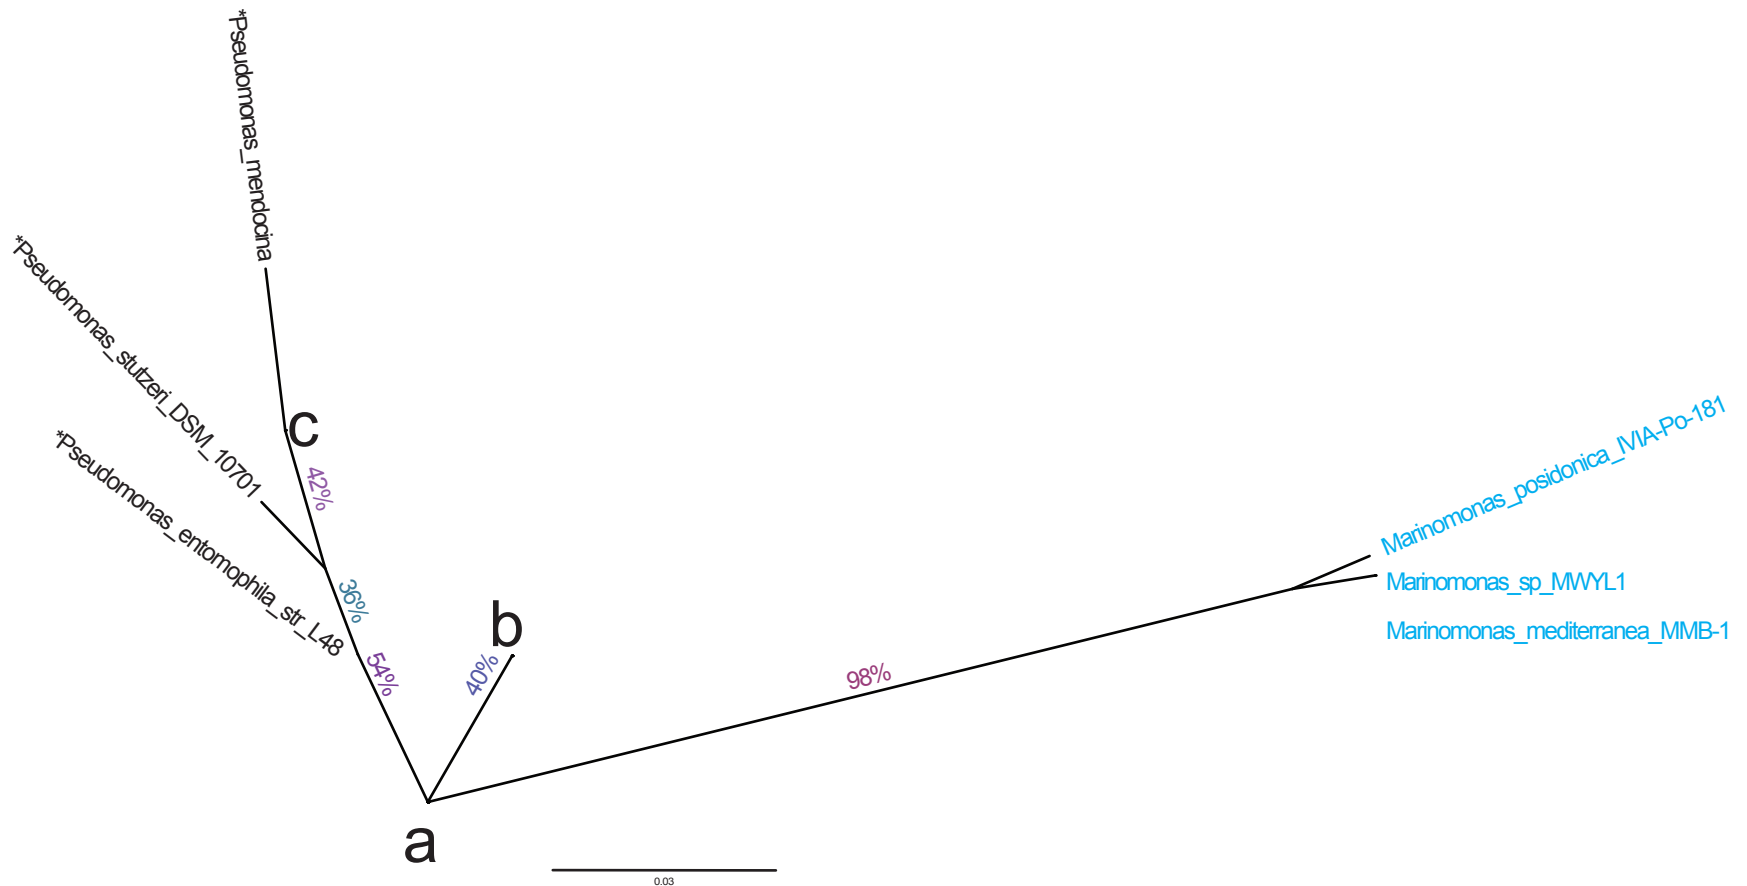

|          |                                                                                                                                                                                                                                                                                                                                                                                                                                                                                                                                                                                                                                                                                                                                                                                                                                                                                                                                                                                                                                                                                                               |          |                                                                                                                                                                                                                                                              |
|----------|---------------------------------------------------------------------------------------------------------------------------------------------------------------------------------------------------------------------------------------------------------------------------------------------------------------------------------------------------------------------------------------------------------------------------------------------------------------------------------------------------------------------------------------------------------------------------------------------------------------------------------------------------------------------------------------------------------------------------------------------------------------------------------------------------------------------------------------------------------------------------------------------------------------------------------------------------------------------------------------------------------------------------------------------------------------------------------------------------------------|----------|--------------------------------------------------------------------------------------------------------------------------------------------------------------------------------------------------------------------------------------------------------------|
| <b>a</b> | <ul style="list-style-type: none"><li>*<i>Pseudomonas_syringae_pv_syringae_B728a</i></li><li>*<i>Pseudomonas_syringae_pv_syringae_strain_UMAF0158</i></li><li>*<i>Pseudomonas_putida_GB-1</i></li><li>*<i>Pseudomonas_putida_W619</i></li><li>*<i>Pseudomonas_fluorescens_SBW25</i></li><li>*<i>Pseudomonas_fluorescens_Pf0-1</i></li><li>*<i>Pseudomonas_putida_BIRD-1</i></li><li>*<i>Pseudomonas_putida_S16</i></li><li>*<i>Pseudomonas_fluorescens_F113</i></li><li>*<i>Pseudomonas_fluorescens_A506</i></li><li>*<i>Pseudomonas_putida_ND6</i></li><li>*<i>Pseudomonas_putida_DOT-T1E</i></li><li>*<i>Pseudomonas_sp_UW4</i></li><li>*<i>Pseudomonas_putida_HB3267</i></li><li>*<i>Pseudomonas_poaie_RE-1-1-14</i></li><li>*<i>Pseudomonas_fluorescens_Pf29Arp</i></li><li>*<i>Pseudomonas_putida_KT2440</i></li><li>*<i>Pseudomonas_syringae_pv_tomato_str_DC3000</i></li><li>*<i>Pseudomonas_syringae_pv_phaseolicola_1448A</i></li><li>*<i>Pseudomonas_protegens_Pf-5</i></li><li>*<i>Pseudomonas_putida_F1</i></li><li>*<i>Pseudomonas_brassicacearum_NFM421</i></li><li>SRR06183721207268</li></ul> | <b>b</b> | <ul style="list-style-type: none"><li>*<i>Pseudomonas_perfectomarina</i></li><li>*<i>Pseudomonas_stutzeri</i></li><li>*<i>Pseudomonas_stutzeri_A1501</i></li><li>*<i>Pseudomonas_stutzeri_CCUG_29243</i></li><li>*<i>Pseudomonas_stutzeri_RCH2</i></li></ul> |
|          |                                                                                                                                                                                                                                                                                                                                                                                                                                                                                                                                                                                                                                                                                                                                                                                                                                                                                                                                                                                                                                                                                                               | <b>c</b> | <ul style="list-style-type: none"><li>*<i>Pseudomonas_stutzeri_DSM_4166</i></li><li>*<i>Pseudomonas_mendocina_NK-01</i></li><li>*<i>Pseudomonas_stutzeri_ATCC_17588</i></li><li>*<i>Pseudomonas_fulva_12-X</i></li></ul>                                     |

# E

BWA LCA: *Pseudomonas*  
Blast LCA: *Pseudomonas*

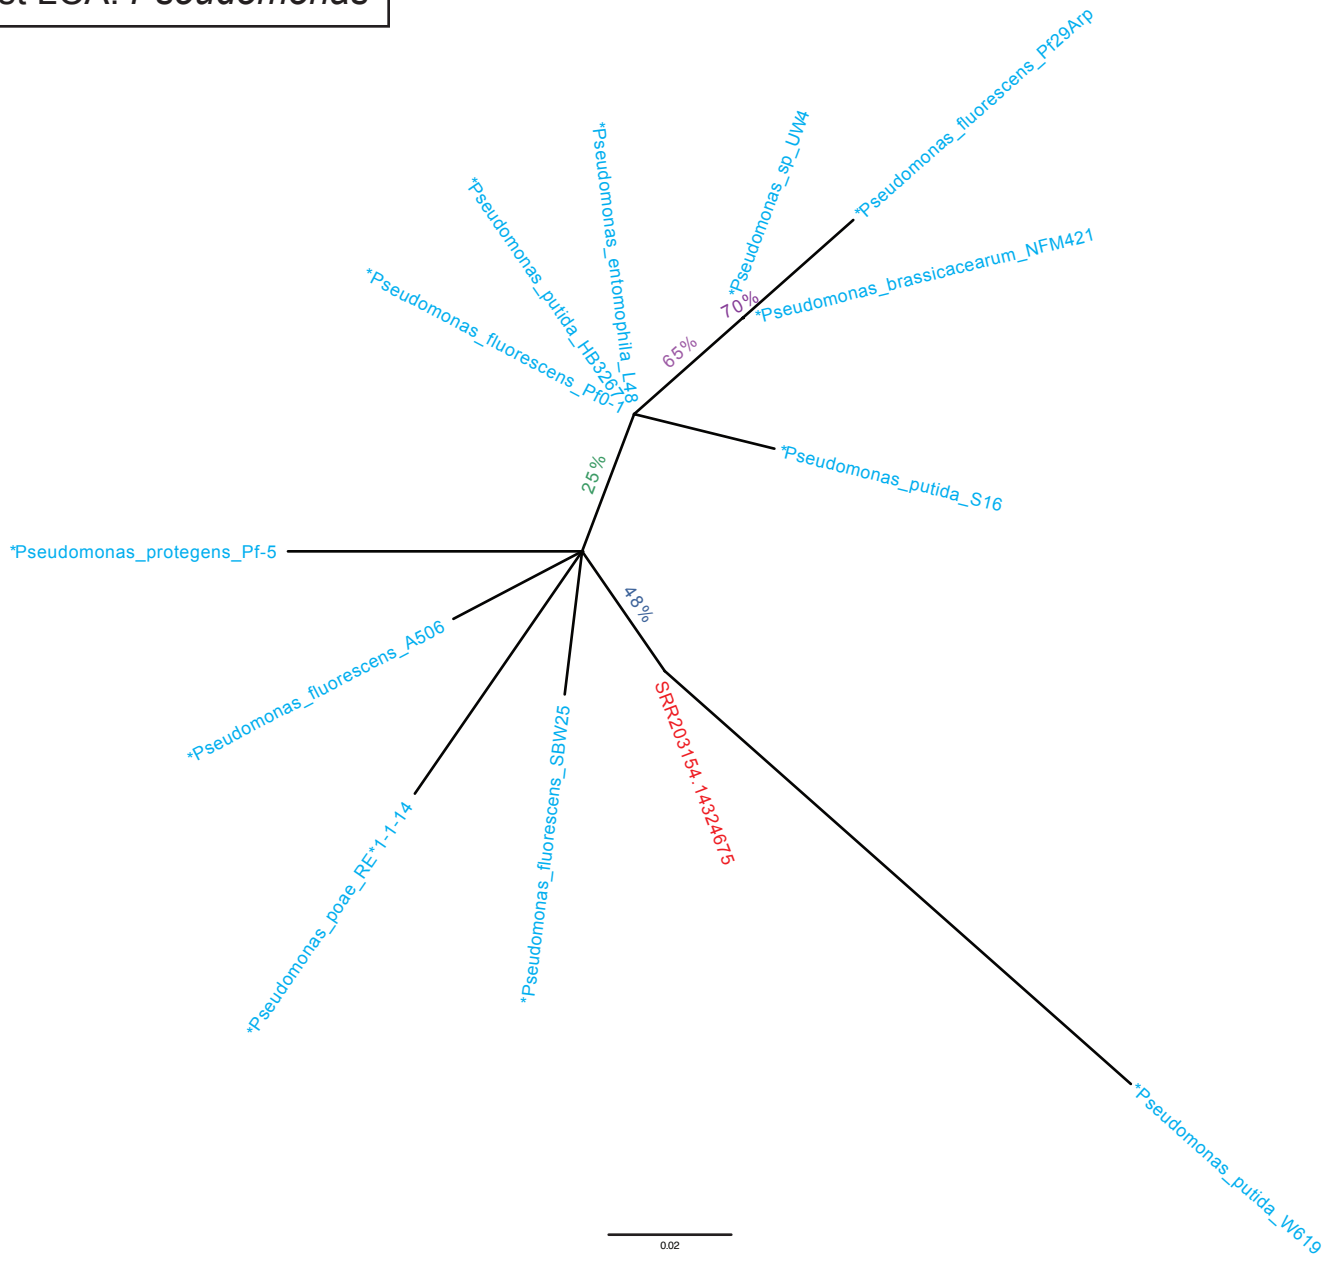

# F

BWA LCA: *Pseudomonas*  
Blast LCA: *Pseudomonas*

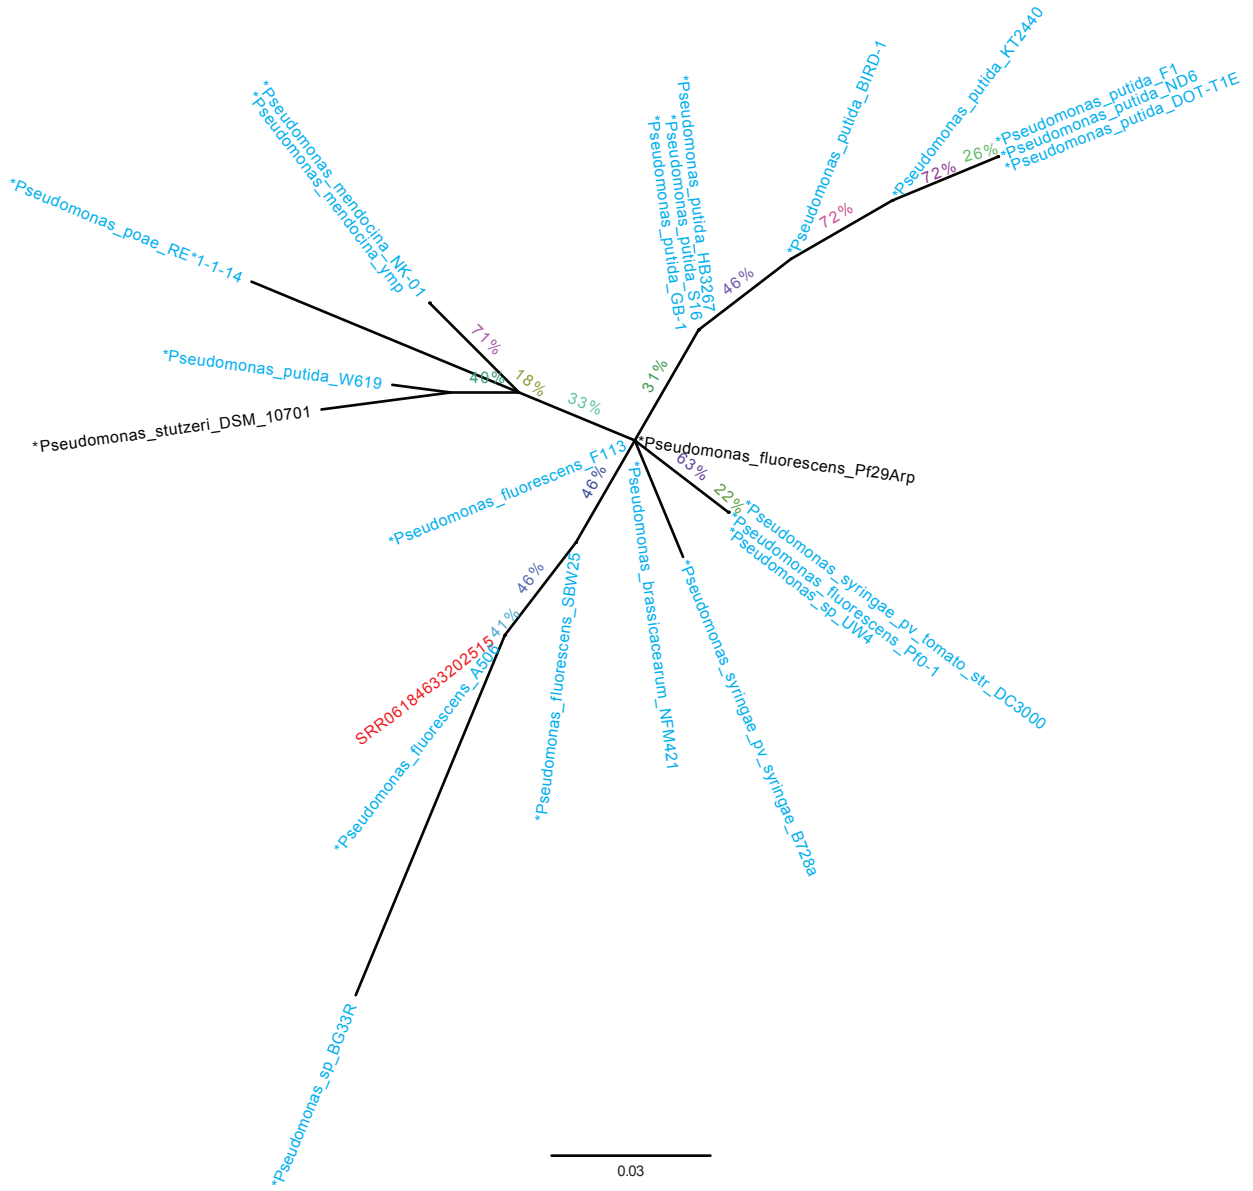

# G

BWA LCA: Pseudomonadaceae  
 Blast LCA: *Pseudomonas*

**a**

- \*Pseudomonas\_aeruginosa\_23S
- \*Pseudomonas\_fluorescens\_rmB
- \*Pseudomonas\_fluorescens\_rrnC
- \*Pseudomonas\_syringae\_pv\_tomato\_DC3000
- \*Pseudomonas\_aeruginosa\_DSM\_50071T
- \*Pseudomonas\_syringae\_pv\_phaseolicola
- \*Pseudomonas\_syringae\_pv\_syringae
- \*Pseudomonas\_aeruginosa\_PAO1
- \*Pseudomonas\_aeruginosa\_UCBPP-PA14
- \*Pseudomonas\_aeruginosa\_PA7
- \*Pseudomonas\_aeruginosa\_LESB58
- \*Pseudomonas\_fluorescens\_SBW25
- \*Pseudomonas\_aeruginosa\_DB3
- \*Pseudomonas\_brassicacearum
- \*Pseudomonas\_aeruginosa\_NCGM2\_S1
- \*Pseudomonas\_fluorescens\_F113
- \*Pseudomonas\_fluorescens\_A506
- Spodoptera\_exigua\_comp1146\_c0\_seq1 (moth)
- \*Pseudomonas\_brassicacearum\_NFM421
- SRR203141.1048355
- \*Pseudomonas\_syringae\_pv\_tomato
- \*Pseudomonas\_poaе\_RE\*1-1-14
- \*Pseudomonas\_aeruginosa\_M18
- \*Pseudomonas\_aeruginosa\_DK2
- \*Pseudomonas\_fluorescens\_Pf29Arp
- \*Pseudomonas\_aeruginosa\_B136-33

**b**

- \*Pseudomonas\_perfectomarina\_23S
- \*P\_stutzeri\_23S\_rRNA\_gene
- \*Pseudomonas\_stutzeri
- \*Pseudomonas\_stutzeri\_A1501-1
- \*Pseudomonas\_stutzeri\_DSM\_4166
- \*Pseudomonas\_stutzeri\_ATCC\_17588
- \*Pseudomonas\_stutzeri\_CCUG\_29243
- \*Pseudomonas\_stutzeri\_RCH2
- \*Pseudomonas\_stutzeri\_A1501

**c**

- \*Pseudomonas\_putida\_KT2440
- Rubrobacter\_radiotolerans\_23S
- \*Pseudomonas\_entomophila\_L48
- \*Pseudomonas\_putida\_F1
- \*Pseudomonas\_putida\_W619
- \*Pseudomonas\_putida\_BIRD-1
- \*Pseudomonas\_putida\_S16
- \*Pseudomonas\_putida\_ND6
- \*Pseudomonas\_putida\_DOT-T1E
- \*Pseudomonas\_putida\_HB3267

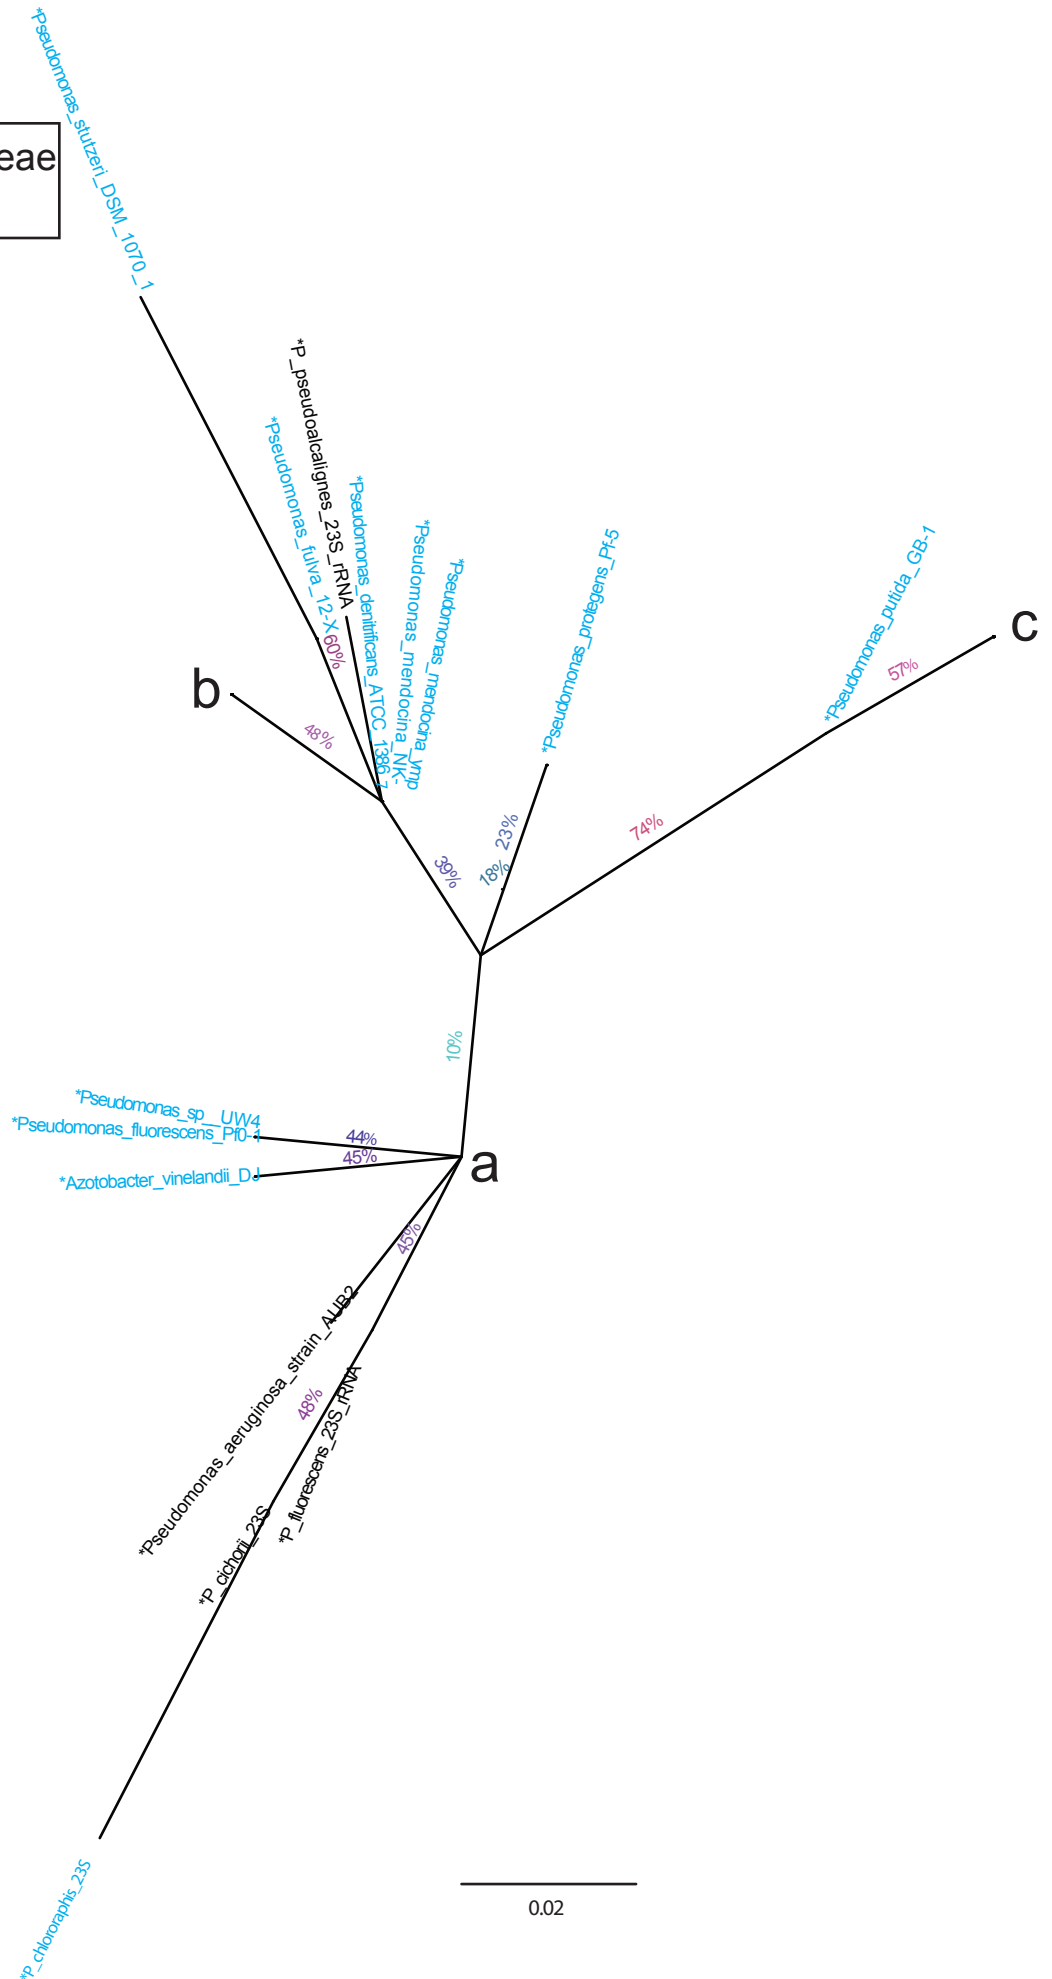

# H

BWA LCA: Pseudomonadaceae  
 Blast LCA: Cellular Organism

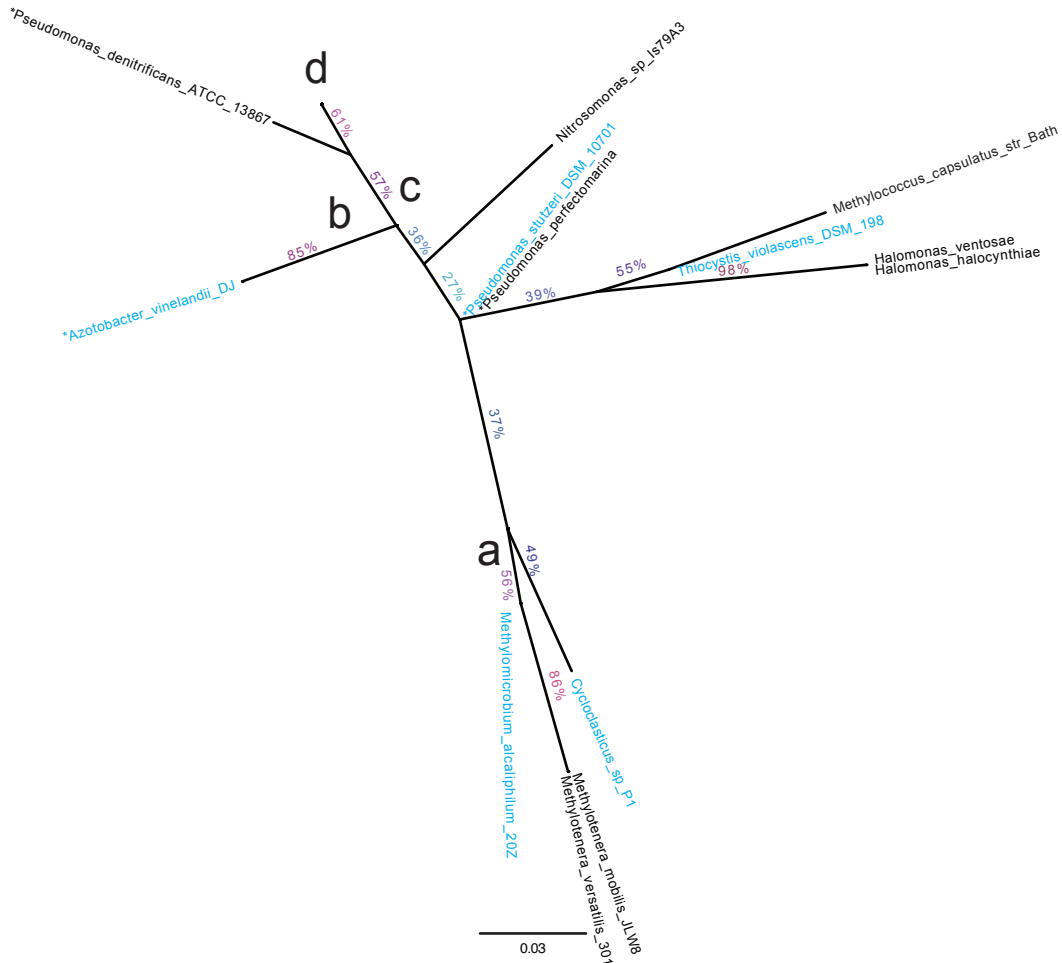

**a**

- SRR061837.18908151**
- \*Pseudomonas\_brassicacearum\_NFM421
  - \*Pseudomonas\_stutzeri\_A1501
  - \*Pseudomonas\_protegens\_Pf-5
  - \*Pseudomonas\_syringae\_pv\_phaseolicola\_1448A
  - \*Pseudomonas\_syringae\_pv\_tomato\_str\_DC3000
  - \*Pseudomonas\_fluorescens\_Pf29Arp
  - \*Pseudomonas\_poaie\_RE\*1-1-14
  - \*Pseudomonas\_stutzeri\_RCH2
  - \*Pseudomonas\_sp\_UW4
  - \*Pseudomonas\_stutzeri\_CCUG\_29243
  - \*Pseudomonas\_stutzeri\_23S
  - \*Pseudomonas\_fluorescens
  - \*Pseudomonas\_syringae\_pv\_syringae\_B728a
  - \*Pseudomonas\_fluorescens\_SBW25
  - \*Pseudomonas\_fluorescens\_Pf0-1
  - Albugo\_laibachii\_Nc14 (oomycete)
  - \*Pseudomonas\_stutzeri\_DSM\_4166
  - Albugo\_laibachii\_Alem1 (oomycete)
  - \*Pseudomonas\_stutzeri\_ATCC\_17588
  - \*Pseudomonas\_fluorescens\_F113
  - \*Pseudomonas\_fluorescens\_A506

**b**

- \*Pseudomonas\_entomophila\_str\_L48
- \*Pseudomonas\_mendocina\_NK-01
- \*Pseudomonas\_mendocina\_ypm
- \*Pseudomonas\_fulva\_12-X
- \*Pseudomonas\_putida\_F1
- \*Pseudomonas\_putida\_KT2440

**c**

- \*Pseudomonas\_putida\_HB3267
- \*Pseudomonas\_putida\_DOT-T1E
- \*Pseudomonas\_putida\_ND6
- \*Pseudomonas\_putida\_S16
- \*Pseudomonas\_putida\_BIRD-1
- \*Pseudomonas\_putida\_W619
- \*Pseudomonas\_putida\_GB-1

**d**

- \*Pseudomonas\_aeruginosa
- \*Pseudomonas\_aeruginosa\_strain\_ATCC\_27814
- \*Pseudomonas\_aeruginosa\_UCBPP-PA14
- \*Pseudomonas\_aeruginosa\_PA7
- \*Pseudomonas\_aeruginosa\_LESB58
- \*Pseudomonas\_aeruginosa\_strain\_DB3
- \*Pseudomonas\_aeruginosa\_strain\_AUB2
- \*Pseudomonas\_aeruginosa\_M18
- \*Pseudomonas\_aeruginosa\_NCGM2S1
- \*Pseudomonas\_aeruginosa\_DK2
- \*Pseudomonas\_aeruginosa\_PAO1
- \*Pseudomonas\_aeruginosa\_B136-33



BWA LCA: Pseudomonadaceae  
Blast LCA: Pseudomonadaceae

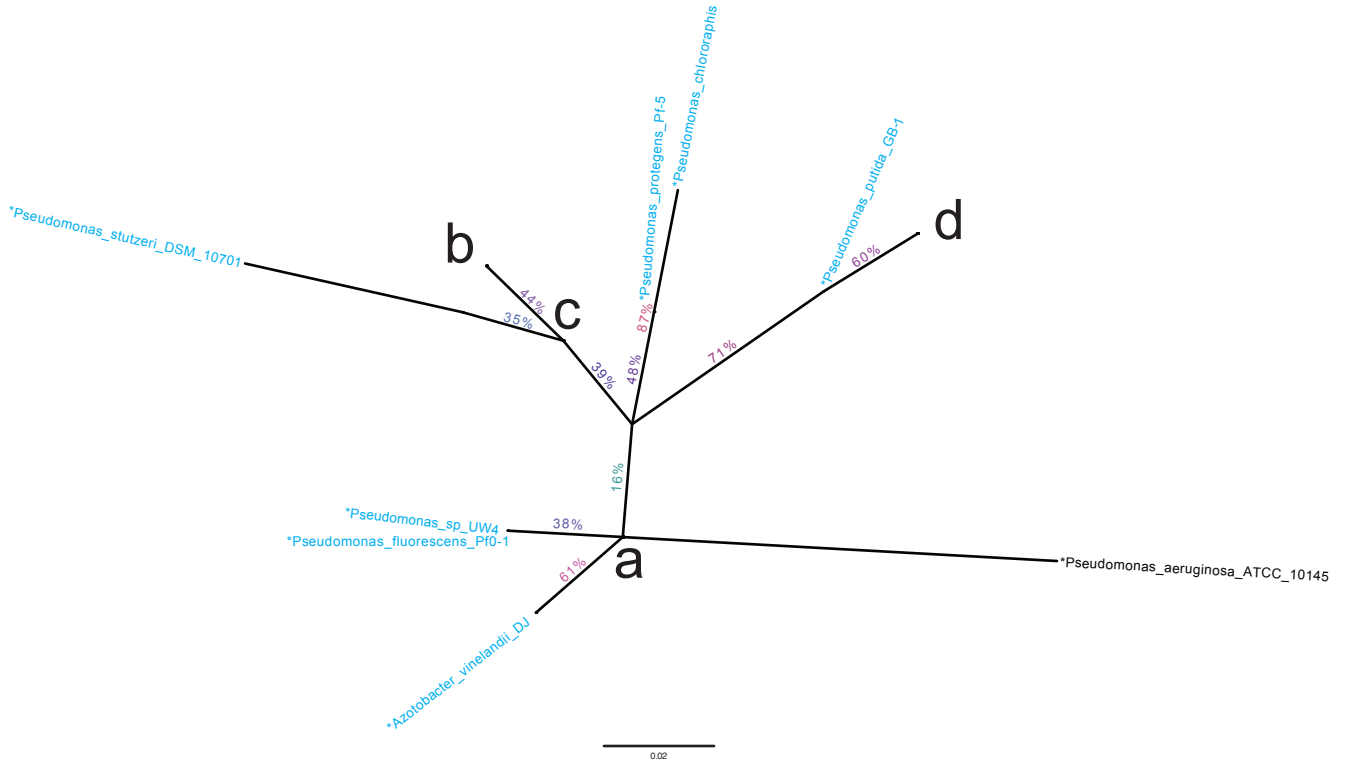

- a**
- \*Pseudomonas\_aeruginosa\_AUB2
  - \*Pseudomonas\_fluorescens
  - \*Pseudomonas\_aeruginosa
  - \*Pseudomonas\_aeruginosa\_UCBPP-PA14
  - \*Pseudomonas\_aeruginosa\_DB3
  - \*Pseudomonas\_fluorescens\_A506
  - \*Pseudomonas\_aeruginosa\_DK2
  - \*Pseudomonas\_fluorescens\_F113
  - \*Pseudomonas\_fluorescens\_SBW25
  - \*Pseudomonas\_syringae\_pv\_syringae\_UMAF0158
  - \*Pseudomonas\_syringae\_pv\_syringae\_B728a
  - \*Pseudomonas\_cichori
  - \*Pseudomonas\_fluorescens
  - \*Pseudomonas\_poae\_RE\*1-1-14
  - SRR061897.14995429
  - \*Pseudomonas\_aeruginosa\_B136-33
  - \*Pseudomonas\_brassicacearum\_NFM421
  - \*Pseudomonas\_syringae\_pv\_phaseolicola\_1448A
  - \*Pseudomonas\_syringae\_pv\_tomato\_str\_DC3000
  - \*Pseudomonas\_aeruginosa\_PAO1

- b**
- \*Pseudomonas\_fulva\_12-X
  - \*Pseudomonas\_perfectomarina
  - \*Pseudomonas\_stutzeri
  - \*Pseudomonas\_stutzeri\_DSM\_4166
  - \*Pseudomonas\_stutzeri\_ATCC\_17588
  - \*Pseudomonas\_stutzeri\_CCUG\_29243
  - \*Pseudomonas\_stutzeri\_RCH2
  - \*Pseudomonas\_stutzeri\_A1501
- c**
- \*Pseudomonas\_mendocina\_NK-01
  - \*Pseudomonas\_mendocina\_ymp
  - \*Pseudomonas\_pseudoalcaligenes
  - \*Pseudomonas\_denitrificans\_ATCC\_13867

- d**
- Rubrobacter\_radiotolerans
  - \*Pseudomonas\_entomophila\_str\_L48
  - \*Pseudomonas\_putida\_W619
  - \*Pseudomonas\_putida\_BIRD-1
  - \*Pseudomonas\_putida\_S16
  - \*Pseudomonas\_putida\_ND6
  - \*Pseudomonas\_putida\_DOT-T1E
  - \*Pseudomonas\_putida\_HB3267
  - \*Pseudomonas\_putida\_KT2440
  - \*Pseudomonas\_putida\_F1
