# Supplementary material for: Bacteria-Human Somatic Cell Lateral Gene Transfer Is Enriched in Cancer Samples
Source: PubMed Central journal article supplement (PMC3688693; doi:10.1371/journal.pcbi.1003107), 2013-06-20
Supplement: pcbi.1003107.s015.pdf [file pcbi.1003107.s015.pdf]

**Table S3. Percentage of reads with abnormal insert sizes for experimental and control samples**

| Panel in Figure S7 | Number of pairs with<br>>600 bp insert | Percentage of pairs with<br>> 600 bp insert |
|--------------------|----------------------------------------|---------------------------------------------|
| A                  | 150                                    | 0.055                                       |
| B                  | 1578                                   | 0.60                                        |
| C                  | 1551                                   | 0.57                                        |
| D                  | 273                                    | 0.19                                        |
| E                  | 263                                    | 0.65                                        |
| F                  | 191                                    | 0.80                                        |
| G                  | 297                                    | 0.73                                        |
| H                  | 12143                                  | 0.87                                        |
| I                  | 29430                                  | 0.23                                        |
| J                  | 26902                                  | 0.22                                        |
| K                  | 31854                                  | 0.26                                        |
| L                  | 34639                                  | 0.29                                        |
| M                  | 112579                                 | 0.97                                        |
| N                  | 101588                                 | 0.94                                        |
| O                  | 117153                                 | 1.1                                         |
| P                  | 109138                                 | 1.0                                         |
