# Supplementary material for: Bacteria-Human Somatic Cell Lateral Gene Transfer Is Enriched in Cancer Samples
Source: PLoS Comput Biol. 2013 Jun 20;9(6):e1003107. doi: 10.1371/journal.pcbi.1003107 (PMC3688693; doi:10.1371/journal.pcbi.1003107)
Supplement: Table S1 — Reads from the Trace Archive supporting LGT in the somatic human genome. The reads listed here contain non-overlapping matches to both human and bacteria sequences. Data deposited in various fields in the Trace Archive are presented along with a with a summary of the results generated. (XLSX) [file pcbi.1003107.s011.xlsx]

## Sheet: Sheet1
Table S1. Trace Archive reads that contained non-overlapping matches to human and bacteria sequences. Data deposited in various fields in the Trace Archive are presented along with a summary of the results of a blast of the read against NT.
		template_id	clone_id	trace_end	trace_name	Blast URL	Chromatogram URL	Genera of best blast match	Blast alignment length	Blast e-value	individual_id	center_name	center_project	seq_lib_id	run_group_id	run_date	run_machine_id	plate_id	well_id	strategy
	Achromobacter
		171515_ABC9_3_5_000043958900_E21	171515_ABC9_3_5_000043958900_E21	R	73550377	http://lgt.igs.umaryland.edu/traces/73550377_171515_ABC9_3_5_000043958900_E21.html	http://trace.ncbi.nlm.nih.gov/Traces/trace.cgi?&cmd=retrieve&val=TRACE_NAME='73550377' and TEMPLATE_ID='171515_ABC9_3_5_000043958900_E21'&dopt=trace&size=1&seeas=Show	Achromobacter	201	1e-83	NA18956	ABC	Human_NA18956	ABC9_3_5		2006-03-12	ZK	46226800	e21	WGA
		166910_ABC8_000042119800_F24	166910_ABC8_000042119800_F24	R	63379537	http://lgt.igs.umaryland.edu/traces/63379537_166910_ABC8_000042119800_F24.html	http://trace.ncbi.nlm.nih.gov/Traces/trace.cgi?&cmd=retrieve&val=TRACE_NAME='63379537' and TEMPLATE_ID='166910_ABC8_000042119800_F24'&dopt=trace&size=1&seeas=Show	Achromobacter	107	1e-34	NA18507	ABC	Human_NA18507	ABC8		2005-11-06	ZS	43265700	f24	WGA
		HWWHP928779		R	52357219	http://lgt.igs.umaryland.edu/traces/52357219_HWWHP928779.html	http://trace.ncbi.nlm.nih.gov/Traces/trace.cgi?&cmd=retrieve&val=TRACE_NAME='52357219' and TEMPLATE_ID='HWWHP928779'&dopt=trace&size=1&seeas=Show	Achromobacter	316	2e-130		BCM	HWWH	HWWHP	694952	2003-04-07	rom	HWWHP1E928700
		HWWHP486638		F	51760589	http://lgt.igs.umaryland.edu/traces/51760589_HWWHP486638.html	http://trace.ncbi.nlm.nih.gov/Traces/trace.cgi?&cmd=retrieve&val=TRACE_NAME='51760589' and TEMPLATE_ID='HWWHP486638'&dopt=trace&size=1&seeas=Show	Achromobacter	140	3e-30		BCM	HWWH	HWWHP	687388	2003-04-01	cha	HWWHP1D486600
		HWWHP286647		R	50948350	http://lgt.igs.umaryland.edu/traces/50948350_HWWHP286647.html	http://trace.ncbi.nlm.nih.gov/Traces/trace.cgi?&cmd=retrieve&val=TRACE_NAME='50948350' and TEMPLATE_ID='HWWHP286647'&dopt=trace&size=1&seeas=Show	Achromobacter	119	6e-37		BCM	HWWH	HWWHP	677906	2003-03-22	lsa	HWWHP1E286600
		HWWHQ222452		F	55095146	http://lgt.igs.umaryland.edu/traces/55095146_HWWHQ222452.html	http://trace.ncbi.nlm.nih.gov/Traces/trace.cgi?&cmd=retrieve&val=TRACE_NAME='55095146' and TEMPLATE_ID='HWWHQ222452'&dopt=trace&size=1&seeas=Show	Achromobacter	321	4e-119		BCM	HWWH	HWWHQ	729778	2003-05-09	phi	HWWHQ1D222400
		HWWIP151230		R	56219866	http://lgt.igs.umaryland.edu/traces/56219866_HWWIP151230.html	http://trace.ncbi.nlm.nih.gov/Traces/trace.cgi?&cmd=retrieve&val=TRACE_NAME='56219866' and TEMPLATE_ID='HWWIP151230'&dopt=trace&size=1&seeas=Show	Achromobacter	174	1e-57		BCM	HWWI	HWWIP	743852	2003-05-21	syr	HWWIP1E151200
		HWWIP168203		F	56400189	http://lgt.igs.umaryland.edu/traces/56400189_HWWIP168203.html	http://trace.ncbi.nlm.nih.gov/Traces/trace.cgi?&cmd=retrieve&val=TRACE_NAME='56400189' and TEMPLATE_ID='HWWIP168203'&dopt=trace&size=1&seeas=Show	Achromobacter	548	0		BCM	HWWI	HWWIP	746325	2003-05-23	tld	HWWIP1D168200
		HWWIP364688		R	56807068	http://lgt.igs.umaryland.edu/traces/56807068_HWWIP364688.html	http://trace.ncbi.nlm.nih.gov/Traces/trace.cgi?&cmd=retrieve&val=TRACE_NAME='56807068' and TEMPLATE_ID='HWWIP364688'&dopt=trace&size=1&seeas=Show	Achromobacter	401	9e-117		BCM	HWWI	HWWIP	750935	2003-05-28	sgp	HWWIP1E364600
		HWWHQ45079		R	52435736	http://lgt.igs.umaryland.edu/traces/52435736_HWWHQ45079.html	http://trace.ncbi.nlm.nih.gov/Traces/trace.cgi?&cmd=retrieve&val=TRACE_NAME='52435736' and TEMPLATE_ID='HWWHQ45079'&dopt=trace&size=1&seeas=Show	Achromobacter	229	4e-88		BCM	HWWH	HWWHQ	696197	2003-04-09	sam	HWWHQ2E45000
		166671_ABC7_000043047500_O3	166671_ABC7_000043047500_O3	F	62229648	http://lgt.igs.umaryland.edu/traces/62229648_166671_ABC7_000043047500_O3.html	http://trace.ncbi.nlm.nih.gov/Traces/trace.cgi?&cmd=retrieve&val=TRACE_NAME='62229648' and TEMPLATE_ID='166671_ABC7_000043047500_O3'&dopt=trace&size=1&seeas=Show	Achromobacter	307	3e-125	NA18517	ABC	Human_NA18517	ABC7		2005-10-12	ZL	41986500	o3	WGA
		166671_ABC7_000043055600_E4	166671_ABC7_000043055600_E4	F	62249871	http://lgt.igs.umaryland.edu/traces/62249871_166671_ABC7_000043055600_E4.html	http://trace.ncbi.nlm.nih.gov/Traces/trace.cgi?&cmd=retrieve&val=TRACE_NAME='62249871' and TEMPLATE_ID='166671_ABC7_000043055600_E4'&dopt=trace&size=1&seeas=Show	Achromobacter	303	2e-120	NA18517	ABC	Human_NA18517	ABC7		2005-10-13	ZT	42718800	e4	WGA
		166752_ABC7_000043060900_G2	166752_ABC7_000043060900_G2	R	62309508	http://lgt.igs.umaryland.edu/traces/62309508_166752_ABC7_000043060900_G2.html	http://trace.ncbi.nlm.nih.gov/Traces/trace.cgi?&cmd=retrieve&val=TRACE_NAME='62309508' and TEMPLATE_ID='166752_ABC7_000043060900_G2'&dopt=trace&size=1&seeas=Show	Achromobacter	275	8e-116	NA18517	ABC	Human_NA18517	ABC7		2005-10-14	ZE	42730900	g2	WGA
		172343_ABC9_3_5_000046293000_N6	172343_ABC9_3_5_000046293000_N6	R	75079431	http://lgt.igs.umaryland.edu/traces/75079431_172343_ABC9_3_5_000046293000_N6.html	http://trace.ncbi.nlm.nih.gov/Traces/trace.cgi?&cmd=retrieve&val=TRACE_NAME='75079431' and TEMPLATE_ID='172343_ABC9_3_5_000046293000_N6'&dopt=trace&size=1&seeas=Show	Achromobacter	235	3e-94	NA18956	ABC	Human_NA18956	ABC9_3_5		2006-03-25	AG	45394900	n6	WGA
		167098_ABC8_000040891000_F3	167098_ABC8_000040891000_F3	R	64943989	http://lgt.igs.umaryland.edu/traces/64943989_167098_ABC8_000040891000_F3.html	http://trace.ncbi.nlm.nih.gov/Traces/trace.cgi?&cmd=retrieve&val=TRACE_NAME='64943989' and TEMPLATE_ID='167098_ABC8_000040891000_F3'&dopt=trace&size=1&seeas=Show	Achromobacter	208	1e-56	NA18507	ABC	Human_NA18507	ABC8		2005-12-02	ZT	42269700	f3	WGA
		166081_ABC8_000043015800_A5	166081_ABC8_000043015800_A5	R	61611122	http://lgt.igs.umaryland.edu/traces/61611122_166081_ABC8_000043015800_A5.html	http://trace.ncbi.nlm.nih.gov/Traces/trace.cgi?&cmd=retrieve&val=TRACE_NAME='61611122' and TEMPLATE_ID='166081_ABC8_000043015800_A5'&dopt=trace&size=1&seeas=Show	Achromobacter	322	1e-81	NA18507	ABC	Human_NA18507	ABC8		2005-10-02	AD	42635500	a5	WGA
		166941_ABC7_000042058800_P21	166941_ABC7_000042058800_P21	F	62901014	http://lgt.igs.umaryland.edu/traces/62901014_166941_ABC7_000042058800_P21.html	http://trace.ncbi.nlm.nih.gov/Traces/trace.cgi?&cmd=retrieve&val=TRACE_NAME='62901014' and TEMPLATE_ID='166941_ABC7_000042058800_P21'&dopt=trace&size=1&seeas=Show	Achromobacter	119	2e-39	NA18517	ABC	Human_NA18517	ABC7		2005-10-27	ZG	43117100	p21	WGA
		170215_ABC9_3_2_000043880200_D6	170215_ABC9_3_2_000043880200_D6	R	72049674	http://lgt.igs.umaryland.edu/traces/72049674_170215_ABC9_3_2_000043880200_D6.html	http://trace.ncbi.nlm.nih.gov/Traces/trace.cgi?&cmd=retrieve&val=TRACE_NAME='72049674' and TEMPLATE_ID='170215_ABC9_3_2_000043880200_D6'&dopt=trace&size=1&seeas=Show	Achromobacter	153	3e-57	NA18956	ABC	Human_NA18956	ABC9_3_2		2006-02-28	ZJ	46026000	d6	WGA
		170215_ABC9_3_2_000045917900_B3	170215_ABC9_3_2_000045917900_B3	R	70758195	http://lgt.igs.umaryland.edu/traces/70758195_170215_ABC9_3_2_000045917900_B3.html	http://trace.ncbi.nlm.nih.gov/Traces/trace.cgi?&cmd=retrieve&val=TRACE_NAME='70758195' and TEMPLATE_ID='170215_ABC9_3_2_000045917900_B3'&dopt=trace&size=1&seeas=Show	Achromobacter	153	3e-57	NA18956	ABC	Human_NA18956	ABC9_3_2		2006-02-16	ZD	45118500	b3	WGA
	Achromobacter,Acidovorax,Alicycliphilus,Arthrobacter,Bordetella,Burkholderia,Comamonas,Cupriavidus,Curvibacter,Delftia,Pseudomonas,Ralstonia,Variovorax,uncultured
		174552_ABC10_2_1_000044690800_O17	174552_ABC10_2_1_000044690800_O17	F	80127024	http://lgt.igs.umaryland.edu/traces/80127024_174552_ABC10_2_1_000044690800_O17.html	http://trace.ncbi.nlm.nih.gov/Traces/trace.cgi?&cmd=retrieve&val=TRACE_NAME='80127024' and TEMPLATE_ID='174552_ABC10_2_1_000044690800_O17'&dopt=trace&size=1&seeas=Show	Achromobacter,Acidovorax,Alicycliphilus,Arthrobacter,Bordetella,Burkholderia,Comamonas,Cupriavidus,Curvibacter,Delftia,Pseudomonas,Ralstonia,Variovorax,uncultured	103	8e-49	NA19240	ABC	Human_NA19240	ABC10_2_1		2006-05-13	ZT	44746400	o17	WGA
		174552_ABC10_2_1_000044715600_J10	174552_ABC10_2_1_000044715600_J10	R	80330963	http://lgt.igs.umaryland.edu/traces/80330963_174552_ABC10_2_1_000044715600_J10.html	http://trace.ncbi.nlm.nih.gov/Traces/trace.cgi?&cmd=retrieve&val=TRACE_NAME='80330963' and TEMPLATE_ID='174552_ABC10_2_1_000044715600_J10'&dopt=trace&size=1&seeas=Show	Achromobacter,Acidovorax,Alicycliphilus,Arthrobacter,Bordetella,Burkholderia,Comamonas,Cupriavidus,Curvibacter,Delftia,Pseudomonas,Ralstonia,Variovorax,uncultured	178	1e-93	NA19240	ABC	Human_NA19240	ABC10_2_1		2006-05-14	ZF	44755400	j10	WGA
		174552_ABC10_2_1_000044634900_H13	174552_ABC10_2_1_000044634900_H13	R	79802468	http://lgt.igs.umaryland.edu/traces/79802468_174552_ABC10_2_1_000044634900_H13.html	http://trace.ncbi.nlm.nih.gov/Traces/trace.cgi?&cmd=retrieve&val=TRACE_NAME='79802468' and TEMPLATE_ID='174552_ABC10_2_1_000044634900_H13'&dopt=trace&size=1&seeas=Show	Achromobacter,Acidovorax,Alicycliphilus,Arthrobacter,Bordetella,Burkholderia,Comamonas,Cupriavidus,Curvibacter,Delftia,Pseudomonas,Ralstonia,Variovorax,uncultured	186	2e-98	NA19240	ABC	Human_NA19240	ABC10_2_1		2006-05-09	ZR	44664700	h13	WGA
		170215_ABC9_3_2_000041275700_J7	170215_ABC9_3_2_000041275700_J7	R	70543327	http://lgt.igs.umaryland.edu/traces/70543327_170215_ABC9_3_2_000041275700_J7.html	http://trace.ncbi.nlm.nih.gov/Traces/trace.cgi?&cmd=retrieve&val=TRACE_NAME='70543327' and TEMPLATE_ID='170215_ABC9_3_2_000041275700_J7'&dopt=trace&size=1&seeas=Show	Achromobacter,Acidovorax,Alicycliphilus,Arthrobacter,Bordetella,Burkholderia,Comamonas,Cupriavidus,Curvibacter,Delftia,Pseudomonas,Ralstonia,Variovorax,uncultured	161	2e-83	NA18956	ABC	Human_NA18956	ABC9_3_2		2006-02-13	ZI	45101500	j7	WGA
		163285_ABC7_000040584800_P21	ABC7_000040584800_P21	F	54864756	http://lgt.igs.umaryland.edu/traces/54864756_163285_ABC7_000040584800_P21.html	http://trace.ncbi.nlm.nih.gov/Traces/trace.cgi?&cmd=retrieve&val=TRACE_NAME='54864756' and TEMPLATE_ID='163285_ABC7_000040584800_P21'&dopt=trace&size=1&seeas=Show	Achromobacter,Acidovorax,Alicycliphilus,Arthrobacter,Bordetella,Burkholderia,Comamonas,Cupriavidus,Curvibacter,Delftia,Pseudomonas,Ralstonia,Variovorax,uncultured	368	0	NA18517	ABC	Human_NA18517	ABC7		2005-06-16	AC	41708100	p21	WGA
		163460_ABC7_000040592700_P21	ABC7_000040592700_P21	R	55041316	http://lgt.igs.umaryland.edu/traces/55041316_163460_ABC7_000040592700_P21.html	http://trace.ncbi.nlm.nih.gov/Traces/trace.cgi?&cmd=retrieve&val=TRACE_NAME='55041316' and TEMPLATE_ID='163460_ABC7_000040592700_P21'&dopt=trace&size=1&seeas=Show	Achromobacter,Acidovorax,Alicycliphilus,Arthrobacter,Bordetella,Burkholderia,Comamonas,Cupriavidus,Curvibacter,Delftia,Pseudomonas,Ralstonia,Variovorax,uncultured	249	5e-136	NA18517	ABC	Human_NA18517	ABC7		2005-06-22	ZX	41713800	p21	WGA
		163460_ABC7_000040591000_H3	ABC7_000040591000_H3	R	55218496	http://lgt.igs.umaryland.edu/traces/55218496_163460_ABC7_000040591000_H3.html	http://trace.ncbi.nlm.nih.gov/Traces/trace.cgi?&cmd=retrieve&val=TRACE_NAME='55218496' and TEMPLATE_ID='163460_ABC7_000040591000_H3'&dopt=trace&size=1&seeas=Show	Achromobacter,Acidovorax,Alicycliphilus,Arthrobacter,Bordetella,Burkholderia,Comamonas,Cupriavidus,Curvibacter,Delftia,Pseudomonas,Ralstonia,Variovorax,uncultured	333	0	NA18517	ABC	Human_NA18517	ABC7		2005-06-30	AE	41729700	h3	WGA
		163460_ABC7_000040592900_I3	ABC7_000040592900_I3	F	55042173	http://lgt.igs.umaryland.edu/traces/55042173_163460_ABC7_000040592900_I3.html	http://trace.ncbi.nlm.nih.gov/Traces/trace.cgi?&cmd=retrieve&val=TRACE_NAME='55042173' and TEMPLATE_ID='163460_ABC7_000040592900_I3'&dopt=trace&size=1&seeas=Show	Achromobacter,Acidovorax,Alicycliphilus,Arthrobacter,Bordetella,Burkholderia,Comamonas,Cupriavidus,Curvibacter,Delftia,Pseudomonas,Ralstonia,Variovorax,uncultured	168	6e-83	NA18517	ABC	Human_NA18517	ABC7		2005-06-22	ZV	41714600	i3	WGA
	Achromobacter,Bordetella
		HWWHP225778		F	50906343	http://lgt.igs.umaryland.edu/traces/50906343_HWWHP225778.html	http://trace.ncbi.nlm.nih.gov/Traces/trace.cgi?&cmd=retrieve&val=TRACE_NAME='50906343' and TEMPLATE_ID='HWWHP225778'&dopt=trace&size=1&seeas=Show	Achromobacter,Bordetella	574	0		BCM	HWWH	HWWHP	677467	2003-03-22	rom	HWWHP1D225700
	Acidithiobacillus
		166377_ABC7_000000482222_I8	166377_ABC7_000000482222_I8	R	61894971	http://lgt.igs.umaryland.edu/traces/61894971_166377_ABC7_000000482222_I8.html	http://trace.ncbi.nlm.nih.gov/Traces/trace.cgi?&cmd=retrieve&val=TRACE_NAME='61894971' and TEMPLATE_ID='166377_ABC7_000000482222_I8'&dopt=trace&size=1&seeas=Show	Acidithiobacillus	150	7e-77	NA18517	ABC	Human_NA18517	ABC7		2005-10-08	ZM	522822	i8	WGA
		166863_ABC7_000043080200_P14	166863_ABC7_000043080200_P14	R	62642645	http://lgt.igs.umaryland.edu/traces/62642645_166863_ABC7_000043080200_P14.html	http://trace.ncbi.nlm.nih.gov/Traces/trace.cgi?&cmd=retrieve&val=TRACE_NAME='62642645' and TEMPLATE_ID='166863_ABC7_000043080200_P14'&dopt=trace&size=1&seeas=Show	Acidithiobacillus	251	3e-137	NA18517	ABC	Human_NA18517	ABC7		2005-10-21	ZP	42009700	p14	WGA
	Acidovorax
		170143_ABC8_4_1_000041198000_C1	170143_ABC8_4_1_000041198000_C1	F	69137596	http://lgt.igs.umaryland.edu/traces/69137596_170143_ABC8_4_1_000041198000_C1.html	http://trace.ncbi.nlm.nih.gov/Traces/trace.cgi?&cmd=retrieve&val=TRACE_NAME='69137596' and TEMPLATE_ID='170143_ABC8_4_1_000041198000_C1'&dopt=trace&size=1&seeas=Show	Acidovorax	256	2e-135	NA18507	ABC	Human_NA18507	ABC8_4_1		2006-01-30	ZG	45844900	c1	WGA
		170215_ABC9_3_2_000043878800_J1	170215_ABC9_3_2_000043878800_J1	R	72161388	http://lgt.igs.umaryland.edu/traces/72161388_170215_ABC9_3_2_000043878800_J1.html	http://trace.ncbi.nlm.nih.gov/Traces/trace.cgi?&cmd=retrieve&val=TRACE_NAME='72161388' and TEMPLATE_ID='170215_ABC9_3_2_000043878800_J1'&dopt=trace&size=1&seeas=Show	Acidovorax	207	1e-103	NA18956	ABC	Human_NA18956	ABC9_3_2		2006-03-01	ZU	46049400	j1	WGA
		170215_ABC9_3_2_000046006700_K19	170215_ABC9_3_2_000046006700_K19	R	72243534	http://lgt.igs.umaryland.edu/traces/72243534_170215_ABC9_3_2_000046006700_K19.html	http://trace.ncbi.nlm.nih.gov/Traces/trace.cgi?&cmd=retrieve&val=TRACE_NAME='72243534' and TEMPLATE_ID='170215_ABC9_3_2_000046006700_K19'&dopt=trace&size=1&seeas=Show	Acidovorax	558	0	NA18956	ABC	Human_NA18956	ABC9_3_2		2006-03-02	ZH	46064100	k19	WGA
		170215_ABC9_000043898400_G24	170215_ABC9_000043898400_G24	F	72370624	http://lgt.igs.umaryland.edu/traces/72370624_170215_ABC9_000043898400_G24.html	http://trace.ncbi.nlm.nih.gov/Traces/trace.cgi?&cmd=retrieve&val=TRACE_NAME='72370624' and TEMPLATE_ID='170215_ABC9_000043898400_G24'&dopt=trace&size=1&seeas=Show	Acidovorax	305	2e-157	NA18956	ABC	Human_NA18956	ABC9		2006-03-03	AA	46078800	g24	WGA
		171515_ABC9_3_5_000043893500_C16	171515_ABC9_3_5_000043893500_C16	R	72475490	http://lgt.igs.umaryland.edu/traces/72475490_171515_ABC9_3_5_000043893500_C16.html	http://trace.ncbi.nlm.nih.gov/Traces/trace.cgi?&cmd=retrieve&val=TRACE_NAME='72475490' and TEMPLATE_ID='171515_ABC9_3_5_000043893500_C16'&dopt=trace&size=1&seeas=Show	Acidovorax	506	0	NA18956	ABC	Human_NA18956	ABC9_3_5		2006-03-03	ZK	46103400	c16	WGA
		171515_ABC9_3_5_000043906900_O20	171515_ABC9_3_5_000043906900_O20	R	72504633	http://lgt.igs.umaryland.edu/traces/72504633_171515_ABC9_3_5_000043906900_O20.html	http://trace.ncbi.nlm.nih.gov/Traces/trace.cgi?&cmd=retrieve&val=TRACE_NAME='72504633' and TEMPLATE_ID='171515_ABC9_3_5_000043906900_O20'&dopt=trace&size=1&seeas=Show	Acidovorax	286	6e-139	NA18956	ABC	Human_NA18956	ABC9_3_5		2006-03-03	ZU	46108300	o20	WGA
		171515_ABC9_3_5_000043956800_N12	171515_ABC9_3_5_000043956800_N12	R	73543405	http://lgt.igs.umaryland.edu/traces/73543405_171515_ABC9_3_5_000043956800_N12.html	http://trace.ncbi.nlm.nih.gov/Traces/trace.cgi?&cmd=retrieve&val=TRACE_NAME='73543405' and TEMPLATE_ID='171515_ABC9_3_5_000043956800_N12'&dopt=trace&size=1&seeas=Show	Acidovorax	174	3e-91	NA18956	ABC	Human_NA18956	ABC9_3_5		2006-03-13	AJ	45268700	n12	WGA
		170215_ABC9_3_2_000045237400_J23	170215_ABC9_3_2_000045237400_J23	F	72117183	http://lgt.igs.umaryland.edu/traces/72117183_170215_ABC9_3_2_000045237400_J23.html	http://trace.ncbi.nlm.nih.gov/Traces/trace.cgi?&cmd=retrieve&val=TRACE_NAME='72117183' and TEMPLATE_ID='170215_ABC9_3_2_000045237400_J23'&dopt=trace&size=1&seeas=Show	Acidovorax	102	1e-38	NA18956	ABC	Human_NA18956	ABC9_3_2		2006-03-01	AD	46065900	j23	WGA
		171515_ABC9_3_5_000046212000_D6	171515_ABC9_3_5_000046212000_D6	R	73682154	http://lgt.igs.umaryland.edu/traces/73682154_171515_ABC9_3_5_000046212000_D6.html	http://trace.ncbi.nlm.nih.gov/Traces/trace.cgi?&cmd=retrieve&val=TRACE_NAME='73682154' and TEMPLATE_ID='171515_ABC9_3_5_000046212000_D6'&dopt=trace&size=1&seeas=Show	Acidovorax	150	5e-77	NA18956	ABC	Human_NA18956	ABC9_3_5		2006-03-14	ZP	45257100	d6	WGA
		171515_ABC9_3_5_000043955400_I15	171515_ABC9_3_5_000043955400_I15	F	73453247	http://lgt.igs.umaryland.edu/traces/73453247_171515_ABC9_3_5_000043955400_I15.html	http://trace.ncbi.nlm.nih.gov/Traces/trace.cgi?&cmd=retrieve&val=TRACE_NAME='73453247' and TEMPLATE_ID='171515_ABC9_3_5_000043955400_I15'&dopt=trace&size=1&seeas=Show	Acidovorax	123	3e-51	NA18956	ABC	Human_NA18956	ABC9_3_5		2006-03-12	ZR	45274700	i15	WGA
		172343_ABC9_3_5_000043968400_I11	172343_ABC9_3_5_000043968400_I11	R	74119078	http://lgt.igs.umaryland.edu/traces/74119078_172343_ABC9_3_5_000043968400_I11.html	http://trace.ncbi.nlm.nih.gov/Traces/trace.cgi?&cmd=retrieve&val=TRACE_NAME='74119078' and TEMPLATE_ID='172343_ABC9_3_5_000043968400_I11'&dopt=trace&size=1&seeas=Show	Acidovorax	129	5e-50	NA18956	ABC	Human_NA18956	ABC9_3_5		2006-03-17	AB	45305000	i11	WGA
		172343_ABC9_3_5_000043964900_L2	172343_ABC9_3_5_000043964900_L2	F	73916621	http://lgt.igs.umaryland.edu/traces/73916621_172343_ABC9_3_5_000043964900_L2.html	http://trace.ncbi.nlm.nih.gov/Traces/trace.cgi?&cmd=retrieve&val=TRACE_NAME='73916621' and TEMPLATE_ID='172343_ABC9_3_5_000043964900_L2'&dopt=trace&size=1&seeas=Show	Acidovorax	241	1e-121	NA18956	ABC	Human_NA18956	ABC9_3_5		2006-03-15	AA	45291800	l2	WGA
		171515_ABC9_3_5_000043957900_K1	171515_ABC9_3_5_000043957900_K1	R	73541622	http://lgt.igs.umaryland.edu/traces/73541622_171515_ABC9_3_5_000043957900_K1.html	http://trace.ncbi.nlm.nih.gov/Traces/trace.cgi?&cmd=retrieve&val=TRACE_NAME='73541622' and TEMPLATE_ID='171515_ABC9_3_5_000043957900_K1'&dopt=trace&size=1&seeas=Show	Acidovorax	360	2e-111	NA18956	ABC	Human_NA18956	ABC9_3_5		2006-03-13	AL	46225300	k1	WGA
		170215_ABC9_3_2_000046008900_D20	170215_ABC9_3_2_000046008900_D20	R	72116530	http://lgt.igs.umaryland.edu/traces/72116530_170215_ABC9_3_2_000046008900_D20.html	http://trace.ncbi.nlm.nih.gov/Traces/trace.cgi?&cmd=retrieve&val=TRACE_NAME='72116530' and TEMPLATE_ID='170215_ABC9_3_2_000046008900_D20'&dopt=trace&size=1&seeas=Show	Acidovorax	164	7e-76	NA18956	ABC	Human_NA18956	ABC9_3_2		2006-02-28	AD	46051100	d20	WGA
		171515_ABC9_3_5_000043950300_H19	171515_ABC9_3_5_000043950300_H19	F	73257968	http://lgt.igs.umaryland.edu/traces/73257968_171515_ABC9_3_5_000043950300_H19.html	http://trace.ncbi.nlm.nih.gov/Traces/trace.cgi?&cmd=retrieve&val=TRACE_NAME='73257968' and TEMPLATE_ID='171515_ABC9_3_5_000043950300_H19'&dopt=trace&size=1&seeas=Show	Acidovorax	133	1e-59	NA18956	ABC	Human_NA18956	ABC9_3_5		2006-03-11	AG	45257500	h19	WGA
		HWWHP214075		F	51053796	http://lgt.igs.umaryland.edu/traces/51053796_HWWHP214075.html	http://trace.ncbi.nlm.nih.gov/Traces/trace.cgi?&cmd=retrieve&val=TRACE_NAME='51053796' and TEMPLATE_ID='HWWHP214075'&dopt=trace&size=1&seeas=Show	Acidovorax	369	5e-100		BCM	HWWH	HWWHP	679008	2003-03-24	kwt	HWWHP2D214000
		HWWHP772941		R	51318227	http://lgt.igs.umaryland.edu/traces/51318227_HWWHP772941.html	http://trace.ncbi.nlm.nih.gov/Traces/trace.cgi?&cmd=retrieve&val=TRACE_NAME='51318227' and TEMPLATE_ID='HWWHP772941'&dopt=trace&size=1&seeas=Show	Acidovorax	203	2e-46		BCM	HWWH	HWWHP	682165	2003-03-26	bra	HWWHP1E772900
		HWWHP144661		R	50581302	http://lgt.igs.umaryland.edu/traces/50581302_HWWHP144661.html	http://trace.ncbi.nlm.nih.gov/Traces/trace.cgi?&cmd=retrieve&val=TRACE_NAME='50581302' and TEMPLATE_ID='HWWHP144661'&dopt=trace&size=1&seeas=Show	Acidovorax	159	2e-77		BCM	HWWH	HWWHP	673410	2003-03-18	col	HWWHP1E144600
		174779_ABC12_000046377600_D18	174779_ABC12_000046377600_D18	F	85097906	http://lgt.igs.umaryland.edu/traces/85097906_174779_ABC12_000046377600_D18.html	http://trace.ncbi.nlm.nih.gov/Traces/trace.cgi?&cmd=retrieve&val=TRACE_NAME='85097906' and TEMPLATE_ID='174779_ABC12_000046377600_D18'&dopt=trace&size=1&seeas=Show	Acidovorax	197	8e-98	NA12878	ABC	Human_NA12878	ABC12		2006-06-25	ZW	46396200	d18	WGA
		174779_ABC12_000007920949_M21	174779_ABC12_000007920949_M21	R	83209857	http://lgt.igs.umaryland.edu/traces/83209857_174779_ABC12_000007920949_M21.html	http://trace.ncbi.nlm.nih.gov/Traces/trace.cgi?&cmd=retrieve&val=TRACE_NAME='83209857' and TEMPLATE_ID='174779_ABC12_000007920949_M21'&dopt=trace&size=1&seeas=Show	Acidovorax	114	2e-55	NA12878	ABC	Human_NA12878	ABC12		2006-06-08	ZY	7926449	m21	WGA
		174779_ABC12_000007921149_H8	174779_ABC12_000007921149_H8	R	83246396	http://lgt.igs.umaryland.edu/traces/83246396_174779_ABC12_000007921149_H8.html	http://trace.ncbi.nlm.nih.gov/Traces/trace.cgi?&cmd=retrieve&val=TRACE_NAME='83246396' and TEMPLATE_ID='174779_ABC12_000007921149_H8'&dopt=trace&size=1&seeas=Show	Acidovorax	105	4e-50	NA12878	ABC	Human_NA12878	ABC12		2006-06-09	ZF	5828249	h8	WGA
		174779_ABC12_000046901600_N6	174779_ABC12_000046901600_N6	F	84184025	http://lgt.igs.umaryland.edu/traces/84184025_174779_ABC12_000046901600_N6.html	http://trace.ncbi.nlm.nih.gov/Traces/trace.cgi?&cmd=retrieve&val=TRACE_NAME='84184025' and TEMPLATE_ID='174779_ABC12_000046901600_N6'&dopt=trace&size=1&seeas=Show	Acidovorax	188	3e-97	NA12878	ABC	Human_NA12878	ABC12		2006-06-17	ZH	46918600	n6	WGA
		174779_ABC12_000046991800_I2	174779_ABC12_000046991800_I2	F	87385647	http://lgt.igs.umaryland.edu/traces/87385647_174779_ABC12_000046991800_I2.html	http://trace.ncbi.nlm.nih.gov/Traces/trace.cgi?&cmd=retrieve&val=TRACE_NAME='87385647' and TEMPLATE_ID='174779_ABC12_000046991800_I2'&dopt=trace&size=1&seeas=Show	Acidovorax	191	8e-97	NA12878	ABC	Human_NA12878	ABC12		2006-07-25	ZK	46540900	i2	WGA
		174552_ABC10_2_1_000046677300_F3	174552_ABC10_2_1_000046677300_F3	F	81789901	http://lgt.igs.umaryland.edu/traces/81789901_174552_ABC10_2_1_000046677300_F3.html	http://trace.ncbi.nlm.nih.gov/Traces/trace.cgi?&cmd=retrieve&val=TRACE_NAME='81789901' and TEMPLATE_ID='174552_ABC10_2_1_000046677300_F3'&dopt=trace&size=1&seeas=Show	Acidovorax	520	0	NA19240	ABC	Human_NA19240	ABC10_2_1		2006-05-27	ZH	48993400	f3	WGA
		174779_ABC12_000049207600_E1	174779_ABC12_000049207600_E1	R	89634149	http://lgt.igs.umaryland.edu/traces/89634149_174779_ABC12_000049207600_E1.html	http://trace.ncbi.nlm.nih.gov/Traces/trace.cgi?&cmd=retrieve&val=TRACE_NAME='89634149' and TEMPLATE_ID='174779_ABC12_000049207600_E1'&dopt=trace&size=1&seeas=Show	Acidovorax	169	3e-88	NA12878	ABC	Human_NA12878	ABC12		2006-08-19	AF	47847900	e1	WGA
		HWWAP19696		R	45174466	http://lgt.igs.umaryland.edu/traces/45174466_HWWAP19696.html	http://trace.ncbi.nlm.nih.gov/Traces/trace.cgi?&cmd=retrieve&val=TRACE_NAME='45174466' and TEMPLATE_ID='HWWAP19696'&dopt=trace&size=1&seeas=Show	Acidovorax	224	4e-88		BCM	HWWA	HWWAP	611115	2003-01-13	swd	HWWAP1E19600
		165729_ABC7_000042509500_I6	165729_ABC7_000042509500_I6	R	60472241	http://lgt.igs.umaryland.edu/traces/60472241_165729_ABC7_000042509500_I6.html	http://trace.ncbi.nlm.nih.gov/Traces/trace.cgi?&cmd=retrieve&val=TRACE_NAME='60472241' and TEMPLATE_ID='165729_ABC7_000042509500_I6'&dopt=trace&size=1&seeas=Show	Acidovorax	143	2e-46	NA18517	ABC	Human_NA18517	ABC7		2005-09-23	AD	42965100	i6	WGA
		170143_ABC8_4_1_000041184500_C21	170143_ABC8_4_1_000041184500_C21	F	68710376	http://lgt.igs.umaryland.edu/traces/68710376_170143_ABC8_4_1_000041184500_C21.html	http://trace.ncbi.nlm.nih.gov/Traces/trace.cgi?&cmd=retrieve&val=TRACE_NAME='68710376' and TEMPLATE_ID='170143_ABC8_4_1_000041184500_C21'&dopt=trace&size=1&seeas=Show	Acidovorax	162	5e-77	NA18507	ABC	Human_NA18507	ABC8_4_1		2006-01-25	ZM	44999600	c21	WGA
		168825_ABC8_4_1_000041146000_O21	168825_ABC8_4_1_000041146000_O21	R	68012668	http://lgt.igs.umaryland.edu/traces/68012668_168825_ABC8_4_1_000041146000_O21.html	http://trace.ncbi.nlm.nih.gov/Traces/trace.cgi?&cmd=retrieve&val=TRACE_NAME='68012668' and TEMPLATE_ID='168825_ABC8_4_1_000041146000_O21'&dopt=trace&size=1&seeas=Show	Acidovorax	109	2e-52	NA18507	ABC	Human_NA18507	ABC8_4_1		2006-01-16	ZG	45723400	o21	WGA
		170143_ABC8_4_1_000041190300_O17	170143_ABC8_4_1_000041190300_O17	R	68798820	http://lgt.igs.umaryland.edu/traces/68798820_170143_ABC8_4_1_000041190300_O17.html	http://trace.ncbi.nlm.nih.gov/Traces/trace.cgi?&cmd=retrieve&val=TRACE_NAME='68798820' and TEMPLATE_ID='170143_ABC8_4_1_000041190300_O17'&dopt=trace&size=1&seeas=Show	Acidovorax	112	3e-54	NA18507	ABC	Human_NA18507	ABC8_4_1		2006-01-26	AB	45814600	o17	WGA
		168825_ABC8_4_1_000041132000_K18	168825_ABC8_4_1_000041132000_K18	R	67880784	http://lgt.igs.umaryland.edu/traces/67880784_168825_ABC8_4_1_000041132000_K18.html	http://trace.ncbi.nlm.nih.gov/Traces/trace.cgi?&cmd=retrieve&val=TRACE_NAME='67880784' and TEMPLATE_ID='168825_ABC8_4_1_000041132000_K18'&dopt=trace&size=1&seeas=Show	Acidovorax	222	2e-110	NA18507	ABC	Human_NA18507	ABC8_4_1		2006-01-14	ZQ	45682100	k18	WGA
		170143_ABC8_4_1_000041209900_J19	170143_ABC8_4_1_000041209900_J19	R	69221277	http://lgt.igs.umaryland.edu/traces/69221277_170143_ABC8_4_1_000041209900_J19.html	http://trace.ncbi.nlm.nih.gov/Traces/trace.cgi?&cmd=retrieve&val=TRACE_NAME='69221277' and TEMPLATE_ID='170143_ABC8_4_1_000041209900_J19'&dopt=trace&size=1&seeas=Show	Acidovorax	521	0	NA18507	ABC	Human_NA18507	ABC8_4_1		2006-01-31	ZF	45855900	j19	WGA
		170143_ABC8_4_1_000043770600_K3	170143_ABC8_4_1_000043770600_K3	F	68495564	http://lgt.igs.umaryland.edu/traces/68495564_170143_ABC8_4_1_000043770600_K3.html	http://trace.ncbi.nlm.nih.gov/Traces/trace.cgi?&cmd=retrieve&val=TRACE_NAME='68495564' and TEMPLATE_ID='170143_ABC8_4_1_000043770600_K3'&dopt=trace&size=1&seeas=Show	Acidovorax	161	4e-81	NA18507	ABC	Human_NA18507	ABC8_4_1		2006-01-22	ZM	45771000	k3	WGA
		170143_ABC8_4_1_000041168100_M2	170143_ABC8_4_1_000041168100_M2	R	68470011	http://lgt.igs.umaryland.edu/traces/68470011_170143_ABC8_4_1_000041168100_M2.html	http://trace.ncbi.nlm.nih.gov/Traces/trace.cgi?&cmd=retrieve&val=TRACE_NAME='68470011' and TEMPLATE_ID='170143_ABC8_4_1_000041168100_M2'&dopt=trace&size=1&seeas=Show	Acidovorax	193	1e-90	NA18507	ABC	Human_NA18507	ABC8_4_1		2006-01-22	ZC	45003300	m2	WGA
		168825_ABC8_4_1_000041136300_D13	168825_ABC8_4_1_000041136300_D13	F	67890217	http://lgt.igs.umaryland.edu/traces/67890217_168825_ABC8_4_1_000041136300_D13.html	http://trace.ncbi.nlm.nih.gov/Traces/trace.cgi?&cmd=retrieve&val=TRACE_NAME='67890217' and TEMPLATE_ID='168825_ABC8_4_1_000041136300_D13'&dopt=trace&size=1&seeas=Show	Acidovorax	138	9e-58	NA18507	ABC	Human_NA18507	ABC8_4_1		2006-01-13	ZY	45688600	d13	WGA
		168825_ABC8_4_1_000043743400_J4	168825_ABC8_4_1_000043743400_J4	R	68235837	http://lgt.igs.umaryland.edu/traces/68235837_168825_ABC8_4_1_000043743400_J4.html	http://trace.ncbi.nlm.nih.gov/Traces/trace.cgi?&cmd=retrieve&val=TRACE_NAME='68235837' and TEMPLATE_ID='168825_ABC8_4_1_000043743400_J4'&dopt=trace&size=1&seeas=Show	Acidovorax	143	1e-65	NA18507	ABC	Human_NA18507	ABC8_4_1		2006-01-19	ZE	45749300	j4	WGA
		170143_ABC8_4_1_000041179800_J4	170143_ABC8_4_1_000041179800_J4	R	68633078	http://lgt.igs.umaryland.edu/traces/68633078_170143_ABC8_4_1_000041179800_J4.html	http://trace.ncbi.nlm.nih.gov/Traces/trace.cgi?&cmd=retrieve&val=TRACE_NAME='68633078' and TEMPLATE_ID='170143_ABC8_4_1_000041179800_J4'&dopt=trace&size=1&seeas=Show	Acidovorax	317	5e-167	NA18507	ABC	Human_NA18507	ABC8_4_1		2006-01-23	ZK	45785800	j4	WGA
		172343_ABC9_3_5_000045364400_H21	172343_ABC9_3_5_000045364400_H21	F	74931773	http://lgt.igs.umaryland.edu/traces/74931773_172343_ABC9_3_5_000045364400_H21.html	http://trace.ncbi.nlm.nih.gov/Traces/trace.cgi?&cmd=retrieve&val=TRACE_NAME='74931773' and TEMPLATE_ID='172343_ABC9_3_5_000045364400_H21'&dopt=trace&size=1&seeas=Show	Acidovorax	160	6e-59	NA18956	ABC	Human_NA18956	ABC9_3_5		2006-03-24	AA	45380700	h21	WGA
		172343_ABC9_3_5_000044034300_I9	172343_ABC9_3_5_000044034300_I9	F	75378168	http://lgt.igs.umaryland.edu/traces/75378168_172343_ABC9_3_5_000044034300_I9.html	http://trace.ncbi.nlm.nih.gov/Traces/trace.cgi?&cmd=retrieve&val=TRACE_NAME='75378168' and TEMPLATE_ID='172343_ABC9_3_5_000044034300_I9'&dopt=trace&size=1&seeas=Show	Acidovorax	130	3e-48	NA18956	ABC	Human_NA18956	ABC9_3_5		2006-03-27	AL	45458900	i9	WGA
		172343_ABC9_3_5_000044042500_L11	172343_ABC9_3_5_000044042500_L11	R	75445647	http://lgt.igs.umaryland.edu/traces/75445647_172343_ABC9_3_5_000044042500_L11.html	http://trace.ncbi.nlm.nih.gov/Traces/trace.cgi?&cmd=retrieve&val=TRACE_NAME='75445647' and TEMPLATE_ID='172343_ABC9_3_5_000044042500_L11'&dopt=trace&size=1&seeas=Show	Acidovorax	124	5e-59	NA18956	ABC	Human_NA18956	ABC9_3_5		2006-03-28	ZQ	43304400	l11	WGA
		172343_ABC9_3_5_000044031200_H16	172343_ABC9_3_5_000044031200_H16	R	75193633	http://lgt.igs.umaryland.edu/traces/75193633_172343_ABC9_3_5_000044031200_H16.html	http://trace.ncbi.nlm.nih.gov/Traces/trace.cgi?&cmd=retrieve&val=TRACE_NAME='75193633' and TEMPLATE_ID='172343_ABC9_3_5_000044031200_H16'&dopt=trace&size=1&seeas=Show	Acidovorax	252	2e-123	NA18956	ABC	Human_NA18956	ABC9_3_5		2006-03-26	AL	45435600	h16	WGA
		172343_ABC9_3_5_000043349900_C1	172343_ABC9_3_5_000043349900_C1	R	75777755	http://lgt.igs.umaryland.edu/traces/75777755_172343_ABC9_3_5_000043349900_C1.html	http://trace.ncbi.nlm.nih.gov/Traces/trace.cgi?&cmd=retrieve&val=TRACE_NAME='75777755' and TEMPLATE_ID='172343_ABC9_3_5_000043349900_C1'&dopt=trace&size=1&seeas=Show	Acidovorax	106	1e-50	NA18956	ABC	Human_NA18956	ABC9_3_5		2006-03-31	ZY	43377700	c1	WGA
		172343_ABC9_3_5_000045486000_E18	172343_ABC9_3_5_000045486000_E18	F	75894810	http://lgt.igs.umaryland.edu/traces/75894810_172343_ABC9_3_5_000045486000_E18.html	http://trace.ncbi.nlm.nih.gov/Traces/trace.cgi?&cmd=retrieve&val=TRACE_NAME='75894810' and TEMPLATE_ID='172343_ABC9_3_5_000045486000_E18'&dopt=trace&size=1&seeas=Show	Acidovorax	277	2e-102	NA18956	ABC	Human_NA18956	ABC9_3_5		2006-04-02	ZS	43387500	e18	WGA
		172343_ABC9_3_5_000043323700_K24	172343_ABC9_3_5_000043323700_K24	R	75648351	http://lgt.igs.umaryland.edu/traces/75648351_172343_ABC9_3_5_000043323700_K24.html	http://trace.ncbi.nlm.nih.gov/Traces/trace.cgi?&cmd=retrieve&val=TRACE_NAME='75648351' and TEMPLATE_ID='172343_ABC9_3_5_000043323700_K24'&dopt=trace&size=1&seeas=Show	Acidovorax	128	7e-64	NA18956	ABC	Human_NA18956	ABC9_3_5		2006-03-30	ZQ	43344100	k24	WGA
		171417_ABC10_2_1_000044462100_K17	171417_ABC10_2_1_000044462100_K17	F	77466039	http://lgt.igs.umaryland.edu/traces/77466039_171417_ABC10_2_1_000044462100_K17.html	http://trace.ncbi.nlm.nih.gov/Traces/trace.cgi?&cmd=retrieve&val=TRACE_NAME='77466039' and TEMPLATE_ID='171417_ABC10_2_1_000044462100_K17'&dopt=trace&size=1&seeas=Show	Acidovorax	266	6e-142	NA19240	ABC	Human_NA19240	ABC10_2_1		2006-04-16	AJ	43338000	k17	WGA
		172343_ABC9_3_5_000044006100_J19	172343_ABC9_3_5_000044006100_J19	F	74986832	http://lgt.igs.umaryland.edu/traces/74986832_172343_ABC9_3_5_000044006100_J19.html	http://trace.ncbi.nlm.nih.gov/Traces/trace.cgi?&cmd=retrieve&val=TRACE_NAME='74986832' and TEMPLATE_ID='172343_ABC9_3_5_000044006100_J19'&dopt=trace&size=1&seeas=Show	Acidovorax	246	8e-132	NA18956	ABC	Human_NA18956	ABC9_3_5		2006-03-25	ZM	45355000	j19	WGA
		172343_ABC9_3_5_000045391500_K22	172343_ABC9_3_5_000045391500_K22	R	75127271	http://lgt.igs.umaryland.edu/traces/75127271_172343_ABC9_3_5_000045391500_K22.html	http://trace.ncbi.nlm.nih.gov/Traces/trace.cgi?&cmd=retrieve&val=TRACE_NAME='75127271' and TEMPLATE_ID='172343_ABC9_3_5_000045391500_K22'&dopt=trace&size=1&seeas=Show	Acidovorax	165	3e-81	NA18956	ABC	Human_NA18956	ABC9_3_5		2006-03-26	ZR	45405800	k22	WGA
		171417_ABC10_2_1_000044462100_I20	171417_ABC10_2_1_000044462100_I20	F	77470544	http://lgt.igs.umaryland.edu/traces/77470544_171417_ABC10_2_1_000044462100_I20.html	http://trace.ncbi.nlm.nih.gov/Traces/trace.cgi?&cmd=retrieve&val=TRACE_NAME='77470544' and TEMPLATE_ID='171417_ABC10_2_1_000044462100_I20'&dopt=trace&size=1&seeas=Show	Acidovorax	260	3e-85	NA19240	ABC	Human_NA19240	ABC10_2_1		2006-04-16	ZU	43571300	i20	WGA
		171417_ABC10_2_1_000045509300_G18	171417_ABC10_2_1_000045509300_G18	R	76388825	http://lgt.igs.umaryland.edu/traces/76388825_171417_ABC10_2_1_000045509300_G18.html	http://trace.ncbi.nlm.nih.gov/Traces/trace.cgi?&cmd=retrieve&val=TRACE_NAME='76388825' and TEMPLATE_ID='171417_ABC10_2_1_000045509300_G18'&dopt=trace&size=1&seeas=Show	Acidovorax	452	1e-142	NA19240	ABC	Human_NA19240	ABC10_2_1		2006-04-06	ZD	43419800	g18	WGA
		171417_ABC10_2_1_000045525100_I20	171417_ABC10_2_1_000045525100_I20	R	76586192	http://lgt.igs.umaryland.edu/traces/76586192_171417_ABC10_2_1_000045525100_I20.html	http://trace.ncbi.nlm.nih.gov/Traces/trace.cgi?&cmd=retrieve&val=TRACE_NAME='76586192' and TEMPLATE_ID='171417_ABC10_2_1_000045525100_I20'&dopt=trace&size=1&seeas=Show	Acidovorax	261	2e-138	NA19240	ABC	Human_NA19240	ABC10_2_1		2006-04-08	ZX	43465200	i20	WGA
		171417_ABC10_2_1_000045540100_N5	171417_ABC10_2_1_000045540100_N5	R	77145446	http://lgt.igs.umaryland.edu/traces/77145446_171417_ABC10_2_1_000045540100_N5.html	http://trace.ncbi.nlm.nih.gov/Traces/trace.cgi?&cmd=retrieve&val=TRACE_NAME='77145446' and TEMPLATE_ID='171417_ABC10_2_1_000045540100_N5'&dopt=trace&size=1&seeas=Show	Acidovorax	280	1e-75	NA19240	ABC	Human_NA19240	ABC10_2_1		2006-04-13	AH	43499700	n5	WGA
		172343_ABC9_3_5_000044000700_B20	172343_ABC9_3_5_000044000700_B20	R	74648584	http://lgt.igs.umaryland.edu/traces/74648584_172343_ABC9_3_5_000044000700_B20.html	http://trace.ncbi.nlm.nih.gov/Traces/trace.cgi?&cmd=retrieve&val=TRACE_NAME='74648584' and TEMPLATE_ID='172343_ABC9_3_5_000044000700_B20'&dopt=trace&size=1&seeas=Show	Acidovorax	127	1e-39	NA18956	ABC	Human_NA18956	ABC9_3_5		2006-03-22	ZJ	45982000	b20	WGA
		172343_ABC9_3_5_000044034900_C12	172343_ABC9_3_5_000044034900_C12	R	75339571	http://lgt.igs.umaryland.edu/traces/75339571_172343_ABC9_3_5_000044034900_C12.html	http://trace.ncbi.nlm.nih.gov/Traces/trace.cgi?&cmd=retrieve&val=TRACE_NAME='75339571' and TEMPLATE_ID='172343_ABC9_3_5_000044034900_C12'&dopt=trace&size=1&seeas=Show	Acidovorax	361	4e-112	NA18956	ABC	Human_NA18956	ABC9_3_5		2006-03-28	ZS	45462200	c12	WGA
		166205_ABC8_000043033900_O14	166205_ABC8_000043033900_O14	R	61796984	http://lgt.igs.umaryland.edu/traces/61796984_166205_ABC8_000043033900_O14.html	http://trace.ncbi.nlm.nih.gov/Traces/trace.cgi?&cmd=retrieve&val=TRACE_NAME='61796984' and TEMPLATE_ID='166205_ABC8_000043033900_O14'&dopt=trace&size=1&seeas=Show	Acidovorax	369	0	NA18507	ABC	Human_NA18507	ABC8		2005-10-05	ZP	42681200	o14	WGA
		168825_ABC8_4_1_000041097400_A5	168825_ABC8_4_1_000041097400_A5	R	67211419	http://lgt.igs.umaryland.edu/traces/67211419_168825_ABC8_4_1_000041097400_A5.html	http://trace.ncbi.nlm.nih.gov/Traces/trace.cgi?&cmd=retrieve&val=TRACE_NAME='67211419' and TEMPLATE_ID='168825_ABC8_4_1_000041097400_A5'&dopt=trace&size=1&seeas=Show	Acidovorax	107	2e-39	NA18507	ABC	Human_NA18507	ABC8_4_1		2006-01-05	ZV	43712000	a5	WGA
		168825_ABC8_4_1_000000754022_P23	168825_ABC8_4_1_000000754022_P23	F	66941120	http://lgt.igs.umaryland.edu/traces/66941120_168825_ABC8_4_1_000000754022_P23.html	http://trace.ncbi.nlm.nih.gov/Traces/trace.cgi?&cmd=retrieve&val=TRACE_NAME='66941120' and TEMPLATE_ID='168825_ABC8_4_1_000000754022_P23'&dopt=trace&size=1&seeas=Show	Acidovorax	272	3e-140	NA18507	ABC	Human_NA18507	ABC8_4_1		2005-12-30	ZK	800222	p23	WGA
		168825_ABC8_4_1_000041100100_H24	168825_ABC8_4_1_000041100100_H24	F	67583758	http://lgt.igs.umaryland.edu/traces/67583758_168825_ABC8_4_1_000041100100_H24.html	http://trace.ncbi.nlm.nih.gov/Traces/trace.cgi?&cmd=retrieve&val=TRACE_NAME='67583758' and TEMPLATE_ID='168825_ABC8_4_1_000041100100_H24'&dopt=trace&size=1&seeas=Show	Acidovorax	208	2e-104	NA18507	ABC	Human_NA18507	ABC8_4_1		2006-01-09	AG	45642500	h24	WGA
		173650_ABC10_2_1_000044139500_J16	173650_ABC10_2_1_000044139500_J16	F	78201563	http://lgt.igs.umaryland.edu/traces/78201563_173650_ABC10_2_1_000044139500_J16.html	http://trace.ncbi.nlm.nih.gov/Traces/trace.cgi?&cmd=retrieve&val=TRACE_NAME='78201563' and TEMPLATE_ID='173650_ABC10_2_1_000044139500_J16'&dopt=trace&size=1&seeas=Show	Acidovorax	543	0	NA19240	ABC	Human_NA19240	ABC10_2_1		2006-04-24	ZS	44215100	j16	WGA
		173650_ABC10_2_1_000044140800_D7	173650_ABC10_2_1_000044140800_D7	F	78214078	http://lgt.igs.umaryland.edu/traces/78214078_173650_ABC10_2_1_000044140800_D7.html	http://trace.ncbi.nlm.nih.gov/Traces/trace.cgi?&cmd=retrieve&val=TRACE_NAME='78214078' and TEMPLATE_ID='173650_ABC10_2_1_000044140800_D7'&dopt=trace&size=1&seeas=Show	Acidovorax	286	6e-151	NA19240	ABC	Human_NA19240	ABC10_2_1		2006-04-24	AF	44208800	d7	WGA
		173650_ABC10_2_1_000044147700_M21	173650_ABC10_2_1_000044147700_M21	R	78248577	http://lgt.igs.umaryland.edu/traces/78248577_173650_ABC10_2_1_000044147700_M21.html	http://trace.ncbi.nlm.nih.gov/Traces/trace.cgi?&cmd=retrieve&val=TRACE_NAME='78248577' and TEMPLATE_ID='173650_ABC10_2_1_000044147700_M21'&dopt=trace&size=1&seeas=Show	Acidovorax	101	3e-45	NA19240	ABC	Human_NA19240	ABC10_2_1		2006-04-25	AC	44223500	m21	WGA
		H_HD-1949B23	ABC18-1949B23	R	H_HD-1949B23.g1	http://lgt.igs.umaryland.edu/traces/H_HD-1949B23.g1_H_HD-1949B23.html	http://trace.ncbi.nlm.nih.gov/Traces/trace.cgi?&cmd=retrieve&val=TRACE_NAME='H_HD-1949B23.g1' and TEMPLATE_ID='H_HD-1949B23'&dopt=trace&size=1&seeas=Show	Acidovorax	152	2e-42		WUGSC	H_HD-08-10-06	2181626703	0j00gy	2008-10-05	895	2h0aLJ	b23	CloneEnd
		HDICP1278	RP11-144C15	R	HDICP1E1278A	http://lgt.igs.umaryland.edu/traces/HDICP1E1278A_HDICP1278.html	http://trace.ncbi.nlm.nih.gov/Traces/trace.cgi?&cmd=retrieve&val=TRACE_NAME='HDICP1E1278A' and TEMPLATE_ID='HDICP1278'&dopt=trace&size=1&seeas=Show	Acidovorax	315	6e-173		BCM	HDIC		378082	2002-04-09	swz	HDICP1E1200
		1201894_ABC11_2_1_000049614600_L16	1201894_ABC11_2_1_000049614600_L16	R	97370290	http://lgt.igs.umaryland.edu/traces/97370290_1201894_ABC11_2_1_000049614600_L16.html	http://trace.ncbi.nlm.nih.gov/Traces/trace.cgi?&cmd=retrieve&val=TRACE_NAME='97370290' and TEMPLATE_ID='1201894_ABC11_2_1_000049614600_L16'&dopt=trace&size=1&seeas=Show	Acidovorax	188	3e-85	NA18555	ABC	Human_NA18555	ABC11_2_1		2006-11-15	AK	49585300	l16	WGA
		166863_ABC7_000042753600_H18	166863_ABC7_000042753600_H18	F	62628430	http://lgt.igs.umaryland.edu/traces/62628430_166863_ABC7_000042753600_H18.html	http://trace.ncbi.nlm.nih.gov/Traces/trace.cgi?&cmd=retrieve&val=TRACE_NAME='62628430' and TEMPLATE_ID='166863_ABC7_000042753600_H18'&dopt=trace&size=1&seeas=Show	Acidovorax	240	6e-126	NA18517	ABC	Human_NA18517	ABC7		2005-10-21	ZQ	42022300	h18	WGA
		165936_ABC8_000042548000_I16	165936_ABC8_000042548000_I16	R	61318381	http://lgt.igs.umaryland.edu/traces/61318381_165936_ABC8_000042548000_I16.html	http://trace.ncbi.nlm.nih.gov/Traces/trace.cgi?&cmd=retrieve&val=TRACE_NAME='61318381' and TEMPLATE_ID='165936_ABC8_000042548000_I16'&dopt=trace&size=1&seeas=Show	Acidovorax	342	1e-152	NA18507	ABC	Human_NA18507	ABC8		2005-09-27	ZP	42571800	i16	WGA
		166941_ABC7_000043090500_I21	166941_ABC7_000043090500_I21	R	62706775	http://lgt.igs.umaryland.edu/traces/62706775_166941_ABC7_000043090500_I21.html	http://trace.ncbi.nlm.nih.gov/Traces/trace.cgi?&cmd=retrieve&val=TRACE_NAME='62706775' and TEMPLATE_ID='166941_ABC7_000043090500_I21'&dopt=trace&size=1&seeas=Show	Acidovorax	242	8e-70	NA18517	ABC	Human_NA18517	ABC7		2005-10-22	ZA	42045500	i21	WGA
		166020_ABC8_000043014300_N9	166020_ABC8_000043014300_N9	F	61474409	http://lgt.igs.umaryland.edu/traces/61474409_166020_ABC8_000043014300_N9.html	http://trace.ncbi.nlm.nih.gov/Traces/trace.cgi?&cmd=retrieve&val=TRACE_NAME='61474409' and TEMPLATE_ID='166020_ABC8_000043014300_N9'&dopt=trace&size=1&seeas=Show	Acidovorax	125	2e-57	NA18507	ABC	Human_NA18507	ABC8		2005-09-30	ZC	42617600	n9	WGA
		166692_ABC7_000042056800_E15	166692_ABC7_000042056800_E15	F	62879491	http://lgt.igs.umaryland.edu/traces/62879491_166692_ABC7_000042056800_E15.html	http://trace.ncbi.nlm.nih.gov/Traces/trace.cgi?&cmd=retrieve&val=TRACE_NAME='62879491' and TEMPLATE_ID='166692_ABC7_000042056800_E15'&dopt=trace&size=1&seeas=Show	Acidovorax	308	3e-159	NA18517	ABC	Human_NA18517	ABC7		2005-10-26	ZB	43133900	e15	WGA
		166640_ABC7_000042757600_N13	166640_ABC7_000042757600_N13	R	62760949	http://lgt.igs.umaryland.edu/traces/62760949_166640_ABC7_000042757600_N13.html	http://trace.ncbi.nlm.nih.gov/Traces/trace.cgi?&cmd=retrieve&val=TRACE_NAME='62760949' and TEMPLATE_ID='166640_ABC7_000042757600_N13'&dopt=trace&size=1&seeas=Show	Acidovorax	159	7e-80	NA18517	ABC	Human_NA18517	ABC7		2005-10-23	ZM	42793500	n13	WGA
		170215_ABC9_3_2_000043867600_E6	170215_ABC9_3_2_000043867600_E6	F	71651273	http://lgt.igs.umaryland.edu/traces/71651273_170215_ABC9_3_2_000043867600_E6.html	http://trace.ncbi.nlm.nih.gov/Traces/trace.cgi?&cmd=retrieve&val=TRACE_NAME='71651273' and TEMPLATE_ID='170215_ABC9_3_2_000043867600_E6'&dopt=trace&size=1&seeas=Show	Acidovorax	124	2e-42	NA18956	ABC	Human_NA18956	ABC9_3_2		2006-02-24	ZK	45215300	e6	WGA
		170215_ABC9_3_2_000043857000_B19	170215_ABC9_3_2_000043857000_B19	F	71748659	http://lgt.igs.umaryland.edu/traces/71748659_170215_ABC9_3_2_000043857000_B19.html	http://trace.ncbi.nlm.nih.gov/Traces/trace.cgi?&cmd=retrieve&val=TRACE_NAME='71748659' and TEMPLATE_ID='170215_ABC9_3_2_000043857000_B19'&dopt=trace&size=1&seeas=Show	Acidovorax	281	6e-43	NA18956	ABC	Human_NA18956	ABC9_3_2		2006-02-25	ZC	45228400	b19	WGA
		170215_ABC9_3_2_000043831900_F3	170215_ABC9_3_2_000043831900_F3	R	71233201	http://lgt.igs.umaryland.edu/traces/71233201_170215_ABC9_3_2_000043831900_F3.html	http://trace.ncbi.nlm.nih.gov/Traces/trace.cgi?&cmd=retrieve&val=TRACE_NAME='71233201' and TEMPLATE_ID='170215_ABC9_3_2_000043831900_F3'&dopt=trace&size=1&seeas=Show	Acidovorax	134	3e-60	NA18956	ABC	Human_NA18956	ABC9_3_2		2006-02-20	ZC	45159500	f3	WGA
		170215_ABC9_3_2_000041243900_O19	170215_ABC9_3_2_000041243900_O19	R	70139116	http://lgt.igs.umaryland.edu/traces/70139116_170215_ABC9_3_2_000041243900_O19.html	http://trace.ncbi.nlm.nih.gov/Traces/trace.cgi?&cmd=retrieve&val=TRACE_NAME='70139116' and TEMPLATE_ID='170215_ABC9_3_2_000041243900_O19'&dopt=trace&size=1&seeas=Show	Acidovorax	154	7e-77	NA18956	ABC	Human_NA18956	ABC9_3_2		2006-02-09	ZR	45052200	o19	WGA
		170215_ABC9_3_2_000043829600_C1	170215_ABC9_3_2_000043829600_C1	R	71175322	http://lgt.igs.umaryland.edu/traces/71175322_170215_ABC9_3_2_000043829600_C1.html	http://trace.ncbi.nlm.nih.gov/Traces/trace.cgi?&cmd=retrieve&val=TRACE_NAME='71175322' and TEMPLATE_ID='170215_ABC9_3_2_000043829600_C1'&dopt=trace&size=1&seeas=Show	Acidovorax	108	1e-37	NA18956	ABC	Human_NA18956	ABC9_3_2		2006-02-19	ZW	45160700	c1	WGA
		170215_ABC9_3_2_000041267100_M10	170215_ABC9_3_2_000041267100_M10	R	70419093	http://lgt.igs.umaryland.edu/traces/70419093_170215_ABC9_3_2_000041267100_M10.html	http://trace.ncbi.nlm.nih.gov/Traces/trace.cgi?&cmd=retrieve&val=TRACE_NAME='70419093' and TEMPLATE_ID='170215_ABC9_3_2_000041267100_M10'&dopt=trace&size=1&seeas=Show	Acidovorax	154	7e-77	NA18956	ABC	Human_NA18956	ABC9_3_2		2006-02-11	ZX	45087500	m10	WGA
		170215_ABC9_3_2_000045923400_F24	170215_ABC9_3_2_000045923400_F24	F	71020577	http://lgt.igs.umaryland.edu/traces/71020577_170215_ABC9_3_2_000045923400_F24.html	http://trace.ncbi.nlm.nih.gov/Traces/trace.cgi?&cmd=retrieve&val=TRACE_NAME='71020577' and TEMPLATE_ID='170215_ABC9_3_2_000045923400_F24'&dopt=trace&size=1&seeas=Show	Acidovorax	170	4e-84	NA18956	ABC	Human_NA18956	ABC9_3_2		2006-02-17	ZP	45928700	f24	WGA
		170215_ABC9_3_2_000043874000_E8	170215_ABC9_3_2_000043874000_E8	F	71690817	http://lgt.igs.umaryland.edu/traces/71690817_170215_ABC9_3_2_000043874000_E8.html	http://trace.ncbi.nlm.nih.gov/Traces/trace.cgi?&cmd=retrieve&val=TRACE_NAME='71690817' and TEMPLATE_ID='170215_ABC9_3_2_000043874000_E8'&dopt=trace&size=1&seeas=Show	Acidovorax	127	8e-49	NA18956	ABC	Human_NA18956	ABC9_3_2		2006-02-25	ZY	45231400	e8	WGA
		170215_ABC9_3_2_000043880100_H23	170215_ABC9_3_2_000043880100_H23	R	72062987	http://lgt.igs.umaryland.edu/traces/72062987_170215_ABC9_3_2_000043880100_H23.html	http://trace.ncbi.nlm.nih.gov/Traces/trace.cgi?&cmd=retrieve&val=TRACE_NAME='72062987' and TEMPLATE_ID='170215_ABC9_3_2_000043880100_H23'&dopt=trace&size=1&seeas=Show	Acidovorax	104	4e-47	NA18956	ABC	Human_NA18956	ABC9_3_2		2006-02-28	AE	46031400	h23	WGA
		170215_ABC9_3_2_000041262500_E18	170215_ABC9_3_2_000041262500_E18	F	70315289	http://lgt.igs.umaryland.edu/traces/70315289_170215_ABC9_3_2_000041262500_E18.html	http://trace.ncbi.nlm.nih.gov/Traces/trace.cgi?&cmd=retrieve&val=TRACE_NAME='70315289' and TEMPLATE_ID='170215_ABC9_3_2_000041262500_E18'&dopt=trace&size=1&seeas=Show	Acidovorax	152	9e-76	NA18956	ABC	Human_NA18956	ABC9_3_2		2006-02-11	AC	45068600	e18	WGA
		170215_ABC9_3_2_000043858900_J4	170215_ABC9_3_2_000043858900_J4	F	71631791	http://lgt.igs.umaryland.edu/traces/71631791_170215_ABC9_3_2_000043858900_J4.html	http://trace.ncbi.nlm.nih.gov/Traces/trace.cgi?&cmd=retrieve&val=TRACE_NAME='71631791' and TEMPLATE_ID='170215_ABC9_3_2_000043858900_J4'&dopt=trace&size=1&seeas=Show	Acidovorax	156	1e-80	NA18956	ABC	Human_NA18956	ABC9_3_2		2006-02-24	ZB	45167500	j4	WGA
		170215_ABC9_3_2_000041271900_C6	170215_ABC9_3_2_000041271900_C6	R	70444650	http://lgt.igs.umaryland.edu/traces/70444650_170215_ABC9_3_2_000041271900_C6.html	http://trace.ncbi.nlm.nih.gov/Traces/trace.cgi?&cmd=retrieve&val=TRACE_NAME='70444650' and TEMPLATE_ID='170215_ABC9_3_2_000041271900_C6'&dopt=trace&size=1&seeas=Show	Acidovorax	127	7e-61	NA18956	ABC	Human_NA18956	ABC9_3_2		2006-02-12	ZQ	45089000	c6	WGA
		170143_ABC8_4_1_000041223900_L6	170143_ABC8_4_1_000041223900_L6	F	69690854	http://lgt.igs.umaryland.edu/traces/69690854_170143_ABC8_4_1_000041223900_L6.html	http://trace.ncbi.nlm.nih.gov/Traces/trace.cgi?&cmd=retrieve&val=TRACE_NAME='69690854' and TEMPLATE_ID='170143_ABC8_4_1_000041223900_L6'&dopt=trace&size=1&seeas=Show	Acidovorax	315	2e-175	NA18507	ABC	Human_NA18507	ABC8_4_1		2006-02-06	ZP	45869200	l6	WGA
		170215_ABC9_3_2_000043826300_I12	170215_ABC9_3_2_000043826300_I12	R	71172303	http://lgt.igs.umaryland.edu/traces/71172303_170215_ABC9_3_2_000043826300_I12.html	http://trace.ncbi.nlm.nih.gov/Traces/trace.cgi?&cmd=retrieve&val=TRACE_NAME='71172303' and TEMPLATE_ID='170215_ABC9_3_2_000043826300_I12'&dopt=trace&size=1&seeas=Show	Acidovorax	117	7e-43	NA18956	ABC	Human_NA18956	ABC9_3_2		2006-02-19	ZS	45145200	i12	WGA
		170215_ABC9_3_2_000043816800_H1	170215_ABC9_3_2_000043816800_H1	R	71240838	http://lgt.igs.umaryland.edu/traces/71240838_170215_ABC9_3_2_000043816800_H1.html	http://trace.ncbi.nlm.nih.gov/Traces/trace.cgi?&cmd=retrieve&val=TRACE_NAME='71240838' and TEMPLATE_ID='170215_ABC9_3_2_000043816800_H1'&dopt=trace&size=1&seeas=Show	Acidovorax	227	4e-118	NA18956	ABC	Human_NA18956	ABC9_3_2		2006-02-19	ZG	45941600	h1	WGA
		170215_ABC9_3_2_000041283800_F14	170215_ABC9_3_2_000041283800_F14	R	70557417	http://lgt.igs.umaryland.edu/traces/70557417_170215_ABC9_3_2_000041283800_F14.html	http://trace.ncbi.nlm.nih.gov/Traces/trace.cgi?&cmd=retrieve&val=TRACE_NAME='70557417' and TEMPLATE_ID='170215_ABC9_3_2_000041283800_F14'&dopt=trace&size=1&seeas=Show	Acidovorax	210	1e-105	NA18956	ABC	Human_NA18956	ABC9_3_2		2006-02-13	AD	45109300	f14	WGA
		170646_ABC8_4_1_2_000041222000_D17	170646_ABC8_4_1_2_000041222000_D17	F	69773741	http://lgt.igs.umaryland.edu/traces/69773741_170646_ABC8_4_1_2_000041222000_D17.html	http://trace.ncbi.nlm.nih.gov/Traces/trace.cgi?&cmd=retrieve&val=TRACE_NAME='69773741' and TEMPLATE_ID='170646_ABC8_4_1_2_000041222000_D17'&dopt=trace&size=1&seeas=Show	Acidovorax	268	8e-138	NA18507	ABC	Human_NA18507	ABC8_4_1_2		2006-02-04	ZJ	45874800	d17	WGA
		170215_ABC9_3_2_000043834400_A17	170215_ABC9_3_2_000043834400_A17	F	71301595	http://lgt.igs.umaryland.edu/traces/71301595_170215_ABC9_3_2_000043834400_A17.html	http://trace.ncbi.nlm.nih.gov/Traces/trace.cgi?&cmd=retrieve&val=TRACE_NAME='71301595' and TEMPLATE_ID='170215_ABC9_3_2_000043834400_A17'&dopt=trace&size=1&seeas=Show	Acidovorax	268	8e-138	NA18956	ABC	Human_NA18956	ABC9_3_2		2006-02-20	ZM	45943500	a17	WGA
		170215_ABC9_3_2_000043874500_J2	170215_ABC9_3_2_000043874500_J2	F	71685655	http://lgt.igs.umaryland.edu/traces/71685655_170215_ABC9_3_2_000043874500_J2.html	http://trace.ncbi.nlm.nih.gov/Traces/trace.cgi?&cmd=retrieve&val=TRACE_NAME='71685655' and TEMPLATE_ID='170215_ABC9_3_2_000043874500_J2'&dopt=trace&size=1&seeas=Show	Acidovorax	258	2e-114	NA18956	ABC	Human_NA18956	ABC9_3_2		2006-02-25	AD	45234700	j2	WGA
		170215_ABC9_3_2_000043835300_A7	170215_ABC9_3_2_000043835300_A7	R	71329695	http://lgt.igs.umaryland.edu/traces/71329695_170215_ABC9_3_2_000043835300_A7.html	http://trace.ncbi.nlm.nih.gov/Traces/trace.cgi?&cmd=retrieve&val=TRACE_NAME='71329695' and TEMPLATE_ID='170215_ABC9_3_2_000043835300_A7'&dopt=trace&size=1&seeas=Show	Acidovorax	328	5e-164	NA18956	ABC	Human_NA18956	ABC9_3_2		2006-02-20	AH	45139100	a7	WGA
		170215_ABC9_3_2_000041256900_N21	170215_ABC9_3_2_000041256900_N21	F	70351795	http://lgt.igs.umaryland.edu/traces/70351795_170215_ABC9_3_2_000041256900_N21.html	http://trace.ncbi.nlm.nih.gov/Traces/trace.cgi?&cmd=retrieve&val=TRACE_NAME='70351795' and TEMPLATE_ID='170215_ABC9_3_2_000041256900_N21'&dopt=trace&size=1&seeas=Show	Acidovorax	195	3e-94	NA18956	ABC	Human_NA18956	ABC9_3_2		2006-02-11	ZV	45072600	n21	WGA
		170143_ABC8_4_1_000045035200_J3	170143_ABC8_4_1_000045035200_J3	F	69390534	http://lgt.igs.umaryland.edu/traces/69390534_170143_ABC8_4_1_000045035200_J3.html	http://trace.ncbi.nlm.nih.gov/Traces/trace.cgi?&cmd=retrieve&val=TRACE_NAME='69390534' and TEMPLATE_ID='170143_ABC8_4_1_000045035200_J3'&dopt=trace&size=1&seeas=Show	Acidovorax	195	6e-99	NA18507	ABC	Human_NA18507	ABC8_4_1		2006-02-02	ZS	43801900	j3	WGA
		170215_ABC9_3_2_000043861600_C3	170215_ABC9_3_2_000043861600_C3	F	71565193	http://lgt.igs.umaryland.edu/traces/71565193_170215_ABC9_3_2_000043861600_C3.html	http://trace.ncbi.nlm.nih.gov/Traces/trace.cgi?&cmd=retrieve&val=TRACE_NAME='71565193' and TEMPLATE_ID='170215_ABC9_3_2_000043861600_C3'&dopt=trace&size=1&seeas=Show	Acidovorax	322	3e-165	NA18956	ABC	Human_NA18956	ABC9_3_2		2006-02-22	AE	45172900	c3	WGA
		170215_ABC9_3_2_000043831100_M5	170215_ABC9_3_2_000043831100_M5	F	71334278	http://lgt.igs.umaryland.edu/traces/71334278_170215_ABC9_3_2_000043831100_M5.html	http://trace.ncbi.nlm.nih.gov/Traces/trace.cgi?&cmd=retrieve&val=TRACE_NAME='71334278' and TEMPLATE_ID='170215_ABC9_3_2_000043831100_M5'&dopt=trace&size=1&seeas=Show	Acidovorax	180	1e-87	NA18956	ABC	Human_NA18956	ABC9_3_2		2006-02-20	ZQ	45939600	m5	WGA
		170215_ABC9_3_2_000041285400_B14	170215_ABC9_3_2_000041285400_B14	F	70749282	http://lgt.igs.umaryland.edu/traces/70749282_170215_ABC9_3_2_000041285400_B14.html	http://trace.ncbi.nlm.nih.gov/Traces/trace.cgi?&cmd=retrieve&val=TRACE_NAME='70749282' and TEMPLATE_ID='170215_ABC9_3_2_000041285400_B14'&dopt=trace&size=1&seeas=Show	Acidovorax	186	1e-93	NA18956	ABC	Human_NA18956	ABC9_3_2		2006-02-14	ZA	45121100	b14	WGA
		170215_ABC9_3_2_000045922000_D3	170215_ABC9_3_2_000045922000_D3	R	70841714	http://lgt.igs.umaryland.edu/traces/70841714_170215_ABC9_3_2_000045922000_D3.html	http://trace.ncbi.nlm.nih.gov/Traces/trace.cgi?&cmd=retrieve&val=TRACE_NAME='70841714' and TEMPLATE_ID='170215_ABC9_3_2_000045922000_D3'&dopt=trace&size=1&seeas=Show	Acidovorax	154	6e-77	NA18956	ABC	Human_NA18956	ABC9_3_2		2006-02-16	ZD	45127500	d3	WGA
		169789_ABC9_1_1_000005959449_M11	169789_ABC9_1_1_000005959449_M11	F	67980347	http://lgt.igs.umaryland.edu/traces/67980347_169789_ABC9_1_1_000005959449_M11.html	http://trace.ncbi.nlm.nih.gov/Traces/trace.cgi?&cmd=retrieve&val=TRACE_NAME='67980347' and TEMPLATE_ID='169789_ABC9_1_1_000005959449_M11'&dopt=trace&size=1&seeas=Show	Acidovorax	254	2e-110	NA18956	ABC	Human_NA18956	ABC9_1_1		2006-01-15	ZV	5960449	m11	WGA
		170215_ABC9_3_2_000043882700_D18	170215_ABC9_3_2_000043882700_D18	F	72051930	http://lgt.igs.umaryland.edu/traces/72051930_170215_ABC9_3_2_000043882700_D18.html	http://trace.ncbi.nlm.nih.gov/Traces/trace.cgi?&cmd=retrieve&val=TRACE_NAME='72051930' and TEMPLATE_ID='170215_ABC9_3_2_000043882700_D18'&dopt=trace&size=1&seeas=Show	Acidovorax	163	1e-65	NA18956	ABC	Human_NA18956	ABC9_3_2		2006-02-28	ZK	46027500	d18	WGA
		163285_ABC7_000040618700_C11	ABC7_000040618700_C11	F	56345634	http://lgt.igs.umaryland.edu/traces/56345634_163285_ABC7_000040618700_C11.html	http://trace.ncbi.nlm.nih.gov/Traces/trace.cgi?&cmd=retrieve&val=TRACE_NAME='56345634' and TEMPLATE_ID='163285_ABC7_000040618700_C11'&dopt=trace&size=1&seeas=Show	Acidovorax	108	2e-47	NA18517	ABC	Human_NA18517	ABC7		2005-08-02	ZK	41819800	c11	WGA
		163460_ABC7_000040592800_E21	ABC7_000040592800_E21	F	55045241	http://lgt.igs.umaryland.edu/traces/55045241_163460_ABC7_000040592800_E21.html	http://trace.ncbi.nlm.nih.gov/Traces/trace.cgi?&cmd=retrieve&val=TRACE_NAME='55045241' and TEMPLATE_ID='163460_ABC7_000040592800_E21'&dopt=trace&size=1&seeas=Show	Acidovorax	129	3e-57	NA18517	ABC	Human_NA18517	ABC7		2005-06-22	ZD	41715200	e21	WGA
		163285_ABC7_000040618700_E10	ABC7_000040618700_E10	F	56345621	http://lgt.igs.umaryland.edu/traces/56345621_163285_ABC7_000040618700_E10.html	http://trace.ncbi.nlm.nih.gov/Traces/trace.cgi?&cmd=retrieve&val=TRACE_NAME='56345621' and TEMPLATE_ID='163285_ABC7_000040618700_E10'&dopt=trace&size=1&seeas=Show	Acidovorax	442	0	NA18517	ABC	Human_NA18517	ABC7		2005-08-02	ZK	41819800	e10	WGA
		163460_ABC7_000040593400_E17	ABC7_000040593400_E17	R	55047673	http://lgt.igs.umaryland.edu/traces/55047673_163460_ABC7_000040593400_E17.html	http://trace.ncbi.nlm.nih.gov/Traces/trace.cgi?&cmd=retrieve&val=TRACE_NAME='55047673' and TEMPLATE_ID='163460_ABC7_000040593400_E17'&dopt=trace&size=1&seeas=Show	Acidovorax	100	6e-40	NA18517	ABC	Human_NA18517	ABC7		2005-06-22	AG	41715700	e17	WGA
		163285_ABC7_000040618900_E15	ABC7_000040618900_E15	F	56347621	http://lgt.igs.umaryland.edu/traces/56347621_163285_ABC7_000040618900_E15.html	http://trace.ncbi.nlm.nih.gov/Traces/trace.cgi?&cmd=retrieve&val=TRACE_NAME='56347621' and TEMPLATE_ID='163285_ABC7_000040618900_E15'&dopt=trace&size=1&seeas=Show	Acidovorax	204	8e-52	NA18517	ABC	Human_NA18517	ABC7		2005-08-02	ZL	41819000	e15	WGA
		164507_HUMAN_NA18517_FOSMID-014_J7	ABC7_000040621400_J7	F	57270731	http://lgt.igs.umaryland.edu/traces/57270731_164507_HUMAN_NA18517_FOSMID-014_J7.html	http://trace.ncbi.nlm.nih.gov/Traces/trace.cgi?&cmd=retrieve&val=TRACE_NAME='57270731' and TEMPLATE_ID='164507_HUMAN_NA18517_FOSMID-014_J7'&dopt=trace&size=1&seeas=Show	Acidovorax	185	5e-98	NA18517	ABC	Human_NA18517	Human_NA18517		2005-08-10	ZC	41831200	j7	WGA
		163722_ABC7_000040602300_I12	ABC7_000040602300_I12	F	55454385	http://lgt.igs.umaryland.edu/traces/55454385_163722_ABC7_000040602300_I12.html	http://trace.ncbi.nlm.nih.gov/Traces/trace.cgi?&cmd=retrieve&val=TRACE_NAME='55454385' and TEMPLATE_ID='163722_ABC7_000040602300_I12'&dopt=trace&size=1&seeas=Show	Acidovorax	238	3e-122	NA18517	ABC	Human_NA18517	ABC7		2005-07-09	ZX	41740200	i12	WGA
		163460_ABC7_000040595700_M7	ABC7_000040595700_M7	R	55072685	http://lgt.igs.umaryland.edu/traces/55072685_163460_ABC7_000040595700_M7.html	http://trace.ncbi.nlm.nih.gov/Traces/trace.cgi?&cmd=retrieve&val=TRACE_NAME='55072685' and TEMPLATE_ID='163460_ABC7_000040595700_M7'&dopt=trace&size=1&seeas=Show	Acidovorax	217	4e-57	NA18517	ABC	Human_NA18517	ABC7		2005-06-23	ZY	41720800	m7	WGA
		163460_ABC7_000040595300_M20	ABC7_000040595300_M20	F	55074045	http://lgt.igs.umaryland.edu/traces/55074045_163460_ABC7_000040595300_M20.html	http://trace.ncbi.nlm.nih.gov/Traces/trace.cgi?&cmd=retrieve&val=TRACE_NAME='55074045' and TEMPLATE_ID='163460_ABC7_000040595300_M20'&dopt=trace&size=1&seeas=Show	Acidovorax	453	0	NA18517	ABC	Human_NA18517	ABC7		2005-06-23	ZS	41719400	m20	WGA
		163460_ABC7_000040592800_H5	ABC7_000040592800_H5	F	55044892	http://lgt.igs.umaryland.edu/traces/55044892_163460_ABC7_000040592800_H5.html	http://trace.ncbi.nlm.nih.gov/Traces/trace.cgi?&cmd=retrieve&val=TRACE_NAME='55044892' and TEMPLATE_ID='163460_ABC7_000040592800_H5'&dopt=trace&size=1&seeas=Show	Acidovorax	347	4e-180	NA18517	ABC	Human_NA18517	ABC7		2005-06-22	ZD	41715200	h5	WGA
		163460_ABC7_000040594900_B10	ABC7_000040594900_B10	F	55049575	http://lgt.igs.umaryland.edu/traces/55049575_163460_ABC7_000040594900_B10.html	http://trace.ncbi.nlm.nih.gov/Traces/trace.cgi?&cmd=retrieve&val=TRACE_NAME='55049575' and TEMPLATE_ID='163460_ABC7_000040594900_B10'&dopt=trace&size=1&seeas=Show	Acidovorax	497	0	NA18517	ABC	Human_NA18517	ABC7		2005-06-22	AC	41715400	b10	WGA
		164507_HUMAN_NA18517_FOSMID-014_F24	ABC7_000040621400_F24	R	57258615	http://lgt.igs.umaryland.edu/traces/57258615_164507_HUMAN_NA18517_FOSMID-014_F24.html	http://trace.ncbi.nlm.nih.gov/Traces/trace.cgi?&cmd=retrieve&val=TRACE_NAME='57258615' and TEMPLATE_ID='164507_HUMAN_NA18517_FOSMID-014_F24'&dopt=trace&size=1&seeas=Show	Acidovorax	140	7e-64	NA18517	ABC	Human_NA18517	Human_NA18517		2005-08-10	ZB	41831100	f24	WGA
		164507_HUMAN_NA18517_FOSMID-004_E10	ABC7_000041821600_E10	R	56885511	http://lgt.igs.umaryland.edu/traces/56885511_164507_HUMAN_NA18517_FOSMID-004_E10.html	http://trace.ncbi.nlm.nih.gov/Traces/trace.cgi?&cmd=retrieve&val=TRACE_NAME='56885511' and TEMPLATE_ID='164507_HUMAN_NA18517_FOSMID-004_E10'&dopt=trace&size=1&seeas=Show	Acidovorax	104	4e-35	NA18517	ABC	Human_NA18517	Human_NA18517		2005-08-06	ZP	41824700	e10	WGA
		164507_HUMAN_NA18517_FOSMID-012_O14	ABC7_000041821900_O14	F	56887878	http://lgt.igs.umaryland.edu/traces/56887878_164507_HUMAN_NA18517_FOSMID-012_O14.html	http://trace.ncbi.nlm.nih.gov/Traces/trace.cgi?&cmd=retrieve&val=TRACE_NAME='56887878' and TEMPLATE_ID='164507_HUMAN_NA18517_FOSMID-012_O14'&dopt=trace&size=1&seeas=Show	Acidovorax	128	3e-35	NA18517	ABC	Human_NA18517	Human_NA18517		2005-08-06	ZJ	41823900	o14	WGA
		164507_HUMAN_NA18517_FOSMID-031_K17	ABC7_000040622100_K17	F	57308498	http://lgt.igs.umaryland.edu/traces/57308498_164507_HUMAN_NA18517_FOSMID-031_K17.html	http://trace.ncbi.nlm.nih.gov/Traces/trace.cgi?&cmd=retrieve&val=TRACE_NAME='57308498' and TEMPLATE_ID='164507_HUMAN_NA18517_FOSMID-031_K17'&dopt=trace&size=1&seeas=Show	Acidovorax	359	1e-170	NA18517	ABC	Human_NA18517	Human_NA18517		2005-08-11	ZK	41832800	k17	WGA
		163460_ABC7_000040595400_P19	ABC7_000040595400_P19	F	55073264	http://lgt.igs.umaryland.edu/traces/55073264_163460_ABC7_000040595400_P19.html	http://trace.ncbi.nlm.nih.gov/Traces/trace.cgi?&cmd=retrieve&val=TRACE_NAME='55073264' and TEMPLATE_ID='163460_ABC7_000040595400_P19'&dopt=trace&size=1&seeas=Show	Acidovorax	333	8e-172	NA18517	ABC	Human_NA18517	ABC7		2005-06-23	AG	41710500	p19	WGA
		163285_ABC7_000040619400_P6	ABC7_000040619400_P6	F	56339375	http://lgt.igs.umaryland.edu/traces/56339375_163285_ABC7_000040619400_P6.html	http://trace.ncbi.nlm.nih.gov/Traces/trace.cgi?&cmd=retrieve&val=TRACE_NAME='56339375' and TEMPLATE_ID='163285_ABC7_000040619400_P6'&dopt=trace&size=1&seeas=Show	Acidovorax	364	0	NA18517	ABC	Human_NA18517	ABC7		2005-08-02	ZY	41820000	p6	WGA
		163460_ABC7_000040597200_K6	ABC7_000040597200_K6	F	55080346	http://lgt.igs.umaryland.edu/traces/55080346_163460_ABC7_000040597200_K6.html	http://trace.ncbi.nlm.nih.gov/Traces/trace.cgi?&cmd=retrieve&val=TRACE_NAME='55080346' and TEMPLATE_ID='163460_ABC7_000040597200_K6'&dopt=trace&size=1&seeas=Show	Acidovorax	298	2e-153	NA18517	ABC	Human_NA18517	ABC7		2005-06-23	ZA	41719200	k6	WGA
		163460_ABC7_000040599800_F2	ABC7_000040599800_F2	F	55233647	http://lgt.igs.umaryland.edu/traces/55233647_163460_ABC7_000040599800_F2.html	http://trace.ncbi.nlm.nih.gov/Traces/trace.cgi?&cmd=retrieve&val=TRACE_NAME='55233647' and TEMPLATE_ID='163460_ABC7_000040599800_F2'&dopt=trace&size=1&seeas=Show	Acidovorax	154	2e-79	NA18517	ABC	Human_NA18517	ABC7		2005-07-01	ZG	41730600	f2	WGA
		163460_ABC7_000040597200_B9	ABC7_000040597200_B9	F	55080387	http://lgt.igs.umaryland.edu/traces/55080387_163460_ABC7_000040597200_B9.html	http://trace.ncbi.nlm.nih.gov/Traces/trace.cgi?&cmd=retrieve&val=TRACE_NAME='55080387' and TEMPLATE_ID='163460_ABC7_000040597200_B9'&dopt=trace&size=1&seeas=Show	Acidovorax	103	6e-49	NA18517	ABC	Human_NA18517	ABC7		2005-06-23	ZA	41719200	b9	WGA
		163460_ABC7_000040596700_P23	ABC7_000040596700_P23	R	55079856	http://lgt.igs.umaryland.edu/traces/55079856_163460_ABC7_000040596700_P23.html	http://trace.ncbi.nlm.nih.gov/Traces/trace.cgi?&cmd=retrieve&val=TRACE_NAME='55079856' and TEMPLATE_ID='163460_ABC7_000040596700_P23'&dopt=trace&size=1&seeas=Show	Acidovorax	144	3e-66	NA18517	ABC	Human_NA18517	ABC7		2005-06-23	ZH	41719700	p23	WGA
		164507_HUMAN_NA18517_FOSMID-031_K8	ABC7_000040622100_K8	R	57307755	http://lgt.igs.umaryland.edu/traces/57307755_164507_HUMAN_NA18517_FOSMID-031_K8.html	http://trace.ncbi.nlm.nih.gov/Traces/trace.cgi?&cmd=retrieve&val=TRACE_NAME='57307755' and TEMPLATE_ID='164507_HUMAN_NA18517_FOSMID-031_K8'&dopt=trace&size=1&seeas=Show	Acidovorax	115	1e-53	NA18517	ABC	Human_NA18517	Human_NA18517		2005-08-11	ZK	41832700	k8	WGA
		164507_HUMAN_NA18517_FOSMID-022_L10	ABC7_000040620300_L10	F	57265020	http://lgt.igs.umaryland.edu/traces/57265020_164507_HUMAN_NA18517_FOSMID-022_L10.html	http://trace.ncbi.nlm.nih.gov/Traces/trace.cgi?&cmd=retrieve&val=TRACE_NAME='57265020' and TEMPLATE_ID='164507_HUMAN_NA18517_FOSMID-022_L10'&dopt=trace&size=1&seeas=Show	Acidovorax	128	4e-35	NA18517	ABC	Human_NA18517	Human_NA18517		2005-08-10	ZL	41831600	l10	WGA
		163460_ABC7_000040590900_B17	ABC7_000040590900_B17	F	55217563	http://lgt.igs.umaryland.edu/traces/55217563_163460_ABC7_000040590900_B17.html	http://trace.ncbi.nlm.nih.gov/Traces/trace.cgi?&cmd=retrieve&val=TRACE_NAME='55217563' and TEMPLATE_ID='163460_ABC7_000040590900_B17'&dopt=trace&size=1&seeas=Show	Acidovorax	310	5e-158	NA18517	ABC	Human_NA18517	ABC7		2005-06-30	AD	41729000	b17	WGA
		163460_ABC7_000040597200_N20	ABC7_000040597200_N20	R	55084799	http://lgt.igs.umaryland.edu/traces/55084799_163460_ABC7_000040597200_N20.html	http://trace.ncbi.nlm.nih.gov/Traces/trace.cgi?&cmd=retrieve&val=TRACE_NAME='55084799' and TEMPLATE_ID='163460_ABC7_000040597200_N20'&dopt=trace&size=1&seeas=Show	Acidovorax	148	1e-68	NA18517	ABC	Human_NA18517	ABC7		2005-06-23	ZK	41719100	n20	WGA
		163460_ABC7_000040595000_O10	ABC7_000040595000_O10	R	55077342	http://lgt.igs.umaryland.edu/traces/55077342_163460_ABC7_000040595000_O10.html	http://trace.ncbi.nlm.nih.gov/Traces/trace.cgi?&cmd=retrieve&val=TRACE_NAME='55077342' and TEMPLATE_ID='163460_ABC7_000040595000_O10'&dopt=trace&size=1&seeas=Show	Acidovorax	166	5e-65	NA18517	ABC	Human_NA18517	ABC7		2005-06-23	ZC	41622900	o10	WGA
		163460_ABC7_000040595500_K10	ABC7_000040595500_K10	R	55078874	http://lgt.igs.umaryland.edu/traces/55078874_163460_ABC7_000040595500_K10.html	http://trace.ncbi.nlm.nih.gov/Traces/trace.cgi?&cmd=retrieve&val=TRACE_NAME='55078874' and TEMPLATE_ID='163460_ABC7_000040595500_K10'&dopt=trace&size=1&seeas=Show	Acidovorax	221	9e-110	NA18517	ABC	Human_NA18517	ABC7		2005-06-23	ZG	41719500	k10	WGA
		163460_ABC7_000040595700_J18	ABC7_000040595700_J18	R	55072859	http://lgt.igs.umaryland.edu/traces/55072859_163460_ABC7_000040595700_J18.html	http://trace.ncbi.nlm.nih.gov/Traces/trace.cgi?&cmd=retrieve&val=TRACE_NAME='55072859' and TEMPLATE_ID='163460_ABC7_000040595700_J18'&dopt=trace&size=1&seeas=Show	Acidovorax	165	4e-69	NA18517	ABC	Human_NA18517	ABC7		2005-06-23	ZY	41720800	j18	WGA
		165431_ABC7_000042420800_B22	165431_ABC7_000042420800_B22	R	58928235	http://lgt.igs.umaryland.edu/traces/58928235_165431_ABC7_000042420800_B22.html	http://trace.ncbi.nlm.nih.gov/Traces/trace.cgi?&cmd=retrieve&val=TRACE_NAME='58928235' and TEMPLATE_ID='165431_ABC7_000042420800_B22'&dopt=trace&size=1&seeas=Show	Acidovorax	383	0	NA18517	ABC	Human_NA18517	ABC7		2005-09-05	ZP	40701500	b22	WGA
	Acidovorax,Alicycliphilus
		163460_ABC7_000040595700_P20	ABC7_000040595700_P20	F	55076256	http://lgt.igs.umaryland.edu/traces/55076256_163460_ABC7_000040595700_P20.html	http://trace.ncbi.nlm.nih.gov/Traces/trace.cgi?&cmd=retrieve&val=TRACE_NAME='55076256' and TEMPLATE_ID='163460_ABC7_000040595700_P20'&dopt=trace&size=1&seeas=Show	Acidovorax,Alicycliphilus	252	8e-138	NA18517	ABC	Human_NA18517	ABC7		2005-06-23	ZX	41720600	p20	WGA
	Acidovorax,Alicycliphilus,Comamonas,Delftia
		166320_ABC7_000000478222_I16	166320_ABC7_000000478222_I16	R	61808699	http://lgt.igs.umaryland.edu/traces/61808699_166320_ABC7_000000478222_I16.html	http://trace.ncbi.nlm.nih.gov/Traces/trace.cgi?&cmd=retrieve&val=TRACE_NAME='61808699' and TEMPLATE_ID='166320_ABC7_000000478222_I16'&dopt=trace&size=1&seeas=Show	Acidovorax,Alicycliphilus,Comamonas,Delftia	585	0	NA18517	ABC	Human_NA18517	ABC7		2005-10-05	AG	507022	i16	WGA
	Acidovorax,Alicycliphilus,Comamonas,Delftia,Variovorax
		L34432P64B14	RP11-928F19	R	L34432P64RB14.T0	http://lgt.igs.umaryland.edu/traces/L34432P64RB14.T0_L34432P64B14.html	http://trace.ncbi.nlm.nih.gov/Traces/trace.cgi?&cmd=retrieve&val=TRACE_NAME='L34432P64RB14.T0' and TEMPLATE_ID='L34432P64B14'&dopt=trace&size=1&seeas=Show	Acidovorax,Alicycliphilus,Comamonas,Delftia,Variovorax	699	0		WIBR	L34432	L34432P1			NL	L34432P64	b14	Clone
	Acidovorax,Bordetella,Comamonas,Delftia
		168825_ABC8_4_1_000000789422_B11	168825_ABC8_4_1_000000789422_B11	R	67084244	http://lgt.igs.umaryland.edu/traces/67084244_168825_ABC8_4_1_000000789422_B11.html	http://trace.ncbi.nlm.nih.gov/Traces/trace.cgi?&cmd=retrieve&val=TRACE_NAME='67084244' and TEMPLATE_ID='168825_ABC8_4_1_000000789422_B11'&dopt=trace&size=1&seeas=Show	Acidovorax,Bordetella,Comamonas,Delftia	125	8e-55	NA18507	ABC	Human_NA18507	ABC8_4_1		2006-01-01	AG	817322	b11	WGA
		163285_ABC7_000040618600_L8	ABC7_000040618600_L8	F	56349436	http://lgt.igs.umaryland.edu/traces/56349436_163285_ABC7_000040618600_L8.html	http://trace.ncbi.nlm.nih.gov/Traces/trace.cgi?&cmd=retrieve&val=TRACE_NAME='56349436' and TEMPLATE_ID='163285_ABC7_000040618600_L8'&dopt=trace&size=1&seeas=Show	Acidovorax,Bordetella,Comamonas,Delftia	257	9e-141	NA18517	ABC	Human_NA18517	ABC7		2005-08-02	ZE	41818800	l8	WGA
	Acidovorax,Burkholderia,Pseudomonas
		171515_ABC9_3_5_000046215100_O14	171515_ABC9_3_5_000046215100_O14	F	73619236	http://lgt.igs.umaryland.edu/traces/73619236_171515_ABC9_3_5_000046215100_O14.html	http://trace.ncbi.nlm.nih.gov/Traces/trace.cgi?&cmd=retrieve&val=TRACE_NAME='73619236' and TEMPLATE_ID='171515_ABC9_3_5_000046215100_O14'&dopt=trace&size=1&seeas=Show	Acidovorax,Burkholderia,Pseudomonas	126	2e-55	NA18956	ABC	Human_NA18956	ABC9_3_5		2006-03-13	ZQ	46246400	o14	WGA
	Acidovorax,Pseudomonas
		171515_ABC9_3_5_000043937900_M22	171515_ABC9_3_5_000043937900_M22	R	73029285	http://lgt.igs.umaryland.edu/traces/73029285_171515_ABC9_3_5_000043937900_M22.html	http://trace.ncbi.nlm.nih.gov/Traces/trace.cgi?&cmd=retrieve&val=TRACE_NAME='73029285' and TEMPLATE_ID='171515_ABC9_3_5_000043937900_M22'&dopt=trace&size=1&seeas=Show	Acidovorax,Pseudomonas	110	4e-41	NA18956	ABC	Human_NA18956	ABC9_3_5		2006-03-08	ZE	46203900	m22	WGA
		172343_ABC9_3_5_000044003600_G19	172343_ABC9_3_5_000044003600_G19	R	74579635	http://lgt.igs.umaryland.edu/traces/74579635_172343_ABC9_3_5_000044003600_G19.html	http://trace.ncbi.nlm.nih.gov/Traces/trace.cgi?&cmd=retrieve&val=TRACE_NAME='74579635' and TEMPLATE_ID='172343_ABC9_3_5_000044003600_G19'&dopt=trace&size=1&seeas=Show	Acidovorax,Pseudomonas	115	2e-46	NA18956	ABC	Human_NA18956	ABC9_3_5		2006-03-21	AB	46284700	g19	WGA
		172343_ABC9_3_5_000044005500_A21	172343_ABC9_3_5_000044005500_A21	R	74827040	http://lgt.igs.umaryland.edu/traces/74827040_172343_ABC9_3_5_000044005500_A21.html	http://trace.ncbi.nlm.nih.gov/Traces/trace.cgi?&cmd=retrieve&val=TRACE_NAME='74827040' and TEMPLATE_ID='172343_ABC9_3_5_000044005500_A21'&dopt=trace&size=1&seeas=Show	Acidovorax,Pseudomonas	120	2e-42	NA18956	ABC	Human_NA18956	ABC9_3_5		2006-03-23	ZG	45355900	a21	WGA
		172343_ABC9_3_5_000045485500_B17	172343_ABC9_3_5_000045485500_B17	R	75890300	http://lgt.igs.umaryland.edu/traces/75890300_172343_ABC9_3_5_000045485500_B17.html	http://trace.ncbi.nlm.nih.gov/Traces/trace.cgi?&cmd=retrieve&val=TRACE_NAME='75890300' and TEMPLATE_ID='172343_ABC9_3_5_000045485500_B17'&dopt=trace&size=1&seeas=Show	Acidovorax,Pseudomonas	122	2e-55	NA18956	ABC	Human_NA18956	ABC9_3_5		2006-04-02	AE	43383800	b17	WGA
		172343_ABC9_3_5_000044023200_H8	172343_ABC9_3_5_000044023200_H8	R	75110529	http://lgt.igs.umaryland.edu/traces/75110529_172343_ABC9_3_5_000044023200_H8.html	http://trace.ncbi.nlm.nih.gov/Traces/trace.cgi?&cmd=retrieve&val=TRACE_NAME='75110529' and TEMPLATE_ID='172343_ABC9_3_5_000044023200_H8'&dopt=trace&size=1&seeas=Show	Acidovorax,Pseudomonas	114	8e-46	NA18956	ABC	Human_NA18956	ABC9_3_5		2006-03-26	AE	45404000	h8	WGA
		168825_ABC8_4_1_000041114000_H10	168825_ABC8_4_1_000041114000_H10	R	67807906	http://lgt.igs.umaryland.edu/traces/67807906_168825_ABC8_4_1_000041114000_H10.html	http://trace.ncbi.nlm.nih.gov/Traces/trace.cgi?&cmd=retrieve&val=TRACE_NAME='67807906' and TEMPLATE_ID='168825_ABC8_4_1_000041114000_H10'&dopt=trace&size=1&seeas=Show	Acidovorax,Pseudomonas	113	2e-52	NA18507	ABC	Human_NA18507	ABC8_4_1		2006-01-13	ZB	44950200	h10	WGA
		164507_HUMAN_NA18517_FOSMID-034_A6	ABC7_000040620500_A6	R	57263384	http://lgt.igs.umaryland.edu/traces/57263384_164507_HUMAN_NA18517_FOSMID-034_A6.html	http://trace.ncbi.nlm.nih.gov/Traces/trace.cgi?&cmd=retrieve&val=TRACE_NAME='57263384' and TEMPLATE_ID='164507_HUMAN_NA18517_FOSMID-034_A6'&dopt=trace&size=1&seeas=Show	Acidovorax,Pseudomonas	239	1e-115	NA18517	ABC	Human_NA18517	Human_NA18517		2005-08-10	AA	41832300	a6	WGA
	Acidovorax,Verminephrobacter
		163460_ABC7_000040593500_M4	ABC7_000040593500_M4	F	55051505	http://lgt.igs.umaryland.edu/traces/55051505_163460_ABC7_000040593500_M4.html	http://trace.ncbi.nlm.nih.gov/Traces/trace.cgi?&cmd=retrieve&val=TRACE_NAME='55051505' and TEMPLATE_ID='163460_ABC7_000040593500_M4'&dopt=trace&size=1&seeas=Show	Acidovorax,Verminephrobacter	200	1e-56	NA18517	ABC	Human_NA18517	ABC7		2005-06-22	ZF	41715000	m4	WGA
	Acidovorax,Xanthomonas
		HENKP2662	RP13-597M11	R	37788691	http://lgt.igs.umaryland.edu/traces/37788691_HENKP2662.html	http://trace.ncbi.nlm.nih.gov/Traces/trace.cgi?&cmd=retrieve&val=TRACE_NAME='37788691' and TEMPLATE_ID='HENKP2662'&dopt=trace&size=1&seeas=Show	Acidovorax,Xanthomonas	157	3e-76		BCM	HENK	HENKP	518487	2002-10-02	cba	HENKP1E2600
		170215_ABC9_3_2_000041261500_M2	170215_ABC9_3_2_000041261500_M2	F	70339349	http://lgt.igs.umaryland.edu/traces/70339349_170215_ABC9_3_2_000041261500_M2.html	http://trace.ncbi.nlm.nih.gov/Traces/trace.cgi?&cmd=retrieve&val=TRACE_NAME='70339349' and TEMPLATE_ID='170215_ABC9_3_2_000041261500_M2'&dopt=trace&size=1&seeas=Show	Acidovorax,Xanthomonas	122	6e-46	NA18956	ABC	Human_NA18956	ABC9_3_2		2006-02-11	ZQ	45050000	m2	WGA
	Acinetobacter
		171515_ABC9_3_5_000043915700_B8	171515_ABC9_3_5_000043915700_B8	F	72634483	http://lgt.igs.umaryland.edu/traces/72634483_171515_ABC9_3_5_000043915700_B8.html	http://trace.ncbi.nlm.nih.gov/Traces/trace.cgi?&cmd=retrieve&val=TRACE_NAME='72634483' and TEMPLATE_ID='171515_ABC9_3_5_000043915700_B8'&dopt=trace&size=1&seeas=Show	Acinetobacter	169	1e-47	NA18956	ABC	Human_NA18956	ABC9_3_5		2006-03-05	ZM	46128700	b8	WGA
		HEOQP0102	RP11-683D9	R	37439908	http://lgt.igs.umaryland.edu/traces/37439908_HEOQP0102.html	http://trace.ncbi.nlm.nih.gov/Traces/trace.cgi?&cmd=retrieve&val=TRACE_NAME='37439908' and TEMPLATE_ID='HEOQP0102'&dopt=trace&size=1&seeas=Show	Acinetobacter	320	1e-87		BCM	HEOQ	HEOQP	513743	2002-09-26	ina	HEOQP1E0100
		174552_ABC10_2_1_000046312200_G19	174552_ABC10_2_1_000046312200_G19	R	81749095	http://lgt.igs.umaryland.edu/traces/81749095_174552_ABC10_2_1_000046312200_G19.html	http://trace.ncbi.nlm.nih.gov/Traces/trace.cgi?&cmd=retrieve&val=TRACE_NAME='81749095' and TEMPLATE_ID='174552_ABC10_2_1_000046312200_G19'&dopt=trace&size=1&seeas=Show	Acinetobacter	234	1e-124	NA19240	ABC	Human_NA19240	ABC10_2_1		2006-05-27	AD	48983800	g19	WGA
		170143_ABC8_4_1_000043759200_H8	170143_ABC8_4_1_000043759200_H8	F	68404958	http://lgt.igs.umaryland.edu/traces/68404958_170143_ABC8_4_1_000043759200_H8.html	http://trace.ncbi.nlm.nih.gov/Traces/trace.cgi?&cmd=retrieve&val=TRACE_NAME='68404958' and TEMPLATE_ID='170143_ABC8_4_1_000043759200_H8'&dopt=trace&size=1&seeas=Show	Acinetobacter	199	2e-101	NA18507	ABC	Human_NA18507	ABC8_4_1		2006-01-20	ZU	45765700	h8	WGA
		172343_ABC9_3_5_000044034500_M3	172343_ABC9_3_5_000044034500_M3	R	75389710	http://lgt.igs.umaryland.edu/traces/75389710_172343_ABC9_3_5_000044034500_M3.html	http://trace.ncbi.nlm.nih.gov/Traces/trace.cgi?&cmd=retrieve&val=TRACE_NAME='75389710' and TEMPLATE_ID='172343_ABC9_3_5_000044034500_M3'&dopt=trace&size=1&seeas=Show	Acinetobacter	175	4e-87	NA18956	ABC	Human_NA18956	ABC9_3_5		2006-03-27	ZW	45459200	m3	WGA
		168825_ABC8_4_1_000000706022_E5	168825_ABC8_4_1_000000706022_E5	F	66761955	http://lgt.igs.umaryland.edu/traces/66761955_168825_ABC8_4_1_000000706022_E5.html	http://trace.ncbi.nlm.nih.gov/Traces/trace.cgi?&cmd=retrieve&val=TRACE_NAME='66761955' and TEMPLATE_ID='168825_ABC8_4_1_000000706022_E5'&dopt=trace&size=1&seeas=Show	Acinetobacter	168	3e-85	NA18507	ABC	Human_NA18507	ABC8_4_1		2005-12-26	ZN	733422	e5	WGA
		1203873_ABC13_11_000048569900_A16	1203873_ABC13_11_000048569900_A16	R	99055671	http://lgt.igs.umaryland.edu/traces/99055671_1203873_ABC13_11_000048569900_A16.html	http://trace.ncbi.nlm.nih.gov/Traces/trace.cgi?&cmd=retrieve&val=TRACE_NAME='99055671' and TEMPLATE_ID='1203873_ABC13_11_000048569900_A16'&dopt=trace&size=1&seeas=Show	Acinetobacter	194	8e-63	NA19129	ABC	Human_NA19129	ABC13_11		2006-12-05	ZL	48585800	a16	WGA
		HECOP1977	RP11-151B16	R	HECOP1E1977A	http://lgt.igs.umaryland.edu/traces/HECOP1E1977A_HECOP1977.html	http://trace.ncbi.nlm.nih.gov/Traces/trace.cgi?&cmd=retrieve&val=TRACE_NAME='HECOP1E1977A' and TEMPLATE_ID='HECOP1977'&dopt=trace&size=1&seeas=Show	Acinetobacter	263	5e-75		BCM	HECO		372697	2002-04-02	wym	HECOP1E1900
		170215_ABC9_3_2_000043864800_K15	170215_ABC9_3_2_000043864800_K15	R	71636446	http://lgt.igs.umaryland.edu/traces/71636446_170215_ABC9_3_2_000043864800_K15.html	http://trace.ncbi.nlm.nih.gov/Traces/trace.cgi?&cmd=retrieve&val=TRACE_NAME='71636446' and TEMPLATE_ID='170215_ABC9_3_2_000043864800_K15'&dopt=trace&size=1&seeas=Show	Acinetobacter	149	3e-76	NA18956	ABC	Human_NA18956	ABC9_3_2		2006-02-24	ZN	45168000	k15	WGA
		165338_ABC7_000041851100_E15	165338_ABC7_000041851100_E15	R	58819450	http://lgt.igs.umaryland.edu/traces/58819450_165338_ABC7_000041851100_E15.html	http://trace.ncbi.nlm.nih.gov/Traces/trace.cgi?&cmd=retrieve&val=TRACE_NAME='58819450' and TEMPLATE_ID='165338_ABC7_000041851100_E15'&dopt=trace&size=1&seeas=Show	Acinetobacter	290	5e-117	NA18517	ABC	Human_NA18517	ABC7		2005-09-04	ZG	40197100	e15	WGA
		163460_ABC7_000040597100_A21	ABC7_000040597100_A21	R	55080193	http://lgt.igs.umaryland.edu/traces/55080193_163460_ABC7_000040597100_A21.html	http://trace.ncbi.nlm.nih.gov/Traces/trace.cgi?&cmd=retrieve&val=TRACE_NAME='55080193' and TEMPLATE_ID='163460_ABC7_000040597100_A21'&dopt=trace&size=1&seeas=Show	Acinetobacter	134	1e-62	NA18517	ABC	Human_NA18517	ABC7		2005-06-23	AC	41718900	a21	WGA
		163285_ABC7_000040619100_E11	ABC7_000040619100_E11	R	56346021	http://lgt.igs.umaryland.edu/traces/56346021_163285_ABC7_000040619100_E11.html	http://trace.ncbi.nlm.nih.gov/Traces/trace.cgi?&cmd=retrieve&val=TRACE_NAME='56346021' and TEMPLATE_ID='163285_ABC7_000040619100_E11'&dopt=trace&size=1&seeas=Show	Acinetobacter	141	6e-36	NA18517	ABC	Human_NA18517	ABC7		2005-08-02	ZK	41820100	e11	WGA
		163285_ABC7_000040618400_L6	ABC7_000040618400_L6	R	56347868	http://lgt.igs.umaryland.edu/traces/56347868_163285_ABC7_000040618400_L6.html	http://trace.ncbi.nlm.nih.gov/Traces/trace.cgi?&cmd=retrieve&val=TRACE_NAME='56347868' and TEMPLATE_ID='163285_ABC7_000040618400_L6'&dopt=trace&size=1&seeas=Show	Acinetobacter	177	2e-64	NA18517	ABC	Human_NA18517	ABC7		2005-08-02	ZR	41818200	l6	WGA
		163460_ABC7_000040591100_C21	ABC7_000040591100_C21	F	55203226	http://lgt.igs.umaryland.edu/traces/55203226_163460_ABC7_000040591100_C21.html	http://trace.ncbi.nlm.nih.gov/Traces/trace.cgi?&cmd=retrieve&val=TRACE_NAME='55203226' and TEMPLATE_ID='163460_ABC7_000040591100_C21'&dopt=trace&size=1&seeas=Show	Acinetobacter	203	4e-81	NA18517	ABC	Human_NA18517	ABC7		2005-06-30	ZC	41729200	c21	WGA
		165377_ABC7_000042392400_N20	165377_ABC7_000042392400_N20	R	58806772	http://lgt.igs.umaryland.edu/traces/58806772_165377_ABC7_000042392400_N20.html	http://trace.ncbi.nlm.nih.gov/Traces/trace.cgi?&cmd=retrieve&val=TRACE_NAME='58806772' and TEMPLATE_ID='165377_ABC7_000042392400_N20'&dopt=trace&size=1&seeas=Show	Acinetobacter	290	5e-117	NA18517	ABC	Human_NA18517	ABC7		2005-09-03	ZQ	40675200	n20	WGA
	Acinetobacter,uncultured
		1205403_ABC13_11_000048873900_C23	1205403_ABC13_11_000048873900_C23	R	101442494	http://lgt.igs.umaryland.edu/traces/101442494_1205403_ABC13_11_000048873900_C23.html	http://trace.ncbi.nlm.nih.gov/Traces/trace.cgi?&cmd=retrieve&val=TRACE_NAME='101442494' and TEMPLATE_ID='1205403_ABC13_11_000048873900_C23'&dopt=trace&size=1&seeas=Show	Acinetobacter,uncultured	171	2e-70	NA19129	ABC	Human_NA19129	ABC13_11		2007-01-13	ZQ	48880100	c23	WGA
		166083_ABC8_000042662300_G23	166083_ABC8_000042662300_G23	F	61691272	http://lgt.igs.umaryland.edu/traces/61691272_166083_ABC8_000042662300_G23.html	http://trace.ncbi.nlm.nih.gov/Traces/trace.cgi?&cmd=retrieve&val=TRACE_NAME='61691272' and TEMPLATE_ID='166083_ABC8_000042662300_G23'&dopt=trace&size=1&seeas=Show	Acinetobacter,uncultured	180	8e-95	NA18507	ABC	Human_NA18507	ABC8		2005-10-03	ZT	42674900	g23	WGA
	Actinobacillus
		174779_ABC12_000046337900_I17	174779_ABC12_000046337900_I17	F	82305459	http://lgt.igs.umaryland.edu/traces/82305459_174779_ABC12_000046337900_I17.html	http://trace.ncbi.nlm.nih.gov/Traces/trace.cgi?&cmd=retrieve&val=TRACE_NAME='82305459' and TEMPLATE_ID='174779_ABC12_000046337900_I17'&dopt=trace&size=1&seeas=Show	Actinobacillus	276	5e-90	NA12878	ABC	Human_NA12878	ABC12		2006-05-31	ZD	49019300	i17	WGA
		174779_ABC12_000046975100_B17	174779_ABC12_000046975100_B17	F	85939155	http://lgt.igs.umaryland.edu/traces/85939155_174779_ABC12_000046975100_B17.html	http://trace.ncbi.nlm.nih.gov/Traces/trace.cgi?&cmd=retrieve&val=TRACE_NAME='85939155' and TEMPLATE_ID='174779_ABC12_000046975100_B17'&dopt=trace&size=1&seeas=Show	Actinobacillus	293	8e-98	NA12878	ABC	Human_NA12878	ABC12		2006-07-04	AK	48473341	b17	WGA
	Aeromonas
		167098_ABC8_000000649922_J3	167098_ABC8_000000649922_J3	R	64471065	http://lgt.igs.umaryland.edu/traces/64471065_167098_ABC8_000000649922_J3.html	http://trace.ncbi.nlm.nih.gov/Traces/trace.cgi?&cmd=retrieve&val=TRACE_NAME='64471065' and TEMPLATE_ID='167098_ABC8_000000649922_J3'&dopt=trace&size=1&seeas=Show	Aeromonas	208	6e-59	NA18507	ABC	Human_NA18507	ABC8		2005-11-24	ZD	687822	j3	WGA
	Aeromonas,Alicycliphilus,Burkholderia,Delftia,Enterobacter,Thauera
		171515_ABC9_3_5_000043957100_E11	171515_ABC9_3_5_000043957100_E11	R	73483985	http://lgt.igs.umaryland.edu/traces/73483985_171515_ABC9_3_5_000043957100_E11.html	http://trace.ncbi.nlm.nih.gov/Traces/trace.cgi?&cmd=retrieve&val=TRACE_NAME='73483985' and TEMPLATE_ID='171515_ABC9_3_5_000043957100_E11'&dopt=trace&size=1&seeas=Show	Aeromonas,Alicycliphilus,Burkholderia,Delftia,Enterobacter,Thauera	174	3e-91	NA18956	ABC	Human_NA18956	ABC9_3_5		2006-03-12	ZV	46223300	e11	WGA
	Aeromonas,Klebsiella,Pseudomonas,uncultured
		171417_ABC10_2_1_000044462100_I24	171417_ABC10_2_1_000044462100_I24	F	77419936	http://lgt.igs.umaryland.edu/traces/77419936_171417_ABC10_2_1_000044462100_I24.html	http://trace.ncbi.nlm.nih.gov/Traces/trace.cgi?&cmd=retrieve&val=TRACE_NAME='77419936' and TEMPLATE_ID='171417_ABC10_2_1_000044462100_I24'&dopt=trace&size=1&seeas=Show	Aeromonas,Klebsiella,Pseudomonas,uncultured	185	5e-93	NA19240	ABC	Human_NA19240	ABC10_2_1		2006-04-16	AF	43338600	i24	WGA
	Alicycliphilus
		HWWHQ442029		F	55753185	http://lgt.igs.umaryland.edu/traces/55753185_HWWHQ442029.html	http://trace.ncbi.nlm.nih.gov/Traces/trace.cgi?&cmd=retrieve&val=TRACE_NAME='55753185' and TEMPLATE_ID='HWWHQ442029'&dopt=trace&size=1&seeas=Show	Alicycliphilus	179	9e-61		BCM	HWWH	HWWHQ	738631	2003-05-16	rid	HWWHQ1D442000
		165936_ABC8_000042544100_E5	165936_ABC8_000042544100_E5	R	61246456	http://lgt.igs.umaryland.edu/traces/61246456_165936_ABC8_000042544100_E5.html	http://trace.ncbi.nlm.nih.gov/Traces/trace.cgi?&cmd=retrieve&val=TRACE_NAME='61246456' and TEMPLATE_ID='165936_ABC8_000042544100_E5'&dopt=trace&size=1&seeas=Show	Alicycliphilus	286	4e-75	NA18507	ABC	Human_NA18507	ABC8		2005-09-26	ZH	42982700	e5	WGA
		166692_ABC7_000042055100_B4	166692_ABC7_000042055100_B4	R	62825589	http://lgt.igs.umaryland.edu/traces/62825589_166692_ABC7_000042055100_B4.html	http://trace.ncbi.nlm.nih.gov/Traces/trace.cgi?&cmd=retrieve&val=TRACE_NAME='62825589' and TEMPLATE_ID='166692_ABC7_000042055100_B4'&dopt=trace&size=1&seeas=Show	Alicycliphilus	141	5e-43	NA18517	ABC	Human_NA18517	ABC7		2005-10-25	ZA	43123100	b4	WGA
		163460_ABC7_000040590800_K20	ABC7_000040590800_K20	R	55202450	http://lgt.igs.umaryland.edu/traces/55202450_163460_ABC7_000040590800_K20.html	http://trace.ncbi.nlm.nih.gov/Traces/trace.cgi?&cmd=retrieve&val=TRACE_NAME='55202450' and TEMPLATE_ID='163460_ABC7_000040590800_K20'&dopt=trace&size=1&seeas=Show	Alicycliphilus	104	4e-35	NA18517	ABC	Human_NA18517	ABC7		2005-06-30	ZE	41727200	k20	WGA
	Alicycliphilus,Bordetella,Burkholderia,Comamonas,Delftia,Enterobacter,Pseudomonas,Ralstonia,uncultured
		166941_ABC7_000043084200_K20	166941_ABC7_000043084200_K20	R	62669060	http://lgt.igs.umaryland.edu/traces/62669060_166941_ABC7_000043084200_K20.html	http://trace.ncbi.nlm.nih.gov/Traces/trace.cgi?&cmd=retrieve&val=TRACE_NAME='62669060' and TEMPLATE_ID='166941_ABC7_000043084200_K20'&dopt=trace&size=1&seeas=Show	Alicycliphilus,Bordetella,Burkholderia,Comamonas,Delftia,Enterobacter,Pseudomonas,Ralstonia,uncultured	250	1e-136	NA18517	ABC	Human_NA18517	ABC7		2005-10-21	ZL	42019500	k20	WGA
	Alicycliphilus,Burkholderia,Delftia,Enterobacter,Pseudomonas,uncultured
		172343_ABC9_3_5_000045475000_F23	172343_ABC9_3_5_000045475000_F23	F	75815970	http://lgt.igs.umaryland.edu/traces/75815970_172343_ABC9_3_5_000045475000_F23.html	http://trace.ncbi.nlm.nih.gov/Traces/trace.cgi?&cmd=retrieve&val=TRACE_NAME='75815970' and TEMPLATE_ID='172343_ABC9_3_5_000045475000_F23'&dopt=trace&size=1&seeas=Show	Alicycliphilus,Burkholderia,Delftia,Enterobacter,Pseudomonas,uncultured	102	2e-48	NA18956	ABC	Human_NA18956	ABC9_3_5		2006-03-31	AF	43361300	f23	WGA
	Azotobacter
		170215_ABC9_3_2_000045917800_P13	170215_ABC9_3_2_000045917800_P13	F	70795446	http://lgt.igs.umaryland.edu/traces/70795446_170215_ABC9_3_2_000045917800_P13.html	http://trace.ncbi.nlm.nih.gov/Traces/trace.cgi?&cmd=retrieve&val=TRACE_NAME='70795446' and TEMPLATE_ID='170215_ABC9_3_2_000045917800_P13'&dopt=trace&size=1&seeas=Show	Azotobacter	131	7e-49	NA18956	ABC	Human_NA18956	ABC9_3_2		2006-02-15	ZG	45120500	p13	WGA
	Bordetella
		171515_ABC9_3_5_000046183600_D20	171515_ABC9_3_5_000046183600_D20	F	73276690	http://lgt.igs.umaryland.edu/traces/73276690_171515_ABC9_3_5_000046183600_D20.html	http://trace.ncbi.nlm.nih.gov/Traces/trace.cgi?&cmd=retrieve&val=TRACE_NAME='73276690' and TEMPLATE_ID='171515_ABC9_3_5_000046183600_D20'&dopt=trace&size=1&seeas=Show	Bordetella	266	4e-115	NA18956	ABC	Human_NA18956	ABC9_3_5		2006-03-10	AJ	46200200	d20	WGA
		171515_ABC9_3_5_000043932900_G7	171515_ABC9_3_5_000043932900_G7	F	73023680	http://lgt.igs.umaryland.edu/traces/73023680_171515_ABC9_3_5_000043932900_G7.html	http://trace.ncbi.nlm.nih.gov/Traces/trace.cgi?&cmd=retrieve&val=TRACE_NAME='73023680' and TEMPLATE_ID='171515_ABC9_3_5_000043932900_G7'&dopt=trace&size=1&seeas=Show	Bordetella	261	2e-114	NA18956	ABC	Human_NA18956	ABC9_3_5		2006-03-08	ZL	46170600	g7	WGA
		172343_ABC9_3_5_000043351700_N16	172343_ABC9_3_5_000043351700_N16	R	77988633	http://lgt.igs.umaryland.edu/traces/77988633_172343_ABC9_3_5_000043351700_N16.html	http://trace.ncbi.nlm.nih.gov/Traces/trace.cgi?&cmd=retrieve&val=TRACE_NAME='77988633' and TEMPLATE_ID='172343_ABC9_3_5_000043351700_N16'&dopt=trace&size=1&seeas=Show	Bordetella	268	3e-116	NA18956	ABC	Human_NA18956	ABC9_3_5		2006-04-21	AA	43635800	m16	WGA
		172343_ABC9_3_5_000043351700_N16	172343_ABC9_3_5_000043351700_N16	F	77989017	http://lgt.igs.umaryland.edu/traces/77989017_172343_ABC9_3_5_000043351700_N16.html	http://trace.ncbi.nlm.nih.gov/Traces/trace.cgi?&cmd=retrieve&val=TRACE_NAME='77989017' and TEMPLATE_ID='172343_ABC9_3_5_000043351700_N16'&dopt=trace&size=1&seeas=Show	Bordetella	256	2e-111	NA18956	ABC	Human_NA18956	ABC9_3_5		2006-04-21	AA	43635700	m16	WGA
		172343_ABC9_3_5_000044032800_B17	172343_ABC9_3_5_000044032800_B17	F	75373657	http://lgt.igs.umaryland.edu/traces/75373657_172343_ABC9_3_5_000044032800_B17.html	http://trace.ncbi.nlm.nih.gov/Traces/trace.cgi?&cmd=retrieve&val=TRACE_NAME='75373657' and TEMPLATE_ID='172343_ABC9_3_5_000044032800_B17'&dopt=trace&size=1&seeas=Show	Bordetella	267	9e-116	NA18956	ABC	Human_NA18956	ABC9_3_5		2006-03-27	ZI	45459900	b17	WGA
		170215_ABC9_3_2_000043831500_G17	170215_ABC9_3_2_000043831500_G17	F	71281647	http://lgt.igs.umaryland.edu/traces/71281647_170215_ABC9_3_2_000043831500_G17.html	http://trace.ncbi.nlm.nih.gov/Traces/trace.cgi?&cmd=retrieve&val=TRACE_NAME='71281647' and TEMPLATE_ID='170215_ABC9_3_2_000043831500_G17'&dopt=trace&size=1&seeas=Show	Bordetella	217	2e-114	NA18956	ABC	Human_NA18956	ABC9_3_2		2006-02-19	AH	45139500	g17	WGA
	Bordetella,Burkholderia,Pseudomonas
		170143_ABC8_4_1_000041189600_A1	170143_ABC8_4_1_000041189600_A1	R	68786665	http://lgt.igs.umaryland.edu/traces/68786665_170143_ABC8_4_1_000041189600_A1.html	http://trace.ncbi.nlm.nih.gov/Traces/trace.cgi?&cmd=retrieve&val=TRACE_NAME='68786665' and TEMPLATE_ID='170143_ABC8_4_1_000041189600_A1'&dopt=trace&size=1&seeas=Show	Bordetella,Burkholderia,Pseudomonas	469	0	NA18507	ABC	Human_NA18507	ABC8_4_1		2006-01-26	ZH	45801100	a1	WGA
	Bordetella,Delftia
		168825_ABC8_4_1_000000792022_O11	168825_ABC8_4_1_000000792022_O11	F	67070108	http://lgt.igs.umaryland.edu/traces/67070108_168825_ABC8_4_1_000000792022_O11.html	http://trace.ncbi.nlm.nih.gov/Traces/trace.cgi?&cmd=retrieve&val=TRACE_NAME='67070108' and TEMPLATE_ID='168825_ABC8_4_1_000000792022_O11'&dopt=trace&size=1&seeas=Show	Bordetella,Delftia	124	2e-61	NA18507	ABC	Human_NA18507	ABC8_4_1		2006-01-01	ZP	45615800	o11	WGA
	Bordetella,Delftia,Pseudomonas
		172343_ABC9_3_5_000043971600_L9	172343_ABC9_3_5_000043971600_L9	R	73892139	http://lgt.igs.umaryland.edu/traces/73892139_172343_ABC9_3_5_000043971600_L9.html	http://trace.ncbi.nlm.nih.gov/Traces/trace.cgi?&cmd=retrieve&val=TRACE_NAME='73892139' and TEMPLATE_ID='172343_ABC9_3_5_000043971600_L9'&dopt=trace&size=1&seeas=Show	Bordetella,Delftia,Pseudomonas	206	7e-89	NA18956	ABC	Human_NA18956	ABC9_3_5		2006-03-16	ZW	45283100	l9	WGA
		170215_ABC9_3_2_000041257000_P10	170215_ABC9_3_2_000041257000_P10	F	70395028	http://lgt.igs.umaryland.edu/traces/70395028_170215_ABC9_3_2_000041257000_P10.html	http://trace.ncbi.nlm.nih.gov/Traces/trace.cgi?&cmd=retrieve&val=TRACE_NAME='70395028' and TEMPLATE_ID='170215_ABC9_3_2_000041257000_P10'&dopt=trace&size=1&seeas=Show	Bordetella,Delftia,Pseudomonas	368	0	NA18956	ABC	Human_NA18956	ABC9_3_2		2006-02-11	ZG	45072200	p10	WGA
	Bordetella,uncultured
		165532_ABC7_000042458800_F4	165532_ABC7_000042458800_F4	F	59343446	http://lgt.igs.umaryland.edu/traces/59343446_165532_ABC7_000042458800_F4.html	http://trace.ncbi.nlm.nih.gov/Traces/trace.cgi?&cmd=retrieve&val=TRACE_NAME='59343446' and TEMPLATE_ID='165532_ABC7_000042458800_F4'&dopt=trace&size=1&seeas=Show	Bordetella,uncultured	131	2e-46	NA18517	ABC	Human_NA18517	ABC7		2005-09-11	AD	40795500	f4	WGA
	Bradyrhizobium
		XSNP51833-40j02		R	XSNP51833-40j02.q1k	http://lgt.igs.umaryland.edu/traces/XSNP51833-40j02.q1k_XSNP51833-40j02.html	http://trace.ncbi.nlm.nih.gov/Traces/trace.cgi?&cmd=retrieve&val=TRACE_NAME='XSNP51833-40j02.q1k' and TEMPLATE_ID='XSNP51833-40j02'&dopt=trace&size=1&seeas=Show	Bradyrhizobium	338	0	NA17119	SC	Chr_X_17119	51833		2002-11-24		XSNP51833-40	j02	SNP
		XSNP51152-210d20		F	XSNP51152-210d20.p1k	http://lgt.igs.umaryland.edu/traces/XSNP51152-210d20.p1k_XSNP51152-210d20.html	http://trace.ncbi.nlm.nih.gov/Traces/trace.cgi?&cmd=retrieve&val=TRACE_NAME='XSNP51152-210d20.p1k' and TEMPLATE_ID='XSNP51152-210d20'&dopt=trace&size=1&seeas=Show	Bradyrhizobium	333	5e-179	NA17119	SC	Chr_X_17119	51152		2002-09-02		XSNP51152-210	d20	SNP
		166910_ABC8_000042119600_A11	166910_ABC8_000042119600_A11	R	63388155	http://lgt.igs.umaryland.edu/traces/63388155_166910_ABC8_000042119600_A11.html	http://trace.ncbi.nlm.nih.gov/Traces/trace.cgi?&cmd=retrieve&val=TRACE_NAME='63388155' and TEMPLATE_ID='166910_ABC8_000042119600_A11'&dopt=trace&size=1&seeas=Show	Bradyrhizobium	263	1e-84	NA18507	ABC	Human_NA18507	ABC8		2005-11-06	ZB	43266100	a11	WGA
		20SNP45079-466a03		F	20SNP45079-466a03.p1c	http://lgt.igs.umaryland.edu/traces/20SNP45079-466a03.p1c_20SNP45079-466a03.html	http://trace.ncbi.nlm.nih.gov/Traces/trace.cgi?&cmd=retrieve&val=TRACE_NAME='20SNP45079-466a03.p1c' and TEMPLATE_ID='20SNP45079-466a03'&dopt=trace&size=1&seeas=Show	Bradyrhizobium	371	0	NA10470	SC		45079		2002-03-24		20SNP45079-466	a03	SNP
		22S17119-158l18		F	22S17119-158l18.p1k	http://lgt.igs.umaryland.edu/traces/22S17119-158l18.p1k_22S17119-158l18.html	http://trace.ncbi.nlm.nih.gov/Traces/trace.cgi?&cmd=retrieve&val=TRACE_NAME='22S17119-158l18.p1k' and TEMPLATE_ID='22S17119-158l18'&dopt=trace&size=1&seeas=Show	Bradyrhizobium	147	5e-75	NA17119	SC	Chr_22_17119	60797		2003-05-08		22S17119-158	l18	SNP
		22S17119-196p03		F	22S17119-196p03.p1k	http://lgt.igs.umaryland.edu/traces/22S17119-196p03.p1k_22S17119-196p03.html	http://trace.ncbi.nlm.nih.gov/Traces/trace.cgi?&cmd=retrieve&val=TRACE_NAME='22S17119-196p03.p1k' and TEMPLATE_ID='22S17119-196p03'&dopt=trace&size=1&seeas=Show	Bradyrhizobium	197	5e-81	NA17119	SC	Chr_22_17119	60797		2003-05-11		22S17119-196	p03	SNP
		22S17119-189j17		R	22S17119-189j17.q1k	http://lgt.igs.umaryland.edu/traces/22S17119-189j17.q1k_22S17119-189j17.html	http://trace.ncbi.nlm.nih.gov/Traces/trace.cgi?&cmd=retrieve&val=TRACE_NAME='22S17119-189j17.q1k' and TEMPLATE_ID='22S17119-189j17'&dopt=trace&size=1&seeas=Show	Bradyrhizobium	431	0	NA17119	SC	Chr_22_17119	60797		2003-05-07		22S17119-189	j17	SNP
		22SNP11321-9n17		R	22SNP11321-9n17.q1k	http://lgt.igs.umaryland.edu/traces/22SNP11321-9n17.q1k_22SNP11321-9n17.html	http://trace.ncbi.nlm.nih.gov/Traces/trace.cgi?&cmd=retrieve&val=TRACE_NAME='22SNP11321-9n17.q1k' and TEMPLATE_ID='22SNP11321-9n17'&dopt=trace&size=1&seeas=Show	Bradyrhizobium	182	1e-88	NA11321	SC	Chr_22_11321	55701		2002-12-30		22SNP11321-9	n17	SNP
		166910_ABC8_000042077300_F23	166910_ABC8_000042077300_F23	R	63067954	http://lgt.igs.umaryland.edu/traces/63067954_166910_ABC8_000042077300_F23.html	http://trace.ncbi.nlm.nih.gov/Traces/trace.cgi?&cmd=retrieve&val=TRACE_NAME='63067954' and TEMPLATE_ID='166910_ABC8_000042077300_F23'&dopt=trace&size=1&seeas=Show	Bradyrhizobium	130	5e-65	NA18507	ABC	Human_NA18507	ABC8		2005-11-01	ZK	43163800	f23	WGA
		tpp46c03		R	tpp46c03.g1	http://lgt.igs.umaryland.edu/traces/tpp46c03.g1_tpp46c03.html	http://trace.ncbi.nlm.nih.gov/Traces/trace.cgi?&cmd=retrieve&val=TRACE_NAME='tpp46c03.g1' and TEMPLATE_ID='tpp46c03'&dopt=trace&size=1&seeas=Show	Bradyrhizobium	309	4e-162		WUGSC	H_AJCHROM2015		0j005R	2003-08-26	824	tpp46	c03	WCS
		Chr_13_17119_2-308n22		R	Chr_13_17119_2-308n22.q1k	http://lgt.igs.umaryland.edu/traces/Chr_13_17119_2-308n22.q1k_Chr_13_17119_2-308n22.html	http://trace.ncbi.nlm.nih.gov/Traces/trace.cgi?&cmd=retrieve&val=TRACE_NAME='Chr_13_17119_2-308n22.q1k' and TEMPLATE_ID='Chr_13_17119_2-308n22'&dopt=trace&size=1&seeas=Show	Bradyrhizobium	467	0	NA17119	SC	Chr_13_17119	60721		2003-06-14		Chr_13_17119_2-308	n22	SNP
	Burkholderia
		171417_ABC10_2_1_000045512700_J20	171417_ABC10_2_1_000045512700_J20	F	76328912	http://lgt.igs.umaryland.edu/traces/76328912_171417_ABC10_2_1_000045512700_J20.html	http://trace.ncbi.nlm.nih.gov/Traces/trace.cgi?&cmd=retrieve&val=TRACE_NAME='76328912' and TEMPLATE_ID='171417_ABC10_2_1_000045512700_J20'&dopt=trace&size=1&seeas=Show	Burkholderia	416	2e-163	NA19240	ABC	Human_NA19240	ABC10_2_1		2006-04-05	AB	43449600	j20	WGA
		173650_ABC10_2_1_000044480300_C3	173650_ABC10_2_1_000044480300_C3	F	77663550	http://lgt.igs.umaryland.edu/traces/77663550_173650_ABC10_2_1_000044480300_C3.html	http://trace.ncbi.nlm.nih.gov/Traces/trace.cgi?&cmd=retrieve&val=TRACE_NAME='77663550' and TEMPLATE_ID='173650_ABC10_2_1_000044480300_C3'&dopt=trace&size=1&seeas=Show	Burkholderia	410	1e-164	NA19240	ABC	Human_NA19240	ABC10_2_1		2006-04-18	ZT	43618500	c3	WGA
		HWWHP565396		R	50756875	http://lgt.igs.umaryland.edu/traces/50756875_HWWHP565396.html	http://trace.ncbi.nlm.nih.gov/Traces/trace.cgi?&cmd=retrieve&val=TRACE_NAME='50756875' and TEMPLATE_ID='HWWHP565396'&dopt=trace&size=1&seeas=Show	Burkholderia	158	3e-48		BCM	HWWH	HWWHP	675520	2003-03-20	fin	HWWHP1E565300
		165972_ABC8_000043003700_N11	165972_ABC8_000043003700_N11	F	61515093	http://lgt.igs.umaryland.edu/traces/61515093_165972_ABC8_000043003700_N11.html	http://trace.ncbi.nlm.nih.gov/Traces/trace.cgi?&cmd=retrieve&val=TRACE_NAME='61515093' and TEMPLATE_ID='165972_ABC8_000043003700_N11'&dopt=trace&size=1&seeas=Show	Burkholderia	167	3e-51	NA18507	ABC	Human_NA18507	ABC8		2005-10-01	ZT	42613100	n11	WGA
		165807_ABC8_000005713149_J8	165807_ABC8_000005713149_J8	F	60828638	http://lgt.igs.umaryland.edu/traces/60828638_165807_ABC8_000005713149_J8.html	http://trace.ncbi.nlm.nih.gov/Traces/trace.cgi?&cmd=retrieve&val=TRACE_NAME='60828638' and TEMPLATE_ID='165807_ABC8_000005713149_J8'&dopt=trace&size=1&seeas=Show	Burkholderia	221	7e-67	NA18507	ABC	Human_NA18507	ABC8		2005-09-24	ZH	5753749	j8	WGA
	Burkholderia,Citrobacter,Enterobacter,Pseudomonas,Xanthomonas
		HEOFP2711	RP11-88I21	R	38781267	http://lgt.igs.umaryland.edu/traces/38781267_HEOFP2711.html	http://trace.ncbi.nlm.nih.gov/Traces/trace.cgi?&cmd=retrieve&val=TRACE_NAME='38781267' and TEMPLATE_ID='HEOFP2711'&dopt=trace&size=1&seeas=Show	Burkholderia,Citrobacter,Enterobacter,Pseudomonas,Xanthomonas	347	0		BCM	HEOF	HEOFP	531886	2002-10-18	can	HEOFP1E2700
	Burkholderia,Cupriavidus
		174222_ABC10_2_1_000044555800_M10	174222_ABC10_2_1_000044555800_M10	F	79084785	http://lgt.igs.umaryland.edu/traces/79084785_174222_ABC10_2_1_000044555800_M10.html	http://trace.ncbi.nlm.nih.gov/Traces/trace.cgi?&cmd=retrieve&val=TRACE_NAME='79084785' and TEMPLATE_ID='174222_ABC10_2_1_000044555800_M10'&dopt=trace&size=1&seeas=Show	Burkholderia,Cupriavidus	219	5e-118	NA19240	ABC	Human_NA19240	ABC10_2_1		2006-05-02	AE	44362500	m10	WGA
	Caulobacter
		171515_ABC9_3_5_000046184500_N16	171515_ABC9_3_5_000046184500_N16	F	73155933	http://lgt.igs.umaryland.edu/traces/73155933_171515_ABC9_3_5_000046184500_N16.html	http://trace.ncbi.nlm.nih.gov/Traces/trace.cgi?&cmd=retrieve&val=TRACE_NAME='73155933' and TEMPLATE_ID='171515_ABC9_3_5_000046184500_N16'&dopt=trace&size=1&seeas=Show	Caulobacter	425	3e-150	NA18956	ABC	Human_NA18956	ABC9_3_5		2006-03-10	ZU	46201500	n16	WGA
		172343_ABC9_3_5_000043997500_G16	172343_ABC9_3_5_000043997500_G16	F	74521301	http://lgt.igs.umaryland.edu/traces/74521301_172343_ABC9_3_5_000043997500_G16.html	http://trace.ncbi.nlm.nih.gov/Traces/trace.cgi?&cmd=retrieve&val=TRACE_NAME='74521301' and TEMPLATE_ID='172343_ABC9_3_5_000043997500_G16'&dopt=trace&size=1&seeas=Show	Caulobacter	429	3e-162	NA18956	ABC	Human_NA18956	ABC9_3_5		2006-03-21	ZH	46292100	g16	WGA
		170215_ABC9_3_2_000043861100_H13	170215_ABC9_3_2_000043861100_H13	R	71509160	http://lgt.igs.umaryland.edu/traces/71509160_170215_ABC9_3_2_000043861100_H13.html	http://trace.ncbi.nlm.nih.gov/Traces/trace.cgi?&cmd=retrieve&val=TRACE_NAME='71509160' and TEMPLATE_ID='170215_ABC9_3_2_000043861100_H13'&dopt=trace&size=1&seeas=Show	Caulobacter	118	4e-41	NA18956	ABC	Human_NA18956	ABC9_3_2		2006-02-22	ZS	45209300	h13	WGA
		170215_ABC9_3_2_000043815900_D20	170215_ABC9_3_2_000043815900_D20	R	70923442	http://lgt.igs.umaryland.edu/traces/70923442_170215_ABC9_3_2_000043815900_D20.html	http://trace.ncbi.nlm.nih.gov/Traces/trace.cgi?&cmd=retrieve&val=TRACE_NAME='70923442' and TEMPLATE_ID='170215_ABC9_3_2_000043815900_D20'&dopt=trace&size=1&seeas=Show	Caulobacter	118	4e-41	NA18956	ABC	Human_NA18956	ABC9_3_2		2006-02-17	ZM	45935200	d20	WGA
	Citrobacter,Serratia
		168825_ABC8_4_1_000041089500_F17	168825_ABC8_4_1_000041089500_F17	F	67163713	http://lgt.igs.umaryland.edu/traces/67163713_168825_ABC8_4_1_000041089500_F17.html	http://trace.ncbi.nlm.nih.gov/Traces/trace.cgi?&cmd=retrieve&val=TRACE_NAME='67163713' and TEMPLATE_ID='168825_ABC8_4_1_000041089500_F17'&dopt=trace&size=1&seeas=Show	Citrobacter,Serratia	219	1e-84	NA18507	ABC	Human_NA18507	ABC8_4_1		2006-01-03	AD	45627900	f17	WGA
	Clostridium
		S213P60421H11		F	S213P60421FH11.T0	http://lgt.igs.umaryland.edu/traces/S213P60421FH11.T0_S213P60421H11.html	http://trace.ncbi.nlm.nih.gov/Traces/trace.cgi?&cmd=retrieve&val=TRACE_NAME='S213P60421FH11.T0' and TEMPLATE_ID='S213P60421H11'&dopt=trace&size=1&seeas=Show	Clostridium	153	8e-40		WIBR	S213					S213P60421	h11	WGS
	Comamonas
		171515_ABC9_3_5_000043906100_K22	171515_ABC9_3_5_000043906100_K22	F	72536902	http://lgt.igs.umaryland.edu/traces/72536902_171515_ABC9_3_5_000043906100_K22.html	http://trace.ncbi.nlm.nih.gov/Traces/trace.cgi?&cmd=retrieve&val=TRACE_NAME='72536902' and TEMPLATE_ID='171515_ABC9_3_5_000043906100_K22'&dopt=trace&size=1&seeas=Show	Comamonas	223	7e-80	NA18956	ABC	Human_NA18956	ABC9_3_5		2006-03-04	ZX	46121300	k22	WGA
		172343_ABC9_3_5_000043967100_D23	172343_ABC9_3_5_000043967100_D23	F	73874231	http://lgt.igs.umaryland.edu/traces/73874231_172343_ABC9_3_5_000043967100_D23.html	http://trace.ncbi.nlm.nih.gov/Traces/trace.cgi?&cmd=retrieve&val=TRACE_NAME='73874231' and TEMPLATE_ID='172343_ABC9_3_5_000043967100_D23'&dopt=trace&size=1&seeas=Show	Comamonas	172	2e-80	NA18956	ABC	Human_NA18956	ABC9_3_5		2006-03-15	ZY	45288600	d23	WGA
		HDTAP0152	RP11-657G2	R	HDTAP1E0152A	http://lgt.igs.umaryland.edu/traces/HDTAP1E0152A_HDTAP0152.html	http://trace.ncbi.nlm.nih.gov/Traces/trace.cgi?&cmd=retrieve&val=TRACE_NAME='HDTAP1E0152A' and TEMPLATE_ID='HDTAP0152'&dopt=trace&size=1&seeas=Show	Comamonas	108	7e-40		BCM	HDTA		306961	2002-01-19	nyk	HDTAP1E0100		Clone
		165654_ABC7_000042485700_J19	165654_ABC7_000042485700_J19	R	59875999	http://lgt.igs.umaryland.edu/traces/59875999_165654_ABC7_000042485700_J19.html	http://trace.ncbi.nlm.nih.gov/Traces/trace.cgi?&cmd=retrieve&val=TRACE_NAME='59875999' and TEMPLATE_ID='165654_ABC7_000042485700_J19'&dopt=trace&size=1&seeas=Show	Comamonas	265	2e-107	NA18517	ABC	Human_NA18517	ABC7		2005-09-16	AG	42927300	j19	WGA
		170143_ABC8_4_1_000041163000_E11	170143_ABC8_4_1_000041163000_E11	F	68445859	http://lgt.igs.umaryland.edu/traces/68445859_170143_ABC8_4_1_000041163000_E11.html	http://trace.ncbi.nlm.nih.gov/Traces/trace.cgi?&cmd=retrieve&val=TRACE_NAME='68445859' and TEMPLATE_ID='170143_ABC8_4_1_000041163000_E11'&dopt=trace&size=1&seeas=Show	Comamonas	129	2e-33	NA18507	ABC	Human_NA18507	ABC8_4_1		2006-01-22	ZU	44982800	e11	WGA
		172343_ABC9_000044014200_B11	172343_ABC9_000044014200_B11	R	75086708	http://lgt.igs.umaryland.edu/traces/75086708_172343_ABC9_000044014200_B11.html	http://trace.ncbi.nlm.nih.gov/Traces/trace.cgi?&cmd=retrieve&val=TRACE_NAME='75086708' and TEMPLATE_ID='172343_ABC9_000044014200_B11'&dopt=trace&size=1&seeas=Show	Comamonas	294	4e-158	NA18956	ABC	Human_NA18956	ABC9		2006-03-25	AK	45403700	b11	WGA
		172343_ABC9_3_5_000043349000_I6	172343_ABC9_3_5_000043349000_I6	R	75778984	http://lgt.igs.umaryland.edu/traces/75778984_172343_ABC9_3_5_000043349000_I6.html	http://trace.ncbi.nlm.nih.gov/Traces/trace.cgi?&cmd=retrieve&val=TRACE_NAME='75778984' and TEMPLATE_ID='172343_ABC9_3_5_000043349000_I6'&dopt=trace&size=1&seeas=Show	Comamonas	312	2e-166	NA18956	ABC	Human_NA18956	ABC9_3_5		2006-03-31	ZX	43376800	i6	WGA
		168825_ABC8_4_1_000041093700_H20	168825_ABC8_4_1_000041093700_H20	R	67191058	http://lgt.igs.umaryland.edu/traces/67191058_168825_ABC8_4_1_000041093700_H20.html	http://trace.ncbi.nlm.nih.gov/Traces/trace.cgi?&cmd=retrieve&val=TRACE_NAME='67191058' and TEMPLATE_ID='168825_ABC8_4_1_000041093700_H20'&dopt=trace&size=1&seeas=Show	Comamonas	172	4e-35	NA18507	ABC	Human_NA18507	ABC8_4_1		2006-01-04	ZG	43708400	h20	WGA
		165434_ABC7_000042446500_F8	165434_ABC7_000042446500_F8	R	59357572	http://lgt.igs.umaryland.edu/traces/59357572_165434_ABC7_000042446500_F8.html	http://trace.ncbi.nlm.nih.gov/Traces/trace.cgi?&cmd=retrieve&val=TRACE_NAME='59357572' and TEMPLATE_ID='165434_ABC7_000042446500_F8'&dopt=trace&size=1&seeas=Show	Cronobacter	147	1e-58	NA18517	ABC	Human_NA18517	ABC7		2005-09-11	AF	40776200	f8	WGA
	Cupriavidus
		HAKFH0049A	RP11-684O24	R	HAKFH1E0049A	http://lgt.igs.umaryland.edu/traces/HAKFH1E0049A_HAKFH0049A.html	http://trace.ncbi.nlm.nih.gov/Traces/trace.cgi?&cmd=retrieve&val=TRACE_NAME='HAKFH1E0049A' and TEMPLATE_ID='HAKFH0049A'&dopt=trace&size=1&seeas=Show	Cupriavidus	190	1e-81		BCM	HAKF		161699		crc	HAKFH1E0000		Clone
	Dechloromonas
		165570_ABC7_000042472700_K1	165570_ABC7_000042472700_K1	R	59505950	http://lgt.igs.umaryland.edu/traces/59505950_165570_ABC7_000042472700_K1.html	http://trace.ncbi.nlm.nih.gov/Traces/trace.cgi?&cmd=retrieve&val=TRACE_NAME='59505950' and TEMPLATE_ID='165570_ABC7_000042472700_K1'&dopt=trace&size=1&seeas=Show	Dechloromonas	298	2e-110	NA18517	ABC	Human_NA18517	ABC7		2005-09-12	ZI	42816900	k1	WGA
	Delftia
		HEWWP2957	YRM2019	F	80362064	http://lgt.igs.umaryland.edu/traces/80362064_HEWWP2957.html	http://trace.ncbi.nlm.nih.gov/Traces/trace.cgi?&cmd=retrieve&val=TRACE_NAME='80362064' and TEMPLATE_ID='HEWWP2957'&dopt=trace&size=1&seeas=Show	Delftia	549	0		BCM	HEWW	HEWWP	1047859	2004-03-30	dmr	HEWWP1D2900
		HEOGP0361	RP11-144M21	R	38383809	http://lgt.igs.umaryland.edu/traces/38383809_HEOGP0361.html	http://trace.ncbi.nlm.nih.gov/Traces/trace.cgi?&cmd=retrieve&val=TRACE_NAME='38383809' and TEMPLATE_ID='HEOGP0361'&dopt=trace&size=1&seeas=Show	Delftia	109	2e-21		BCM	HEOG	HEOGP	527057	2002-10-12	tex	HEOGP1E0300
		HEOGP0361	RP11-144M21	R	38388238	http://lgt.igs.umaryland.edu/traces/38388238_HEOGP0361.html	http://trace.ncbi.nlm.nih.gov/Traces/trace.cgi?&cmd=retrieve&val=TRACE_NAME='38388238' and TEMPLATE_ID='HEOGP0361'&dopt=trace&size=1&seeas=Show	Delftia	108	1e-20		BCM	HEOG	HEOGP	527103	2002-10-12	jam	HEOGP2E0300
		174552_ABC10_2_1_000046676400_M4	174552_ABC10_2_1_000046676400_M4	R	81854697	http://lgt.igs.umaryland.edu/traces/81854697_174552_ABC10_2_1_000046676400_M4.html	http://trace.ncbi.nlm.nih.gov/Traces/trace.cgi?&cmd=retrieve&val=TRACE_NAME='81854697' and TEMPLATE_ID='174552_ABC10_2_1_000046676400_M4'&dopt=trace&size=1&seeas=Show	Delftia	197	5e-93	NA19240	ABC	Human_NA19240	ABC10_2_1		2006-05-28	AH	48995200	m4	WGA
		174779_ABC12_000046787100_J10	174779_ABC12_000046787100_J10	F	83314643	http://lgt.igs.umaryland.edu/traces/83314643_174779_ABC12_000046787100_J10.html	http://trace.ncbi.nlm.nih.gov/Traces/trace.cgi?&cmd=retrieve&val=TRACE_NAME='83314643' and TEMPLATE_ID='174779_ABC12_000046787100_J10'&dopt=trace&size=1&seeas=Show	Delftia	110	5e-53	NA12878	ABC	Human_NA12878	ABC12		2006-06-09	AA	46777700	j10	WGA
		163460_ABC7_000040592900_A3	ABC7_000040592900_A3	F	55042165	http://lgt.igs.umaryland.edu/traces/55042165_163460_ABC7_000040592900_A3.html	http://trace.ncbi.nlm.nih.gov/Traces/trace.cgi?&cmd=retrieve&val=TRACE_NAME='55042165' and TEMPLATE_ID='163460_ABC7_000040592900_A3'&dopt=trace&size=1&seeas=Show	Delftia	174	1e-50	NA18517	ABC	Human_NA18517	ABC7		2005-06-22	ZV	41714600	a3	WGA
	Delftia,Leptothrix
		H_HD-0297E24	ABC18-297E24	R	H_HD-0297E24.g1	http://lgt.igs.umaryland.edu/traces/H_HD-0297E24.g1_H_HD-0297E24.html	http://trace.ncbi.nlm.nih.gov/Traces/trace.cgi?&cmd=retrieve&val=TRACE_NAME='H_HD-0297E24.g1' and TEMPLATE_ID='H_HD-0297E24'&dopt=trace&size=1&seeas=Show	Delftia,Leptothrix	140	6e-28	NA10847	WUGSC	H_HD-07-10-05	2181626703	0j008O	2007-10-04	846	2h07I9	e24	CloneEnd
	Diaphorobacter
		163460_ABC7_000040612200_K19	ABC7_000040612200_K19	R	55685882	http://lgt.igs.umaryland.edu/traces/55685882_163460_ABC7_000040612200_K19.html	http://trace.ncbi.nlm.nih.gov/Traces/trace.cgi?&cmd=retrieve&val=TRACE_NAME='55685882' and TEMPLATE_ID='163460_ABC7_000040612200_K19'&dopt=trace&size=1&seeas=Show	Diaphorobacter	246	2e-117	NA18517	ABC	Human_NA18517	ABC7		2005-07-17	ZK	41753900	k19	WGA
	Dickeya
		HWWHP829164		F	52053837	http://lgt.igs.umaryland.edu/traces/52053837_HWWHP829164.html	http://trace.ncbi.nlm.nih.gov/Traces/trace.cgi?&cmd=retrieve&val=TRACE_NAME='52053837' and TEMPLATE_ID='HWWHP829164'&dopt=trace&size=1&seeas=Show	Dickeya	185	4e-50		BCM	HWWH	HWWHP	691526	2003-04-04	col	HWWHP1D829100
	Enterobacter
		172343_ABC9_3_5_000045366200_P7	172343_ABC9_3_5_000045366200_P7	R	74946993	http://lgt.igs.umaryland.edu/traces/74946993_172343_ABC9_3_5_000045366200_P7.html	http://trace.ncbi.nlm.nih.gov/Traces/trace.cgi?&cmd=retrieve&val=TRACE_NAME='74946993' and TEMPLATE_ID='172343_ABC9_3_5_000045366200_P7'&dopt=trace&size=1&seeas=Show	Enterobacter	373	0	NA18956	ABC	Human_NA18956	ABC9_3_5		2006-03-23	AF	45385600	p7	WGA
		170215_ABC9_3_2_000043882300_K10	170215_ABC9_3_2_000043882300_K10	R	72073654	http://lgt.igs.umaryland.edu/traces/72073654_170215_ABC9_3_2_000043882300_K10.html	http://trace.ncbi.nlm.nih.gov/Traces/trace.cgi?&cmd=retrieve&val=TRACE_NAME='72073654' and TEMPLATE_ID='170215_ABC9_3_2_000043882300_K10'&dopt=trace&size=1&seeas=Show	Enterobacter	138	1e-62	NA18956	ABC	Human_NA18956	ABC9_3_2		2006-03-01	ZK	46025700	k10	WGA
		170215_ABC9_3_2_000043845000_H20	170215_ABC9_3_2_000043845000_H20	F	71279120	http://lgt.igs.umaryland.edu/traces/71279120_170215_ABC9_3_2_000043845000_H20.html	http://trace.ncbi.nlm.nih.gov/Traces/trace.cgi?&cmd=retrieve&val=TRACE_NAME='71279120' and TEMPLATE_ID='170215_ABC9_3_2_000043845000_H20'&dopt=trace&size=1&seeas=Show	Enterobacter	247	2e-132	NA18956	ABC	Human_NA18956	ABC9_3_2		2006-02-20	ZF	45975400	h20	WGA
		167098_ABC8_000041790300_N11	167098_ABC8_000041790300_N11	F	64786212	http://lgt.igs.umaryland.edu/traces/64786212_167098_ABC8_000041790300_N11.html	http://trace.ncbi.nlm.nih.gov/Traces/trace.cgi?&cmd=retrieve&val=TRACE_NAME='64786212' and TEMPLATE_ID='167098_ABC8_000041790300_N11'&dopt=trace&size=1&seeas=Show	Enterococcus	174	8e-51	NA18507	ABC	Human_NA18507	ABC8		2005-11-28	ZK	42196200	n11	WGA
		HAQID0180	RP11-507N20	R	40716393	http://lgt.igs.umaryland.edu/traces/40716393_HAQID0180.html	http://trace.ncbi.nlm.nih.gov/Traces/trace.cgi?&cmd=retrieve&val=TRACE_NAME='40716393' and TEMPLATE_ID='HAQID0180'&dopt=trace&size=1&seeas=Show	Enterococcus	178	5e-84		BCM	HAQI	HAQID	556262	2002-11-16	org	HAQID1E0100
		HEQGP0316	RP11-179J2	R	39084436	http://lgt.igs.umaryland.edu/traces/39084436_HEQGP0316.html	http://trace.ncbi.nlm.nih.gov/Traces/trace.cgi?&cmd=retrieve&val=TRACE_NAME='39084436' and TEMPLATE_ID='HEQGP0316'&dopt=trace&size=1&seeas=Show	Enterococcus	215	3e-94		BCM	HEQG	HEQGP	535898	2002-10-23	mne	HEQGP1E0300
		HEQLP1239	RP11-347D6	R	39403848	http://lgt.igs.umaryland.edu/traces/39403848_HEQLP1239.html	http://trace.ncbi.nlm.nih.gov/Traces/trace.cgi?&cmd=retrieve&val=TRACE_NAME='39403848' and TEMPLATE_ID='HEQLP1239'&dopt=trace&size=1&seeas=Show	Enterococcus	106	2e-43		BCM	HEQL	HEQLP	540098	2002-10-28	crc	HEQLP1E1200
		HEQPP1542	RP11-519B15	F	39506289	http://lgt.igs.umaryland.edu/traces/39506289_HEQPP1542.html	http://trace.ncbi.nlm.nih.gov/Traces/trace.cgi?&cmd=retrieve&val=TRACE_NAME='39506289' and TEMPLATE_ID='HEQPP1542'&dopt=trace&size=1&seeas=Show	Enterococcus	248	2e-104		BCM	HEQP	HEQPP	541235	2002-10-29	lsa	HEQPP1D1500
		HMQRD0181	RP11-166N6	F	39692804	http://lgt.igs.umaryland.edu/traces/39692804_HMQRD0181.html	http://trace.ncbi.nlm.nih.gov/Traces/trace.cgi?&cmd=retrieve&val=TRACE_NAME='39692804' and TEMPLATE_ID='HMQRD0181'&dopt=trace&size=1&seeas=Show	Enterococcus	101	4e-26		BCM	HMQR	HMQRD	543702	2002-11-01	nda	HMQRD1D0100
	Geobacillus
		1061018299595		F	1099405803958	http://lgt.igs.umaryland.edu/traces/1099405803958_1061018299595.html	http://trace.ncbi.nlm.nih.gov/Traces/trace.cgi?&cmd=retrieve&val=TRACE_NAME='1099405803958' and TEMPLATE_ID='1061018299595'&dopt=trace&size=1&seeas=Show	Geobacillus	381	5e-143		JCVI	Genomic-Sequencing-Diploid-Human-Reference-Genome	Genomic-Sequencing-Diploid-Human-Reference-Genome_HuRef-F-11-40Kb	1064039862068	2005-10-17		F032132	k13	WGA
	Herminiimonas
		HWWIP368518		F	56835883	http://lgt.igs.umaryland.edu/traces/56835883_HWWIP368518.html	http://trace.ncbi.nlm.nih.gov/Traces/trace.cgi?&cmd=retrieve&val=TRACE_NAME='56835883' and TEMPLATE_ID='HWWIP368518'&dopt=trace&size=1&seeas=Show	Herminiimonas	212	1e-94		BCM	HWWI	HWWIP	751360	2003-05-28	sla	HWWIP1D368500
	Janthinobacterium
		166791_ABC7_000043069600_A9	166791_ABC7_000043069600_A9	R	62452563	http://lgt.igs.umaryland.edu/traces/62452563_166791_ABC7_000043069600_A9.html	http://trace.ncbi.nlm.nih.gov/Traces/trace.cgi?&cmd=retrieve&val=TRACE_NAME='62452563' and TEMPLATE_ID='166791_ABC7_000043069600_A9'&dopt=trace&size=1&seeas=Show	Janthinobacterium	321	1e-164	NA18517	ABC	Human_NA18517	ABC7		2005-10-17	ZJ	42700900	a9	WGA
	Klebsiella
		167000_ABC8_000002607440_L9	167000_ABC8_000002607440_L9	F	63667926	http://lgt.igs.umaryland.edu/traces/63667926_167000_ABC8_000002607440_L9.html	http://trace.ncbi.nlm.nih.gov/Traces/trace.cgi?&cmd=retrieve&val=TRACE_NAME='63667926' and TEMPLATE_ID='167000_ABC8_000002607440_L9'&dopt=trace&size=1&seeas=Show	Klebsiella	205	7e-55	NA18507	ABC	Human_NA18507	ABC8		2005-11-11	ZJ	2639340	l9	WGA
		166910_ABC8_000043242000_M7	166910_ABC8_000043242000_M7	R	63480647	http://lgt.igs.umaryland.edu/traces/63480647_166910_ABC8_000043242000_M7.html	http://trace.ncbi.nlm.nih.gov/Traces/trace.cgi?&cmd=retrieve&val=TRACE_NAME='63480647' and TEMPLATE_ID='166910_ABC8_000043242000_M7'&dopt=trace&size=1&seeas=Show	Klebsiella	176	1e-87	NA18507	ABC	Human_NA18507	ABC8		2005-11-07	AA	43278400	m7	WGA
		1090218332729		R	1094837904408	http://lgt.igs.umaryland.edu/traces/1094837904408_1090218332729.html	http://trace.ncbi.nlm.nih.gov/Traces/trace.cgi?&cmd=retrieve&val=TRACE_NAME='1094837904408' and TEMPLATE_ID='1090218332729'&dopt=trace&size=1&seeas=Show	Klebsiella	131	2e-65		JCVI	Genomic-Sequencing-Diploid-Human-Reference-Genome	Genomic-Sequencing-Diploid-Human-Reference-Genome_T14117-JB-11-14KB	1090620586063			A300MSQ4	n02	WGA
	Lactobacillus
		166791_ABC7_000043071100_P16	166791_ABC7_000043071100_P16	F	62527730	http://lgt.igs.umaryland.edu/traces/62527730_166791_ABC7_000043071100_P16.html	http://trace.ncbi.nlm.nih.gov/Traces/trace.cgi?&cmd=retrieve&val=TRACE_NAME='62527730' and TEMPLATE_ID='166791_ABC7_000043071100_P16'&dopt=trace&size=1&seeas=Show	Lactobacillus	296	3e-159	NA18517	ABC	Human_NA18517	ABC7		2005-10-18	ZY	42783500	p16	WGA
		166320_ABC7_000000497622_P13	166320_ABC7_000000497622_P13	F	61929522	http://lgt.igs.umaryland.edu/traces/61929522_166320_ABC7_000000497622_P13.html	http://trace.ncbi.nlm.nih.gov/Traces/trace.cgi?&cmd=retrieve&val=TRACE_NAME='61929522' and TEMPLATE_ID='166320_ABC7_000000497622_P13'&dopt=trace&size=1&seeas=Show	Lactobacillus	278	2e-141	NA18517	ABC	Human_NA18517	ABC7		2005-10-08	ZV	525522	p13	WGA
		166752_ABC7_000043061500_D23	166752_ABC7_000043061500_D23	R	62303698	http://lgt.igs.umaryland.edu/traces/62303698_166752_ABC7_000043061500_D23.html	http://trace.ncbi.nlm.nih.gov/Traces/trace.cgi?&cmd=retrieve&val=TRACE_NAME='62303698' and TEMPLATE_ID='166752_ABC7_000043061500_D23'&dopt=trace&size=1&seeas=Show	Lactobacillus	475	0	NA18517	ABC	Human_NA18517	ABC7		2005-10-14	ZR	42735000	d23	WGA
		166752_ABC7_000043059900_C10	166752_ABC7_000043059900_C10	R	62310016	http://lgt.igs.umaryland.edu/traces/62310016_166752_ABC7_000043059900_C10.html	http://trace.ncbi.nlm.nih.gov/Traces/trace.cgi?&cmd=retrieve&val=TRACE_NAME='62310016' and TEMPLATE_ID='166752_ABC7_000043059900_C10'&dopt=trace&size=1&seeas=Show	Lactobacillus	254	2e-117	NA18517	ABC	Human_NA18517	ABC7		2005-10-15	ZE	42731700	c10	WGA
		166377_ABC7_000000480622_N19	166377_ABC7_000000480622_N19	R	61915217	http://lgt.igs.umaryland.edu/traces/61915217_166377_ABC7_000000480622_N19.html	http://trace.ncbi.nlm.nih.gov/Traces/trace.cgi?&cmd=retrieve&val=TRACE_NAME='61915217' and TEMPLATE_ID='166377_ABC7_000000480622_N19'&dopt=trace&size=1&seeas=Show	Lactobacillus	137	9e-67	NA18517	ABC	Human_NA18517	ABC7		2005-10-07	ZH	524122	n19	WGA
		166671_ABC7_000043051100_F11	166671_ABC7_000043051100_F11	F	62260353	http://lgt.igs.umaryland.edu/traces/62260353_166671_ABC7_000043051100_F11.html	http://trace.ncbi.nlm.nih.gov/Traces/trace.cgi?&cmd=retrieve&val=TRACE_NAME='62260353' and TEMPLATE_ID='166671_ABC7_000043051100_F11'&dopt=trace&size=1&seeas=Show	Lactobacillus	291	2e-141	NA18517	ABC	Human_NA18517	ABC7		2005-10-13	ZN	42719800	f11	WGA
		166791_ABC7_000043074300_C3	166791_ABC7_000043074300_C3	R	62528820	http://lgt.igs.umaryland.edu/traces/62528820_166791_ABC7_000043074300_C3.html	http://trace.ncbi.nlm.nih.gov/Traces/trace.cgi?&cmd=retrieve&val=TRACE_NAME='62528820' and TEMPLATE_ID='166791_ABC7_000043074300_C3'&dopt=trace&size=1&seeas=Show	Lactobacillus	148	9e-76	NA18517	ABC	Human_NA18517	ABC7		2005-10-18	ZV	42786500	c3	WGA
		166640_ABC7_000043040600_O2	166640_ABC7_000043040600_O2	R	62189540	http://lgt.igs.umaryland.edu/traces/62189540_166640_ABC7_000043040600_O2.html	http://trace.ncbi.nlm.nih.gov/Traces/trace.cgi?&cmd=retrieve&val=TRACE_NAME='62189540' and TEMPLATE_ID='166640_ABC7_000043040600_O2'&dopt=trace&size=1&seeas=Show	Lactobacillus	298	2e-148	NA18517	ABC	Human_NA18517	ABC7		2005-10-11	AB	42695600	o2	WGA
		166791_ABC7_000043069700_C20	166791_ABC7_000043069700_C20	R	62453892	http://lgt.igs.umaryland.edu/traces/62453892_166791_ABC7_000043069700_C20.html	http://trace.ncbi.nlm.nih.gov/Traces/trace.cgi?&cmd=retrieve&val=TRACE_NAME='62453892' and TEMPLATE_ID='166791_ABC7_000043069700_C20'&dopt=trace&size=1&seeas=Show	Lactobacillus	134	1e-67	NA18517	ABC	Human_NA18517	ABC7		2005-10-17	ZL	42700700	c20	WGA
		166671_ABC7_000043052100_N5	166671_ABC7_000043052100_N5	R	62269481	http://lgt.igs.umaryland.edu/traces/62269481_166671_ABC7_000043052100_N5.html	http://trace.ncbi.nlm.nih.gov/Traces/trace.cgi?&cmd=retrieve&val=TRACE_NAME='62269481' and TEMPLATE_ID='166671_ABC7_000043052100_N5'&dopt=trace&size=1&seeas=Show	Lactobacillus	193	1e-102	NA18517	ABC	Human_NA18517	ABC7		2005-10-14	ZX	42716800	n5	WGA
		166671_ABC7_000043056400_F8	166671_ABC7_000043056400_F8	F	62276433	http://lgt.igs.umaryland.edu/traces/62276433_166671_ABC7_000043056400_F8.html	http://trace.ncbi.nlm.nih.gov/Traces/trace.cgi?&cmd=retrieve&val=TRACE_NAME='62276433' and TEMPLATE_ID='166671_ABC7_000043056400_F8'&dopt=trace&size=1&seeas=Show	Lactobacillus	336	0	NA18517	ABC	Human_NA18517	ABC7		2005-10-13	AC	42723300	f8	WGA
		166476_ABC7_000000712740_D12	166476_ABC7_000000712740_D12	F	62282254	http://lgt.igs.umaryland.edu/traces/62282254_166476_ABC7_000000712740_D12.html	http://trace.ncbi.nlm.nih.gov/Traces/trace.cgi?&cmd=retrieve&val=TRACE_NAME='62282254' and TEMPLATE_ID='166476_ABC7_000000712740_D12'&dopt=trace&size=1&seeas=Show	Lactobacillus	305	2e-169	NA18517	ABC	Human_NA18517	ABC7		2005-10-13	ZA	713540	d12	WGA
		166791_ABC7_000043071800_J19	166791_ABC7_000043071800_J19	R	62528317	http://lgt.igs.umaryland.edu/traces/62528317_166791_ABC7_000043071800_J19.html	http://trace.ncbi.nlm.nih.gov/Traces/trace.cgi?&cmd=retrieve&val=TRACE_NAME='62528317' and TEMPLATE_ID='166791_ABC7_000043071800_J19'&dopt=trace&size=1&seeas=Show	Lactobacillus	171	2e-89	NA18517	ABC	Human_NA18517	ABC7		2005-10-18	AC	42788500	j19	WGA
		166752_ABC7_000043064000_E16	166752_ABC7_000043064000_E16	F	62324323	http://lgt.igs.umaryland.edu/traces/62324323_166752_ABC7_000043064000_E16.html	http://trace.ncbi.nlm.nih.gov/Traces/trace.cgi?&cmd=retrieve&val=TRACE_NAME='62324323' and TEMPLATE_ID='166752_ABC7_000043064000_E16'&dopt=trace&size=1&seeas=Show	Lactobacillus	590	0	NA18517	ABC	Human_NA18517	ABC7		2005-10-15	ZK	42730600	e16	WGA
		166377_ABC7_000000481222_D6	166377_ABC7_000000481222_D6	R	61915382	http://lgt.igs.umaryland.edu/traces/61915382_166377_ABC7_000000481222_D6.html	http://trace.ncbi.nlm.nih.gov/Traces/trace.cgi?&cmd=retrieve&val=TRACE_NAME='61915382' and TEMPLATE_ID='166377_ABC7_000000481222_D6'&dopt=trace&size=1&seeas=Show	Lactobacillus	106	1e-50	NA18517	ABC	Human_NA18517	ABC7		2005-10-07	ZG	518922	d6	WGA
		166791_ABC7_000043068500_M10	166791_ABC7_000043068500_M10	R	62458735	http://lgt.igs.umaryland.edu/traces/62458735_166791_ABC7_000043068500_M10.html	http://trace.ncbi.nlm.nih.gov/Traces/trace.cgi?&cmd=retrieve&val=TRACE_NAME='62458735' and TEMPLATE_ID='166791_ABC7_000043068500_M10'&dopt=trace&size=1&seeas=Show	Lactobacillus	308	2e-166	NA18517	ABC	Human_NA18517	ABC7		2005-10-18	AE	42701900	m10	WGA
		166671_ABC7_000043054100_I23	166671_ABC7_000043054100_I23	R	62251331	http://lgt.igs.umaryland.edu/traces/62251331_166671_ABC7_000043054100_I23.html	http://trace.ncbi.nlm.nih.gov/Traces/trace.cgi?&cmd=retrieve&val=TRACE_NAME='62251331' and TEMPLATE_ID='166671_ABC7_000043054100_I23'&dopt=trace&size=1&seeas=Show	Lactobacillus	179	8e-92	NA18517	ABC	Human_NA18517	ABC7		2005-10-13	ZS	42713400	i23	WGA
		166671_ABC7_000043047300_F1	166671_ABC7_000043047300_F1	F	62218661	http://lgt.igs.umaryland.edu/traces/62218661_166671_ABC7_000043047300_F1.html	http://trace.ncbi.nlm.nih.gov/Traces/trace.cgi?&cmd=retrieve&val=TRACE_NAME='62218661' and TEMPLATE_ID='166671_ABC7_000043047300_F1'&dopt=trace&size=1&seeas=Show	Lactobacillus	200	5e-102	NA18517	ABC	Human_NA18517	ABC7		2005-10-12	ZW	41988500	f1	WGA
		170143_ABC8_4_1_000041186600_B1	170143_ABC8_4_1_000041186600_B1	F	68706505	http://lgt.igs.umaryland.edu/traces/68706505_170143_ABC8_4_1_000041186600_B1.html	http://trace.ncbi.nlm.nih.gov/Traces/trace.cgi?&cmd=retrieve&val=TRACE_NAME='68706505' and TEMPLATE_ID='170143_ABC8_4_1_000041186600_B1'&dopt=trace&size=1&seeas=Show	Lactobacillus	235	5e-123	NA18507	ABC	Human_NA18507	ABC8_4_1		2006-01-25	ZK	44991000	b1	WGA
		170143_ABC8_4_1_000041198000_E11	170143_ABC8_4_1_000041198000_E11	F	69191480	http://lgt.igs.umaryland.edu/traces/69191480_170143_ABC8_4_1_000041198000_E11.html	http://trace.ncbi.nlm.nih.gov/Traces/trace.cgi?&cmd=retrieve&val=TRACE_NAME='69191480' and TEMPLATE_ID='170143_ABC8_4_1_000041198000_E11'&dopt=trace&size=1&seeas=Show	Lactobacillus	563	0	NA18507	ABC	Human_NA18507	ABC8_4_1		2006-01-30	ZY	45835400	e11	WGA
		168825_ABC8_4_1_000041108300_L4	168825_ABC8_4_1_000041108300_L4	R	67618162	http://lgt.igs.umaryland.edu/traces/67618162_168825_ABC8_4_1_000041108300_L4.html	http://trace.ncbi.nlm.nih.gov/Traces/trace.cgi?&cmd=retrieve&val=TRACE_NAME='67618162' and TEMPLATE_ID='168825_ABC8_4_1_000041108300_L4'&dopt=trace&size=1&seeas=Show	Lactobacillus	160	6e-83	NA18507	ABC	Human_NA18507	ABC8_4_1		2006-01-11	ZB	43726000	l4	WGA
		166791_ABC7_000043075500_K19	166791_ABC7_000043075500_K19	R	62569400	http://lgt.igs.umaryland.edu/traces/62569400_166791_ABC7_000043075500_K19.html	http://trace.ncbi.nlm.nih.gov/Traces/trace.cgi?&cmd=retrieve&val=TRACE_NAME='62569400' and TEMPLATE_ID='166791_ABC7_000043075500_K19'&dopt=trace&size=1&seeas=Show	Lactobacillus	246	3e-134	NA18517	ABC	Human_NA18517	ABC7		2005-10-19	ZC	42784000	k19	WGA
		166692_ABC7_000042052500_D21	166692_ABC7_000042052500_D21	R	62855490	http://lgt.igs.umaryland.edu/traces/62855490_166692_ABC7_000042052500_D21.html	http://trace.ncbi.nlm.nih.gov/Traces/trace.cgi?&cmd=retrieve&val=TRACE_NAME='62855490' and TEMPLATE_ID='166692_ABC7_000042052500_D21'&dopt=trace&size=1&seeas=Show	Lactobacillus	265	8e-141	NA18517	ABC	Human_NA18517	ABC7		2005-10-26	ZP	43113600	d21	WGA
		166692_ABC7_000042058000_I22	166692_ABC7_000042058000_I22	R	62870391	http://lgt.igs.umaryland.edu/traces/62870391_166692_ABC7_000042058000_I22.html	http://trace.ncbi.nlm.nih.gov/Traces/trace.cgi?&cmd=retrieve&val=TRACE_NAME='62870391' and TEMPLATE_ID='166692_ABC7_000042058000_I22'&dopt=trace&size=1&seeas=Show	Lactobacillus	214	7e-108	NA18517	ABC	Human_NA18517	ABC7		2005-10-26	ZR	43130100	i22	WGA
		166692_ABC7_000042059700_N2	166692_ABC7_000042059700_N2	F	62868925	http://lgt.igs.umaryland.edu/traces/62868925_166692_ABC7_000042059700_N2.html	http://trace.ncbi.nlm.nih.gov/Traces/trace.cgi?&cmd=retrieve&val=TRACE_NAME='62868925' and TEMPLATE_ID='166692_ABC7_000042059700_N2'&dopt=trace&size=1&seeas=Show	Lactobacillus	248	3e-128	NA18517	ABC	Human_NA18517	ABC7		2005-10-26	ZU	43131800	n2	WGA
		166692_ABC7_000043098800_M18	166692_ABC7_000043098800_M18	F	62775583	http://lgt.igs.umaryland.edu/traces/62775583_166692_ABC7_000043098800_M18.html	http://trace.ncbi.nlm.nih.gov/Traces/trace.cgi?&cmd=retrieve&val=TRACE_NAME='62775583' and TEMPLATE_ID='166692_ABC7_000043098800_M18'&dopt=trace&size=1&seeas=Show	Lactobacillus	293	8e-141	NA18517	ABC	Human_NA18517	ABC7		2005-10-24	ZE	43102900	m18	WGA
		166692_ABC7_000042756500_C10	166692_ABC7_000042756500_C10	F	62841044	http://lgt.igs.umaryland.edu/traces/62841044_166692_ABC7_000042756500_C10.html	http://trace.ncbi.nlm.nih.gov/Traces/trace.cgi?&cmd=retrieve&val=TRACE_NAME='62841044' and TEMPLATE_ID='166692_ABC7_000042756500_C10'&dopt=trace&size=1&seeas=Show	Lactobacillus	120	1e-44	NA18517	ABC	Human_NA18517	ABC7		2005-10-25	ZR	43123500	c10	WGA
		166540_ABC7_000000619322_L17	166540_ABC7_000000619322_L17	R	62124270	http://lgt.igs.umaryland.edu/traces/62124270_166540_ABC7_000000619322_L17.html	http://trace.ncbi.nlm.nih.gov/Traces/trace.cgi?&cmd=retrieve&val=TRACE_NAME='62124270' and TEMPLATE_ID='166540_ABC7_000000619322_L17'&dopt=trace&size=1&seeas=Show	Lactobacillus	157	4e-81	NA18517	ABC	Human_NA18517	ABC7		2005-10-10	ZB	571022	l17	WGA
		166692_ABC7_000042059400_I10	166692_ABC7_000042059400_I10	F	62852247	http://lgt.igs.umaryland.edu/traces/62852247_166692_ABC7_000042059400_I10.html	http://trace.ncbi.nlm.nih.gov/Traces/trace.cgi?&cmd=retrieve&val=TRACE_NAME='62852247' and TEMPLATE_ID='166692_ABC7_000042059400_I10'&dopt=trace&size=1&seeas=Show	Lactobacillus	237	2e-126	NA18517	ABC	Human_NA18517	ABC7		2005-10-26	ZW	43120400	i10	WGA
		166692_ABC7_000042052900_L14	166692_ABC7_000042052900_L14	F	62823454	http://lgt.igs.umaryland.edu/traces/62823454_166692_ABC7_000042052900_L14.html	http://trace.ncbi.nlm.nih.gov/Traces/trace.cgi?&cmd=retrieve&val=TRACE_NAME='62823454' and TEMPLATE_ID='166692_ABC7_000042052900_L14'&dopt=trace&size=1&seeas=Show	Lactobacillus	123	8e-61	NA18517	ABC	Human_NA18517	ABC7		2005-10-25	ZU	43123400	l14	WGA
		166941_ABC7_000043086000_F15	166941_ABC7_000043086000_F15	F	62694173	http://lgt.igs.umaryland.edu/traces/62694173_166941_ABC7_000043086000_F15.html	http://trace.ncbi.nlm.nih.gov/Traces/trace.cgi?&cmd=retrieve&val=TRACE_NAME='62694173' and TEMPLATE_ID='166941_ABC7_000043086000_F15'&dopt=trace&size=1&seeas=Show	Lactobacillus	149	2e-76	NA18517	ABC	Human_NA18517	ABC7		2005-10-21	AE	42791200	f15	WGA
		166941_ABC7_000043085300_O16	166941_ABC7_000043085300_O16	R	62682292	http://lgt.igs.umaryland.edu/traces/62682292_166941_ABC7_000043085300_O16.html	http://trace.ncbi.nlm.nih.gov/Traces/trace.cgi?&cmd=retrieve&val=TRACE_NAME='62682292' and TEMPLATE_ID='166941_ABC7_000043085300_O16'&dopt=trace&size=1&seeas=Show	Lactobacillus	310	3e-165	NA18517	ABC	Human_NA18517	ABC7		2005-10-22	ZV	42019100	o16	WGA
		166941_ABC7_000043086600_E4	166941_ABC7_000043086600_E4	R	62706883	http://lgt.igs.umaryland.edu/traces/62706883_166941_ABC7_000043086600_E4.html	http://trace.ncbi.nlm.nih.gov/Traces/trace.cgi?&cmd=retrieve&val=TRACE_NAME='62706883' and TEMPLATE_ID='166941_ABC7_000043086600_E4'&dopt=trace&size=1&seeas=Show	Lactobacillus	176	5e-90	NA18517	ABC	Human_NA18517	ABC7		2005-10-22	ZY	42046600	e4	WGA
		166692_ABC7_000042055000_L18	166692_ABC7_000042055000_L18	R	62876090	http://lgt.igs.umaryland.edu/traces/62876090_166692_ABC7_000042055000_L18.html	http://trace.ncbi.nlm.nih.gov/Traces/trace.cgi?&cmd=retrieve&val=TRACE_NAME='62876090' and TEMPLATE_ID='166692_ABC7_000042055000_L18'&dopt=trace&size=1&seeas=Show	Lactobacillus	222	4e-115	NA18517	ABC	Human_NA18517	ABC7		2005-10-26	ZJ	43113400	l18	WGA
		166863_ABC7_000042751700_A12	166863_ABC7_000042751700_A12	F	62623143	http://lgt.igs.umaryland.edu/traces/62623143_166863_ABC7_000042751700_A12.html	http://trace.ncbi.nlm.nih.gov/Traces/trace.cgi?&cmd=retrieve&val=TRACE_NAME='62623143' and TEMPLATE_ID='166863_ABC7_000042751700_A12'&dopt=trace&size=1&seeas=Show	Lactobacillus	161	8e-79	NA18517	ABC	Human_NA18517	ABC7		2005-10-20	ZW	42016000	a12	WGA
		166863_ABC7_000043079000_L15	166863_ABC7_000043079000_L15	R	62592570	http://lgt.igs.umaryland.edu/traces/62592570_166863_ABC7_000043079000_L15.html	http://trace.ncbi.nlm.nih.gov/Traces/trace.cgi?&cmd=retrieve&val=TRACE_NAME='62592570' and TEMPLATE_ID='166863_ABC7_000043079000_L15'&dopt=trace&size=1&seeas=Show	Lactobacillus	248	2e-135	NA18517	ABC	Human_NA18517	ABC7		2005-10-19	ZB	42000900	l15	WGA
		166863_ABC7_000043077500_P5	166863_ABC7_000043077500_P5	F	62588060	http://lgt.igs.umaryland.edu/traces/62588060_166863_ABC7_000043077500_P5.html	http://trace.ncbi.nlm.nih.gov/Traces/trace.cgi?&cmd=retrieve&val=TRACE_NAME='62588060' and TEMPLATE_ID='166863_ABC7_000043077500_P5'&dopt=trace&size=1&seeas=Show	Lactobacillus	119	2e-58	NA18517	ABC	Human_NA18517	ABC7		2005-10-19	AA	41997500	p5	WGA
		166692_ABC7_000042061700_C19	166692_ABC7_000042061700_C19	R	62852000	http://lgt.igs.umaryland.edu/traces/62852000_166692_ABC7_000042061700_C19.html	http://trace.ncbi.nlm.nih.gov/Traces/trace.cgi?&cmd=retrieve&val=TRACE_NAME='62852000' and TEMPLATE_ID='166692_ABC7_000042061700_C19'&dopt=trace&size=1&seeas=Show	Lactobacillus	106	1e-50	NA18517	ABC	Human_NA18517	ABC7		2005-10-26	ZY	43129500	c19	WGA
		166941_ABC7_000043085600_H13	166941_ABC7_000043085600_H13	R	62665394	http://lgt.igs.umaryland.edu/traces/62665394_166941_ABC7_000043085600_H13.html	http://trace.ncbi.nlm.nih.gov/Traces/trace.cgi?&cmd=retrieve&val=TRACE_NAME='62665394' and TEMPLATE_ID='166941_ABC7_000043085600_H13'&dopt=trace&size=1&seeas=Show	Lactobacillus	380	0	NA18517	ABC	Human_NA18517	ABC7		2005-10-21	ZS	42790900	h13	WGA
		166941_ABC7_000043090600_F12	166941_ABC7_000043090600_F12	F	62728133	http://lgt.igs.umaryland.edu/traces/62728133_166941_ABC7_000043090600_F12.html	http://trace.ncbi.nlm.nih.gov/Traces/trace.cgi?&cmd=retrieve&val=TRACE_NAME='62728133' and TEMPLATE_ID='166941_ABC7_000043090600_F12'&dopt=trace&size=1&seeas=Show	Lactobacillus	230	2e-117	NA18517	ABC	Human_NA18517	ABC7		2005-10-22	ZE	42039300	f12	WGA
	Lactococcus
		167098_ABC8_000042165000_M3	167098_ABC8_000042165000_M3	R	65289971	http://lgt.igs.umaryland.edu/traces/65289971_167098_ABC8_000042165000_M3.html	http://trace.ncbi.nlm.nih.gov/Traces/trace.cgi?&cmd=retrieve&val=TRACE_NAME='65289971' and TEMPLATE_ID='167098_ABC8_000042165000_M3'&dopt=trace&size=1&seeas=Show	Lactococcus	141	8e-67	NA18507	ABC	Human_NA18507	ABC8		2005-12-07	ZL	44834900	m3	WGA
		322f3_h1c02f3		F	322f3_h1c02f3.r1	http://lgt.igs.umaryland.edu/traces/322f3_h1c02f3.r1_322f3_h1c02f3.html	http://trace.ncbi.nlm.nih.gov/Traces/trace.cgi?&cmd=retrieve&val=TRACE_NAME='322f3_h1c02f3.r1' and TEMPLATE_ID='322f3_h1c02f3'&dopt=trace&size=1&seeas=Show	Lactococcus	118	9e-59		UOKNOR	322f3
	Laribacter
		164897_ABC7_000040642700_E12	ABC7_000040642700_E12	F	57854941	http://lgt.igs.umaryland.edu/traces/57854941_164897_ABC7_000040642700_E12.html	http://trace.ncbi.nlm.nih.gov/Traces/trace.cgi?&cmd=retrieve&val=TRACE_NAME='57854941' and TEMPLATE_ID='164897_ABC7_000040642700_E12'&dopt=trace&size=1&seeas=Show	Laribacter	293	3e-100	NA18517	ABC	Human_NA18517	ABC7		2005-08-19	ZU	40125800	e12	WGA
	Leptothrix
		174779_ABC12_000046921000_O19	174779_ABC12_000046921000_O19	F	84336416	http://lgt.igs.umaryland.edu/traces/84336416_174779_ABC12_000046921000_O19.html	http://trace.ncbi.nlm.nih.gov/Traces/trace.cgi?&cmd=retrieve&val=TRACE_NAME='84336416' and TEMPLATE_ID='174779_ABC12_000046921000_O19'&dopt=trace&size=1&seeas=Show	Leptothrix	288	2e-80	NA12878	ABC	Human_NA12878	ABC12		2006-06-19	AE	46939800	o19	WGA
	Methylibium
		167098_ABC8_000041037100_J19	167098_ABC8_000041037100_J19	F	66126335	http://lgt.igs.umaryland.edu/traces/66126335_167098_ABC8_000041037100_J19.html	http://trace.ncbi.nlm.nih.gov/Traces/trace.cgi?&cmd=retrieve&val=TRACE_NAME='66126335' and TEMPLATE_ID='167098_ABC8_000041037100_J19'&dopt=trace&size=1&seeas=Show	Methylibium	138	6e-65	NA18507	ABC	Human_NA18507	ABC8		2005-12-17	AB	45574500	j19	WGA
		ABC8_000043034700_B17	ABC8_000043034700_B17	F	61715773	http://lgt.igs.umaryland.edu/traces/61715773_ABC8_000043034700_B17.html	http://trace.ncbi.nlm.nih.gov/Traces/trace.cgi?&cmd=retrieve&val=TRACE_NAME='61715773' and TEMPLATE_ID='ABC8_000043034700_B17'&dopt=trace&size=1&seeas=Show	Methylibium	130	5e-34	NA18507	ABC	Human_NA18507	ABC8		2005-10-03	ZE	41944400	b17	WGA
		165972_ABC8_000042996600_H1	165972_ABC8_000042996600_H1	F	61362024	http://lgt.igs.umaryland.edu/traces/61362024_165972_ABC8_000042996600_H1.html	http://trace.ncbi.nlm.nih.gov/Traces/trace.cgi?&cmd=retrieve&val=TRACE_NAME='61362024' and TEMPLATE_ID='165972_ABC8_000042996600_H1'&dopt=trace&size=1&seeas=Show	Methylibium	144	2e-37	NA18507	ABC	Human_NA18507	ABC8		2005-09-28	ZU	42565000	h1	WGA
		170215_ABC9_3_2_000045236700_F19	170215_ABC9_3_2_000045236700_F19	F	72075249	http://lgt.igs.umaryland.edu/traces/72075249_170215_ABC9_3_2_000045236700_F19.html	http://trace.ncbi.nlm.nih.gov/Traces/trace.cgi?&cmd=retrieve&val=TRACE_NAME='72075249' and TEMPLATE_ID='170215_ABC9_3_2_000045236700_F19'&dopt=trace&size=1&seeas=Show	Methylibium	272	1e-149	NA18956	ABC	Human_NA18956	ABC9_3_2		2006-02-28	ZS	46026600	f19	WGA
		165431_ABC7_000042414400_L2	165431_ABC7_000042414400_L2	F	59002388	http://lgt.igs.umaryland.edu/traces/59002388_165431_ABC7_000042414400_L2.html	http://trace.ncbi.nlm.nih.gov/Traces/trace.cgi?&cmd=retrieve&val=TRACE_NAME='59002388' and TEMPLATE_ID='165431_ABC7_000042414400_L2'&dopt=trace&size=1&seeas=Show	Methylibium	228	1e-68	NA18517	ABC	Human_NA18517	ABC7		2005-09-06	ZA	41870100	l2	WGA
	Methylobacillus
		165972_ABC8_000042546500_D5	165972_ABC8_000042546500_D5	R	61356708	http://lgt.igs.umaryland.edu/traces/61356708_165972_ABC8_000042546500_D5.html	http://trace.ncbi.nlm.nih.gov/Traces/trace.cgi?&cmd=retrieve&val=TRACE_NAME='61356708' and TEMPLATE_ID='165972_ABC8_000042546500_D5'&dopt=trace&size=1&seeas=Show	Methylobacillus	368	9e-107	NA18507	ABC	Human_NA18507	ABC8		2005-09-28	ZF	42563500	d5	WGA
	Methylobacterium
		167000_ABC8_000002117840_J16	167000_ABC8_000002117840_J16	F	64093393	http://lgt.igs.umaryland.edu/traces/64093393_167000_ABC8_000002117840_J16.html	http://trace.ncbi.nlm.nih.gov/Traces/trace.cgi?&cmd=retrieve&val=TRACE_NAME='64093393' and TEMPLATE_ID='167000_ABC8_000002117840_J16'&dopt=trace&size=1&seeas=Show	Methylobacterium	105	1e-40	NA18507	ABC	Human_NA18507	ABC8		2005-11-18	ZE	778840	j16	WGA
		167098_ABC8_000040862500_L8	167098_ABC8_000040862500_L8	F	64751338	http://lgt.igs.umaryland.edu/traces/64751338_167098_ABC8_000040862500_L8.html	http://trace.ncbi.nlm.nih.gov/Traces/trace.cgi?&cmd=retrieve&val=TRACE_NAME='64751338' and TEMPLATE_ID='167098_ABC8_000040862500_L8'&dopt=trace&size=1&seeas=Show	Methylobacterium	191	4e-75	NA18507	ABC	Human_NA18507	ABC8		2005-11-28	ZC	42211100	l8	WGA
		167098_ABC8_000040905500_L17	167098_ABC8_000040905500_L17	F	65167650	http://lgt.igs.umaryland.edu/traces/65167650_167098_ABC8_000040905500_L17.html	http://trace.ncbi.nlm.nih.gov/Traces/trace.cgi?&cmd=retrieve&val=TRACE_NAME='65167650' and TEMPLATE_ID='167098_ABC8_000040905500_L17'&dopt=trace&size=1&seeas=Show	Methylobacterium	105	3e-45	NA18507	ABC	Human_NA18507	ABC8		2005-12-05	ZG	40918700	l17	WGA
		tnv54h11		F	tnv54h11.b1	http://lgt.igs.umaryland.edu/traces/tnv54h11.b1_tnv54h11.html	http://trace.ncbi.nlm.nih.gov/Traces/trace.cgi?&cmd=retrieve&val=TRACE_NAME='tnv54h11.b1' and TEMPLATE_ID='tnv54h11'&dopt=trace&size=1&seeas=Show	Methylobacterium	469	3e-141		WUGSC	H_AJCHROM2	722058484		2003-08-13	806	tnv54	h11	WCS
	Polymorphum
		165433_ABC7_000042464500_N22	165433_ABC7_000042464500_N22	F	59331752	http://lgt.igs.umaryland.edu/traces/59331752_165433_ABC7_000042464500_N22.html	http://trace.ncbi.nlm.nih.gov/Traces/trace.cgi?&cmd=retrieve&val=TRACE_NAME='59331752' and TEMPLATE_ID='165433_ABC7_000042464500_N22'&dopt=trace&size=1&seeas=Show	Polymorphum	167	2e-46	NA18517	ABC	Human_NA18517	ABC7		2005-09-11	ZD	40798600	n22	WGA
	Propionibacterium
		HEWWP2793	YRM2019	R	80386237	http://lgt.igs.umaryland.edu/traces/80386237_HEWWP2793.html	http://trace.ncbi.nlm.nih.gov/Traces/trace.cgi?&cmd=retrieve&val=TRACE_NAME='80386237' and TEMPLATE_ID='HEWWP2793'&dopt=trace&size=1&seeas=Show	Propionibacterium	459	0		BCM	HEWW	HEWWP	1048218	2004-03-30	pru	HEWWP1E2700
		171515_ABC9_3_5_000043943900_I21	171515_ABC9_3_5_000043943900_I21	R	73034279	http://lgt.igs.umaryland.edu/traces/73034279_171515_ABC9_3_5_000043943900_I21.html	http://trace.ncbi.nlm.nih.gov/Traces/trace.cgi?&cmd=retrieve&val=TRACE_NAME='73034279' and TEMPLATE_ID='171515_ABC9_3_5_000043943900_I21'&dopt=trace&size=1&seeas=Show	Propionibacterium	124	2e-61	NA18956	ABC	Human_NA18956	ABC9_3_5		2006-03-08	AC	46199400	i21	WGA
		171515_ABC9_3_5_000043943900_L12	171515_ABC9_3_5_000043943900_L12	R	73034606	http://lgt.igs.umaryland.edu/traces/73034606_171515_ABC9_3_5_000043943900_L12.html	http://trace.ncbi.nlm.nih.gov/Traces/trace.cgi?&cmd=retrieve&val=TRACE_NAME='73034606' and TEMPLATE_ID='171515_ABC9_3_5_000043943900_L12'&dopt=trace&size=1&seeas=Show	Propionibacterium	103	6e-49	NA18956	ABC	Human_NA18956	ABC9_3_5		2006-03-08	AC	46199400	l12	WGA
		172343_ABC9_3_5_000043978200_F12	172343_ABC9_3_5_000043978200_F12	R	74180897	http://lgt.igs.umaryland.edu/traces/74180897_172343_ABC9_3_5_000043978200_F12.html	http://trace.ncbi.nlm.nih.gov/Traces/trace.cgi?&cmd=retrieve&val=TRACE_NAME='74180897' and TEMPLATE_ID='172343_ABC9_3_5_000043978200_F12'&dopt=trace&size=1&seeas=Show	Propionibacterium	129	4e-38	NA18956	ABC	Human_NA18956	ABC9_3_5		2006-03-18	AA	45323300	f12	WGA
		166910_ABC8_000043207200_H18	166910_ABC8_000043207200_H18	R	63304666	http://lgt.igs.umaryland.edu/traces/63304666_166910_ABC8_000043207200_H18.html	http://trace.ncbi.nlm.nih.gov/Traces/trace.cgi?&cmd=retrieve&val=TRACE_NAME='63304666' and TEMPLATE_ID='166910_ABC8_000043207200_H18'&dopt=trace&size=1&seeas=Show	Propionibacterium	159	2e-82	NA18507	ABC	Human_NA18507	ABC8		2005-11-05	ZW	43229300	h18	WGA
		167000_ABC8_000000737740_E19	167000_ABC8_000000737740_E19	R	63954635	http://lgt.igs.umaryland.edu/traces/63954635_167000_ABC8_000000737740_E19.html	http://trace.ncbi.nlm.nih.gov/Traces/trace.cgi?&cmd=retrieve&val=TRACE_NAME='63954635' and TEMPLATE_ID='167000_ABC8_000000737740_E19'&dopt=trace&size=1&seeas=Show	Propionibacterium	161	4e-81	NA18507	ABC	Human_NA18507	ABC8		2005-11-15	ZK	2681540	e19	WGA
		167000_ABC8_000002121340_F18	167000_ABC8_000002121340_F18	R	64067179	http://lgt.igs.umaryland.edu/traces/64067179_167000_ABC8_000002121340_F18.html	http://trace.ncbi.nlm.nih.gov/Traces/trace.cgi?&cmd=retrieve&val=TRACE_NAME='64067179' and TEMPLATE_ID='167000_ABC8_000002121340_F18'&dopt=trace&size=1&seeas=Show	Propionibacterium	186	4e-84	NA18507	ABC	Human_NA18507	ABC8		2005-11-18	ZQ	764040	f18	WGA
		167000_ABC8_000002138040_D24	167000_ABC8_000002138040_D24	F	64261566	http://lgt.igs.umaryland.edu/traces/64261566_167000_ABC8_000002138040_D24.html	http://trace.ncbi.nlm.nih.gov/Traces/trace.cgi?&cmd=retrieve&val=TRACE_NAME='64261566' and TEMPLATE_ID='167000_ABC8_000002138040_D24'&dopt=trace&size=1&seeas=Show	Propionibacterium	109	2e-40	NA18507	ABC	Human_NA18507	ABC8		2005-11-21	ZS	832840	d24	WGA
		166910_ABC8_000043255800_C18	166910_ABC8_000043255800_C18	F	63581398	http://lgt.igs.umaryland.edu/traces/63581398_166910_ABC8_000043255800_C18.html	http://trace.ncbi.nlm.nih.gov/Traces/trace.cgi?&cmd=retrieve&val=TRACE_NAME='63581398' and TEMPLATE_ID='166910_ABC8_000043255800_C18'&dopt=trace&size=1&seeas=Show	Propionibacterium	114	2e-55	NA18507	ABC	Human_NA18507	ABC8		2005-11-10	ZI	43293900	c18	WGA
		167000_ABC8_000002148140_O19	167000_ABC8_000002148140_O19	R	64305284	http://lgt.igs.umaryland.edu/traces/64305284_167000_ABC8_000002148140_O19.html	http://trace.ncbi.nlm.nih.gov/Traces/trace.cgi?&cmd=retrieve&val=TRACE_NAME='64305284' and TEMPLATE_ID='167000_ABC8_000002148140_O19'&dopt=trace&size=1&seeas=Show	Propionibacterium	138	3e-60	NA18507	ABC	Human_NA18507	ABC8		2005-11-22	ZW	845340	o19	WGA
		167000_ABC8_000000718840_H9	167000_ABC8_000000718840_H9	R	63823570	http://lgt.igs.umaryland.edu/traces/63823570_167000_ABC8_000000718840_H9.html	http://trace.ncbi.nlm.nih.gov/Traces/trace.cgi?&cmd=retrieve&val=TRACE_NAME='63823570' and TEMPLATE_ID='167000_ABC8_000000718840_H9'&dopt=trace&size=1&seeas=Show	Propionibacterium	127	2e-58	NA18507	ABC	Human_NA18507	ABC8		2005-11-14	ZP	2656040	h9	WGA
		166910_ABC8_000043251600_K8	166910_ABC8_000043251600_K8	F	63542168	http://lgt.igs.umaryland.edu/traces/63542168_166910_ABC8_000043251600_K8.html	http://trace.ncbi.nlm.nih.gov/Traces/trace.cgi?&cmd=retrieve&val=TRACE_NAME='63542168' and TEMPLATE_ID='166910_ABC8_000043251600_K8'&dopt=trace&size=1&seeas=Show	Propionibacterium	352	0	NA18507	ABC	Human_NA18507	ABC8		2005-11-09	ZL	43295200	k8	WGA
		166910_ABC8_000043201700_G20	166910_ABC8_000043201700_G20	R	63332213	http://lgt.igs.umaryland.edu/traces/63332213_166910_ABC8_000043201700_G20.html	http://trace.ncbi.nlm.nih.gov/Traces/trace.cgi?&cmd=retrieve&val=TRACE_NAME='63332213' and TEMPLATE_ID='166910_ABC8_000043201700_G20'&dopt=trace&size=1&seeas=Show	Propionibacterium	166	1e-74	NA18507	ABC	Human_NA18507	ABC8		2005-11-06	ZF	43228100	g20	WGA
		166910_ABC8_000042106600_I11	166910_ABC8_000042106600_I11	R	63255311	http://lgt.igs.umaryland.edu/traces/63255311_166910_ABC8_000042106600_I11.html	http://trace.ncbi.nlm.nih.gov/Traces/trace.cgi?&cmd=retrieve&val=TRACE_NAME='63255311' and TEMPLATE_ID='166910_ABC8_000042106600_I11'&dopt=trace&size=1&seeas=Show	Propionibacterium	140	3e-66	NA18507	ABC	Human_NA18507	ABC8		2005-11-04	ZU	43225000	i11	WGA
		167000_ABC8_000002122840_D13	167000_ABC8_000002122840_D13	F	64079058	http://lgt.igs.umaryland.edu/traces/64079058_167000_ABC8_000002122840_D13.html	http://trace.ncbi.nlm.nih.gov/Traces/trace.cgi?&cmd=retrieve&val=TRACE_NAME='64079058' and TEMPLATE_ID='167000_ABC8_000002122840_D13'&dopt=trace&size=1&seeas=Show	Propionibacterium	154	5e-77	NA18507	ABC	Human_NA18507	ABC8		2005-11-18	AB	772840	d13	WGA
		166910_ABC8_000043253700_G24	166910_ABC8_000043253700_G24	R	63566184	http://lgt.igs.umaryland.edu/traces/63566184_166910_ABC8_000043253700_G24.html	http://trace.ncbi.nlm.nih.gov/Traces/trace.cgi?&cmd=retrieve&val=TRACE_NAME='63566184' and TEMPLATE_ID='166910_ABC8_000043253700_G24'&dopt=trace&size=1&seeas=Show	Propionibacterium	341	0	NA18507	ABC	Human_NA18507	ABC8		2005-11-09	ZS	43296500	g24	WGA
		166910_ABC8_000043241000_J15	166910_ABC8_000043241000_J15	R	63443621	http://lgt.igs.umaryland.edu/traces/63443621_166910_ABC8_000043241000_J15.html	http://trace.ncbi.nlm.nih.gov/Traces/trace.cgi?&cmd=retrieve&val=TRACE_NAME='63443621' and TEMPLATE_ID='166910_ABC8_000043241000_J15'&dopt=trace&size=1&seeas=Show	Propionibacterium	187	6e-74	NA18507	ABC	Human_NA18507	ABC8		2005-11-07	ZC	43278600	j15	WGA
		167000_ABC8_000002617740_J9	167000_ABC8_000002617740_J9	F	63663701	http://lgt.igs.umaryland.edu/traces/63663701_167000_ABC8_000002617740_J9.html	http://trace.ncbi.nlm.nih.gov/Traces/trace.cgi?&cmd=retrieve&val=TRACE_NAME='63663701' and TEMPLATE_ID='167000_ABC8_000002617740_J9'&dopt=trace&size=1&seeas=Show	Propionibacterium	146	1e-74	NA18507	ABC	Human_NA18507	ABC8		2005-11-11	ZC	2640940	j9	WGA
		167098_ABC8_000000649222_P18	167098_ABC8_000000649222_P18	R	64452494	http://lgt.igs.umaryland.edu/traces/64452494_167098_ABC8_000000649222_P18.html	http://trace.ncbi.nlm.nih.gov/Traces/trace.cgi?&cmd=retrieve&val=TRACE_NAME='64452494' and TEMPLATE_ID='167098_ABC8_000000649222_P18'&dopt=trace&size=1&seeas=Show	Propionibacterium	124	2e-61	NA18507	ABC	Human_NA18507	ABC8		2005-11-23	AA	672622	p18	WGA
		166910_ABC8_000042091200_J10	166910_ABC8_000042091200_J10	F	63188297	http://lgt.igs.umaryland.edu/traces/63188297_166910_ABC8_000042091200_J10.html	http://trace.ncbi.nlm.nih.gov/Traces/trace.cgi?&cmd=retrieve&val=TRACE_NAME='63188297' and TEMPLATE_ID='166910_ABC8_000042091200_J10'&dopt=trace&size=1&seeas=Show	Propionibacterium	157	3e-76	NA18507	ABC	Human_NA18507	ABC8		2005-11-03	ZT	43200900	j10	WGA
		167000_ABC8_000000730040_D7	167000_ABC8_000000730040_D7	R	63806830	http://lgt.igs.umaryland.edu/traces/63806830_167000_ABC8_000000730040_D7.html	http://trace.ncbi.nlm.nih.gov/Traces/trace.cgi?&cmd=retrieve&val=TRACE_NAME='63806830' and TEMPLATE_ID='167000_ABC8_000000730040_D7'&dopt=trace&size=1&seeas=Show	Propionibacterium	222	2e-110	NA18507	ABC	Human_NA18507	ABC8		2005-11-14	ZG	2660740	d7	WGA
		167000_ABC8_000002146940_C9	167000_ABC8_000002146940_C9	R	64419851	http://lgt.igs.umaryland.edu/traces/64419851_167000_ABC8_000002146940_C9.html	http://trace.ncbi.nlm.nih.gov/Traces/trace.cgi?&cmd=retrieve&val=TRACE_NAME='64419851' and TEMPLATE_ID='167000_ABC8_000002146940_C9'&dopt=trace&size=1&seeas=Show	Propionibacterium	342	0	NA18507	ABC	Human_NA18507	ABC8		2005-11-22	ZY	847140	c9	WGA
		166910_ABC8_000042095900_H2	166910_ABC8_000042095900_H2	F	63188934	http://lgt.igs.umaryland.edu/traces/63188934_166910_ABC8_000042095900_H2.html	http://trace.ncbi.nlm.nih.gov/Traces/trace.cgi?&cmd=retrieve&val=TRACE_NAME='63188934' and TEMPLATE_ID='166910_ABC8_000042095900_H2'&dopt=trace&size=1&seeas=Show	Propionibacterium	261	3e-143	NA18507	ABC	Human_NA18507	ABC8		2005-11-03	ZU	43194400	h2	WGA
		166910_ABC8_000042082300_K1	166910_ABC8_000042082300_K1	F	63112195	http://lgt.igs.umaryland.edu/traces/63112195_166910_ABC8_000042082300_K1.html	http://trace.ncbi.nlm.nih.gov/Traces/trace.cgi?&cmd=retrieve&val=TRACE_NAME='63112195' and TEMPLATE_ID='166910_ABC8_000042082300_K1'&dopt=trace&size=1&seeas=Show	Propionibacterium	157	1e-78	NA18507	ABC	Human_NA18507	ABC8		2005-11-01	ZR	43174200	k1	WGA
		167000_ABC8_000000723940_G7	167000_ABC8_000000723940_G7	R	63880632	http://lgt.igs.umaryland.edu/traces/63880632_167000_ABC8_000000723940_G7.html	http://trace.ncbi.nlm.nih.gov/Traces/trace.cgi?&cmd=retrieve&val=TRACE_NAME='63880632' and TEMPLATE_ID='167000_ABC8_000000723940_G7'&dopt=trace&size=1&seeas=Show	Propionibacterium	329	0	NA18507	ABC	Human_NA18507	ABC8		2005-11-15	AD	2668940	g7	WGA
		167000_ABC8_000002124340_J19	167000_ABC8_000002124340_J19	R	64141161	http://lgt.igs.umaryland.edu/traces/64141161_167000_ABC8_000002124340_J19.html	http://trace.ncbi.nlm.nih.gov/Traces/trace.cgi?&cmd=retrieve&val=TRACE_NAME='64141161' and TEMPLATE_ID='167000_ABC8_000002124340_J19'&dopt=trace&size=1&seeas=Show	Propionibacterium	162	2e-79	NA18507	ABC	Human_NA18507	ABC8		2005-11-19	ZC	789740	j19	WGA
		174779_ABC12_000047011200_F9	174779_ABC12_000047011200_F9	R	86260593	http://lgt.igs.umaryland.edu/traces/86260593_174779_ABC12_000047011200_F9.html	http://trace.ncbi.nlm.nih.gov/Traces/trace.cgi?&cmd=retrieve&val=TRACE_NAME='86260593' and TEMPLATE_ID='174779_ABC12_000047011200_F9'&dopt=trace&size=1&seeas=Show	Propionibacterium	304	8e-169	NA12878	ABC	Human_NA12878	ABC12		2006-07-10	ZL	46463000	f9	WGA
		174779_ABC12_000046967700_L18	174779_ABC12_000046967700_L18	R	85791694	http://lgt.igs.umaryland.edu/traces/85791694_174779_ABC12_000046967700_L18.html	http://trace.ncbi.nlm.nih.gov/Traces/trace.cgi?&cmd=retrieve&val=TRACE_NAME='85791694' and TEMPLATE_ID='174779_ABC12_000046967700_L18'&dopt=trace&size=1&seeas=Show	Propionibacterium	286	4e-158	NA12878	ABC	Human_NA12878	ABC12		2006-07-03	AK	48466841	l18	WGA
		166475_ABC7_000000547122_M7	166475_ABC7_000000547122_M7	F	62071579	http://lgt.igs.umaryland.edu/traces/62071579_166475_ABC7_000000547122_M7.html	http://trace.ncbi.nlm.nih.gov/Traces/trace.cgi?&cmd=retrieve&val=TRACE_NAME='62071579' and TEMPLATE_ID='166475_ABC7_000000547122_M7'&dopt=trace&size=1&seeas=Show	Propionibacterium	218	1e-112	NA18517	ABC	Human_NA18517	ABC7		2005-10-09	AD	565922	m7	WGA
		165728_ABC7_000042503500_I14	165728_ABC7_000042503500_I14	R	60275149	http://lgt.igs.umaryland.edu/traces/60275149_165728_ABC7_000042503500_I14.html	http://trace.ncbi.nlm.nih.gov/Traces/trace.cgi?&cmd=retrieve&val=TRACE_NAME='60275149' and TEMPLATE_ID='165728_ABC7_000042503500_I14'&dopt=trace&size=1&seeas=Show	Propionibacterium	142	3e-72	NA18517	ABC	Human_NA18517	ABC7		2005-09-21	ZH	41908000	i14	WGA
		165654_ABC7_000040273200_H23	165654_ABC7_000040273200_H23	R	59820008	http://lgt.igs.umaryland.edu/traces/59820008_165654_ABC7_000040273200_H23.html	http://trace.ncbi.nlm.nih.gov/Traces/trace.cgi?&cmd=retrieve&val=TRACE_NAME='59820008' and TEMPLATE_ID='165654_ABC7_000040273200_H23'&dopt=trace&size=1&seeas=Show	Propionibacterium	149	3e-76	NA18517	ABC	Human_NA18517	ABC7		2005-09-15	AA	42931800	h23	WGA
		167098_ABC8_000040857800_K12	167098_ABC8_000040857800_K12	R	64940924	http://lgt.igs.umaryland.edu/traces/64940924_167098_ABC8_000040857800_K12.html	http://trace.ncbi.nlm.nih.gov/Traces/trace.cgi?&cmd=retrieve&val=TRACE_NAME='64940924' and TEMPLATE_ID='167098_ABC8_000040857800_K12'&dopt=trace&size=1&seeas=Show	Propionibacterium	192	7e-95	NA18507	ABC	Human_NA18507	ABC8		2005-12-01	AG	42259500	k12	WGA
		167098_ABC8_000041787400_M13	167098_ABC8_000041787400_M13	F	64686179	http://lgt.igs.umaryland.edu/traces/64686179_167098_ABC8_000041787400_M13.html	http://trace.ncbi.nlm.nih.gov/Traces/trace.cgi?&cmd=retrieve&val=TRACE_NAME='64686179' and TEMPLATE_ID='167098_ABC8_000041787400_M13'&dopt=trace&size=1&seeas=Show	Propionibacterium	249	8e-110	NA18507	ABC	Human_NA18507	ABC8		2005-11-27	ZG	42179500	m13	WGA
		167098_ABC8_000040911400_H1	167098_ABC8_000040911400_H1	R	65251534	http://lgt.igs.umaryland.edu/traces/65251534_167098_ABC8_000040911400_H1.html	http://trace.ncbi.nlm.nih.gov/Traces/trace.cgi?&cmd=retrieve&val=TRACE_NAME='65251534' and TEMPLATE_ID='167098_ABC8_000040911400_H1'&dopt=trace&size=1&seeas=Show	Propionibacterium	172	3e-85	NA18507	ABC	Human_NA18507	ABC8		2005-12-06	ZA	40928700	h1	WGA
		167098_ABC8_000041026900_G22	167098_ABC8_000041026900_G22	R	65954864	http://lgt.igs.umaryland.edu/traces/65954864_167098_ABC8_000041026900_G22.html	http://trace.ncbi.nlm.nih.gov/Traces/trace.cgi?&cmd=retrieve&val=TRACE_NAME='65954864' and TEMPLATE_ID='167098_ABC8_000041026900_G22'&dopt=trace&size=1&seeas=Show	Propionibacterium	149	1e-71	NA18507	ABC	Human_NA18507	ABC8		2005-12-15	ZG	45559600	g22	WGA
		167098_ABC8_000040977900_F24	167098_ABC8_000040977900_F24	F	65595993	http://lgt.igs.umaryland.edu/traces/65595993_167098_ABC8_000040977900_F24.html	http://trace.ncbi.nlm.nih.gov/Traces/trace.cgi?&cmd=retrieve&val=TRACE_NAME='65595993' and TEMPLATE_ID='167098_ABC8_000040977900_F24'&dopt=trace&size=1&seeas=Show	Propionibacterium	186	2e-98	NA18507	ABC	Human_NA18507	ABC8		2005-12-11	ZE	43679100	f24	WGA
		167098_ABC8_000040874900_C8	167098_ABC8_000040874900_C8	F	64796039	http://lgt.igs.umaryland.edu/traces/64796039_167098_ABC8_000040874900_C8.html	http://trace.ncbi.nlm.nih.gov/Traces/trace.cgi?&cmd=retrieve&val=TRACE_NAME='64796039' and TEMPLATE_ID='167098_ABC8_000040874900_C8'&dopt=trace&size=1&seeas=Show	Propionibacterium	133	2e-52	NA18507	ABC	Human_NA18507	ABC8		2005-11-28	ZS	42235400	c8	WGA
		167098_ABC8_000040894500_L11	167098_ABC8_000040894500_L11	R	65013403	http://lgt.igs.umaryland.edu/traces/65013403_167098_ABC8_000040894500_L11.html	http://trace.ncbi.nlm.nih.gov/Traces/trace.cgi?&cmd=retrieve&val=TRACE_NAME='65013403' and TEMPLATE_ID='167098_ABC8_000040894500_L11'&dopt=trace&size=1&seeas=Show	Propionibacterium	208	9e-107	NA18507	ABC	Human_NA18507	ABC8		2005-12-03	ZB	42281400	l11	WGA
		167098_ABC8_000040871400_F16	167098_ABC8_000040871400_F16	F	64832364	http://lgt.igs.umaryland.edu/traces/64832364_167098_ABC8_000040871400_F16.html	http://trace.ncbi.nlm.nih.gov/Traces/trace.cgi?&cmd=retrieve&val=TRACE_NAME='64832364' and TEMPLATE_ID='167098_ABC8_000040871400_F16'&dopt=trace&size=1&seeas=Show	Propionibacterium	273	7e-141	NA18507	ABC	Human_NA18507	ABC8		2005-11-28	ZK	42201200	f16	WGA
		167098_ABC8_000041028900_H13	167098_ABC8_000041028900_H13	F	65991754	http://lgt.igs.umaryland.edu/traces/65991754_167098_ABC8_000041028900_H13.html	http://trace.ncbi.nlm.nih.gov/Traces/trace.cgi?&cmd=retrieve&val=TRACE_NAME='65991754' and TEMPLATE_ID='167098_ABC8_000041028900_H13'&dopt=trace&size=1&seeas=Show	Propionibacterium	201	2e-107	NA18507	ABC	Human_NA18507	ABC8		2005-12-15	AB	45561900	h13	WGA
		167098_ABC8_000040869500_P13	167098_ABC8_000040869500_P13	R	64870554	http://lgt.igs.umaryland.edu/traces/64870554_167098_ABC8_000040869500_P13.html	http://trace.ncbi.nlm.nih.gov/Traces/trace.cgi?&cmd=retrieve&val=TRACE_NAME='64870554' and TEMPLATE_ID='167098_ABC8_000040869500_P13'&dopt=trace&size=1&seeas=Show	Propionibacterium	126	8e-63	NA18507	ABC	Human_NA18507	ABC8		2005-11-29	ZJ	42253600	p13	WGA
		167098_ABC8_000040991900_O16	167098_ABC8_000040991900_O16	R	65686164	http://lgt.igs.umaryland.edu/traces/65686164_167098_ABC8_000040991900_O16.html	http://trace.ncbi.nlm.nih.gov/Traces/trace.cgi?&cmd=retrieve&val=TRACE_NAME='65686164' and TEMPLATE_ID='167098_ABC8_000040991900_O16'&dopt=trace&size=1&seeas=Show	Propionibacterium	228	1e-118	NA18507	ABC	Human_NA18507	ABC8		2005-12-12	ZT	41010800	o16	WGA
		166205_ABC8_000043035000_N8	166205_ABC8_000043035000_N8	R	61788057	http://lgt.igs.umaryland.edu/traces/61788057_166205_ABC8_000043035000_N8.html	http://trace.ncbi.nlm.nih.gov/Traces/trace.cgi?&cmd=retrieve&val=TRACE_NAME='61788057' and TEMPLATE_ID='166205_ABC8_000043035000_N8'&dopt=trace&size=1&seeas=Show	Propionibacterium	102	3e-48	NA18507	ABC	Human_NA18507	ABC8		2005-10-04	AD	41968500	n8	WGA
		167098_ABC8_000041049800_A6	167098_ABC8_000041049800_A6	F	66192431	http://lgt.igs.umaryland.edu/traces/66192431_167098_ABC8_000041049800_A6.html	http://trace.ncbi.nlm.nih.gov/Traces/trace.cgi?&cmd=retrieve&val=TRACE_NAME='66192431' and TEMPLATE_ID='167098_ABC8_000041049800_A6'&dopt=trace&size=1&seeas=Show	Propionibacterium	249	9e-129	NA18507	ABC	Human_NA18507	ABC8		2005-12-18	ZS	44902300	a6	WGA
		167098_ABC8_000041009700_K20	167098_ABC8_000041009700_K20	F	65740608	http://lgt.igs.umaryland.edu/traces/65740608_167098_ABC8_000041009700_K20.html	http://trace.ncbi.nlm.nih.gov/Traces/trace.cgi?&cmd=retrieve&val=TRACE_NAME='65740608' and TEMPLATE_ID='167098_ABC8_000041009700_K20'&dopt=trace&size=1&seeas=Show	Propionibacterium	165	1e-78	NA18507	ABC	Human_NA18507	ABC8		2005-12-13	ZL	45551200	k20	WGA
		167098_ABC8_000040965700_D4	167098_ABC8_000040965700_D4	F	65332078	http://lgt.igs.umaryland.edu/traces/65332078_167098_ABC8_000040965700_D4.html	http://trace.ncbi.nlm.nih.gov/Traces/trace.cgi?&cmd=retrieve&val=TRACE_NAME='65332078' and TEMPLATE_ID='167098_ABC8_000040965700_D4'&dopt=trace&size=1&seeas=Show	Propionibacterium	143	2e-58	NA18507	ABC	Human_NA18507	ABC8		2005-12-08	ZQ	44853600	d4	WGA
		167098_ABC8_000042167800_H8	167098_ABC8_000042167800_H8	F	64777894	http://lgt.igs.umaryland.edu/traces/64777894_167098_ABC8_000042167800_H8.html	http://trace.ncbi.nlm.nih.gov/Traces/trace.cgi?&cmd=retrieve&val=TRACE_NAME='64777894' and TEMPLATE_ID='167098_ABC8_000042167800_H8'&dopt=trace&size=1&seeas=Show	Propionibacterium	410	0	NA18507	ABC	Human_NA18507	ABC8		2005-11-28	ZY	42213300	h8	WGA
		167098_ABC8_000040912700_C23	167098_ABC8_000040912700_C23	R	65211084	http://lgt.igs.umaryland.edu/traces/65211084_167098_ABC8_000040912700_C23.html	http://trace.ncbi.nlm.nih.gov/Traces/trace.cgi?&cmd=retrieve&val=TRACE_NAME='65211084' and TEMPLATE_ID='167098_ABC8_000040912700_C23'&dopt=trace&size=1&seeas=Show	Propionibacterium	126	2e-55	NA18507	ABC	Human_NA18507	ABC8		2005-12-06	ZW	44804600	c23	WGA
		167098_ABC8_000040909900_H24	167098_ABC8_000040909900_H24	F	65144430	http://lgt.igs.umaryland.edu/traces/65144430_167098_ABC8_000040909900_H24.html	http://trace.ncbi.nlm.nih.gov/Traces/trace.cgi?&cmd=retrieve&val=TRACE_NAME='65144430' and TEMPLATE_ID='167098_ABC8_000040909900_H24'&dopt=trace&size=1&seeas=Show	Propionibacterium	155	1e-65	NA18507	ABC	Human_NA18507	ABC8		2005-12-05	AA	40949800	h24	WGA
		167098_ABC8_000000685022_I21	167098_ABC8_000000685022_I21	R	64548003	http://lgt.igs.umaryland.edu/traces/64548003_167098_ABC8_000000685022_I21.html	http://trace.ncbi.nlm.nih.gov/Traces/trace.cgi?&cmd=retrieve&val=TRACE_NAME='64548003' and TEMPLATE_ID='167098_ABC8_000000685022_I21'&dopt=trace&size=1&seeas=Show	Propionibacterium	564	0	NA18507	ABC	Human_NA18507	ABC8		2005-11-24	AA	42146900	i21	WGA
		167098_ABC8_000040862300_K18	167098_ABC8_000040862300_K18	R	64734504	http://lgt.igs.umaryland.edu/traces/64734504_167098_ABC8_000040862300_K18.html	http://trace.ncbi.nlm.nih.gov/Traces/trace.cgi?&cmd=retrieve&val=TRACE_NAME='64734504' and TEMPLATE_ID='167098_ABC8_000040862300_K18'&dopt=trace&size=1&seeas=Show	Propionibacterium	159	2e-58	NA18507	ABC	Human_NA18507	ABC8		2005-11-28	ZU	42213000	k18	WGA
		167098_ABC8_000041072400_E19	167098_ABC8_000041072400_E19	R	66631507	http://lgt.igs.umaryland.edu/traces/66631507_167098_ABC8_000041072400_E19.html	http://trace.ncbi.nlm.nih.gov/Traces/trace.cgi?&cmd=retrieve&val=TRACE_NAME='66631507' and TEMPLATE_ID='167098_ABC8_000041072400_E19'&dopt=trace&size=1&seeas=Show	Propionibacterium	101	1e-47	NA18507	ABC	Human_NA18507	ABC8		2005-12-24	ZJ	44933600	e19	WGA
		167098_ABC8_000041064400_G10	167098_ABC8_000041064400_G10	F	66486028	http://lgt.igs.umaryland.edu/traces/66486028_167098_ABC8_000041064400_G10.html	http://trace.ncbi.nlm.nih.gov/Traces/trace.cgi?&cmd=retrieve&val=TRACE_NAME='66486028' and TEMPLATE_ID='167098_ABC8_000041064400_G10'&dopt=trace&size=1&seeas=Show	Propionibacterium	303	1e-127	NA18507	ABC	Human_NA18507	ABC8		2005-12-23	AA	44915400	g10	WGA
		167098_ABC8_000041052400_H20	167098_ABC8_000041052400_H20	F	66311659	http://lgt.igs.umaryland.edu/traces/66311659_167098_ABC8_000041052400_H20.html	http://trace.ncbi.nlm.nih.gov/Traces/trace.cgi?&cmd=retrieve&val=TRACE_NAME='66311659' and TEMPLATE_ID='167098_ABC8_000041052400_H20'&dopt=trace&size=1&seeas=Show	Propionibacterium	112	2e-54	NA18507	ABC	Human_NA18507	ABC8		2005-12-19	ZK	45576200	h20	WGA
		H_HD-1013C10	ABC18-1013C10	R	H_HD-1013C10.g1	http://lgt.igs.umaryland.edu/traces/H_HD-1013C10.g1_H_HD-1013C10.html	http://trace.ncbi.nlm.nih.gov/Traces/trace.cgi?&cmd=retrieve&val=TRACE_NAME='H_HD-1013C10.g1' and TEMPLATE_ID='H_HD-1013C10'&dopt=trace&size=1&seeas=Show	Propionibacterium	124	3e-26		WUGSC	H_HD-08-08-05	2181626703	0j00gG	2008-08-04	915	2h08HG	c10	CloneEnd
		239c10_o2b03c9		R	239c10_o2b03c9.r1	http://lgt.igs.umaryland.edu/traces/239c10_o2b03c9.r1_239c10_o2b03c9.html	http://trace.ncbi.nlm.nih.gov/Traces/trace.cgi?&cmd=retrieve&val=TRACE_NAME='239c10_o2b03c9.r1' and TEMPLATE_ID='239c10_o2b03c9'&dopt=trace&size=1&seeas=Show	Propionibacterium	125	6e-62		UOKNOR	239c10
		166083_ABC8_000043011600_C15	166083_ABC8_000043011600_C15	R	61684132	http://lgt.igs.umaryland.edu/traces/61684132_166083_ABC8_000043011600_C15.html	http://trace.ncbi.nlm.nih.gov/Traces/trace.cgi?&cmd=retrieve&val=TRACE_NAME='61684132' and TEMPLATE_ID='166083_ABC8_000043011600_C15'&dopt=trace&size=1&seeas=Show	Propionibacterium	208	1e-111	NA18507	ABC	Human_NA18507	ABC8		2005-10-03	ZL	42674800	c15	WGA
		165972_ABC8_000042998400_K8	165972_ABC8_000042998400_K8	R	61490598	http://lgt.igs.umaryland.edu/traces/61490598_165972_ABC8_000042998400_K8.html	http://trace.ncbi.nlm.nih.gov/Traces/trace.cgi?&cmd=retrieve&val=TRACE_NAME='61490598' and TEMPLATE_ID='165972_ABC8_000042998400_K8'&dopt=trace&size=1&seeas=Show	Propionibacterium	262	9e-144	NA18507	ABC	Human_NA18507	ABC8		2005-09-30	ZV	42616200	k8	WGA
		165807_ABC8_000005717449_H13	165807_ABC8_000005717449_H13	R	60826627	http://lgt.igs.umaryland.edu/traces/60826627_165807_ABC8_000005717449_H13.html	http://trace.ncbi.nlm.nih.gov/Traces/trace.cgi?&cmd=retrieve&val=TRACE_NAME='60826627' and TEMPLATE_ID='165807_ABC8_000005717449_H13'&dopt=trace&size=1&seeas=Show	Propionibacterium	126	2e-60	NA18507	ABC	Human_NA18507	ABC8		2005-09-24	ZF	5753049	h13	WGA
		166941_ABC7_000042750500_P2	166941_ABC7_000042750500_P2	R	62709550	http://lgt.igs.umaryland.edu/traces/62709550_166941_ABC7_000042750500_P2.html	http://trace.ncbi.nlm.nih.gov/Traces/trace.cgi?&cmd=retrieve&val=TRACE_NAME='62709550' and TEMPLATE_ID='166941_ABC7_000042750500_P2'&dopt=trace&size=1&seeas=Show	Propionibacterium	276	4e-152	NA18517	ABC	Human_NA18517	ABC7		2005-10-22	AD	42039100	p2	WGA
		166910_ABC8_000042068000_P1	166910_ABC8_000042068000_P1	F	62966254	http://lgt.igs.umaryland.edu/traces/62966254_166910_ABC8_000042068000_P1.html	http://trace.ncbi.nlm.nih.gov/Traces/trace.cgi?&cmd=retrieve&val=TRACE_NAME='62966254' and TEMPLATE_ID='166910_ABC8_000042068000_P1'&dopt=trace&size=1&seeas=Show	Propionibacterium	234	2e-122	NA18507	ABC	Human_NA18507	ABC8		2005-10-29	ZQ	43148000	p1	WGA
		ABC8_000042664000_E22	ABC8_000042664000_E22	F	61737647	http://lgt.igs.umaryland.edu/traces/61737647_ABC8_000042664000_E22.html	http://trace.ncbi.nlm.nih.gov/Traces/trace.cgi?&cmd=retrieve&val=TRACE_NAME='61737647' and TEMPLATE_ID='ABC8_000042664000_E22'&dopt=trace&size=1&seeas=Show	Propionibacterium	163	7e-80	NA18507	ABC	Human_NA18507	ABC8		2005-10-03	ZD	41814000	e22	WGA
		165972_ABC8_000043007000_I22	165972_ABC8_000043007000_I22	F	61424417	http://lgt.igs.umaryland.edu/traces/61424417_165972_ABC8_000043007000_I22.html	http://trace.ncbi.nlm.nih.gov/Traces/trace.cgi?&cmd=retrieve&val=TRACE_NAME='61424417' and TEMPLATE_ID='165972_ABC8_000043007000_I22'&dopt=trace&size=1&seeas=Show	Propionibacterium	277	3e-150	NA18507	ABC	Human_NA18507	ABC8		2005-09-29	ZS	42610300	i22	WGA
		166910_ABC8_000042067300_E7	166910_ABC8_000042067300_E7	F	62978051	http://lgt.igs.umaryland.edu/traces/62978051_166910_ABC8_000042067300_E7.html	http://trace.ncbi.nlm.nih.gov/Traces/trace.cgi?&cmd=retrieve&val=TRACE_NAME='62978051' and TEMPLATE_ID='166910_ABC8_000042067300_E7'&dopt=trace&size=1&seeas=Show	Propionibacterium	116	1e-56	NA18507	ABC	Human_NA18507	ABC8		2005-10-30	AA	43149600	e7	WGA
		165972_ABC8_000042557700_O17	165972_ABC8_000042557700_O17	R	61393006	http://lgt.igs.umaryland.edu/traces/61393006_165972_ABC8_000042557700_O17.html	http://trace.ncbi.nlm.nih.gov/Traces/trace.cgi?&cmd=retrieve&val=TRACE_NAME='61393006' and TEMPLATE_ID='165972_ABC8_000042557700_O17'&dopt=trace&size=1&seeas=Show	Propionibacterium	210	2e-110	NA18507	ABC	Human_NA18507	ABC8		2005-09-29	ZF	42597300	o17	WGA
		166020_ABC8_000043000200_K7	166020_ABC8_000043000200_K7	R	61467460	http://lgt.igs.umaryland.edu/traces/61467460_166020_ABC8_000043000200_K7.html	http://trace.ncbi.nlm.nih.gov/Traces/trace.cgi?&cmd=retrieve&val=TRACE_NAME='61467460' and TEMPLATE_ID='166020_ABC8_000043000200_K7'&dopt=trace&size=1&seeas=Show	Propionibacterium	256	2e-135	NA18507	ABC	Human_NA18507	ABC8		2005-09-30	AA	42620700	k7	WGA
		167023_ABC8_000000445842_D6	167023_ABC8_000000445842_D6	R	62926682	http://lgt.igs.umaryland.edu/traces/62926682_167023_ABC8_000000445842_D6.html	http://trace.ncbi.nlm.nih.gov/Traces/trace.cgi?&cmd=retrieve&val=TRACE_NAME='62926682' and TEMPLATE_ID='167023_ABC8_000000445842_D6'&dopt=trace&size=1&seeas=Show	Propionibacterium	102	1e-43	NA18507	ABC	Human_NA18507	ABC8		2005-10-28	ZI	448342	d6	WGA
		1210216_ABC14_4_1_000050411400_O5	1210216_ABC14_4_1_000050411400_O5	F	106466588	http://lgt.igs.umaryland.edu/traces/106466588_1210216_ABC14_4_1_000050411400_O5.html	http://trace.ncbi.nlm.nih.gov/Traces/trace.cgi?&cmd=retrieve&val=TRACE_NAME='106466588' and TEMPLATE_ID='1210216_ABC14_4_1_000050411400_O5'&dopt=trace&size=1&seeas=Show	Propionibacterium	114	1e-50	NA12156	ABC	Human_NA12156	ABC14_4_1		2007-03-02	AE	51339200	o5	WGA
		Chr_13_17119_2-515g06		F	Chr_13_17119_2-515g06.p1k	http://lgt.igs.umaryland.edu/traces/Chr_13_17119_2-515g06.p1k_Chr_13_17119_2-515g06.html	http://trace.ncbi.nlm.nih.gov/Traces/trace.cgi?&cmd=retrieve&val=TRACE_NAME='Chr_13_17119_2-515g06.p1k' and TEMPLATE_ID='Chr_13_17119_2-515g06'&dopt=trace&size=1&seeas=Show	Propionibacterium	241	6e-124	NA17119	SC	Chr_13_17119	60721		2003-06-23		Chr_13_17119_2-515	g06	SNP
		164507_HUMAN_NA18517_FOSMID-014_N8	ABC7_000040621400_N8	R	57258367	http://lgt.igs.umaryland.edu/traces/57258367_164507_HUMAN_NA18517_FOSMID-014_N8.html	http://trace.ncbi.nlm.nih.gov/Traces/trace.cgi?&cmd=retrieve&val=TRACE_NAME='57258367' and TEMPLATE_ID='164507_HUMAN_NA18517_FOSMID-014_N8'&dopt=trace&size=1&seeas=Show	Propionibacterium	135	3e-63	NA18517	ABC	Human_NA18517	Human_NA18517		2005-08-10	ZB	41831100	n8	WGA
		163460_ABC7_000040592900_M10	ABC7_000040592900_M10	R	55047953	http://lgt.igs.umaryland.edu/traces/55047953_163460_ABC7_000040592900_M10.html	http://trace.ncbi.nlm.nih.gov/Traces/trace.cgi?&cmd=retrieve&val=TRACE_NAME='55047953' and TEMPLATE_ID='163460_ABC7_000040592900_M10'&dopt=trace&size=1&seeas=Show	Propionibacterium	194	8e-89	NA18517	ABC	Human_NA18517	ABC7		2005-06-22	AG	41714500	m10	WGA
		165431_ABC7_000040715400_J20	165431_ABC7_000040715400_J20	F	59062879	http://lgt.igs.umaryland.edu/traces/59062879_165431_ABC7_000040715400_J20.html	http://trace.ncbi.nlm.nih.gov/Traces/trace.cgi?&cmd=retrieve&val=TRACE_NAME='59062879' and TEMPLATE_ID='165431_ABC7_000040715400_J20'&dopt=trace&size=1&seeas=Show	Propionibacterium	179	5e-87	NA18517	ABC	Human_NA18517	ABC7		2005-09-07	ZG	40726300	j20	WGA
		165422_ABC7_000042411100_P3	165422_ABC7_000042411100_P3	R	58915052	http://lgt.igs.umaryland.edu/traces/58915052_165422_ABC7_000042411100_P3.html	http://trace.ncbi.nlm.nih.gov/Traces/trace.cgi?&cmd=retrieve&val=TRACE_NAME='58915052' and TEMPLATE_ID='165422_ABC7_000042411100_P3'&dopt=trace&size=1&seeas=Show	Propionibacterium	129	2e-64	NA18517	ABC	Human_NA18517	ABC7		2005-09-04	ZU	40192600	p3	WGA
		165570_ABC7_000042473300_B16	165570_ABC7_000042473300_B16	R	59503495	http://lgt.igs.umaryland.edu/traces/59503495_165570_ABC7_000042473300_B16.html	http://trace.ncbi.nlm.nih.gov/Traces/trace.cgi?&cmd=retrieve&val=TRACE_NAME='59503495' and TEMPLATE_ID='165570_ABC7_000042473300_B16'&dopt=trace&size=1&seeas=Show	Propionibacterium	128	5e-59	NA18517	ABC	Human_NA18517	ABC7		2005-09-12	ZX	42819700	b16	WGA
		165570_ABC7_000042472500_C2	165570_ABC7_000042472500_C2	R	59503654	http://lgt.igs.umaryland.edu/traces/59503654_165570_ABC7_000042472500_C2.html	http://trace.ncbi.nlm.nih.gov/Traces/trace.cgi?&cmd=retrieve&val=TRACE_NAME='59503654' and TEMPLATE_ID='165570_ABC7_000042472500_C2'&dopt=trace&size=1&seeas=Show	Propionibacterium	161	4e-81	NA18517	ABC	Human_NA18517	ABC7		2005-09-12	ZX	42819100	c2	WGA
		165431_ABC7_000042419400_E11	165431_ABC7_000042419400_E11	R	58965469	http://lgt.igs.umaryland.edu/traces/58965469_165431_ABC7_000042419400_E11.html	http://trace.ncbi.nlm.nih.gov/Traces/trace.cgi?&cmd=retrieve&val=TRACE_NAME='58965469' and TEMPLATE_ID='165431_ABC7_000042419400_E11'&dopt=trace&size=1&seeas=Show	Propionibacterium	103	6e-49	NA18517	ABC	Human_NA18517	ABC7		2005-09-06	ZU	41871900	e11	WGA
		165433_ABC7_000042434600_D9	165433_ABC7_000042434600_D9	F	59109352	http://lgt.igs.umaryland.edu/traces/59109352_165433_ABC7_000042434600_D9.html	http://trace.ncbi.nlm.nih.gov/Traces/trace.cgi?&cmd=retrieve&val=TRACE_NAME='59109352' and TEMPLATE_ID='165433_ABC7_000042434600_D9'&dopt=trace&size=1&seeas=Show	Propionibacterium	264	7e-145	NA18517	ABC	Human_NA18517	ABC7		2005-09-07	ZR	40760900	d9	WGA
		165434_ABC7_000042456300_O7	165434_ABC7_000042456300_O7	F	59213778	http://lgt.igs.umaryland.edu/traces/59213778_165434_ABC7_000042456300_O7.html	http://trace.ncbi.nlm.nih.gov/Traces/trace.cgi?&cmd=retrieve&val=TRACE_NAME='59213778' and TEMPLATE_ID='165434_ABC7_000042456300_O7'&dopt=trace&size=1&seeas=Show	Propionibacterium	137	3e-69	NA18517	ABC	Human_NA18517	ABC7		2005-09-09	ZU	40766600	o7	WGA
		165377_ABC7_000042425100_B2	165377_ABC7_000042425100_B2	R	59016599	http://lgt.igs.umaryland.edu/traces/59016599_165377_ABC7_000042425100_B2.html	http://trace.ncbi.nlm.nih.gov/Traces/trace.cgi?&cmd=retrieve&val=TRACE_NAME='59016599' and TEMPLATE_ID='165377_ABC7_000042425100_B2'&dopt=trace&size=1&seeas=Show	Propionibacterium	126	8e-58	NA18517	ABC	Human_NA18517	ABC7		2005-09-06	ZG	40721300	b2	WGA
		H_HN-1401C09	ABC24-1401C9	R	H_HN-1401C09.g1	http://lgt.igs.umaryland.edu/traces/H_HN-1401C09.g1_H_HN-1401C09.html	http://trace.ncbi.nlm.nih.gov/Traces/trace.cgi?&cmd=retrieve&val=TRACE_NAME='H_HN-1401C09.g1' and TEMPLATE_ID='H_HN-1401C09'&dopt=trace&size=1&seeas=Show	Propionibacterium	433	0	NA18502	WUGSC	H_HN-08-05-20	2340128850	0j0096	2008-05-19	864	2h0be0	c09	CloneEnd
		1061017581279		F	1099289252349	http://lgt.igs.umaryland.edu/traces/1099289252349_1061017581279.html	http://trace.ncbi.nlm.nih.gov/Traces/trace.cgi?&cmd=retrieve&val=TRACE_NAME='1099289252349' and TEMPLATE_ID='1061017581279'&dopt=trace&size=1&seeas=Show	Propionibacterium	261	8e-117		JCVI	Genomic-Sequencing-Diploid-Human-Reference-Genome	Genomic-Sequencing-Diploid-Human-Reference-Genome_HuRef-F-10-40Kb	1064038009668	2005-09-21		F037899	a17	WGA
		HDKLP0228A	RP11-287J11	R	HDKLP1E0228A	http://lgt.igs.umaryland.edu/traces/HDKLP1E0228A_HDKLP0228A.html	http://trace.ncbi.nlm.nih.gov/Traces/trace.cgi?&cmd=retrieve&val=TRACE_NAME='HDKLP1E0228A' and TEMPLATE_ID='HDKLP0228A'&dopt=trace&size=1&seeas=Show	Propionibacterium	117	2e-52		BCM	HDKL		171710		nzd	HDKLP1E0200		Clone
	Pseudomonas
		HDNUP0904A	RP11-733O18	R	HDNUP1E0904A	http://lgt.igs.umaryland.edu/traces/HDNUP1E0904A_HDNUP0904A.html	http://trace.ncbi.nlm.nih.gov/Traces/trace.cgi?&cmd=retrieve&val=TRACE_NAME='HDNUP1E0904A' and TEMPLATE_ID='HDNUP0904A'&dopt=trace&size=1&seeas=Show	Pseudomonas	146	4e-60		BCM	HDNU		244144	2001-10-21	con	HDNUP1E0900		Clone
		171515_ABC9_3_5_000043936700_M1	171515_ABC9_3_5_000043936700_M1	F	72983652	http://lgt.igs.umaryland.edu/traces/72983652_171515_ABC9_3_5_000043936700_M1.html	http://trace.ncbi.nlm.nih.gov/Traces/trace.cgi?&cmd=retrieve&val=TRACE_NAME='72983652' and TEMPLATE_ID='171515_ABC9_3_5_000043936700_M1'&dopt=trace&size=1&seeas=Show	Pseudomonas	146	1e-74	NA18956	ABC	Human_NA18956	ABC9_3_5		2006-03-07	ZH	46180900	m1	WGA
		171515_ABC9_3_5_000043918500_B16	171515_ABC9_3_5_000043918500_B16	R	72762819	http://lgt.igs.umaryland.edu/traces/72762819_171515_ABC9_3_5_000043918500_B16.html	http://trace.ncbi.nlm.nih.gov/Traces/trace.cgi?&cmd=retrieve&val=TRACE_NAME='72762819' and TEMPLATE_ID='171515_ABC9_3_5_000043918500_B16'&dopt=trace&size=1&seeas=Show	Pseudomonas	172	3e-85	NA18956	ABC	Human_NA18956	ABC9_3_5		2006-03-06	AE	46148500	b16	WGA
		171515_ABC9_3_5_000043938000_D15	171515_ABC9_3_5_000043938000_D15	F	73046959	http://lgt.igs.umaryland.edu/traces/73046959_171515_ABC9_3_5_000043938000_D15.html	http://trace.ncbi.nlm.nih.gov/Traces/trace.cgi?&cmd=retrieve&val=TRACE_NAME='73046959' and TEMPLATE_ID='171515_ABC9_3_5_000043938000_D15'&dopt=trace&size=1&seeas=Show	Pseudomonas	101	1e-47	NA18956	ABC	Human_NA18956	ABC9_3_5		2006-03-08	ZM	46198500	d15	WGA
		170215_ABC9_3_2_000043892700_M6	170215_ABC9_3_2_000043892700_M6	R	72290629	http://lgt.igs.umaryland.edu/traces/72290629_170215_ABC9_3_2_000043892700_M6.html	http://trace.ncbi.nlm.nih.gov/Traces/trace.cgi?&cmd=retrieve&val=TRACE_NAME='72290629' and TEMPLATE_ID='170215_ABC9_3_2_000043892700_M6'&dopt=trace&size=1&seeas=Show	Pseudomonas	396	1e-173	NA18956	ABC	Human_NA18956	ABC9_3_2		2006-03-02	ZD	46060400	m6	WGA
		172343_ABC9_3_5_000043962400_H1	172343_ABC9_3_5_000043962400_H1	F	74083405	http://lgt.igs.umaryland.edu/traces/74083405_172343_ABC9_3_5_000043962400_H1.html	http://trace.ncbi.nlm.nih.gov/Traces/trace.cgi?&cmd=retrieve&val=TRACE_NAME='74083405' and TEMPLATE_ID='172343_ABC9_3_5_000043962400_H1'&dopt=trace&size=1&seeas=Show	Pseudomonas	104	1e-37	NA18956	ABC	Human_NA18956	ABC9_3_5		2006-03-17	AK	45292000	h1	WGA
		171515_ABC9_3_5_000043885500_N9	171515_ABC9_3_5_000043885500_N9	R	72387976	http://lgt.igs.umaryland.edu/traces/72387976_171515_ABC9_3_5_000043885500_N9.html	http://trace.ncbi.nlm.nih.gov/Traces/trace.cgi?&cmd=retrieve&val=TRACE_NAME='72387976' and TEMPLATE_ID='171515_ABC9_3_5_000043885500_N9'&dopt=trace&size=1&seeas=Show	Pseudomonas	165	9e-67	NA18956	ABC	Human_NA18956	ABC9_3_5		2006-03-02	ZM	46088900	n9	WGA
		171515_ABC9_3_5_000043920800_O24	171515_ABC9_3_5_000043920800_O24	F	72834588	http://lgt.igs.umaryland.edu/traces/72834588_171515_ABC9_3_5_000043920800_O24.html	http://trace.ncbi.nlm.nih.gov/Traces/trace.cgi?&cmd=retrieve&val=TRACE_NAME='72834588' and TEMPLATE_ID='171515_ABC9_3_5_000043920800_O24'&dopt=trace&size=1&seeas=Show	Pseudomonas	195	5e-99	NA18956	ABC	Human_NA18956	ABC9_3_5		2006-03-07	ZN	46155100	o24	WGA
		171515_ABC9_3_5_000043916300_B9	171515_ABC9_3_5_000043916300_B9	R	72600027	http://lgt.igs.umaryland.edu/traces/72600027_171515_ABC9_3_5_000043916300_B9.html	http://trace.ncbi.nlm.nih.gov/Traces/trace.cgi?&cmd=retrieve&val=TRACE_NAME='72600027' and TEMPLATE_ID='171515_ABC9_3_5_000043916300_B9'&dopt=trace&size=1&seeas=Show	Pseudomonas	113	7e-55	NA18956	ABC	Human_NA18956	ABC9_3_5		2006-03-05	AC	46131700	b9	WGA
		171515_ABC9_3_5_000043936500_O9	171515_ABC9_3_5_000043936500_O9	F	73006004	http://lgt.igs.umaryland.edu/traces/73006004_171515_ABC9_3_5_000043936500_O9.html	http://trace.ncbi.nlm.nih.gov/Traces/trace.cgi?&cmd=retrieve&val=TRACE_NAME='73006004' and TEMPLATE_ID='171515_ABC9_3_5_000043936500_O9'&dopt=trace&size=1&seeas=Show	Pseudomonas	324	8e-138	NA18956	ABC	Human_NA18956	ABC9_3_5		2006-03-09	AE	46175500	o9	WGA
		170215_ABC9_000043898200_J22	170215_ABC9_000043898200_J22	R	72510454	http://lgt.igs.umaryland.edu/traces/72510454_170215_ABC9_000043898200_J22.html	http://trace.ncbi.nlm.nih.gov/Traces/trace.cgi?&cmd=retrieve&val=TRACE_NAME='72510454' and TEMPLATE_ID='170215_ABC9_000043898200_J22'&dopt=trace&size=1&seeas=Show	Pseudomonas	175	4e-87	NA18956	ABC	Human_NA18956	ABC9		2006-03-04	AE	46089700	j22	WGA
		171515_ABC9_3_5_000043952500_P11	171515_ABC9_3_5_000043952500_P11	F	73451148	http://lgt.igs.umaryland.edu/traces/73451148_171515_ABC9_3_5_000043952500_P11.html	http://trace.ncbi.nlm.nih.gov/Traces/trace.cgi?&cmd=retrieve&val=TRACE_NAME='73451148' and TEMPLATE_ID='171515_ABC9_3_5_000043952500_P11'&dopt=trace&size=1&seeas=Show	Pseudomonas	152	2e-73	NA18956	ABC	Human_NA18956	ABC9_3_5		2006-03-12	ZS	45272600	p11	WGA
		171515_ABC9_3_5_000043955500_F5	171515_ABC9_3_5_000043955500_F5	F	73547561	http://lgt.igs.umaryland.edu/traces/73547561_171515_ABC9_3_5_000043955500_F5.html	http://trace.ncbi.nlm.nih.gov/Traces/trace.cgi?&cmd=retrieve&val=TRACE_NAME='73547561' and TEMPLATE_ID='171515_ABC9_3_5_000043955500_F5'&dopt=trace&size=1&seeas=Show	Pseudomonas	124	2e-61	NA18956	ABC	Human_NA18956	ABC9_3_5		2006-03-13	AH	46227900	f5	WGA
		171515_ABC9_3_5_000046214200_M20	171515_ABC9_3_5_000046214200_M20	R	73699277	http://lgt.igs.umaryland.edu/traces/73699277_171515_ABC9_3_5_000046214200_M20.html	http://trace.ncbi.nlm.nih.gov/Traces/trace.cgi?&cmd=retrieve&val=TRACE_NAME='73699277' and TEMPLATE_ID='171515_ABC9_3_5_000046214200_M20'&dopt=trace&size=1&seeas=Show	Pseudomonas	153	2e-76	NA18956	ABC	Human_NA18956	ABC9_3_5		2006-03-14	ZH	46241700	m20	WGA
		171515_ABC9_3_5_000043919700_B7	171515_ABC9_3_5_000043919700_B7	R	72758915	http://lgt.igs.umaryland.edu/traces/72758915_171515_ABC9_3_5_000043919700_B7.html	http://trace.ncbi.nlm.nih.gov/Traces/trace.cgi?&cmd=retrieve&val=TRACE_NAME='72758915' and TEMPLATE_ID='171515_ABC9_3_5_000043919700_B7'&dopt=trace&size=1&seeas=Show	Pseudomonas	176	3e-85	NA18956	ABC	Human_NA18956	ABC9_3_5		2006-03-06	ZS	46135500	b7	WGA
		171515_ABC9_3_5_000043944500_F22	171515_ABC9_3_5_000043944500_F22	F	73021609	http://lgt.igs.umaryland.edu/traces/73021609_171515_ABC9_3_5_000043944500_F22.html	http://trace.ncbi.nlm.nih.gov/Traces/trace.cgi?&cmd=retrieve&val=TRACE_NAME='73021609' and TEMPLATE_ID='171515_ABC9_3_5_000043944500_F22'&dopt=trace&size=1&seeas=Show	Pseudomonas	311	2e-132	NA18956	ABC	Human_NA18956	ABC9_3_5		2006-03-09	ZI	46192000	f22	WGA
		171515_ABC9_3_5_000043951100_J7	171515_ABC9_3_5_000043951100_J7	R	73425727	http://lgt.igs.umaryland.edu/traces/73425727_171515_ABC9_3_5_000043951100_J7.html	http://trace.ncbi.nlm.nih.gov/Traces/trace.cgi?&cmd=retrieve&val=TRACE_NAME='73425727' and TEMPLATE_ID='171515_ABC9_3_5_000043951100_J7'&dopt=trace&size=1&seeas=Show	Pseudomonas	140	8e-64	NA18956	ABC	Human_NA18956	ABC9_3_5		2006-03-12	ZG	45273900	j7	WGA
		171515_ABC9_3_5_000043946900_J19	171515_ABC9_3_5_000043946900_J19	R	73252975	http://lgt.igs.umaryland.edu/traces/73252975_171515_ABC9_3_5_000043946900_J19.html	http://trace.ncbi.nlm.nih.gov/Traces/trace.cgi?&cmd=retrieve&val=TRACE_NAME='73252975' and TEMPLATE_ID='171515_ABC9_3_5_000043946900_J19'&dopt=trace&size=1&seeas=Show	Pseudomonas	141	9e-67	NA18956	ABC	Human_NA18956	ABC9_3_5		2006-03-10	ZU	45259600	j19	WGA
		171515_ABC9_3_5_000046216800_L10	171515_ABC9_3_5_000046216800_L10	R	73625494	http://lgt.igs.umaryland.edu/traces/73625494_171515_ABC9_3_5_000046216800_L10.html	http://trace.ncbi.nlm.nih.gov/Traces/trace.cgi?&cmd=retrieve&val=TRACE_NAME='73625494' and TEMPLATE_ID='171515_ABC9_3_5_000046216800_L10'&dopt=trace&size=1&seeas=Show	Pseudomonas	259	4e-137	NA18956	ABC	Human_NA18956	ABC9_3_5		2006-03-13	ZS	46246500	l10	WGA
		172343_ABC9_3_5_000043988300_D20	172343_ABC9_3_5_000043988300_D20	R	74184711	http://lgt.igs.umaryland.edu/traces/74184711_172343_ABC9_3_5_000043988300_D20.html	http://trace.ncbi.nlm.nih.gov/Traces/trace.cgi?&cmd=retrieve&val=TRACE_NAME='74184711' and TEMPLATE_ID='172343_ABC9_3_5_000043988300_D20'&dopt=trace&size=1&seeas=Show	Pseudomonas	104	2e-49	NA18956	ABC	Human_NA18956	ABC9_3_5		2006-03-18	ZM	45316300	d20	WGA
		171515_ABC9_3_5_000046217300_M15	171515_ABC9_3_5_000046217300_M15	R	73701117	http://lgt.igs.umaryland.edu/traces/73701117_171515_ABC9_3_5_000046217300_M15.html	http://trace.ncbi.nlm.nih.gov/Traces/trace.cgi?&cmd=retrieve&val=TRACE_NAME='73701117' and TEMPLATE_ID='171515_ABC9_3_5_000046217300_M15'&dopt=trace&size=1&seeas=Show	Pseudomonas	170	1e-59	NA18956	ABC	Human_NA18956	ABC9_3_5		2006-03-14	AH	46248500	m15	WGA
		170215_ABC9_3_2_000046007800_E23	170215_ABC9_3_2_000046007800_E23	R	72288891	http://lgt.igs.umaryland.edu/traces/72288891_170215_ABC9_3_2_000046007800_E23.html	http://trace.ncbi.nlm.nih.gov/Traces/trace.cgi?&cmd=retrieve&val=TRACE_NAME='72288891' and TEMPLATE_ID='170215_ABC9_3_2_000046007800_E23'&dopt=trace&size=1&seeas=Show	Pseudomonas	364	0	NA18956	ABC	Human_NA18956	ABC9_3_2		2006-03-02	AH	46062400	e23	WGA
		172343_ABC9_3_5_000043963800_C10	172343_ABC9_3_5_000043963800_C10	F	73974657	http://lgt.igs.umaryland.edu/traces/73974657_172343_ABC9_3_5_000043963800_C10.html	http://trace.ncbi.nlm.nih.gov/Traces/trace.cgi?&cmd=retrieve&val=TRACE_NAME='73974657' and TEMPLATE_ID='172343_ABC9_3_5_000043963800_C10'&dopt=trace&size=1&seeas=Show	Pseudomonas	124	2e-61	NA18956	ABC	Human_NA18956	ABC9_3_5		2006-03-16	ZS	45295000	c10	WGA
		171515_ABC9_3_5_000043932600_C17	171515_ABC9_3_5_000043932600_C17	F	72978320	http://lgt.igs.umaryland.edu/traces/72978320_171515_ABC9_3_5_000043932600_C17.html	http://trace.ncbi.nlm.nih.gov/Traces/trace.cgi?&cmd=retrieve&val=TRACE_NAME='72978320' and TEMPLATE_ID='171515_ABC9_3_5_000043932600_C17'&dopt=trace&size=1&seeas=Show	Pseudomonas	158	7e-82	NA18956	ABC	Human_NA18956	ABC9_3_5		2006-03-07	ZV	46169400	c17	WGA
		171515_ABC9_3_5_000043931900_B19	171515_ABC9_3_5_000043931900_B19	F	72985413	http://lgt.igs.umaryland.edu/traces/72985413_171515_ABC9_3_5_000043931900_B19.html	http://trace.ncbi.nlm.nih.gov/Traces/trace.cgi?&cmd=retrieve&val=TRACE_NAME='72985413' and TEMPLATE_ID='171515_ABC9_3_5_000043931900_B19'&dopt=trace&size=1&seeas=Show	Pseudomonas	174	7e-89	NA18956	ABC	Human_NA18956	ABC9_3_5		2006-03-07	ZL	46176700	b19	WGA
		HEIUP1760	RP11-728G4	F	35500416	http://lgt.igs.umaryland.edu/traces/35500416_HEIUP1760.html	http://trace.ncbi.nlm.nih.gov/Traces/trace.cgi?&cmd=retrieve&val=TRACE_NAME='35500416' and TEMPLATE_ID='HEIUP1760'&dopt=trace&size=1&seeas=Show	Pseudomonas	370	0		BCM	HEIU	HEIUP	487907	2002-08-25	swz	HEIUP1D1700
		HEPKP0429	RP11-42N20	F	37136121	http://lgt.igs.umaryland.edu/traces/37136121_HEPKP0429.html	http://trace.ncbi.nlm.nih.gov/Traces/trace.cgi?&cmd=retrieve&val=TRACE_NAME='37136121' and TEMPLATE_ID='HEPKP0429'&dopt=trace&size=1&seeas=Show	Pseudomonas	156	2e-68		BCM	HEPK	HEPKP	509375	2002-09-21	mis	HEPKP1D0400
		HEOTP2576	RP11-447M4	F	38397005	http://lgt.igs.umaryland.edu/traces/38397005_HEOTP2576.html	http://trace.ncbi.nlm.nih.gov/Traces/trace.cgi?&cmd=retrieve&val=TRACE_NAME='38397005' and TEMPLATE_ID='HEOTP2576'&dopt=trace&size=1&seeas=Show	Pseudomonas	256	3e-73		BCM	HEOT	HEOTP	527207	2002-10-12	fin	HEOTP1D2500
		HENGP0256	RP11-577M5	R	36534746	http://lgt.igs.umaryland.edu/traces/36534746_HENGP0256.html	http://trace.ncbi.nlm.nih.gov/Traces/trace.cgi?&cmd=retrieve&val=TRACE_NAME='36534746' and TEMPLATE_ID='HENGP0256'&dopt=trace&size=1&seeas=Show	Pseudomonas	200	1e-87		BCM	HENG	HENGP	501913	2002-09-11	vmt	HENGP1E0200
		166910_ABC8_000042093700_B6	166910_ABC8_000042093700_B6	F	63221537	http://lgt.igs.umaryland.edu/traces/63221537_166910_ABC8_000042093700_B6.html	http://trace.ncbi.nlm.nih.gov/Traces/trace.cgi?&cmd=retrieve&val=TRACE_NAME='63221537' and TEMPLATE_ID='166910_ABC8_000042093700_B6'&dopt=trace&size=1&seeas=Show	Pseudomonas	112	3e-54	NA18507	ABC	Human_NA18507	ABC8		2005-11-03	ZJ	43195000	b6	WGA
		167000_ABC8_000002114340_A19	167000_ABC8_000002114340_A19	R	63974791	http://lgt.igs.umaryland.edu/traces/63974791_167000_ABC8_000002114340_A19.html	http://trace.ncbi.nlm.nih.gov/Traces/trace.cgi?&cmd=retrieve&val=TRACE_NAME='63974791' and TEMPLATE_ID='167000_ABC8_000002114340_A19'&dopt=trace&size=1&seeas=Show	Pseudomonas	160	2e-73	NA18507	ABC	Human_NA18507	ABC8		2005-11-16	ZX	762840	a19	WGA
		174779_ABC12_000046971300_L21	174779_ABC12_000046971300_L21	R	85787358	http://lgt.igs.umaryland.edu/traces/85787358_174779_ABC12_000046971300_L21.html	http://trace.ncbi.nlm.nih.gov/Traces/trace.cgi?&cmd=retrieve&val=TRACE_NAME='85787358' and TEMPLATE_ID='174779_ABC12_000046971300_L21'&dopt=trace&size=1&seeas=Show	Pseudomonas	231	2e-77	NA12878	ABC	Human_NA12878	ABC12		2006-07-02	AH	46421100	l21	WGA
		HDGSP0559	RP11-463H24	F	29178936	http://lgt.igs.umaryland.edu/traces/29178936_HDGSP0559.html	http://trace.ncbi.nlm.nih.gov/Traces/trace.cgi?&cmd=retrieve&val=TRACE_NAME='29178936' and TEMPLATE_ID='HDGSP0559'&dopt=trace&size=1&seeas=Show	Pseudomonas	157	1e-78		BCM	HDGS	HDGSP	405771	2002-05-08	con	HDGSP1D0500
		165728_ABC7_000042504300_J24	165728_ABC7_000042504300_J24	F	60112911	http://lgt.igs.umaryland.edu/traces/60112911_165728_ABC7_000042504300_J24.html	http://trace.ncbi.nlm.nih.gov/Traces/trace.cgi?&cmd=retrieve&val=TRACE_NAME='60112911' and TEMPLATE_ID='165728_ABC7_000042504300_J24'&dopt=trace&size=1&seeas=Show	Pseudomonas	331	0	NA18517	ABC	Human_NA18517	ABC7		2005-09-19	AC	41910200	j24	WGA
		166671_ABC7_000043047300_J18	166671_ABC7_000043047300_J18	R	62206845	http://lgt.igs.umaryland.edu/traces/62206845_166671_ABC7_000043047300_J18.html	http://trace.ncbi.nlm.nih.gov/Traces/trace.cgi?&cmd=retrieve&val=TRACE_NAME='62206845' and TEMPLATE_ID='166671_ABC7_000043047300_J18'&dopt=trace&size=1&seeas=Show	Pseudomonas	185	3e-69	NA18517	ABC	Human_NA18517	ABC7		2005-10-12	ZP	41988400	j18	WGA
		165690_ABC7_000040281200_A4	165690_ABC7_000040281200_A4	R	59927877	http://lgt.igs.umaryland.edu/traces/59927877_165690_ABC7_000040281200_A4.html	http://trace.ncbi.nlm.nih.gov/Traces/trace.cgi?&cmd=retrieve&val=TRACE_NAME='59927877' and TEMPLATE_ID='165690_ABC7_000040281200_A4'&dopt=trace&size=1&seeas=Show	Pseudomonas	123	1e-46	NA18517	ABC	Human_NA18517	ABC7		2005-09-17	ZI	41565600	a4	WGA
		166377_ABC7_000000614522_D6	166377_ABC7_000000614522_D6	R	61992378	http://lgt.igs.umaryland.edu/traces/61992378_166377_ABC7_000000614522_D6.html	http://trace.ncbi.nlm.nih.gov/Traces/trace.cgi?&cmd=retrieve&val=TRACE_NAME='61992378' and TEMPLATE_ID='166377_ABC7_000000614522_D6'&dopt=trace&size=1&seeas=Show	Pseudomonas	193	9e-67	NA18517	ABC	Human_NA18517	ABC7		2005-10-08	AF	538922	d6	WGA
		170143_ABC8_4_1_000041169700_F19	170143_ABC8_4_1_000041169700_F19	R	68455685	http://lgt.igs.umaryland.edu/traces/68455685_170143_ABC8_4_1_000041169700_F19.html	http://trace.ncbi.nlm.nih.gov/Traces/trace.cgi?&cmd=retrieve&val=TRACE_NAME='68455685' and TEMPLATE_ID='170143_ABC8_4_1_000041169700_F19'&dopt=trace&size=1&seeas=Show	Pseudomonas	112	2e-49	NA18507	ABC	Human_NA18507	ABC8_4_1		2006-01-22	ZG	44995200	f19	WGA
		168825_ABC8_4_1_000041134900_B17	168825_ABC8_4_1_000041134900_B17	R	67843801	http://lgt.igs.umaryland.edu/traces/67843801_168825_ABC8_4_1_000041134900_B17.html	http://trace.ncbi.nlm.nih.gov/Traces/trace.cgi?&cmd=retrieve&val=TRACE_NAME='67843801' and TEMPLATE_ID='168825_ABC8_4_1_000041134900_B17'&dopt=trace&size=1&seeas=Show	Pseudomonas	134	2e-67	NA18507	ABC	Human_NA18507	ABC8_4_1		2006-01-13	AF	45693100	b17	WGA
		170143_ABC8_4_1_000041180900_K12	170143_ABC8_4_1_000041180900_K12	F	68655424	http://lgt.igs.umaryland.edu/traces/68655424_170143_ABC8_4_1_000041180900_K12.html	http://trace.ncbi.nlm.nih.gov/Traces/trace.cgi?&cmd=retrieve&val=TRACE_NAME='68655424' and TEMPLATE_ID='170143_ABC8_4_1_000041180900_K12'&dopt=trace&size=1&seeas=Show	Pseudomonas	128	2e-61	NA18507	ABC	Human_NA18507	ABC8_4_1		2006-01-24	ZA	45794600	k12	WGA
		170143_ABC8_4_1_000041198000_N2	170143_ABC8_4_1_000041198000_N2	F	69136185	http://lgt.igs.umaryland.edu/traces/69136185_170143_ABC8_4_1_000041198000_N2.html	http://trace.ncbi.nlm.nih.gov/Traces/trace.cgi?&cmd=retrieve&val=TRACE_NAME='69136185' and TEMPLATE_ID='170143_ABC8_4_1_000041198000_N2'&dopt=trace&size=1&seeas=Show	Pseudomonas	157	4e-81	NA18507	ABC	Human_NA18507	ABC8_4_1		2006-01-30	ZV	45834000	n2	WGA
		170143_ABC8_4_1_000041186900_M13	170143_ABC8_4_1_000041186900_M13	F	68720339	http://lgt.igs.umaryland.edu/traces/68720339_170143_ABC8_4_1_000041186900_M13.html	http://trace.ncbi.nlm.nih.gov/Traces/trace.cgi?&cmd=retrieve&val=TRACE_NAME='68720339' and TEMPLATE_ID='170143_ABC8_4_1_000041186900_M13'&dopt=trace&size=1&seeas=Show	Pseudomonas	368	0	NA18507	ABC	Human_NA18507	ABC8_4_1		2006-01-25	AB	44993700	m13	WGA
		170143_ABC8_4_1_000041184800_J15	170143_ABC8_4_1_000041184800_J15	F	68740897	http://lgt.igs.umaryland.edu/traces/68740897_170143_ABC8_4_1_000041184800_J15.html	http://trace.ncbi.nlm.nih.gov/Traces/trace.cgi?&cmd=retrieve&val=TRACE_NAME='68740897' and TEMPLATE_ID='170143_ABC8_4_1_000041184800_J15'&dopt=trace&size=1&seeas=Show	Pseudomonas	125	5e-62	NA18507	ABC	Human_NA18507	ABC8_4_1		2006-01-25	ZI	45786200	j15	WGA
		168825_ABC8_4_1_000041142700_F4	168825_ABC8_4_1_000041142700_F4	F	67913293	http://lgt.igs.umaryland.edu/traces/67913293_168825_ABC8_4_1_000041142700_F4.html	http://trace.ncbi.nlm.nih.gov/Traces/trace.cgi?&cmd=retrieve&val=TRACE_NAME='67913293' and TEMPLATE_ID='168825_ABC8_4_1_000041142700_F4'&dopt=trace&size=1&seeas=Show	Pseudomonas	147	4e-75	NA18507	ABC	Human_NA18507	ABC8_4_1		2006-01-15	ZU	45677600	f4	WGA
		168825_ABC8_4_1_000045707000_P11	168825_ABC8_4_1_000045707000_P11	R	68310286	http://lgt.igs.umaryland.edu/traces/68310286_168825_ABC8_4_1_000045707000_P11.html	http://trace.ncbi.nlm.nih.gov/Traces/trace.cgi?&cmd=retrieve&val=TRACE_NAME='68310286' and TEMPLATE_ID='168825_ABC8_4_1_000045707000_P11'&dopt=trace&size=1&seeas=Show	Pseudomonas	116	2e-49	NA18507	ABC	Human_NA18507	ABC8_4_1		2006-01-20	ZN	45742300	p11	WGA
		170143_ABC8_4_1_000041182100_P19	170143_ABC8_4_1_000041182100_P19	F	68724278	http://lgt.igs.umaryland.edu/traces/68724278_170143_ABC8_4_1_000041182100_P19.html	http://trace.ncbi.nlm.nih.gov/Traces/trace.cgi?&cmd=retrieve&val=TRACE_NAME='68724278' and TEMPLATE_ID='170143_ABC8_4_1_000041182100_P19'&dopt=trace&size=1&seeas=Show	Pseudomonas	362	0	NA18507	ABC	Human_NA18507	ABC8_4_1		2006-01-25	AE	45804800	p19	WGA
		170143_ABC8_4_1_000043761500_H15	170143_ABC8_4_1_000043761500_H15	F	68349326	http://lgt.igs.umaryland.edu/traces/68349326_170143_ABC8_4_1_000043761500_H15.html	http://trace.ncbi.nlm.nih.gov/Traces/trace.cgi?&cmd=retrieve&val=TRACE_NAME='68349326' and TEMPLATE_ID='170143_ABC8_4_1_000043761500_H15'&dopt=trace&size=1&seeas=Show	Pseudomonas	199	4e-97	NA18507	ABC	Human_NA18507	ABC8_4_1		2006-01-21	AA	45767500	h15	WGA
		168825_ABC8_4_1_000041137200_F22	168825_ABC8_4_1_000041137200_F22	F	67928749	http://lgt.igs.umaryland.edu/traces/67928749_168825_ABC8_4_1_000041137200_F22.html	http://trace.ncbi.nlm.nih.gov/Traces/trace.cgi?&cmd=retrieve&val=TRACE_NAME='67928749' and TEMPLATE_ID='168825_ABC8_4_1_000041137200_F22'&dopt=trace&size=1&seeas=Show	Pseudomonas	262	9e-144	NA18507	ABC	Human_NA18507	ABC8_4_1		2006-01-15	ZG	45693900	f22	WGA
		170143_ABC8_4_1_000041209000_K15	170143_ABC8_4_1_000041209000_K15	F	69220444	http://lgt.igs.umaryland.edu/traces/69220444_170143_ABC8_4_1_000041209000_K15.html	http://trace.ncbi.nlm.nih.gov/Traces/trace.cgi?&cmd=retrieve&val=TRACE_NAME='69220444' and TEMPLATE_ID='170143_ABC8_4_1_000041209000_K15'&dopt=trace&size=1&seeas=Show	Pseudomonas	203	1e-108	NA18507	ABC	Human_NA18507	ABC8_4_1		2006-01-31	ZF	45863400	k15	WGA
		168825_ABC8_4_1_000045707000_K3	168825_ABC8_4_1_000045707000_K3	R	68310152	http://lgt.igs.umaryland.edu/traces/68310152_168825_ABC8_4_1_000045707000_K3.html	http://trace.ncbi.nlm.nih.gov/Traces/trace.cgi?&cmd=retrieve&val=TRACE_NAME='68310152' and TEMPLATE_ID='168825_ABC8_4_1_000045707000_K3'&dopt=trace&size=1&seeas=Show	Pseudomonas	115	3e-51	NA18507	ABC	Human_NA18507	ABC8_4_1		2006-01-20	ZN	45742300	k3	WGA
		172343_ABC9_3_5_000045489700_H3	172343_ABC9_3_5_000045489700_H3	R	75926449	http://lgt.igs.umaryland.edu/traces/75926449_172343_ABC9_3_5_000045489700_H3.html	http://trace.ncbi.nlm.nih.gov/Traces/trace.cgi?&cmd=retrieve&val=TRACE_NAME='75926449' and TEMPLATE_ID='172343_ABC9_3_5_000045489700_H3'&dopt=trace&size=1&seeas=Show	Pseudomonas	206	3e-110	NA18956	ABC	Human_NA18956	ABC9_3_5		2006-04-02	ZN	43379500	h3	WGA
		172343_ABC9_000044016000_B17	172343_ABC9_000044016000_B17	R	75063402	http://lgt.igs.umaryland.edu/traces/75063402_172343_ABC9_000044016000_B17.html	http://trace.ncbi.nlm.nih.gov/Traces/trace.cgi?&cmd=retrieve&val=TRACE_NAME='75063402' and TEMPLATE_ID='172343_ABC9_000044016000_B17'&dopt=trace&size=1&seeas=Show	Pseudomonas	180	7e-95	NA18956	ABC	Human_NA18956	ABC9		2006-03-25	AF	45402300	b17	WGA
		172343_ABC9_3_5_000045431400_A12	172343_ABC9_3_5_000045431400_A12	F	77794751	http://lgt.igs.umaryland.edu/traces/77794751_172343_ABC9_3_5_000045431400_A12.html	http://trace.ncbi.nlm.nih.gov/Traces/trace.cgi?&cmd=retrieve&val=TRACE_NAME='77794751' and TEMPLATE_ID='172343_ABC9_3_5_000045431400_A12'&dopt=trace&size=1&seeas=Show	Pseudomonas	234	8e-120	NA18956	ABC	Human_NA18956	ABC9_3_5		2006-04-20	AB	43652900	b12	WGA
		172343_ABC9_3_5_000045431400_A12	172343_ABC9_3_5_000045431400_A12	R	77795903	http://lgt.igs.umaryland.edu/traces/77795903_172343_ABC9_3_5_000045431400_A12.html	http://trace.ncbi.nlm.nih.gov/Traces/trace.cgi?&cmd=retrieve&val=TRACE_NAME='77795903' and TEMPLATE_ID='172343_ABC9_3_5_000045431400_A12'&dopt=trace&size=1&seeas=Show	Pseudomonas	223	5e-118	NA18956	ABC	Human_NA18956	ABC9_3_5		2006-04-19	AB	43652800	b12	WGA
		172343_ABC9_3_5_000044023900_F17	172343_ABC9_3_5_000044023900_F17	R	75196026	http://lgt.igs.umaryland.edu/traces/75196026_172343_ABC9_3_5_000044023900_F17.html	http://trace.ncbi.nlm.nih.gov/Traces/trace.cgi?&cmd=retrieve&val=TRACE_NAME='75196026' and TEMPLATE_ID='172343_ABC9_3_5_000044023900_F17'&dopt=trace&size=1&seeas=Show	Pseudomonas	525	0	NA18956	ABC	Human_NA18956	ABC9_3_5		2006-03-27	AA	45426500	f17	WGA
		172343_ABC9_3_5_000043985000_A8	172343_ABC9_3_5_000043985000_A8	F	74408728	http://lgt.igs.umaryland.edu/traces/74408728_172343_ABC9_3_5_000043985000_A8.html	http://trace.ncbi.nlm.nih.gov/Traces/trace.cgi?&cmd=retrieve&val=TRACE_NAME='74408728' and TEMPLATE_ID='172343_ABC9_3_5_000043985000_A8'&dopt=trace&size=1&seeas=Show	Pseudomonas	103	1e-46	NA18956	ABC	Human_NA18956	ABC9_3_5		2006-03-20	ZP	45319900	a8	WGA
		172343_ABC9_3_5_000044023300_N23	172343_ABC9_3_5_000044023300_N23	F	75183710	http://lgt.igs.umaryland.edu/traces/75183710_172343_ABC9_3_5_000044023300_N23.html	http://trace.ncbi.nlm.nih.gov/Traces/trace.cgi?&cmd=retrieve&val=TRACE_NAME='75183710' and TEMPLATE_ID='172343_ABC9_3_5_000044023300_N23'&dopt=trace&size=1&seeas=Show	Pseudomonas	220	3e-116	NA18956	ABC	Human_NA18956	ABC9_3_5		2006-03-26	AG	45428300	n23	WGA
		172343_ABC9_3_5_000046272800_J14	172343_ABC9_3_5_000046272800_J14	R	74344284	http://lgt.igs.umaryland.edu/traces/74344284_172343_ABC9_3_5_000046272800_J14.html	http://trace.ncbi.nlm.nih.gov/Traces/trace.cgi?&cmd=retrieve&val=TRACE_NAME='74344284' and TEMPLATE_ID='172343_ABC9_3_5_000046272800_J14'&dopt=trace&size=1&seeas=Show	Pseudomonas	176	2e-92	NA18956	ABC	Human_NA18956	ABC9_3_5		2006-03-19	ZH	45331400	j14	WGA
		172343_ABC9_3_5_000045431400_A12	172343_ABC9_3_5_000045431400_A12	F	75554516	http://lgt.igs.umaryland.edu/traces/75554516_172343_ABC9_3_5_000045431400_A12.html	http://trace.ncbi.nlm.nih.gov/Traces/trace.cgi?&cmd=retrieve&val=TRACE_NAME='75554516' and TEMPLATE_ID='172343_ABC9_3_5_000045431400_A12'&dopt=trace&size=1&seeas=Show	Pseudomonas	230	3e-122	NA18956	ABC	Human_NA18956	ABC9_3_5		2006-03-30	AB	6150049	a12	WGA
		172343_ABC9_3_5_000044001300_D11	172343_ABC9_3_5_000044001300_D11	R	74802407	http://lgt.igs.umaryland.edu/traces/74802407_172343_ABC9_3_5_000044001300_D11.html	http://trace.ncbi.nlm.nih.gov/Traces/trace.cgi?&cmd=retrieve&val=TRACE_NAME='74802407' and TEMPLATE_ID='172343_ABC9_3_5_000044001300_D11'&dopt=trace&size=1&seeas=Show	Pseudomonas	161	4e-81	NA18956	ABC	Human_NA18956	ABC9_3_5		2006-03-23	ZL	45356300	d11	WGA
		172343_ABC9_3_5_000044045600_K4	172343_ABC9_3_5_000044045600_K4	R	75417359	http://lgt.igs.umaryland.edu/traces/75417359_172343_ABC9_3_5_000044045600_K4.html	http://trace.ncbi.nlm.nih.gov/Traces/trace.cgi?&cmd=retrieve&val=TRACE_NAME='75417359' and TEMPLATE_ID='172343_ABC9_3_5_000044045600_K4'&dopt=trace&size=1&seeas=Show	Pseudomonas	180	9e-95	NA18956	ABC	Human_NA18956	ABC9_3_5		2006-03-29	ZN	43301300	k4	WGA
		172343_ABC9_3_5_000045431400_A12	172343_ABC9_3_5_000045431400_A12	F	77169428	http://lgt.igs.umaryland.edu/traces/77169428_172343_ABC9_3_5_000045431400_A12.html	http://trace.ncbi.nlm.nih.gov/Traces/trace.cgi?&cmd=retrieve&val=TRACE_NAME='77169428' and TEMPLATE_ID='172343_ABC9_3_5_000045431400_A12'&dopt=trace&size=1&seeas=Show	Pseudomonas	230	3e-122	NA18956	ABC	Human_NA18956	ABC9_3_5		2006-04-14	AA	43522700	a12	WGA
		171417_ABC10_2_1_000044451500_P4	171417_ABC10_2_1_000044451500_P4	R	77265165	http://lgt.igs.umaryland.edu/traces/77265165_171417_ABC10_2_1_000044451500_P4.html	http://trace.ncbi.nlm.nih.gov/Traces/trace.cgi?&cmd=retrieve&val=TRACE_NAME='77265165' and TEMPLATE_ID='171417_ABC10_2_1_000044451500_P4'&dopt=trace&size=1&seeas=Show	Pseudomonas	210	1e-105	NA19240	ABC	Human_NA19240	ABC10_2_1		2006-04-14	ZC	43536100	p4	WGA
		172343_ABC9_3_5_000044035200_K16	172343_ABC9_3_5_000044035200_K16	F	75448991	http://lgt.igs.umaryland.edu/traces/75448991_172343_ABC9_3_5_000044035200_K16.html	http://trace.ncbi.nlm.nih.gov/Traces/trace.cgi?&cmd=retrieve&val=TRACE_NAME='75448991' and TEMPLATE_ID='172343_ABC9_3_5_000044035200_K16'&dopt=trace&size=1&seeas=Show	Pseudomonas	313	1e-133	NA18956	ABC	Human_NA18956	ABC9_3_5		2006-03-28	ZF	43303200	k16	WGA
		172343_ABC9_3_5_000044027700_L17	172343_ABC9_3_5_000044027700_L17	F	75381783	http://lgt.igs.umaryland.edu/traces/75381783_172343_ABC9_3_5_000044027700_L17.html	http://trace.ncbi.nlm.nih.gov/Traces/trace.cgi?&cmd=retrieve&val=TRACE_NAME='75381783' and TEMPLATE_ID='172343_ABC9_3_5_000044027700_L17'&dopt=trace&size=1&seeas=Show	Pseudomonas	108	8e-52	NA18956	ABC	Human_NA18956	ABC9_3_5		2006-03-28	ZT	45454700	l17	WGA
		172343_ABC9_3_5_000044007300_M19	172343_ABC9_3_5_000044007300_M19	F	74927362	http://lgt.igs.umaryland.edu/traces/74927362_172343_ABC9_3_5_000044007300_M19.html	http://trace.ncbi.nlm.nih.gov/Traces/trace.cgi?&cmd=retrieve&val=TRACE_NAME='74927362' and TEMPLATE_ID='172343_ABC9_3_5_000044007300_M19'&dopt=trace&size=1&seeas=Show	Pseudomonas	225	2e-114	NA18956	ABC	Human_NA18956	ABC9_3_5		2006-03-23	ZL	45368000	m19	WGA
		172343_ABC9_3_5_000043972700_M10	172343_ABC9_3_5_000043972700_M10	F	74202506	http://lgt.igs.umaryland.edu/traces/74202506_172343_ABC9_3_5_000043972700_M10.html	http://trace.ncbi.nlm.nih.gov/Traces/trace.cgi?&cmd=retrieve&val=TRACE_NAME='74202506' and TEMPLATE_ID='172343_ABC9_3_5_000043972700_M10'&dopt=trace&size=1&seeas=Show	Pseudomonas	103	7e-49	NA18956	ABC	Human_NA18956	ABC9_3_5		2006-03-18	ZK	45302500	m10	WGA
		171417_ABC10_2_1_000044462100_P18	171417_ABC10_2_1_000044462100_P18	R	77434357	http://lgt.igs.umaryland.edu/traces/77434357_171417_ABC10_2_1_000044462100_P18.html	http://trace.ncbi.nlm.nih.gov/Traces/trace.cgi?&cmd=retrieve&val=TRACE_NAME='77434357' and TEMPLATE_ID='171417_ABC10_2_1_000044462100_P18'&dopt=trace&size=1&seeas=Show	Pseudomonas	118	2e-55	NA19240	ABC	Human_NA19240	ABC10_2_1		2006-04-16	ZP	43574100	p18	WGA
		172343_ABC9_3_5_000046299600_P8	172343_ABC9_3_5_000046299600_P8	R	74984861	http://lgt.igs.umaryland.edu/traces/74984861_172343_ABC9_3_5_000046299600_P8.html	http://trace.ncbi.nlm.nih.gov/Traces/trace.cgi?&cmd=retrieve&val=TRACE_NAME='74984861' and TEMPLATE_ID='172343_ABC9_3_5_000046299600_P8'&dopt=trace&size=1&seeas=Show	Pseudomonas	112	3e-54	NA18956	ABC	Human_NA18956	ABC9_3_5		2006-03-24	AL	45394300	p8	WGA
		166205_ABC8_000043033400_L20	166205_ABC8_000043033400_L20	R	61792854	http://lgt.igs.umaryland.edu/traces/61792854_166205_ABC8_000043033400_L20.html	http://trace.ncbi.nlm.nih.gov/Traces/trace.cgi?&cmd=retrieve&val=TRACE_NAME='61792854' and TEMPLATE_ID='166205_ABC8_000043033400_L20'&dopt=trace&size=1&seeas=Show	Pseudomonas	385	0	NA18507	ABC	Human_NA18507	ABC8		2005-10-04	ZC	41967800	l20	WGA
		167098_ABC8_000040983400_O21	167098_ABC8_000040983400_O21	F	65516338	http://lgt.igs.umaryland.edu/traces/65516338_167098_ABC8_000040983400_O21.html	http://trace.ncbi.nlm.nih.gov/Traces/trace.cgi?&cmd=retrieve&val=TRACE_NAME='65516338' and TEMPLATE_ID='167098_ABC8_000040983400_O21'&dopt=trace&size=1&seeas=Show	Pseudomonas	403	0	NA18507	ABC	Human_NA18507	ABC8		2005-12-10	AC	43677700	o21	WGA
		168825_ABC8_4_1_000000716122_B7	168825_ABC8_4_1_000000716122_B7	F	66810762	http://lgt.igs.umaryland.edu/traces/66810762_168825_ABC8_4_1_000000716122_B7.html	http://trace.ncbi.nlm.nih.gov/Traces/trace.cgi?&cmd=retrieve&val=TRACE_NAME='66810762' and TEMPLATE_ID='168825_ABC8_4_1_000000716122_B7'&dopt=trace&size=1&seeas=Show	Pseudomonas	183	1e-96	NA18507	ABC	Human_NA18507	ABC8_4_1		2005-12-28	ZY	752122	b7	WGA
		168825_ABC8_4_1_000041103600_G1	168825_ABC8_4_1_000041103600_G1	F	67547716	http://lgt.igs.umaryland.edu/traces/67547716_168825_ABC8_4_1_000041103600_G1.html	http://trace.ncbi.nlm.nih.gov/Traces/trace.cgi?&cmd=retrieve&val=TRACE_NAME='67547716' and TEMPLATE_ID='168825_ABC8_4_1_000041103600_G1'&dopt=trace&size=1&seeas=Show	Pseudomonas	215	6e-111	NA18507	ABC	Human_NA18507	ABC8_4_1		2006-01-09	ZA	40135700	g1	WGA
		168825_ABC8_4_1_000041101400_C8	168825_ABC8_4_1_000041101400_C8	R	67448378	http://lgt.igs.umaryland.edu/traces/67448378_168825_ABC8_4_1_000041101400_C8.html	http://trace.ncbi.nlm.nih.gov/Traces/trace.cgi?&cmd=retrieve&val=TRACE_NAME='67448378' and TEMPLATE_ID='168825_ABC8_4_1_000041101400_C8'&dopt=trace&size=1&seeas=Show	Pseudomonas	160	6e-83	NA18507	ABC	Human_NA18507	ABC8_4_1		2006-01-09	ZV	43723300	c8	WGA
		168825_ABC8_4_1_000041134100_E7	168825_ABC8_4_1_000041134100_E7	R	67849019	http://lgt.igs.umaryland.edu/traces/67849019_168825_ABC8_4_1_000041134100_E7.html	http://trace.ncbi.nlm.nih.gov/Traces/trace.cgi?&cmd=retrieve&val=TRACE_NAME='67849019' and TEMPLATE_ID='168825_ABC8_4_1_000041134100_E7'&dopt=trace&size=1&seeas=Show	Pseudomonas	200	4e-102	NA18507	ABC	Human_NA18507	ABC8_4_1		2006-01-13	ZC	45689300	e7	WGA
		168825_ABC8_4_1_000041101100_F11	168825_ABC8_4_1_000041101100_F11	F	67500422	http://lgt.igs.umaryland.edu/traces/67500422_168825_ABC8_4_1_000041101100_F11.html	http://trace.ncbi.nlm.nih.gov/Traces/trace.cgi?&cmd=retrieve&val=TRACE_NAME='67500422' and TEMPLATE_ID='168825_ABC8_4_1_000041101100_F11'&dopt=trace&size=1&seeas=Show	Pseudomonas	115	1e-53	NA18507	ABC	Human_NA18507	ABC8_4_1		2006-01-08	ZX	43721700	f11	WGA
		168825_ABC8_4_1_000000705122_G22	168825_ABC8_4_1_000000705122_G22	R	66784116	http://lgt.igs.umaryland.edu/traces/66784116_168825_ABC8_4_1_000000705122_G22.html	http://trace.ncbi.nlm.nih.gov/Traces/trace.cgi?&cmd=retrieve&val=TRACE_NAME='66784116' and TEMPLATE_ID='168825_ABC8_4_1_000000705122_G22'&dopt=trace&size=1&seeas=Show	Pseudomonas	138	3e-60	NA18507	ABC	Human_NA18507	ABC8_4_1		2005-12-26	ZQ	729222	g22	WGA
		168825_ABC8_4_1_000000740222_E7	168825_ABC8_4_1_000000740222_E7	F	66869467	http://lgt.igs.umaryland.edu/traces/66869467_168825_ABC8_4_1_000000740222_E7.html	http://trace.ncbi.nlm.nih.gov/Traces/trace.cgi?&cmd=retrieve&val=TRACE_NAME='66869467' and TEMPLATE_ID='168825_ABC8_4_1_000000740222_E7'&dopt=trace&size=1&seeas=Show	Pseudomonas	165	2e-83	NA18507	ABC	Human_NA18507	ABC8_4_1		2005-12-29	AA	770022	e7	WGA
		168825_ABC8_4_1_000000788522_M20	168825_ABC8_4_1_000000788522_M20	R	67030603	http://lgt.igs.umaryland.edu/traces/67030603_168825_ABC8_4_1_000000788522_M20.html	http://trace.ncbi.nlm.nih.gov/Traces/trace.cgi?&cmd=retrieve&val=TRACE_NAME='67030603' and TEMPLATE_ID='168825_ABC8_4_1_000000788522_M20'&dopt=trace&size=1&seeas=Show	Pseudomonas	108	4e-47	NA18507	ABC	Human_NA18507	ABC8_4_1		2005-12-31	ZP	819322	m20	WGA
		168825_ABC8_4_1_000000707322_E15	168825_ABC8_4_1_000000707322_E15	R	66765763	http://lgt.igs.umaryland.edu/traces/66765763_168825_ABC8_4_1_000000707322_E15.html	http://trace.ncbi.nlm.nih.gov/Traces/trace.cgi?&cmd=retrieve&val=TRACE_NAME='66765763' and TEMPLATE_ID='168825_ABC8_4_1_000000707322_E15'&dopt=trace&size=1&seeas=Show	Pseudomonas	238	3e-122	NA18507	ABC	Human_NA18507	ABC8_4_1		2005-12-26	ZL	732422	e15	WGA
		168825_ABC8_4_1_000041085000_J20	168825_ABC8_4_1_000041085000_J20	F	67157429	http://lgt.igs.umaryland.edu/traces/67157429_168825_ABC8_4_1_000041085000_J20.html	http://trace.ncbi.nlm.nih.gov/Traces/trace.cgi?&cmd=retrieve&val=TRACE_NAME='67157429' and TEMPLATE_ID='168825_ABC8_4_1_000041085000_J20'&dopt=trace&size=1&seeas=Show	Pseudomonas	129	5e-62	NA18507	ABC	Human_NA18507	ABC8_4_1		2006-01-03	ZH	42274000	j20	WGA
		168825_ABC8_4_1_000041124300_E12	168825_ABC8_4_1_000041124300_E12	R	67784511	http://lgt.igs.umaryland.edu/traces/67784511_168825_ABC8_4_1_000041124300_E12.html	http://trace.ncbi.nlm.nih.gov/Traces/trace.cgi?&cmd=retrieve&val=TRACE_NAME='67784511' and TEMPLATE_ID='168825_ABC8_4_1_000041124300_E12'&dopt=trace&size=1&seeas=Show	Pseudomonas	154	1e-62	NA18507	ABC	Human_NA18507	ABC8_4_1		2006-01-13	ZL	45672900	e12	WGA
		173650_ABC10_2_1_000043609300_G5	173650_ABC10_2_1_000043609300_G5	F	78199780	http://lgt.igs.umaryland.edu/traces/78199780_173650_ABC10_2_1_000043609300_G5.html	http://trace.ncbi.nlm.nih.gov/Traces/trace.cgi?&cmd=retrieve&val=TRACE_NAME='78199780' and TEMPLATE_ID='173650_ABC10_2_1_000043609300_G5'&dopt=trace&size=1&seeas=Show	Pseudomonas	198	5e-96	NA19240	ABC	Human_NA19240	ABC10_2_1		2006-04-23	ZC	44204800	g5	WGA
		H_HD-1018N14	ABC18-1018N14	R	H_HD-1018N14.g1	http://lgt.igs.umaryland.edu/traces/H_HD-1018N14.g1_H_HD-1018N14.html	http://trace.ncbi.nlm.nih.gov/Traces/trace.cgi?&cmd=retrieve&val=TRACE_NAME='H_HD-1018N14.g1' and TEMPLATE_ID='H_HD-1018N14'&dopt=trace&size=1&seeas=Show	Pseudomonas	191	9e-61		WUGSC	H_HD-08-08-04	2181626703	0j006e	2008-08-03	818	2h08HL	n14	CloneEnd
		HDXJP0328	RP11-321C3	R	HDXJP1E0328A	http://lgt.igs.umaryland.edu/traces/HDXJP1E0328A_HDXJP0328.html	http://trace.ncbi.nlm.nih.gov/Traces/trace.cgi?&cmd=retrieve&val=TRACE_NAME='HDXJP1E0328A' and TEMPLATE_ID='HDXJP0328'&dopt=trace&size=1&seeas=Show	Pseudomonas	119	1e-41		BCM	HDXJ		346397	2002-03-04	ice	HDXJP1E0300
		22SNP17119-107a15		R	22SNP17119-107a15.q1k	http://lgt.igs.umaryland.edu/traces/22SNP17119-107a15.q1k_22SNP17119-107a15.html	http://trace.ncbi.nlm.nih.gov/Traces/trace.cgi?&cmd=retrieve&val=TRACE_NAME='22SNP17119-107a15.q1k' and TEMPLATE_ID='22SNP17119-107a15'&dopt=trace&size=1&seeas=Show	Pseudomonas	366	0	NA17119	SC	Chr_22_17119	60797		2003-05-06		22SNP17119-107	a15	SNP
		ABC8_000043027000_B3	ABC8_000043027000_B3	R	61742717	http://lgt.igs.umaryland.edu/traces/61742717_ABC8_000043027000_B3.html	http://trace.ncbi.nlm.nih.gov/Traces/trace.cgi?&cmd=retrieve&val=TRACE_NAME='61742717' and TEMPLATE_ID='ABC8_000043027000_B3'&dopt=trace&size=1&seeas=Show	Pseudomonas	122	7e-58	NA18507	ABC	Human_NA18507	ABC8		2005-10-04	ZU	41944300	b3	WGA
		165807_ABC8_000005713649_B8	165807_ABC8_000005713649_B8	R	60610158	http://lgt.igs.umaryland.edu/traces/60610158_165807_ABC8_000005713649_B8.html	http://trace.ncbi.nlm.nih.gov/Traces/trace.cgi?&cmd=retrieve&val=TRACE_NAME='60610158' and TEMPLATE_ID='165807_ABC8_000005713649_B8'&dopt=trace&size=1&seeas=Show	Pseudomonas	236	3e-128	NA18507	ABC	Human_NA18507	ABC8		2005-09-24	ZY	5751549	b8	WGA
		165972_ABC8_000042998700_N4	165972_ABC8_000042998700_N4	F	61444887	http://lgt.igs.umaryland.edu/traces/61444887_165972_ABC8_000042998700_N4.html	http://trace.ncbi.nlm.nih.gov/Traces/trace.cgi?&cmd=retrieve&val=TRACE_NAME='61444887' and TEMPLATE_ID='165972_ABC8_000042998700_N4'&dopt=trace&size=1&seeas=Show	Pseudomonas	194	7e-89	NA18507	ABC	Human_NA18507	ABC8		2005-09-30	ZX	42615600	n4	WGA
		166941_ABC7_000043085300_K15	166941_ABC7_000043085300_K15	F	62672436	http://lgt.igs.umaryland.edu/traces/62672436_166941_ABC7_000043085300_K15.html	http://trace.ncbi.nlm.nih.gov/Traces/trace.cgi?&cmd=retrieve&val=TRACE_NAME='62672436' and TEMPLATE_ID='166941_ABC7_000043085300_K15'&dopt=trace&size=1&seeas=Show	Pseudomonas	191	1e-65	NA18517	ABC	Human_NA18517	ABC7		2005-10-21	AC	42019200	k15	WGA
		166540_ABC7_000000623622_C16	166540_ABC7_000000623622_C16	R	62127700	http://lgt.igs.umaryland.edu/traces/62127700_166540_ABC7_000000623622_C16.html	http://trace.ncbi.nlm.nih.gov/Traces/trace.cgi?&cmd=retrieve&val=TRACE_NAME='62127700' and TEMPLATE_ID='166540_ABC7_000000623622_C16'&dopt=trace&size=1&seeas=Show	Pseudomonas	220	3e-54	NA18517	ABC	Human_NA18517	ABC7		2005-10-10	ZT	571522	c16	WGA
		165936_ABC8_000040299000_O17	165936_ABC8_000040299000_O17	R	61320706	http://lgt.igs.umaryland.edu/traces/61320706_165936_ABC8_000040299000_O17.html	http://trace.ncbi.nlm.nih.gov/Traces/trace.cgi?&cmd=retrieve&val=TRACE_NAME='61320706' and TEMPLATE_ID='165936_ABC8_000040299000_O17'&dopt=trace&size=1&seeas=Show	Pseudomonas	213	2e-114	NA18507	ABC	Human_NA18507	ABC8		2005-09-28	ZD	42577200	o17	WGA
		166540_ABC7_000000619822_D12	166540_ABC7_000000619822_D12	R	62131478	http://lgt.igs.umaryland.edu/traces/62131478_166540_ABC7_000000619822_D12.html	http://trace.ncbi.nlm.nih.gov/Traces/trace.cgi?&cmd=retrieve&val=TRACE_NAME='62131478' and TEMPLATE_ID='166540_ABC7_000000619822_D12'&dopt=trace&size=1&seeas=Show	Pseudomonas	117	1e-47	NA18517	ABC	Human_NA18517	ABC7		2005-10-10	ZY	575322	d12	WGA
		165889_ABC8_000040290200_P5	165889_ABC8_000040290200_P5	R	60863281	http://lgt.igs.umaryland.edu/traces/60863281_165889_ABC8_000040290200_P5.html	http://trace.ncbi.nlm.nih.gov/Traces/trace.cgi?&cmd=retrieve&val=TRACE_NAME='60863281' and TEMPLATE_ID='165889_ABC8_000040290200_P5'&dopt=trace&size=1&seeas=Show	Pseudomonas	179	9e-92	NA18507	ABC	Human_NA18507	ABC8		2005-09-25	ZY	41952200	p5	WGA
		166692_ABC7_000042759600_D15	166692_ABC7_000042759600_D15	F	62802310	http://lgt.igs.umaryland.edu/traces/62802310_166692_ABC7_000042759600_D15.html	http://trace.ncbi.nlm.nih.gov/Traces/trace.cgi?&cmd=retrieve&val=TRACE_NAME='62802310' and TEMPLATE_ID='166692_ABC7_000042759600_D15'&dopt=trace&size=1&seeas=Show	Pseudomonas	187	4e-56	NA18517	ABC	Human_NA18517	ABC7		2005-10-24	ZV	43103900	d15	WGA
		166540_ABC7_000000618922_F5	166540_ABC7_000000618922_F5	F	62130601	http://lgt.igs.umaryland.edu/traces/62130601_166540_ABC7_000000618922_F5.html	http://trace.ncbi.nlm.nih.gov/Traces/trace.cgi?&cmd=retrieve&val=TRACE_NAME='62130601' and TEMPLATE_ID='166540_ABC7_000000618922_F5'&dopt=trace&size=1&seeas=Show	Pseudomonas	173	1e-59	NA18517	ABC	Human_NA18517	ABC7		2005-10-10	ZR	570622	f5	WGA
		166640_ABC7_000042756600_G17	166640_ABC7_000042756600_G17	R	62748332	http://lgt.igs.umaryland.edu/traces/62748332_166640_ABC7_000042756600_G17.html	http://trace.ncbi.nlm.nih.gov/Traces/trace.cgi?&cmd=retrieve&val=TRACE_NAME='62748332' and TEMPLATE_ID='166640_ABC7_000042756600_G17'&dopt=trace&size=1&seeas=Show	Pseudomonas	286	4e-158	NA18517	ABC	Human_NA18517	ABC7		2005-10-23	ZP	42793900	g17	WGA
		166640_ABC7_000042757800_E11	166640_ABC7_000042757800_E11	F	62732779	http://lgt.igs.umaryland.edu/traces/62732779_166640_ABC7_000042757800_E11.html	http://trace.ncbi.nlm.nih.gov/Traces/trace.cgi?&cmd=retrieve&val=TRACE_NAME='62732779' and TEMPLATE_ID='166640_ABC7_000042757800_E11'&dopt=trace&size=1&seeas=Show	Pseudomonas	126	4e-41	NA18517	ABC	Human_NA18517	ABC7		2005-10-23	ZU	42795300	e11	WGA
		170215_ABC9_3_2_000045919500_I14	170215_ABC9_3_2_000045919500_I14	F	70802311	http://lgt.igs.umaryland.edu/traces/70802311_170215_ABC9_3_2_000045919500_I14.html	http://trace.ncbi.nlm.nih.gov/Traces/trace.cgi?&cmd=retrieve&val=TRACE_NAME='70802311' and TEMPLATE_ID='170215_ABC9_3_2_000045919500_I14'&dopt=trace&size=1&seeas=Show	Pseudomonas	185	3e-85	NA18956	ABC	Human_NA18956	ABC9_3_2		2006-02-15	ZU	45124600	i14	WGA
		170215_ABC9_3_2_000041239500_G15	170215_ABC9_3_2_000041239500_G15	F	70178112	http://lgt.igs.umaryland.edu/traces/70178112_170215_ABC9_3_2_000041239500_G15.html	http://trace.ncbi.nlm.nih.gov/Traces/trace.cgi?&cmd=retrieve&val=TRACE_NAME='70178112' and TEMPLATE_ID='170215_ABC9_3_2_000041239500_G15'&dopt=trace&size=1&seeas=Show	Pseudomonas	169	3e-88	NA18956	ABC	Human_NA18956	ABC9_3_2		2006-02-09	ZT	45052600	g15	WGA
		170215_ABC9_3_2_000043817700_K17	170215_ABC9_3_2_000043817700_K17	R	71090686	http://lgt.igs.umaryland.edu/traces/71090686_170215_ABC9_3_2_000043817700_K17.html	http://trace.ncbi.nlm.nih.gov/Traces/trace.cgi?&cmd=retrieve&val=TRACE_NAME='71090686' and TEMPLATE_ID='170215_ABC9_3_2_000043817700_K17'&dopt=trace&size=1&seeas=Show	Pseudomonas	159	6e-80	NA18956	ABC	Human_NA18956	ABC9_3_2		2006-02-17	ZN	45152500	k17	WGA
		170215_ABC9_3_2_000043836800_H19	170215_ABC9_3_2_000043836800_H19	F	71316368	http://lgt.igs.umaryland.edu/traces/71316368_170215_ABC9_3_2_000043836800_H19.html	http://trace.ncbi.nlm.nih.gov/Traces/trace.cgi?&cmd=retrieve&val=TRACE_NAME='71316368' and TEMPLATE_ID='170215_ABC9_3_2_000043836800_H19'&dopt=trace&size=1&seeas=Show	Pseudomonas	121	1e-59	NA18956	ABC	Human_NA18956	ABC9_3_2		2006-02-21	ZH	45987100	h19	WGA
		170215_ABC9_3_2_000043821200_O16	170215_ABC9_3_2_000043821200_O16	R	71065820	http://lgt.igs.umaryland.edu/traces/71065820_170215_ABC9_3_2_000043821200_O16.html	http://trace.ncbi.nlm.nih.gov/Traces/trace.cgi?&cmd=retrieve&val=TRACE_NAME='71065820' and TEMPLATE_ID='170215_ABC9_3_2_000043821200_O16'&dopt=trace&size=1&seeas=Show	Pseudomonas	344	0	NA18956	ABC	Human_NA18956	ABC9_3_2		2006-02-18	ZP	45143300	o16	WGA
		169794_ABC9_2_1_000000558414_L22	169794_ABC9_2_1_000000558414_L22	R	68117694	http://lgt.igs.umaryland.edu/traces/68117694_169794_ABC9_2_1_000000558414_L22.html	http://trace.ncbi.nlm.nih.gov/Traces/trace.cgi?&cmd=retrieve&val=TRACE_NAME='68117694' and TEMPLATE_ID='169794_ABC9_2_1_000000558414_L22'&dopt=trace&size=1&seeas=Show	Pseudomonas	173	1e-90	NA18956	ABC	Human_NA18956	ABC9_2_1		2006-01-17	ZG	559614	l22	WGA
		170215_ABC9_3_2_000043853300_N19	170215_ABC9_3_2_000043853300_N19	R	71523917	http://lgt.igs.umaryland.edu/traces/71523917_170215_ABC9_3_2_000043853300_N19.html	http://trace.ncbi.nlm.nih.gov/Traces/trace.cgi?&cmd=retrieve&val=TRACE_NAME='71523917' and TEMPLATE_ID='170215_ABC9_3_2_000043853300_N19'&dopt=trace&size=1&seeas=Show	Pseudomonas	253	1e-133	NA18956	ABC	Human_NA18956	ABC9_3_2		2006-02-23	AG	45206900	n19	WGA
		170213_ABC9_3_1_000000654805_P15	170213_ABC9_3_1_000000654805_P15	F	68894174	http://lgt.igs.umaryland.edu/traces/68894174_170213_ABC9_3_1_000000654805_P15.html	http://trace.ncbi.nlm.nih.gov/Traces/trace.cgi?&cmd=retrieve&val=TRACE_NAME='68894174' and TEMPLATE_ID='170213_ABC9_3_1_000000654805_P15'&dopt=trace&size=1&seeas=Show	Pseudomonas	129	2e-64	NA18956	ABC	Human_NA18956	ABC9_3_1		2006-01-27	ZK	656405	p15	WGA
		170215_ABC9_3_2_000043864100_K24	170215_ABC9_3_2_000043864100_K24	F	71641886	http://lgt.igs.umaryland.edu/traces/71641886_170215_ABC9_3_2_000043864100_K24.html	http://trace.ncbi.nlm.nih.gov/Traces/trace.cgi?&cmd=retrieve&val=TRACE_NAME='71641886' and TEMPLATE_ID='170215_ABC9_3_2_000043864100_K24'&dopt=trace&size=1&seeas=Show	Pseudomonas	115	1e-46	NA18956	ABC	Human_NA18956	ABC9_3_2		2006-02-24	ZG	45212100	k24	WGA
		170215_ABC9_3_2_000043841200_M20	170215_ABC9_3_2_000043841200_M20	F	71379821	http://lgt.igs.umaryland.edu/traces/71379821_170215_ABC9_3_2_000043841200_M20.html	http://trace.ncbi.nlm.nih.gov/Traces/trace.cgi?&cmd=retrieve&val=TRACE_NAME='71379821' and TEMPLATE_ID='170215_ABC9_3_2_000043841200_M20'&dopt=trace&size=1&seeas=Show	Pseudomonas	156	9e-76	NA18956	ABC	Human_NA18956	ABC9_3_2		2006-02-21	ZF	45958000	m20	WGA
		170215_ABC9_3_2_000043880400_G7	170215_ABC9_3_2_000043880400_G7	F	72041696	http://lgt.igs.umaryland.edu/traces/72041696_170215_ABC9_3_2_000043880400_G7.html	http://trace.ncbi.nlm.nih.gov/Traces/trace.cgi?&cmd=retrieve&val=TRACE_NAME='72041696' and TEMPLATE_ID='170215_ABC9_3_2_000043880400_G7'&dopt=trace&size=1&seeas=Show	Pseudomonas	117	3e-57	NA18956	ABC	Human_NA18956	ABC9_3_2		2006-02-27	ZC	46031100	g7	WGA
		170215_ABC9_3_2_000041243000_P13	170215_ABC9_3_2_000041243000_P13	F	70166500	http://lgt.igs.umaryland.edu/traces/70166500_170215_ABC9_3_2_000041243000_P13.html	http://trace.ncbi.nlm.nih.gov/Traces/trace.cgi?&cmd=retrieve&val=TRACE_NAME='70166500' and TEMPLATE_ID='170215_ABC9_3_2_000041243000_P13'&dopt=trace&size=1&seeas=Show	Pseudomonas	135	3e-63	NA18956	ABC	Human_NA18956	ABC9_3_2		2006-02-09	AF	45046500	p13	WGA
		170215_ABC9_3_2_000041289200_N2	170215_ABC9_3_2_000041289200_N2	R	70757525	http://lgt.igs.umaryland.edu/traces/70757525_170215_ABC9_3_2_000041289200_N2.html	http://trace.ncbi.nlm.nih.gov/Traces/trace.cgi?&cmd=retrieve&val=TRACE_NAME='70757525' and TEMPLATE_ID='170215_ABC9_3_2_000041289200_N2'&dopt=trace&size=1&seeas=Show	Pseudomonas	162	4e-84	NA18956	ABC	Human_NA18956	ABC9_3_2		2006-02-15	ZD	45121800	n2	WGA
		170215_ABC9_3_2_000043874200_I24	170215_ABC9_3_2_000043874200_I24	R	71688831	http://lgt.igs.umaryland.edu/traces/71688831_170215_ABC9_3_2_000043874200_I24.html	http://trace.ncbi.nlm.nih.gov/Traces/trace.cgi?&cmd=retrieve&val=TRACE_NAME='71688831' and TEMPLATE_ID='170215_ABC9_3_2_000043874200_I24'&dopt=trace&size=1&seeas=Show	Pseudomonas	129	3e-57	NA18956	ABC	Human_NA18956	ABC9_3_2		2006-02-24	ZR	45236100	i24	WGA
		170215_ABC9_3_2_000043858200_H18	170215_ABC9_3_2_000043858200_H18	F	71563576	http://lgt.igs.umaryland.edu/traces/71563576_170215_ABC9_3_2_000043858200_H18.html	http://trace.ncbi.nlm.nih.gov/Traces/trace.cgi?&cmd=retrieve&val=TRACE_NAME='71563576' and TEMPLATE_ID='170215_ABC9_3_2_000043858200_H18'&dopt=trace&size=1&seeas=Show	Pseudomonas	190	8e-101	NA18956	ABC	Human_NA18956	ABC9_3_2		2006-02-23	ZJ	45210600	h18	WGA
		170215_ABC9_3_2_000043814200_E6	170215_ABC9_3_2_000043814200_E6	F	71008310	http://lgt.igs.umaryland.edu/traces/71008310_170215_ABC9_3_2_000043814200_E6.html	http://trace.ncbi.nlm.nih.gov/Traces/trace.cgi?&cmd=retrieve&val=TRACE_NAME='71008310' and TEMPLATE_ID='170215_ABC9_3_2_000043814200_E6'&dopt=trace&size=1&seeas=Show	Pseudomonas	157	2e-71	NA18956	ABC	Human_NA18956	ABC9_3_2		2006-02-16	ZX	45137600	e6	WGA
		170215_ABC9_3_2_000041257900_J20	170215_ABC9_3_2_000041257900_J20	F	70421153	http://lgt.igs.umaryland.edu/traces/70421153_170215_ABC9_3_2_000041257900_J20.html	http://trace.ncbi.nlm.nih.gov/Traces/trace.cgi?&cmd=retrieve&val=TRACE_NAME='70421153' and TEMPLATE_ID='170215_ABC9_3_2_000041257900_J20'&dopt=trace&size=1&seeas=Show	Pseudomonas	139	2e-70	NA18956	ABC	Human_NA18956	ABC9_3_2		2006-02-12	ZX	45072000	j20	WGA
		170215_ABC9_3_2_000041250000_M7	170215_ABC9_3_2_000041250000_M7	F	70253213	http://lgt.igs.umaryland.edu/traces/70253213_170215_ABC9_3_2_000041250000_M7.html	http://trace.ncbi.nlm.nih.gov/Traces/trace.cgi?&cmd=retrieve&val=TRACE_NAME='70253213' and TEMPLATE_ID='170215_ABC9_3_2_000041250000_M7'&dopt=trace&size=1&seeas=Show	Pseudomonas	125	5e-62	NA18956	ABC	Human_NA18956	ABC9_3_2		2006-02-09	ZF	45072800	m7	WGA
		170143_ABC8_4_1_000041212300_C22	170143_ABC8_4_1_000041212300_C22	F	69393061	http://lgt.igs.umaryland.edu/traces/69393061_170143_ABC8_4_1_000041212300_C22.html	http://trace.ncbi.nlm.nih.gov/Traces/trace.cgi?&cmd=retrieve&val=TRACE_NAME='69393061' and TEMPLATE_ID='170143_ABC8_4_1_000041212300_C22'&dopt=trace&size=1&seeas=Show	Pseudomonas	105	5e-50	NA18507	ABC	Human_NA18507	ABC8_4_1		2006-02-02	ZY	45875200	c22	WGA
		170215_ABC9_3_2_000043835800_B21	170215_ABC9_3_2_000043835800_B21	F	71236842	http://lgt.igs.umaryland.edu/traces/71236842_170215_ABC9_3_2_000043835800_B21.html	http://trace.ncbi.nlm.nih.gov/Traces/trace.cgi?&cmd=retrieve&val=TRACE_NAME='71236842' and TEMPLATE_ID='170215_ABC9_3_2_000043835800_B21'&dopt=trace&size=1&seeas=Show	Pseudomonas	200	1e-99	NA18956	ABC	Human_NA18956	ABC9_3_2		2006-02-20	ZF	45951000	b21	WGA
		170215_ABC9_3_2_000043867200_J10	170215_ABC9_3_2_000043867200_J10	R	71620055	http://lgt.igs.umaryland.edu/traces/71620055_170215_ABC9_3_2_000043867200_J10.html	http://trace.ncbi.nlm.nih.gov/Traces/trace.cgi?&cmd=retrieve&val=TRACE_NAME='71620055' and TEMPLATE_ID='170215_ABC9_3_2_000043867200_J10'&dopt=trace&size=1&seeas=Show	Pseudomonas	113	9e-55	NA18956	ABC	Human_NA18956	ABC9_3_2		2006-02-24	ZR	45165800	j10	WGA
		170213_ABC9_3_1_000000654805_G2	170213_ABC9_3_1_000000654805_G2	R	68901540	http://lgt.igs.umaryland.edu/traces/68901540_170213_ABC9_3_1_000000654805_G2.html	http://trace.ncbi.nlm.nih.gov/Traces/trace.cgi?&cmd=retrieve&val=TRACE_NAME='68901540' and TEMPLATE_ID='170213_ABC9_3_1_000000654805_G2'&dopt=trace&size=1&seeas=Show	Pseudomonas	172	4e-90	NA18956	ABC	Human_NA18956	ABC9_3_1		2006-01-27	ZB	656505	g2	WGA
		170215_ABC9_3_2_000041279800_D4	170215_ABC9_3_2_000041279800_D4	F	70551698	http://lgt.igs.umaryland.edu/traces/70551698_170215_ABC9_3_2_000041279800_D4.html	http://trace.ncbi.nlm.nih.gov/Traces/trace.cgi?&cmd=retrieve&val=TRACE_NAME='70551698' and TEMPLATE_ID='170215_ABC9_3_2_000041279800_D4'&dopt=trace&size=1&seeas=Show	Pseudomonas	117	3e-57	NA18956	ABC	Human_NA18956	ABC9_3_2		2006-02-13	ZE	45101300	d4	WGA
		169793_ABC9_1_3_000000703968_K3	169793_ABC9_1_3_000000703968_K3	F	69304037	http://lgt.igs.umaryland.edu/traces/69304037_169793_ABC9_1_3_000000703968_K3.html	http://trace.ncbi.nlm.nih.gov/Traces/trace.cgi?&cmd=retrieve&val=TRACE_NAME='69304037' and TEMPLATE_ID='169793_ABC9_1_3_000000703968_K3'&dopt=trace&size=1&seeas=Show	Pseudomonas	213	9e-110	NA18956	ABC	Human_NA18956	ABC9_1_3		2006-02-01	ZK	704568	k3	WGA
		170143_ABC8_4_1_000041200800_J20	170143_ABC8_4_1_000041200800_J20	R	69229357	http://lgt.igs.umaryland.edu/traces/69229357_170143_ABC8_4_1_000041200800_J20.html	http://trace.ncbi.nlm.nih.gov/Traces/trace.cgi?&cmd=retrieve&val=TRACE_NAME='69229357' and TEMPLATE_ID='170143_ABC8_4_1_000041200800_J20'&dopt=trace&size=1&seeas=Show	Pseudomonas	190	8e-101	NA18507	ABC	Human_NA18507	ABC8_4_1		2006-01-31	ZK	45856200	j20	WGA
		170213_ABC9_3_1_000000654805_B20	170213_ABC9_3_1_000000654805_B20	F	68894241	http://lgt.igs.umaryland.edu/traces/68894241_170213_ABC9_3_1_000000654805_B20.html	http://trace.ncbi.nlm.nih.gov/Traces/trace.cgi?&cmd=retrieve&val=TRACE_NAME='68894241' and TEMPLATE_ID='170213_ABC9_3_1_000000654805_B20'&dopt=trace&size=1&seeas=Show	Pseudomonas	113	7e-55	NA18956	ABC	Human_NA18956	ABC9_3_1		2006-01-27	ZK	656405	b20	WGA
		170215_ABC9_3_2_000041277300_C18	170215_ABC9_3_2_000041277300_C18	F	70487802	http://lgt.igs.umaryland.edu/traces/70487802_170215_ABC9_3_2_000041277300_C18.html	http://trace.ncbi.nlm.nih.gov/Traces/trace.cgi?&cmd=retrieve&val=TRACE_NAME='70487802' and TEMPLATE_ID='170215_ABC9_3_2_000041277300_C18'&dopt=trace&size=1&seeas=Show	Pseudomonas	248	1e-130	NA18956	ABC	Human_NA18956	ABC9_3_2		2006-02-12	ZD	45102300	c18	WGA
		170215_ABC9_3_2_000043813300_K24	170215_ABC9_3_2_000043813300_K24	F	70965950	http://lgt.igs.umaryland.edu/traces/70965950_170215_ABC9_3_2_000043813300_K24.html	http://trace.ncbi.nlm.nih.gov/Traces/trace.cgi?&cmd=retrieve&val=TRACE_NAME='70965950' and TEMPLATE_ID='170215_ABC9_3_2_000043813300_K24'&dopt=trace&size=1&seeas=Show	Pseudomonas	176	6e-83	NA18956	ABC	Human_NA18956	ABC9_3_2		2006-02-18	AB	45138000	k24	WGA
		170215_ABC9_3_2_000041280100_P3	170215_ABC9_3_2_000041280100_P3	F	70550161	http://lgt.igs.umaryland.edu/traces/70550161_170215_ABC9_3_2_000041280100_P3.html	http://trace.ncbi.nlm.nih.gov/Traces/trace.cgi?&cmd=retrieve&val=TRACE_NAME='70550161' and TEMPLATE_ID='170215_ABC9_3_2_000041280100_P3'&dopt=trace&size=1&seeas=Show	Pseudomonas	462	0	NA18956	ABC	Human_NA18956	ABC9_3_2		2006-02-12	ZP	45102600	p3	WGA
		170215_ABC9_3_2_000041267700_J23	170215_ABC9_3_2_000041267700_J23	R	70464735	http://lgt.igs.umaryland.edu/traces/70464735_170215_ABC9_3_2_000041267700_J23.html	http://trace.ncbi.nlm.nih.gov/Traces/trace.cgi?&cmd=retrieve&val=TRACE_NAME='70464735' and TEMPLATE_ID='170215_ABC9_3_2_000041267700_J23'&dopt=trace&size=1&seeas=Show	Pseudomonas	230	6e-120	NA18956	ABC	Human_NA18956	ABC9_3_2		2006-02-12	ZJ	45087000	j23	WGA
		170215_ABC9_3_2_000041283000_D23	170215_ABC9_3_2_000041283000_D23	R	70683138	http://lgt.igs.umaryland.edu/traces/70683138_170215_ABC9_3_2_000041283000_D23.html	http://trace.ncbi.nlm.nih.gov/Traces/trace.cgi?&cmd=retrieve&val=TRACE_NAME='70683138' and TEMPLATE_ID='170215_ABC9_3_2_000041283000_D23'&dopt=trace&size=1&seeas=Show	Pseudomonas	236	2e-123	NA18956	ABC	Human_NA18956	ABC9_3_2		2006-02-14	ZX	45108200	d23	WGA
		170215_ABC9_3_2_000043835700_N17	170215_ABC9_3_2_000043835700_N17	R	71252437	http://lgt.igs.umaryland.edu/traces/71252437_170215_ABC9_3_2_000043835700_N17.html	http://trace.ncbi.nlm.nih.gov/Traces/trace.cgi?&cmd=retrieve&val=TRACE_NAME='71252437' and TEMPLATE_ID='170215_ABC9_3_2_000043835700_N17'&dopt=trace&size=1&seeas=Show	Pseudomonas	106	4e-41	NA18956	ABC	Human_NA18956	ABC9_3_2		2006-02-20	ZK	45942000	n17	WGA
		170215_ABC9_3_2_000043848500_A9	170215_ABC9_3_2_000043848500_A9	F	71389467	http://lgt.igs.umaryland.edu/traces/71389467_170215_ABC9_3_2_000043848500_A9.html	http://trace.ncbi.nlm.nih.gov/Traces/trace.cgi?&cmd=retrieve&val=TRACE_NAME='71389467' and TEMPLATE_ID='170215_ABC9_3_2_000043848500_A9'&dopt=trace&size=1&seeas=Show	Pseudomonas	161	2e-83	NA18956	ABC	Human_NA18956	ABC9_3_2		2006-02-21	AD	45958500	a9	WGA
		170215_ABC9_3_2_000045924800_K4	170215_ABC9_3_2_000045924800_K4	F	71003662	http://lgt.igs.umaryland.edu/traces/71003662_170215_ABC9_3_2_000045924800_K4.html	http://trace.ncbi.nlm.nih.gov/Traces/trace.cgi?&cmd=retrieve&val=TRACE_NAME='71003662' and TEMPLATE_ID='170215_ABC9_3_2_000045924800_K4'&dopt=trace&size=1&seeas=Show	Pseudomonas	105	3e-45	NA18956	ABC	Human_NA18956	ABC9_3_2		2006-02-17	ZY	45132100	k4	WGA
		170215_ABC9_3_2_000041241700_A4	170215_ABC9_3_2_000041241700_A4	R	70154547	http://lgt.igs.umaryland.edu/traces/70154547_170215_ABC9_3_2_000041241700_A4.html	http://trace.ncbi.nlm.nih.gov/Traces/trace.cgi?&cmd=retrieve&val=TRACE_NAME='70154547' and TEMPLATE_ID='170215_ABC9_3_2_000041241700_A4'&dopt=trace&size=1&seeas=Show	Pseudomonas	203	1e-108	NA18956	ABC	Human_NA18956	ABC9_3_2		2006-02-09	ZG	45057600	a4	WGA
		170215_ABC9_3_2_000043876400_C5	170215_ABC9_3_2_000043876400_C5	R	71716074	http://lgt.igs.umaryland.edu/traces/71716074_170215_ABC9_3_2_000043876400_C5.html	http://trace.ncbi.nlm.nih.gov/Traces/trace.cgi?&cmd=retrieve&val=TRACE_NAME='71716074' and TEMPLATE_ID='170215_ABC9_3_2_000043876400_C5'&dopt=trace&size=1&seeas=Show	Pseudomonas	188	1e-99	NA18956	ABC	Human_NA18956	ABC9_3_2		2006-02-25	ZL	45234000	c5	WGA
		pd13_5388		F	pd13_5388.z1	http://lgt.igs.umaryland.edu/traces/pd13_5388.z1_pd13_5388.html	http://trace.ncbi.nlm.nih.gov/Traces/trace.cgi?&cmd=retrieve&val=TRACE_NAME='pd13_5388.z1' and TEMPLATE_ID='pd13_5388'&dopt=trace&size=1&seeas=Show	Pseudomonas	142	2e-55		BGI						pd13_5300	88
		163460_ABC7_000040595300_K13	ABC7_000040595300_K13	F	55073930	http://lgt.igs.umaryland.edu/traces/55073930_163460_ABC7_000040595300_K13.html	http://trace.ncbi.nlm.nih.gov/Traces/trace.cgi?&cmd=retrieve&val=TRACE_NAME='55073930' and TEMPLATE_ID='163460_ABC7_000040595300_K13'&dopt=trace&size=1&seeas=Show	Pseudomonas	240	2e-52	NA18517	ABC	Human_NA18517	ABC7		2005-06-23	ZS	41719400	k13	WGA
		163285_ABC7_000041757600_E1	ABC7_000041757600_E1	F	56336056	http://lgt.igs.umaryland.edu/traces/56336056_163285_ABC7_000041757600_E1.html	http://trace.ncbi.nlm.nih.gov/Traces/trace.cgi?&cmd=retrieve&val=TRACE_NAME='56336056' and TEMPLATE_ID='163285_ABC7_000041757600_E1'&dopt=trace&size=1&seeas=Show	Pseudomonas	148	5e-76	NA18517	ABC	Human_NA18517	ABC7		2005-08-01	ZU	41817500	e1	WGA
		165431_ABC7_000042407000_H11	165431_ABC7_000042407000_H11	R	59010592	http://lgt.igs.umaryland.edu/traces/59010592_165431_ABC7_000042407000_H11.html	http://trace.ncbi.nlm.nih.gov/Traces/trace.cgi?&cmd=retrieve&val=TRACE_NAME='59010592' and TEMPLATE_ID='165431_ABC7_000042407000_H11'&dopt=trace&size=1&seeas=Show	Pseudomonas	405	6e-117	NA18517	ABC	Human_NA18517	ABC7		2005-09-06	ZQ	41859200	h11	WGA
		165431_ABC7_000042412200_G10	165431_ABC7_000042412200_G10	R	59000206	http://lgt.igs.umaryland.edu/traces/59000206_165431_ABC7_000042412200_G10.html	http://trace.ncbi.nlm.nih.gov/Traces/trace.cgi?&cmd=retrieve&val=TRACE_NAME='59000206' and TEMPLATE_ID='165431_ABC7_000042412200_G10'&dopt=trace&size=1&seeas=Show	Pseudomonas	118	5e-58	NA18517	ABC	Human_NA18517	ABC7		2005-09-05	AF	41866100	g10	WGA
		HDLJP0236A	RP11-282K24	F	HDLJP1D0236A	http://lgt.igs.umaryland.edu/traces/HDLJP1D0236A_HDLJP0236A.html	http://trace.ncbi.nlm.nih.gov/Traces/trace.cgi?&cmd=retrieve&val=TRACE_NAME='HDLJP1D0236A' and TEMPLATE_ID='HDLJP0236A'&dopt=trace&size=1&seeas=Show	Pseudomonas	101	3e-45		BCM	HDLJ		191938	2001-07-27	neb	HDLJP1D0200		Clone
	Ralstonia
		1090216672111		R	1094392465163	http://lgt.igs.umaryland.edu/traces/1094392465163_1090216672111.html	http://trace.ncbi.nlm.nih.gov/Traces/trace.cgi?&cmd=retrieve&val=TRACE_NAME='1094392465163' and TEMPLATE_ID='1090216672111'&dopt=trace&size=1&seeas=Show	Ralstonia	439	0		JCVI	Genomic-Sequencing-Diploid-Human-Reference-Genome	Genomic-Sequencing-Diploid-Human-Reference-Genome_T14116-JA-8P5-10P5KB	1090618072405			A300GW7J	e16	WGA
		165889_ABC8_000040290500_M11	165889_ABC8_000040290500_M11	R	61190981	http://lgt.igs.umaryland.edu/traces/61190981_165889_ABC8_000040290500_M11.html	http://trace.ncbi.nlm.nih.gov/Traces/trace.cgi?&cmd=retrieve&val=TRACE_NAME='61190981' and TEMPLATE_ID='165889_ABC8_000040290500_M11'&dopt=trace&size=1&seeas=Show	Ralstonia	281	1e-126	NA18507	ABC	Human_NA18507	ABC8		2005-09-26	ZQ	41953800	m11	WGA
	Ralstonia,uncultured
		163460_ABC7_000040592900_O19	ABC7_000040592900_O19	R	55048098	http://lgt.igs.umaryland.edu/traces/55048098_163460_ABC7_000040592900_O19.html	http://trace.ncbi.nlm.nih.gov/Traces/trace.cgi?&cmd=retrieve&val=TRACE_NAME='55048098' and TEMPLATE_ID='163460_ABC7_000040592900_O19'&dopt=trace&size=1&seeas=Show	Ralstonia,uncultured	344	7e-126	NA18517	ABC	Human_NA18517	ABC7		2005-06-22	AG	41714500	o19	WGA
	Rhizobium
		166475_ABC7_000000618122_L17	166475_ABC7_000000618122_L17	R	62061370	http://lgt.igs.umaryland.edu/traces/62061370_166475_ABC7_000000618122_L17.html	http://trace.ncbi.nlm.nih.gov/Traces/trace.cgi?&cmd=retrieve&val=TRACE_NAME='62061370' and TEMPLATE_ID='166475_ABC7_000000618122_L17'&dopt=trace&size=1&seeas=Show	Rhizobium	150	1e-38	NA18517	ABC	Human_NA18517	ABC7		2005-10-09	ZG	553722	l17	WGA
	Rhodococcus
		170215_ABC9_3_2_000043863800_L1	170215_ABC9_3_2_000043863800_L1	R	71668470	http://lgt.igs.umaryland.edu/traces/71668470_170215_ABC9_3_2_000043863800_L1.html	http://trace.ncbi.nlm.nih.gov/Traces/trace.cgi?&cmd=retrieve&val=TRACE_NAME='71668470' and TEMPLATE_ID='170215_ABC9_3_2_000043863800_L1'&dopt=trace&size=1&seeas=Show	Rhodococcus	107	2e-39	NA18956	ABC	Human_NA18956	ABC9_3_2		2006-02-24	ZQ	45995000	l1	WGA
	Rhodopseudomonas
		167000_ABC8_000000741040_F14	167000_ABC8_000000741040_F14	F	63995837	http://lgt.igs.umaryland.edu/traces/63995837_167000_ABC8_000000741040_F14.html	http://trace.ncbi.nlm.nih.gov/Traces/trace.cgi?&cmd=retrieve&val=TRACE_NAME='63995837' and TEMPLATE_ID='167000_ABC8_000000741040_F14'&dopt=trace&size=1&seeas=Show	Rhodopseudomonas	340	4e-90	NA18507	ABC	Human_NA18507	ABC8		2005-11-16	ZB	2684240	f14	WGA
		167098_ABC8_000000652622_G21	167098_ABC8_000000652622_G21	R	64480564	http://lgt.igs.umaryland.edu/traces/64480564_167098_ABC8_000000652622_G21.html	http://trace.ncbi.nlm.nih.gov/Traces/trace.cgi?&cmd=retrieve&val=TRACE_NAME='64480564' and TEMPLATE_ID='167098_ABC8_000000652622_G21'&dopt=trace&size=1&seeas=Show	Rhodopseudomonas	164	8e-64	NA18507	ABC	Human_NA18507	ABC8		2005-11-23	ZG	680522	g21	WGA
	Serratia
		167000_ABC8_000002140440_H17	167000_ABC8_000002140440_H17	F	64214994	http://lgt.igs.umaryland.edu/traces/64214994_167000_ABC8_000002140440_H17.html	http://trace.ncbi.nlm.nih.gov/Traces/trace.cgi?&cmd=retrieve&val=TRACE_NAME='64214994' and TEMPLATE_ID='167000_ABC8_000002140440_H17'&dopt=trace&size=1&seeas=Show	Serratia	569	2e-157	NA18507	ABC	Human_NA18507	ABC8		2005-11-20	ZV	829940	h17	WGA
		167098_ABC8_000000658722_E10	167098_ABC8_000000658722_E10	F	64469635	http://lgt.igs.umaryland.edu/traces/64469635_167098_ABC8_000000658722_E10.html	http://trace.ncbi.nlm.nih.gov/Traces/trace.cgi?&cmd=retrieve&val=TRACE_NAME='64469635' and TEMPLATE_ID='167098_ABC8_000000658722_E10'&dopt=trace&size=1&seeas=Show	Serratia	464	7e-157	NA18507	ABC	Human_NA18507	ABC8		2005-11-24	ZC	672522	e10	WGA
		HWWHP337777		F	51150077	http://lgt.igs.umaryland.edu/traces/51150077_HWWHP337777.html	http://trace.ncbi.nlm.nih.gov/Traces/trace.cgi?&cmd=retrieve&val=TRACE_NAME='51150077' and TEMPLATE_ID='HWWHP337777'&dopt=trace&size=1&seeas=Show	Serratia	256	2e-73		BCM	HWWH	HWWHP	680204	2003-03-24	gea	HWWHP1D337700
		HWWHQ260873		F	55334188	http://lgt.igs.umaryland.edu/traces/55334188_HWWHQ260873.html	http://trace.ncbi.nlm.nih.gov/Traces/trace.cgi?&cmd=retrieve&val=TRACE_NAME='55334188' and TEMPLATE_ID='HWWHQ260873'&dopt=trace&size=1&seeas=Show	Serratia	269	2e-64		BCM	HWWH	HWWHQ	732910	2003-05-11	mne	HWWHQ1D260800
		HWWIP98314		R	56044187	http://lgt.igs.umaryland.edu/traces/56044187_HWWIP98314.html	http://trace.ncbi.nlm.nih.gov/Traces/trace.cgi?&cmd=retrieve&val=TRACE_NAME='56044187' and TEMPLATE_ID='HWWIP98314'&dopt=trace&size=1&seeas=Show	Serratia	376	2e-99		BCM	HWWI	HWWIP	741898	2003-05-19	arg	HWWIP1E98300
		HWWIP190625		F	56288853	http://lgt.igs.umaryland.edu/traces/56288853_HWWIP190625.html	http://trace.ncbi.nlm.nih.gov/Traces/trace.cgi?&cmd=retrieve&val=TRACE_NAME='56288853' and TEMPLATE_ID='HWWIP190625'&dopt=trace&size=1&seeas=Show	Serratia	258	3e-98		BCM	HWWI	HWWIP	744799	2003-05-22	por	HWWIP1D190600
		HWWIP240818		F	56721271	http://lgt.igs.umaryland.edu/traces/56721271_HWWIP240818.html	http://trace.ncbi.nlm.nih.gov/Traces/trace.cgi?&cmd=retrieve&val=TRACE_NAME='56721271' and TEMPLATE_ID='HWWIP240818'&dopt=trace&size=1&seeas=Show	Serratia	299	1e-91		BCM	HWWI	HWWIP	749734	2003-05-27	mad	HWWIP1D240800
		HWWIP214422		R	56382335	http://lgt.igs.umaryland.edu/traces/56382335_HWWIP214422.html	http://trace.ncbi.nlm.nih.gov/Traces/trace.cgi?&cmd=retrieve&val=TRACE_NAME='56382335' and TEMPLATE_ID='HWWIP214422'&dopt=trace&size=1&seeas=Show	Serratia	263	6e-106		BCM	HWWI	HWWIP	746138	2003-05-23	vtm	HWWIP1E214400
		HWWIP220974		F	56448266	http://lgt.igs.umaryland.edu/traces/56448266_HWWIP220974.html	http://trace.ncbi.nlm.nih.gov/Traces/trace.cgi?&cmd=retrieve&val=TRACE_NAME='56448266' and TEMPLATE_ID='HWWIP220974'&dopt=trace&size=1&seeas=Show	Serratia	595	3e-163		BCM	HWWI	HWWIP	746842	2003-05-23	swd	HWWIP1D220900
		HWWHP364582		R	51363015	http://lgt.igs.umaryland.edu/traces/51363015_HWWHP364582.html	http://trace.ncbi.nlm.nih.gov/Traces/trace.cgi?&cmd=retrieve&val=TRACE_NAME='51363015' and TEMPLATE_ID='HWWHP364582'&dopt=trace&size=1&seeas=Show	Serratia	169	2e-83		BCM	HWWH	HWWHP	682712	2003-03-27	wis	HWWHP1E364500
		HWWHP436069		R	51702606	http://lgt.igs.umaryland.edu/traces/51702606_HWWHP436069.html	http://trace.ncbi.nlm.nih.gov/Traces/trace.cgi?&cmd=retrieve&val=TRACE_NAME='51702606' and TEMPLATE_ID='HWWHP436069'&dopt=trace&size=1&seeas=Show	Serratia	372	3e-85		BCM	HWWH	HWWHP	686625	2003-03-31	gre	HWWHP1E436000
		HWWHP456411		R	51735765	http://lgt.igs.umaryland.edu/traces/51735765_HWWHP456411.html	http://trace.ncbi.nlm.nih.gov/Traces/trace.cgi?&cmd=retrieve&val=TRACE_NAME='51735765' and TEMPLATE_ID='HWWHP456411'&dopt=trace&size=1&seeas=Show	Serratia	105	3e-33		BCM	HWWH	HWWHP	687129	2003-03-31	den	HWWHP1E456400
		167098_ABC8_000040991600_E23	167098_ABC8_000040991600_E23	R	65682811	http://lgt.igs.umaryland.edu/traces/65682811_167098_ABC8_000040991600_E23.html	http://trace.ncbi.nlm.nih.gov/Traces/trace.cgi?&cmd=retrieve&val=TRACE_NAME='65682811' and TEMPLATE_ID='167098_ABC8_000040991600_E23'&dopt=trace&size=1&seeas=Show	Serratia	344	2e-92	NA18507	ABC	Human_NA18507	ABC8		2005-12-12	AA	43688600	e23	WGA
		167098_ABC8_000041794100_N6	167098_ABC8_000041794100_N6	R	64615205	http://lgt.igs.umaryland.edu/traces/64615205_167098_ABC8_000041794100_N6.html	http://trace.ncbi.nlm.nih.gov/Traces/trace.cgi?&cmd=retrieve&val=TRACE_NAME='64615205' and TEMPLATE_ID='167098_ABC8_000041794100_N6'&dopt=trace&size=1&seeas=Show	Serratia	286	7e-89	NA18507	ABC	Human_NA18507	ABC8		2005-11-26	ZL	40854900	n6	WGA
		167098_ABC8_000041044400_H10	167098_ABC8_000041044400_H10	F	66168410	http://lgt.igs.umaryland.edu/traces/66168410_167098_ABC8_000041044400_H10.html	http://trace.ncbi.nlm.nih.gov/Traces/trace.cgi?&cmd=retrieve&val=TRACE_NAME='66168410' and TEMPLATE_ID='167098_ABC8_000041044400_H10'&dopt=trace&size=1&seeas=Show	Serratia	103	3e-32	NA18507	ABC	Human_NA18507	ABC8		2005-12-18	ZK	44901700	h10	WGA
		167098_ABC8_000041078800_G11	167098_ABC8_000041078800_G11	R	66630228	http://lgt.igs.umaryland.edu/traces/66630228_167098_ABC8_000041078800_G11.html	http://trace.ncbi.nlm.nih.gov/Traces/trace.cgi?&cmd=retrieve&val=TRACE_NAME='66630228' and TEMPLATE_ID='167098_ABC8_000041078800_G11'&dopt=trace&size=1&seeas=Show	Serratia	225	3e-88	NA18507	ABC	Human_NA18507	ABC8		2005-12-24	ZM	45618400	g11	WGA
		HWWHP208508		F	50047642	http://lgt.igs.umaryland.edu/traces/50047642_HWWHP208508.html	http://trace.ncbi.nlm.nih.gov/Traces/trace.cgi?&cmd=retrieve&val=TRACE_NAME='50047642' and TEMPLATE_ID='HWWHP208508'&dopt=trace&size=1&seeas=Show	Serratia	222	9e-70		BCM	HWWH	HWWHP	666887	2003-03-12	ind	HWWHP1D208500
		166081_ABC8_000043017700_D19	166081_ABC8_000043017700_D19	F	61643590	http://lgt.igs.umaryland.edu/traces/61643590_166081_ABC8_000043017700_D19.html	http://trace.ncbi.nlm.nih.gov/Traces/trace.cgi?&cmd=retrieve&val=TRACE_NAME='61643590' and TEMPLATE_ID='166081_ABC8_000043017700_D19'&dopt=trace&size=1&seeas=Show	Serratia	283	1e-84	NA18507	ABC	Human_NA18507	ABC8		2005-10-02	ZQ	42656900	d19	WGA
		HWWIP250575		F	56569327	http://lgt.igs.umaryland.edu/traces/56569327_HWWIP250575.html	http://trace.ncbi.nlm.nih.gov/Traces/trace.cgi?&cmd=retrieve&val=TRACE_NAME='56569327' and TEMPLATE_ID='HWWIP250575'&dopt=trace&size=1&seeas=Show	Serratia	258	2e-105		BCM	HWWI	HWWIP	748119	2003-05-25	kwt	HWWIP1D250500
	Sinorhizobium
		167098_ABC8_000041063400_G3	167098_ABC8_000041063400_G3	F	66424246	http://lgt.igs.umaryland.edu/traces/66424246_167098_ABC8_000041063400_G3.html	http://trace.ncbi.nlm.nih.gov/Traces/trace.cgi?&cmd=retrieve&val=TRACE_NAME='66424246' and TEMPLATE_ID='167098_ABC8_000041063400_G3'&dopt=trace&size=1&seeas=Show	Sinorhizobium	103	1e-41	NA18507	ABC	Human_NA18507	ABC8		2005-12-22	AF	44930800	g3	WGA
	Sphingobium
		170215_ABC9_3_2_000043891200_L6	170215_ABC9_3_2_000043891200_L6	F	72508346	http://lgt.igs.umaryland.edu/traces/72508346_170215_ABC9_3_2_000043891200_L6.html	http://trace.ncbi.nlm.nih.gov/Traces/trace.cgi?&cmd=retrieve&val=TRACE_NAME='72508346' and TEMPLATE_ID='170215_ABC9_3_2_000043891200_L6'&dopt=trace&size=1&seeas=Show	Sphingobium	471	7e-111	NA18956	ABC	Human_NA18956	ABC9_3_2		2006-03-04	ZS	46080100	l6	WGA
		HWWHP329445		R	51033284	http://lgt.igs.umaryland.edu/traces/51033284_HWWHP329445.html	http://trace.ncbi.nlm.nih.gov/Traces/trace.cgi?&cmd=retrieve&val=TRACE_NAME='51033284' and TEMPLATE_ID='HWWHP329445'&dopt=trace&size=1&seeas=Show	Sphingobium	163	6e-44		BCM	HWWH	HWWHP	678794	2003-03-23	pru	HWWHP1E329400
		170215_ABC9_3_2_000043834900_E11	170215_ABC9_3_2_000043834900_E11	F	71303441	http://lgt.igs.umaryland.edu/traces/71303441_170215_ABC9_3_2_000043834900_E11.html	http://trace.ncbi.nlm.nih.gov/Traces/trace.cgi?&cmd=retrieve&val=TRACE_NAME='71303441' and TEMPLATE_ID='170215_ABC9_3_2_000043834900_E11'&dopt=trace&size=1&seeas=Show	Sphingobium	461	2e-107	NA18956	ABC	Human_NA18956	ABC9_3_2		2006-02-20	ZU	45942900	e11	WGA
	Staphylococcus
		6S17_2-606g11		R	6S17_2-606g11.q1k	http://lgt.igs.umaryland.edu/traces/6S17_2-606g11.q1k_6S17_2-606g11.html	http://trace.ncbi.nlm.nih.gov/Traces/trace.cgi?&cmd=retrieve&val=TRACE_NAME='6S17_2-606g11.q1k' and TEMPLATE_ID='6S17_2-606g11'&dopt=trace&size=1&seeas=Show	Staphylococcus	160	1e-82	NA17119	SC	Chr_6_17119	62362		2003-07-03		6S17_2-606	g11	SNP
	Stenotrophomonas
		HEOKP0941	RP11-515N19	F	38028177	http://lgt.igs.umaryland.edu/traces/38028177_HEOKP0941.html	http://trace.ncbi.nlm.nih.gov/Traces/trace.cgi?&cmd=retrieve&val=TRACE_NAME='38028177' and TEMPLATE_ID='HEOKP0941'&dopt=trace&size=1&seeas=Show	Stenotrophomonas	273	5e-124		BCM	HEOK	HEOKP	521364	2002-10-06	fij	HEOKP1D0900
		167000_ABC8_000002623640_E5	167000_ABC8_000002623640_E5	F	63816975	http://lgt.igs.umaryland.edu/traces/63816975_167000_ABC8_000002623640_E5.html	http://trace.ncbi.nlm.nih.gov/Traces/trace.cgi?&cmd=retrieve&val=TRACE_NAME='63816975' and TEMPLATE_ID='167000_ABC8_000002623640_E5'&dopt=trace&size=1&seeas=Show	Stenotrophomonas	108	3e-42	NA18507	ABC	Human_NA18507	ABC8		2005-11-13	ZC	2656340	e5	WGA
		HWWHQ41201		F	52374854	http://lgt.igs.umaryland.edu/traces/52374854_HWWHQ41201.html	http://trace.ncbi.nlm.nih.gov/Traces/trace.cgi?&cmd=retrieve&val=TRACE_NAME='52374854' and TEMPLATE_ID='HWWHQ41201'&dopt=trace&size=1&seeas=Show	Stenotrophomonas	116	6e-40		BCM	HWWH	HWWHQ	695138	2003-04-07	lsa	HWWHQ1D41200
		HWWHP678074		F	51989246	http://lgt.igs.umaryland.edu/traces/51989246_HWWHP678074.html	http://trace.ncbi.nlm.nih.gov/Traces/trace.cgi?&cmd=retrieve&val=TRACE_NAME='51989246' and TEMPLATE_ID='HWWHP678074'&dopt=trace&size=1&seeas=Show	Stenotrophomonas	206	2e-86		BCM	HWWH	HWWHP	690489	2003-04-03	bol	HWWHP1D678000
		HWWHP665352		F	52091271	http://lgt.igs.umaryland.edu/traces/52091271_HWWHP665352.html	http://trace.ncbi.nlm.nih.gov/Traces/trace.cgi?&cmd=retrieve&val=TRACE_NAME='52091271' and TEMPLATE_ID='HWWHP665352'&dopt=trace&size=1&seeas=Show	Stenotrophomonas	203	3e-77		BCM	HWWH	HWWHP	691949	2003-04-04	por	HWWHP1D665300
		HWWHP71192		F	49243771	http://lgt.igs.umaryland.edu/traces/49243771_HWWHP71192.html	http://trace.ncbi.nlm.nih.gov/Traces/trace.cgi?&cmd=retrieve&val=TRACE_NAME='49243771' and TEMPLATE_ID='HWWHP71192'&dopt=trace&size=1&seeas=Show	Stenotrophomonas	235	6e-87		BCM	HWWH	HWWHP	657424	2003-03-03	mad	HWWHP1D71100
		HWWHP111694		R	50208967	http://lgt.igs.umaryland.edu/traces/50208967_HWWHP111694.html	http://trace.ncbi.nlm.nih.gov/Traces/trace.cgi?&cmd=retrieve&val=TRACE_NAME='50208967' and TEMPLATE_ID='HWWHP111694'&dopt=trace&size=1&seeas=Show	Stenotrophomonas	309	2e-138		BCM	HWWH	HWWHP	668865	2003-03-14	cal	HWWHP1E111600
		HWWHP71879		R	50163932	http://lgt.igs.umaryland.edu/traces/50163932_HWWHP71879.html	http://trace.ncbi.nlm.nih.gov/Traces/trace.cgi?&cmd=retrieve&val=TRACE_NAME='50163932' and TEMPLATE_ID='HWWHP71879'&dopt=trace&size=1&seeas=Show	Stenotrophomonas	215	8e-80		BCM	HWWH	HWWHP	668371	2003-03-13	jam	HWWHP1E71800
		HWWHQ15379		F	52040717	http://lgt.igs.umaryland.edu/traces/52040717_HWWHQ15379.html	http://trace.ncbi.nlm.nih.gov/Traces/trace.cgi?&cmd=retrieve&val=TRACE_NAME='52040717' and TEMPLATE_ID='HWWHQ15379'&dopt=trace&size=1&seeas=Show	Stenotrophomonas	336	1e-161		BCM	HWWH	HWWHQ	691282	2003-04-03	ill	HWWHQ1D15300
		HWWHP801056		R	51845755	http://lgt.igs.umaryland.edu/traces/51845755_HWWHP801056.html	http://trace.ncbi.nlm.nih.gov/Traces/trace.cgi?&cmd=retrieve&val=TRACE_NAME='51845755' and TEMPLATE_ID='HWWHP801056'&dopt=trace&size=1&seeas=Show	Stenotrophomonas	162	2e-43		BCM	HWWH	HWWHP	688476	2003-04-02	sgp	HWWHP1E801000
		HWWHP670127		R	51743395	http://lgt.igs.umaryland.edu/traces/51743395_HWWHP670127.html	http://trace.ncbi.nlm.nih.gov/Traces/trace.cgi?&cmd=retrieve&val=TRACE_NAME='51743395' and TEMPLATE_ID='HWWHP670127'&dopt=trace&size=1&seeas=Show	Stenotrophomonas	130	1e-38		BCM	HWWH	HWWHP	687209	2003-03-31	sam	HWWHP1E670100
		HWWHQ41370		F	52149672	http://lgt.igs.umaryland.edu/traces/52149672_HWWHQ41370.html	http://trace.ncbi.nlm.nih.gov/Traces/trace.cgi?&cmd=retrieve&val=TRACE_NAME='52149672' and TEMPLATE_ID='HWWHQ41370'&dopt=trace&size=1&seeas=Show	Stenotrophomonas	116	3e-42		BCM	HWWH	HWWHQ	692561	2003-04-05	gre	HWWHQ1D41300
		HWWHP143280		R	50536441	http://lgt.igs.umaryland.edu/traces/50536441_HWWHP143280.html	http://trace.ncbi.nlm.nih.gov/Traces/trace.cgi?&cmd=retrieve&val=TRACE_NAME='50536441' and TEMPLATE_ID='HWWHP143280'&dopt=trace&size=1&seeas=Show	Stenotrophomonas	143	2e-46		BCM	HWWH	HWWHP	672710	2003-03-17	ice	HWWHP1E143200
		HWWHP824119		F	51561052	http://lgt.igs.umaryland.edu/traces/51561052_HWWHP824119.html	http://trace.ncbi.nlm.nih.gov/Traces/trace.cgi?&cmd=retrieve&val=TRACE_NAME='51561052' and TEMPLATE_ID='HWWHP824119'&dopt=trace&size=1&seeas=Show	Stenotrophomonas	311	7e-161		BCM	HWWH	HWWHP	685078	2003-03-29	phi	HWWHP1D824100
		HWWHP100625		F	50831629	http://lgt.igs.umaryland.edu/traces/50831629_HWWHP100625.html	http://trace.ncbi.nlm.nih.gov/Traces/trace.cgi?&cmd=retrieve&val=TRACE_NAME='50831629' and TEMPLATE_ID='HWWHP100625'&dopt=trace&size=1&seeas=Show	Stenotrophomonas	470	4e-165		BCM	HWWH	HWWHP	676530	2003-03-21	rus	HWWHP2D100600
		HWWHP168065		R	50554888	http://lgt.igs.umaryland.edu/traces/50554888_HWWHP168065.html	http://trace.ncbi.nlm.nih.gov/Traces/trace.cgi?&cmd=retrieve&val=TRACE_NAME='50554888' and TEMPLATE_ID='HWWHP168065'&dopt=trace&size=1&seeas=Show	Stenotrophomonas	173	9e-74		BCM	HWWH	HWWHP	673011	2003-03-18	bol	HWWHP1E168000
		HWWHP870842		R	51941358	http://lgt.igs.umaryland.edu/traces/51941358_HWWHP870842.html	http://trace.ncbi.nlm.nih.gov/Traces/trace.cgi?&cmd=retrieve&val=TRACE_NAME='51941358' and TEMPLATE_ID='HWWHP870842'&dopt=trace&size=1&seeas=Show	Stenotrophomonas	145	1e-23		BCM	HWWH	HWWHP	689727	2003-04-03	ukr	HWWHP1E870800
		174779_ABC12_000046924200_H23	174779_ABC12_000046924200_H23	R	84293780	http://lgt.igs.umaryland.edu/traces/84293780_174779_ABC12_000046924200_H23.html	http://trace.ncbi.nlm.nih.gov/Traces/trace.cgi?&cmd=retrieve&val=TRACE_NAME='84293780' and TEMPLATE_ID='174779_ABC12_000046924200_H23'&dopt=trace&size=1&seeas=Show	Stenotrophomonas	177	2e-83	NA12878	ABC	Human_NA12878	ABC12		2006-06-18	AJ	46945600	h23	WGA
		174779_ABC12_000046853500_E22	174779_ABC12_000046853500_E22	R	83932925	http://lgt.igs.umaryland.edu/traces/83932925_174779_ABC12_000046853500_E22.html	http://trace.ncbi.nlm.nih.gov/Traces/trace.cgi?&cmd=retrieve&val=TRACE_NAME='83932925' and TEMPLATE_ID='174779_ABC12_000046853500_E22'&dopt=trace&size=1&seeas=Show	Stenotrophomonas	205	4e-93	NA12878	ABC	Human_NA12878	ABC12		2006-06-15	ZF	46875000	e22	WGA
		HWWIP2268		R	55536658	http://lgt.igs.umaryland.edu/traces/55536658_HWWIP2268.html	http://trace.ncbi.nlm.nih.gov/Traces/trace.cgi?&cmd=retrieve&val=TRACE_NAME='55536658' and TEMPLATE_ID='HWWIP2268'&dopt=trace&size=1&seeas=Show	Stenotrophomonas	185	2e-76		BCM	HWWI	HWWIP	735916	2003-05-13	hwi	HWWIP1E2200
		HWWHP222949		R	50734160	http://lgt.igs.umaryland.edu/traces/50734160_HWWHP222949.html	http://trace.ncbi.nlm.nih.gov/Traces/trace.cgi?&cmd=retrieve&val=TRACE_NAME='50734160' and TEMPLATE_ID='HWWHP222949'&dopt=trace&size=1&seeas=Show	Stenotrophomonas	404	5e-171		BCM	HWWH	HWWHP	675281	2003-03-20	syr	HWWHP1E222900
		HWWFP0025		F	47684642	http://lgt.igs.umaryland.edu/traces/47684642_HWWFP0025.html	http://trace.ncbi.nlm.nih.gov/Traces/trace.cgi?&cmd=retrieve&val=TRACE_NAME='47684642' and TEMPLATE_ID='HWWFP0025'&dopt=trace&size=1&seeas=Show	Stenotrophomonas	210	7e-53		BCM	HWWF	HWWFP	639746	2003-02-13	por	HWWFP1D0000
		HWWHQ170402		F	54984181	http://lgt.igs.umaryland.edu/traces/54984181_HWWHQ170402.html	http://trace.ncbi.nlm.nih.gov/Traces/trace.cgi?&cmd=retrieve&val=TRACE_NAME='54984181' and TEMPLATE_ID='HWWHQ170402'&dopt=trace&size=1&seeas=Show	Stenotrophomonas	226	3e-74		BCM	HWWH	HWWHQ	728579	2003-05-07	mad	HWWHQ1D170400
		HWWHQ248970		R	55229699	http://lgt.igs.umaryland.edu/traces/55229699_HWWHQ248970.html	http://trace.ncbi.nlm.nih.gov/Traces/trace.cgi?&cmd=retrieve&val=TRACE_NAME='55229699' and TEMPLATE_ID='HWWHQ248970'&dopt=trace&size=1&seeas=Show	Stenotrophomonas	139	8e-49		BCM	HWWH	HWWHQ	731795	2003-05-10	sda	HWWHQ1E248900
		HWWIP2268		F	55536594	http://lgt.igs.umaryland.edu/traces/55536594_HWWIP2268.html	http://trace.ncbi.nlm.nih.gov/Traces/trace.cgi?&cmd=retrieve&val=TRACE_NAME='55536594' and TEMPLATE_ID='HWWIP2268'&dopt=trace&size=1&seeas=Show	Stenotrophomonas	158	8e-58		BCM	HWWI	HWWIP	735916	2003-05-13	hwi	HWWIP1D2200
		HWWHQ214425		F	55018205	http://lgt.igs.umaryland.edu/traces/55018205_HWWHQ214425.html	http://trace.ncbi.nlm.nih.gov/Traces/trace.cgi?&cmd=retrieve&val=TRACE_NAME='55018205' and TEMPLATE_ID='HWWHQ214425'&dopt=trace&size=1&seeas=Show	Stenotrophomonas	214	2e-81		BCM	HWWH	HWWHQ	728936	2003-05-08	vnz	HWWHQ1D214400
		HWWHQ176555		R	55006098	http://lgt.igs.umaryland.edu/traces/55006098_HWWHQ176555.html	http://trace.ncbi.nlm.nih.gov/Traces/trace.cgi?&cmd=retrieve&val=TRACE_NAME='55006098' and TEMPLATE_ID='HWWHQ176555'&dopt=trace&size=1&seeas=Show	Stenotrophomonas	428	4e-156		BCM	HWWH	HWWHQ	728808	2003-05-07	sam	HWWHQ1E176500
		HWWHQ186137		F	55136889	http://lgt.igs.umaryland.edu/traces/55136889_HWWHQ186137.html	http://trace.ncbi.nlm.nih.gov/Traces/trace.cgi?&cmd=retrieve&val=TRACE_NAME='55136889' and TEMPLATE_ID='HWWHQ186137'&dopt=trace&size=1&seeas=Show	Stenotrophomonas	501	0		BCM	HWWH	HWWHQ	730332	2003-05-09	ina	HWWHQ1D186100
		HWWHP29878		R	49485506	http://lgt.igs.umaryland.edu/traces/49485506_HWWHP29878.html	http://trace.ncbi.nlm.nih.gov/Traces/trace.cgi?&cmd=retrieve&val=TRACE_NAME='49485506' and TEMPLATE_ID='HWWHP29878'&dopt=trace&size=1&seeas=Show	Stenotrophomonas	149	3e-52		BCM	HWWH	HWWHP	660291	2003-03-06	cha	HWWHP1E29800
		HWWHP228828		R	50779372	http://lgt.igs.umaryland.edu/traces/50779372_HWWHP228828.html	http://trace.ncbi.nlm.nih.gov/Traces/trace.cgi?&cmd=retrieve&val=TRACE_NAME='50779372' and TEMPLATE_ID='HWWHP228828'&dopt=trace&size=1&seeas=Show	Stenotrophomonas	236	6e-102		BCM	HWWH	HWWHP	675815	2003-03-20	pen	HWWHP1E228800
		HWWHQ227492		R	55117354	http://lgt.igs.umaryland.edu/traces/55117354_HWWHQ227492.html	http://trace.ncbi.nlm.nih.gov/Traces/trace.cgi?&cmd=retrieve&val=TRACE_NAME='55117354' and TEMPLATE_ID='HWWHQ227492'&dopt=trace&size=1&seeas=Show	Stenotrophomonas	264	3e-97		BCM	HWWH	HWWHQ	730033	2003-05-08	gea	HWWHQ1E227400
		HWWHQ56078		F	54735518	http://lgt.igs.umaryland.edu/traces/54735518_HWWHQ56078.html	http://trace.ncbi.nlm.nih.gov/Traces/trace.cgi?&cmd=retrieve&val=TRACE_NAME='54735518' and TEMPLATE_ID='HWWHQ56078'&dopt=trace&size=1&seeas=Show	Stenotrophomonas	193	7e-50		BCM	HWWH	HWWHQ	724710	2003-05-04	sla	HWWHQ1D56000
		HWWHP190944		R	50588931	http://lgt.igs.umaryland.edu/traces/50588931_HWWHP190944.html	http://trace.ncbi.nlm.nih.gov/Traces/trace.cgi?&cmd=retrieve&val=TRACE_NAME='50588931' and TEMPLATE_ID='HWWHP190944'&dopt=trace&size=1&seeas=Show	Stenotrophomonas	115	4e-44		BCM	HWWH	HWWHP	673596	2003-03-18	tld	HWWHP1E190900
		HWWHP277286		R	50858347	http://lgt.igs.umaryland.edu/traces/50858347_HWWHP277286.html	http://trace.ncbi.nlm.nih.gov/Traces/trace.cgi?&cmd=retrieve&val=TRACE_NAME='50858347' and TEMPLATE_ID='HWWHP277286'&dopt=trace&size=1&seeas=Show	Stenotrophomonas	193	6e-81		BCM	HWWH	HWWHP	676863	2003-03-22	pan	HWWHP1E277200
		HWWHP269358		R	50902404	http://lgt.igs.umaryland.edu/traces/50902404_HWWHP269358.html	http://trace.ncbi.nlm.nih.gov/Traces/trace.cgi?&cmd=retrieve&val=TRACE_NAME='50902404' and TEMPLATE_ID='HWWHP269358'&dopt=trace&size=1&seeas=Show	Stenotrophomonas	175	8e-61		BCM	HWWH	HWWHP	677425	2003-03-22	ire	HWWHP1E269300
		HWWIP367772		F	56800532	http://lgt.igs.umaryland.edu/traces/56800532_HWWIP367772.html	http://trace.ncbi.nlm.nih.gov/Traces/trace.cgi?&cmd=retrieve&val=TRACE_NAME='56800532' and TEMPLATE_ID='HWWIP367772'&dopt=trace&size=1&seeas=Show	Stenotrophomonas	126	4e-48		BCM	HWWI	HWWIP	750867	2003-05-28	blz	HWWIP1D367700
		HWWIP16889		R	55859185	http://lgt.igs.umaryland.edu/traces/55859185_HWWIP16889.html	http://trace.ncbi.nlm.nih.gov/Traces/trace.cgi?&cmd=retrieve&val=TRACE_NAME='55859185' and TEMPLATE_ID='HWWIP16889'&dopt=trace&size=1&seeas=Show	Stenotrophomonas	235	3e-94		BCM	HWWI	HWWIP	739903	2003-05-17	ina	HWWIP1E16800
		HWWIP166817		R	56202879	http://lgt.igs.umaryland.edu/traces/56202879_HWWIP166817.html	http://trace.ncbi.nlm.nih.gov/Traces/trace.cgi?&cmd=retrieve&val=TRACE_NAME='56202879' and TEMPLATE_ID='HWWIP166817'&dopt=trace&size=1&seeas=Show	Stenotrophomonas	495	0		BCM	HWWI	HWWIP	743673	2003-05-21	kns	HWWIP1E166800
		HWWIP281818		R	56687914	http://lgt.igs.umaryland.edu/traces/56687914_HWWIP281818.html	http://trace.ncbi.nlm.nih.gov/Traces/trace.cgi?&cmd=retrieve&val=TRACE_NAME='56687914' and TEMPLATE_ID='HWWIP281818'&dopt=trace&size=1&seeas=Show	Stenotrophomonas	506	0		BCM	HWWI	HWWIP	749359	2003-05-26	bol	HWWIP1E281800
		HWWHQ447308		F	55928784	http://lgt.igs.umaryland.edu/traces/55928784_HWWHQ447308.html	http://trace.ncbi.nlm.nih.gov/Traces/trace.cgi?&cmd=retrieve&val=TRACE_NAME='55928784' and TEMPLATE_ID='HWWHQ447308'&dopt=trace&size=1&seeas=Show	Stenotrophomonas	522	0		BCM	HWWH	HWWHQ	740632	2003-05-18	bra	HWWHQ1D447300
		HWWIP105434		R	55977377	http://lgt.igs.umaryland.edu/traces/55977377_HWWIP105434.html	http://trace.ncbi.nlm.nih.gov/Traces/trace.cgi?&cmd=retrieve&val=TRACE_NAME='55977377' and TEMPLATE_ID='HWWIP105434'&dopt=trace&size=1&seeas=Show	Stenotrophomonas	179	1e-72		BCM	HWWI	HWWIP	741142	2003-05-18	jam	HWWIP1E105400
		HWWIP88804		R	56116765	http://lgt.igs.umaryland.edu/traces/56116765_HWWIP88804.html	http://trace.ncbi.nlm.nih.gov/Traces/trace.cgi?&cmd=retrieve&val=TRACE_NAME='56116765' and TEMPLATE_ID='HWWIP88804'&dopt=trace&size=1&seeas=Show	Stenotrophomonas	148	5e-42		BCM	HWWI	HWWIP	742666	2003-05-20	cha	HWWIP1E88800
		HWWIP56408		F	55702645	http://lgt.igs.umaryland.edu/traces/55702645_HWWIP56408.html	http://trace.ncbi.nlm.nih.gov/Traces/trace.cgi?&cmd=retrieve&val=TRACE_NAME='55702645' and TEMPLATE_ID='HWWIP56408'&dopt=trace&size=1&seeas=Show	Stenotrophomonas	567	0		BCM	HWWI	HWWIP	737932	2003-05-15	sam	HWWIP1D56400
		HWWIP139710		R	56095099	http://lgt.igs.umaryland.edu/traces/56095099_HWWIP139710.html	http://trace.ncbi.nlm.nih.gov/Traces/trace.cgi?&cmd=retrieve&val=TRACE_NAME='56095099' and TEMPLATE_ID='HWWIP139710'&dopt=trace&size=1&seeas=Show	Stenotrophomonas	512	0		BCM	HWWI	HWWIP	742439	2003-05-20	okl	HWWIP1E139700
		HWWIP234579		R	56610609	http://lgt.igs.umaryland.edu/traces/56610609_HWWIP234579.html	http://trace.ncbi.nlm.nih.gov/Traces/trace.cgi?&cmd=retrieve&val=TRACE_NAME='56610609' and TEMPLATE_ID='HWWIP234579'&dopt=trace&size=1&seeas=Show	Stenotrophomonas	259	7e-80		BCM	HWWI	HWWIP	748549	2003-05-25	wsh	HWWIP1E234500
		HWWIP21792		F	55878116	http://lgt.igs.umaryland.edu/traces/55878116_HWWIP21792.html	http://trace.ncbi.nlm.nih.gov/Traces/trace.cgi?&cmd=retrieve&val=TRACE_NAME='55878116' and TEMPLATE_ID='HWWIP21792'&dopt=trace&size=1&seeas=Show	Stenotrophomonas	515	0		BCM	HWWI	HWWIP	740101	2003-05-17	kwt	HWWIP1D21700
		HWWIP293407		F	56641230	http://lgt.igs.umaryland.edu/traces/56641230_HWWIP293407.html	http://trace.ncbi.nlm.nih.gov/Traces/trace.cgi?&cmd=retrieve&val=TRACE_NAME='56641230' and TEMPLATE_ID='HWWIP293407'&dopt=trace&size=1&seeas=Show	Stenotrophomonas	510	0		BCM	HWWI	HWWIP	748872	2003-05-25	can	HWWIP1D293400
		HWWIP157465		F	56066324	http://lgt.igs.umaryland.edu/traces/56066324_HWWIP157465.html	http://trace.ncbi.nlm.nih.gov/Traces/trace.cgi?&cmd=retrieve&val=TRACE_NAME='56066324' and TEMPLATE_ID='HWWIP157465'&dopt=trace&size=1&seeas=Show	Stenotrophomonas	586	0		BCM	HWWI	HWWIP	742128	2003-05-19	gbt	HWWIP1D157400
		HWWHQ79840		F	54641629	http://lgt.igs.umaryland.edu/traces/54641629_HWWHQ79840.html	http://trace.ncbi.nlm.nih.gov/Traces/trace.cgi?&cmd=retrieve&val=TRACE_NAME='54641629' and TEMPLATE_ID='HWWHQ79840'&dopt=trace&size=1&seeas=Show	Stenotrophomonas	133	2e-47		BCM	HWWH	HWWHQ	723724	2003-05-03	rus	HWWHQ1D79800
		HWWHP46342		F	49954981	http://lgt.igs.umaryland.edu/traces/49954981_HWWHP46342.html	http://trace.ncbi.nlm.nih.gov/Traces/trace.cgi?&cmd=retrieve&val=TRACE_NAME='49954981' and TEMPLATE_ID='HWWHP46342'&dopt=trace&size=1&seeas=Show	Stenotrophomonas	140	2e-44		BCM	HWWH	HWWHP	665786	2003-03-11	phi	HWWHP1D46300
		HWWHP467113		F	51684822	http://lgt.igs.umaryland.edu/traces/51684822_HWWHP467113.html	http://trace.ncbi.nlm.nih.gov/Traces/trace.cgi?&cmd=retrieve&val=TRACE_NAME='51684822' and TEMPLATE_ID='HWWHP467113'&dopt=trace&size=1&seeas=Show	Stenotrophomonas	121	3e-45		BCM	HWWH	HWWHP	686374	2003-03-30	ala	HWWHP1D467100
		HCYAQ0442	RP11-200I19	F	33413928	http://lgt.igs.umaryland.edu/traces/33413928_HCYAQ0442.html	http://trace.ncbi.nlm.nih.gov/Traces/trace.cgi?&cmd=retrieve&val=TRACE_NAME='33413928' and TEMPLATE_ID='HCYAQ0442'&dopt=trace&size=1&seeas=Show	Stenotrophomonas	319	1e-146		BCM	HCYA	HCYAQ	461120	2002-07-20	wsh	HCYAQ1D0400
		166752_ABC7_000043062400_D10	166752_ABC7_000043062400_D10	R	62339970	http://lgt.igs.umaryland.edu/traces/62339970_166752_ABC7_000043062400_D10.html	http://trace.ncbi.nlm.nih.gov/Traces/trace.cgi?&cmd=retrieve&val=TRACE_NAME='62339970' and TEMPLATE_ID='166752_ABC7_000043062400_D10'&dopt=trace&size=1&seeas=Show	Stenotrophomonas	262	4e-115	NA18517	ABC	Human_NA18517	ABC7		2005-10-16	ZJ	42737100	d10	WGA
		166640_ABC7_000043042600_L23	166640_ABC7_000043042600_L23	F	62169618	http://lgt.igs.umaryland.edu/traces/62169618_166640_ABC7_000043042600_L23.html	http://trace.ncbi.nlm.nih.gov/Traces/trace.cgi?&cmd=retrieve&val=TRACE_NAME='62169618' and TEMPLATE_ID='166640_ABC7_000043042600_L23'&dopt=trace&size=1&seeas=Show	Stenotrophomonas	328	4e-164	NA18517	ABC	Human_NA18517	ABC7		2005-10-11	AE	42694100	l23	WGA
		166791_ABC7_000043072100_P14	166791_ABC7_000043072100_P14	F	62526992	http://lgt.igs.umaryland.edu/traces/62526992_166791_ABC7_000043072100_P14.html	http://trace.ncbi.nlm.nih.gov/Traces/trace.cgi?&cmd=retrieve&val=TRACE_NAME='62526992' and TEMPLATE_ID='166791_ABC7_000043072100_P14'&dopt=trace&size=1&seeas=Show	Stenotrophomonas	348	4e-171	NA18517	ABC	Human_NA18517	ABC7		2005-10-19	ZY	42785700	p14	WGA
		166671_ABC7_000043055200_D4	166671_ABC7_000043055200_D4	F	62247124	http://lgt.igs.umaryland.edu/traces/62247124_166671_ABC7_000043055200_D4.html	http://trace.ncbi.nlm.nih.gov/Traces/trace.cgi?&cmd=retrieve&val=TRACE_NAME='62247124' and TEMPLATE_ID='166671_ABC7_000043055200_D4'&dopt=trace&size=1&seeas=Show	Stenotrophomonas	120	3e-54	NA18517	ABC	Human_NA18517	ABC7		2005-10-14	ZW	42719000	d4	WGA
		168825_ABC8_4_1_000041153400_D8	168825_ABC8_4_1_000041153400_D8	F	68094206	http://lgt.igs.umaryland.edu/traces/68094206_168825_ABC8_4_1_000041153400_D8.html	http://trace.ncbi.nlm.nih.gov/Traces/trace.cgi?&cmd=retrieve&val=TRACE_NAME='68094206' and TEMPLATE_ID='168825_ABC8_4_1_000041153400_D8'&dopt=trace&size=1&seeas=Show	Stenotrophomonas	149	1e-59	NA18507	ABC	Human_NA18507	ABC8_4_1		2006-01-17	AA	43751100	d8	WGA
		172343_ABC9_3_5_000043999800_N5	172343_ABC9_3_5_000043999800_N5	R	74800890	http://lgt.igs.umaryland.edu/traces/74800890_172343_ABC9_3_5_000043999800_N5.html	http://trace.ncbi.nlm.nih.gov/Traces/trace.cgi?&cmd=retrieve&val=TRACE_NAME='74800890' and TEMPLATE_ID='172343_ABC9_3_5_000043999800_N5'&dopt=trace&size=1&seeas=Show	Stenotrophomonas	458	0	NA18956	ABC	Human_NA18956	ABC9_3_5		2006-03-23	ZK	45357000	n5	WGA
		172343_ABC9_3_5_000043990000_J21	172343_ABC9_3_5_000043990000_J21	F	74462428	http://lgt.igs.umaryland.edu/traces/74462428_172343_ABC9_3_5_000043990000_J21.html	http://trace.ncbi.nlm.nih.gov/Traces/trace.cgi?&cmd=retrieve&val=TRACE_NAME='74462428' and TEMPLATE_ID='172343_ABC9_3_5_000043990000_J21'&dopt=trace&size=1&seeas=Show	Stenotrophomonas	167	1e-72	NA18956	ABC	Human_NA18956	ABC9_3_5		2006-03-20	AE	45342700	j21	WGA
		172343_ABC9_3_5_000043323900_O6	172343_ABC9_3_5_000043323900_O6	F	75675013	http://lgt.igs.umaryland.edu/traces/75675013_172343_ABC9_3_5_000043323900_O6.html	http://trace.ncbi.nlm.nih.gov/Traces/trace.cgi?&cmd=retrieve&val=TRACE_NAME='75675013' and TEMPLATE_ID='172343_ABC9_3_5_000043323900_O6'&dopt=trace&size=1&seeas=Show	Stenotrophomonas	168	4e-78	NA18956	ABC	Human_NA18956	ABC9_3_5		2006-03-31	ZU	43335200	o6	WGA
		168825_ABC8_4_1_000041087900_O14	168825_ABC8_4_1_000041087900_O14	F	67157720	http://lgt.igs.umaryland.edu/traces/67157720_168825_ABC8_4_1_000041087900_O14.html	http://trace.ncbi.nlm.nih.gov/Traces/trace.cgi?&cmd=retrieve&val=TRACE_NAME='67157720' and TEMPLATE_ID='168825_ABC8_4_1_000041087900_O14'&dopt=trace&size=1&seeas=Show	Stenotrophomonas	131	1e-53	NA18507	ABC	Human_NA18507	ABC8_4_1		2006-01-03	ZH	45624700	o14	WGA
		168825_ABC8_4_1_000041119200_C18	168825_ABC8_4_1_000041119200_C18	F	67825816	http://lgt.igs.umaryland.edu/traces/67825816_168825_ABC8_4_1_000041119200_C18.html	http://trace.ncbi.nlm.nih.gov/Traces/trace.cgi?&cmd=retrieve&val=TRACE_NAME='67825816' and TEMPLATE_ID='168825_ABC8_4_1_000041119200_C18'&dopt=trace&size=1&seeas=Show	Stenotrophomonas	155	3e-51	NA18507	ABC	Human_NA18507	ABC8_4_1		2006-01-13	AF	44937500	c18	WGA
		173650_ABC10_2_1_000044498000_C13	173650_ABC10_2_1_000044498000_C13	R	77816918	http://lgt.igs.umaryland.edu/traces/77816918_173650_ABC10_2_1_000044498000_C13.html	http://trace.ncbi.nlm.nih.gov/Traces/trace.cgi?&cmd=retrieve&val=TRACE_NAME='77816918' and TEMPLATE_ID='173650_ABC10_2_1_000044498000_C13'&dopt=trace&size=1&seeas=Show	Stenotrophomonas	128	3e-54	NA19240	ABC	Human_NA19240	ABC10_2_1		2006-04-20	ZQ	43646100	c13	WGA
		H_HD-0368B18	ABC18-368B18	F	H_HD-0368B18.b1	http://lgt.igs.umaryland.edu/traces/H_HD-0368B18.b1_H_HD-0368B18.html	http://trace.ncbi.nlm.nih.gov/Traces/trace.cgi?&cmd=retrieve&val=TRACE_NAME='H_HD-0368B18.b1' and TEMPLATE_ID='H_HD-0368B18'&dopt=trace&size=1&seeas=Show	Stenotrophomonas	348	1e-173		WUGSC	H_HD-08-08-11	2181626703	0j008Z	2008-08-08	857	2h07VN	b18	CloneEnd
		HWWHP546974		R	51483813	http://lgt.igs.umaryland.edu/traces/51483813_HWWHP546974.html	http://trace.ncbi.nlm.nih.gov/Traces/trace.cgi?&cmd=retrieve&val=TRACE_NAME='51483813' and TEMPLATE_ID='HWWHP546974'&dopt=trace&size=1&seeas=Show	Stenotrophomonas	202	5e-72		BCM	HWWH	HWWHP	684136	2003-03-29	pan	HWWHP1E546900
		HWWHP130842		F	50580157	http://lgt.igs.umaryland.edu/traces/50580157_HWWHP130842.html	http://trace.ncbi.nlm.nih.gov/Traces/trace.cgi?&cmd=retrieve&val=TRACE_NAME='50580157' and TEMPLATE_ID='HWWHP130842'&dopt=trace&size=1&seeas=Show	Stenotrophomonas	430	1e-162		BCM	HWWH	HWWHP	673398	2003-03-18	mad	HWWHP1D130800
		HWWHP152727		F	50428983	http://lgt.igs.umaryland.edu/traces/50428983_HWWHP152727.html	http://trace.ncbi.nlm.nih.gov/Traces/trace.cgi?&cmd=retrieve&val=TRACE_NAME='50428983' and TEMPLATE_ID='HWWHP152727'&dopt=trace&size=1&seeas=Show	Stenotrophomonas	197	6e-62		BCM	HWWH	HWWHP	671289	2003-03-16	scl	HWWHP1D152700
		HWWHP151455		F	50486970	http://lgt.igs.umaryland.edu/traces/50486970_HWWHP151455.html	http://trace.ncbi.nlm.nih.gov/Traces/trace.cgi?&cmd=retrieve&val=TRACE_NAME='50486970' and TEMPLATE_ID='HWWHP151455'&dopt=trace&size=1&seeas=Show	Stenotrophomonas	185	2e-59		BCM	HWWH	HWWHP	671920	2003-03-17	mad	HWWHP1D151400
		166692_ABC7_000042052400_N9	166692_ABC7_000042052400_N9	R	62821361	http://lgt.igs.umaryland.edu/traces/62821361_166692_ABC7_000042052400_N9.html	http://trace.ncbi.nlm.nih.gov/Traces/trace.cgi?&cmd=retrieve&val=TRACE_NAME='62821361' and TEMPLATE_ID='166692_ABC7_000042052400_N9'&dopt=trace&size=1&seeas=Show	Stenotrophomonas	149	1e-47	NA18517	ABC	Human_NA18517	ABC7		2005-10-25	ZY	43128500	n9	WGA
		166640_ABC7_000042757900_G12	166640_ABC7_000042757900_G12	R	62731644	http://lgt.igs.umaryland.edu/traces/62731644_166640_ABC7_000042757900_G12.html	http://trace.ncbi.nlm.nih.gov/Traces/trace.cgi?&cmd=retrieve&val=TRACE_NAME='62731644' and TEMPLATE_ID='166640_ABC7_000042757900_G12'&dopt=trace&size=1&seeas=Show	Stenotrophomonas	416	5e-170	NA18517	ABC	Human_NA18517	ABC7		2005-10-23	ZT	42799100	g12	WGA
		166540_ABC7_000000619422_O6	166540_ABC7_000000619422_O6	R	62109920	http://lgt.igs.umaryland.edu/traces/62109920_166540_ABC7_000000619422_O6.html	http://trace.ncbi.nlm.nih.gov/Traces/trace.cgi?&cmd=retrieve&val=TRACE_NAME='62109920' and TEMPLATE_ID='166540_ABC7_000000619422_O6'&dopt=trace&size=1&seeas=Show	Stenotrophomonas	158	3e-60	NA18517	ABC	Human_NA18517	ABC7		2005-10-11	ZL	569722	o6	WGA
		166791_ABC7_000043073200_K16	166791_ABC7_000043073200_K16	R	62569736	http://lgt.igs.umaryland.edu/traces/62569736_166791_ABC7_000043073200_K16.html	http://trace.ncbi.nlm.nih.gov/Traces/trace.cgi?&cmd=retrieve&val=TRACE_NAME='62569736' and TEMPLATE_ID='166791_ABC7_000043073200_K16'&dopt=trace&size=1&seeas=Show	Stenotrophomonas	107	7e-49	NA18517	ABC	Human_NA18517	ABC7		2005-10-19	ZC	42785400	k16	WGA
		166791_ABC7_000043072800_K8	166791_ABC7_000043072800_K8	F	62566864	http://lgt.igs.umaryland.edu/traces/62566864_166791_ABC7_000043072800_K8.html	http://trace.ncbi.nlm.nih.gov/Traces/trace.cgi?&cmd=retrieve&val=TRACE_NAME='62566864' and TEMPLATE_ID='166791_ABC7_000043072800_K8'&dopt=trace&size=1&seeas=Show	Stenotrophomonas	118	8e-58	NA18517	ABC	Human_NA18517	ABC7		2005-10-20	ZS	42787300	k8	WGA
		S9A_2-760l06		R	S9A_2-760l06.q1k	http://lgt.igs.umaryland.edu/traces/S9A_2-760l06.q1k_S9A_2-760l06.html	http://trace.ncbi.nlm.nih.gov/Traces/trace.cgi?&cmd=retrieve&val=TRACE_NAME='S9A_2-760l06.q1k' and TEMPLATE_ID='S9A_2-760l06'&dopt=trace&size=1&seeas=Show	Stenotrophomonas	239	1e-103	NA11321	SC	Chr_9-12_11321_2	63683		2003-08-10		S9A_2-760	l06	SNP
		170215_ABC9_3_2_000041286400_B4	170215_ABC9_3_2_000041286400_B4	R	70684861	http://lgt.igs.umaryland.edu/traces/70684861_170215_ABC9_3_2_000041286400_B4.html	http://trace.ncbi.nlm.nih.gov/Traces/trace.cgi?&cmd=retrieve&val=TRACE_NAME='70684861' and TEMPLATE_ID='170215_ABC9_3_2_000041286400_B4'&dopt=trace&size=1&seeas=Show	Stenotrophomonas	285	1e-66	NA18956	ABC	Human_NA18956	ABC9_3_2		2006-02-14	ZQ	45105600	b4	WGA
		170215_ABC9_3_2_000041286600_D3	170215_ABC9_3_2_000041286600_D3	R	70662129	http://lgt.igs.umaryland.edu/traces/70662129_170215_ABC9_3_2_000041286600_D3.html	http://trace.ncbi.nlm.nih.gov/Traces/trace.cgi?&cmd=retrieve&val=TRACE_NAME='70662129' and TEMPLATE_ID='170215_ABC9_3_2_000041286600_D3'&dopt=trace&size=1&seeas=Show	Stenotrophomonas	438	2e-172	NA18956	ABC	Human_NA18956	ABC9_3_2		2006-02-13	ZQ	45106600	d3	WGA
		170215_ABC9_3_2_000045917900_L6	170215_ABC9_3_2_000045917900_L6	R	70758278	http://lgt.igs.umaryland.edu/traces/70758278_170215_ABC9_3_2_000045917900_L6.html	http://trace.ncbi.nlm.nih.gov/Traces/trace.cgi?&cmd=retrieve&val=TRACE_NAME='70758278' and TEMPLATE_ID='170215_ABC9_3_2_000045917900_L6'&dopt=trace&size=1&seeas=Show	Stenotrophomonas	286	2e-67	NA18956	ABC	Human_NA18956	ABC9_3_2		2006-02-16	ZD	45118500	l6	WGA
		170215_ABC9_3_2_000043837600_H2	170215_ABC9_3_2_000043837600_H2	R	71278808	http://lgt.igs.umaryland.edu/traces/71278808_170215_ABC9_3_2_000043837600_H2.html	http://trace.ncbi.nlm.nih.gov/Traces/trace.cgi?&cmd=retrieve&val=TRACE_NAME='71278808' and TEMPLATE_ID='170215_ABC9_3_2_000043837600_H2'&dopt=trace&size=1&seeas=Show	Stenotrophomonas	122	4e-41	NA18956	ABC	Human_NA18956	ABC9_3_2		2006-02-20	ZV	45985800	h2	WGA
		170215_ABC9_3_2_000000798921_G14	170215_ABC9_3_2_000000798921_G14	R	68900964	http://lgt.igs.umaryland.edu/traces/68900964_170215_ABC9_3_2_000000798921_G14.html	http://trace.ncbi.nlm.nih.gov/Traces/trace.cgi?&cmd=retrieve&val=TRACE_NAME='68900964' and TEMPLATE_ID='170215_ABC9_3_2_000000798921_G14'&dopt=trace&size=1&seeas=Show	Stenotrophomonas	382	2e-153	NA18956	ABC	Human_NA18956	ABC9_3_2		2006-01-27	AD	800121	g14	WGA
		HMBDP0827	RP5-1087L12	R	39412398	http://lgt.igs.umaryland.edu/traces/39412398_HMBDP0827.html	http://trace.ncbi.nlm.nih.gov/Traces/trace.cgi?&cmd=retrieve&val=TRACE_NAME='39412398' and TEMPLATE_ID='HMBDP0827'&dopt=trace&size=1&seeas=Show	Stenotrophomonas	487	0		BCM	HMBD	HMBDP	540206	2002-10-28	wis	HMBDP1E0800
		HWWIP244694		F	56515442	http://lgt.igs.umaryland.edu/traces/56515442_HWWIP244694.html	http://trace.ncbi.nlm.nih.gov/Traces/trace.cgi?&cmd=retrieve&val=TRACE_NAME='56515442' and TEMPLATE_ID='HWWIP244694'&dopt=trace&size=1&seeas=Show	Stenotrophomonas	435	6e-173		BCM	HWWI	HWWIP	747549	2003-05-24	ala	HWWIP1D244600
		HWWIP234843		R	56514598	http://lgt.igs.umaryland.edu/traces/56514598_HWWIP234843.html	http://trace.ncbi.nlm.nih.gov/Traces/trace.cgi?&cmd=retrieve&val=TRACE_NAME='56514598' and TEMPLATE_ID='HWWIP234843'&dopt=trace&size=1&seeas=Show	Stenotrophomonas	266	1e-81		BCM	HWWI	HWWIP	747540	2003-05-24	ina	HWWIP1E234800
		HWWIP92463		R	55949433	http://lgt.igs.umaryland.edu/traces/55949433_HWWIP92463.html	http://trace.ncbi.nlm.nih.gov/Traces/trace.cgi?&cmd=retrieve&val=TRACE_NAME='55949433' and TEMPLATE_ID='HWWIP92463'&dopt=trace&size=1&seeas=Show	Stenotrophomonas	120	7e-50		BCM	HWWI	HWWIP	740848	2003-05-18	bol	HWWIP1E92400
		HWWIP263106		R	56502462	http://lgt.igs.umaryland.edu/traces/56502462_HWWIP263106.html	http://trace.ncbi.nlm.nih.gov/Traces/trace.cgi?&cmd=retrieve&val=TRACE_NAME='56502462' and TEMPLATE_ID='HWWIP263106'&dopt=trace&size=1&seeas=Show	Stenotrophomonas	114	2e-43		BCM	HWWI	HWWIP	747413	2003-05-24	ind	HWWIP1E263100
		HWWIP77284		R	55958363	http://lgt.igs.umaryland.edu/traces/55958363_HWWIP77284.html	http://trace.ncbi.nlm.nih.gov/Traces/trace.cgi?&cmd=retrieve&val=TRACE_NAME='55958363' and TEMPLATE_ID='HWWIP77284'&dopt=trace&size=1&seeas=Show	Stenotrophomonas	292	4e-76		BCM	HWWI	HWWIP	740942	2003-05-18	kwt	HWWIP1E77200
		HWWIP277444		R	56562929	http://lgt.igs.umaryland.edu/traces/56562929_HWWIP277444.html	http://trace.ncbi.nlm.nih.gov/Traces/trace.cgi?&cmd=retrieve&val=TRACE_NAME='56562929' and TEMPLATE_ID='HWWIP277444'&dopt=trace&size=1&seeas=Show	Stenotrophomonas	284	4e-73		BCM	HWWI	HWWIP	748052	2003-05-25	nor	HWWIP1E277400
	Streptococcus
		H_HD-1114K17	ABC18-1114K17	R	H_HD-1114K17.g1	http://lgt.igs.umaryland.edu/traces/H_HD-1114K17.g1_H_HD-1114K17.html	http://trace.ncbi.nlm.nih.gov/Traces/trace.cgi?&cmd=retrieve&val=TRACE_NAME='H_HD-1114K17.g1' and TEMPLATE_ID='H_HD-1114K17'&dopt=trace&size=1&seeas=Show	Streptococcus	135	2e-46	NA10847	WUGSC	H_HD-08-02-14	2181626703	0j00gs	2008-02-13	889	2h099r	k17	CloneEnd
	Thauera,Thiomonas
		170143_ABC8_4_1_000041167800_I20	170143_ABC8_4_1_000041167800_I20	R	68473367	http://lgt.igs.umaryland.edu/traces/68473367_170143_ABC8_4_1_000041167800_I20.html	http://trace.ncbi.nlm.nih.gov/Traces/trace.cgi?&cmd=retrieve&val=TRACE_NAME='68473367' and TEMPLATE_ID='170143_ABC8_4_1_000041167800_I20'&dopt=trace&size=1&seeas=Show	Thauera,Thiomonas	127	1e-53	NA18507	ABC	Human_NA18507	ABC8_4_1		2006-01-22	ZS	45000300	i20	WGA
	Thioalkalivibrio
		166083_ABC8_000042662400_E15	166083_ABC8_000042662400_E15	R	61682572	http://lgt.igs.umaryland.edu/traces/61682572_166083_ABC8_000042662400_E15.html	http://trace.ncbi.nlm.nih.gov/Traces/trace.cgi?&cmd=retrieve&val=TRACE_NAME='61682572' and TEMPLATE_ID='166083_ABC8_000042662400_E15'&dopt=trace&size=1&seeas=Show	Thioalkalivibrio	192	6e-71	NA18507	ABC	Human_NA18507	ABC8		2005-10-03	ZK	42680000	e15	WGA
	Thiomonas
		172343_ABC9_3_5_000043963900_J10	172343_ABC9_3_5_000043963900_J10	F	74076357	http://lgt.igs.umaryland.edu/traces/74076357_172343_ABC9_3_5_000043963900_J10.html	http://trace.ncbi.nlm.nih.gov/Traces/trace.cgi?&cmd=retrieve&val=TRACE_NAME='74076357' and TEMPLATE_ID='172343_ABC9_3_5_000043963900_J10'&dopt=trace&size=1&seeas=Show	Thiomonas	257	2e-138	NA18956	ABC	Human_NA18956	ABC9_3_5		2006-03-16	ZP	45286800	j10	WGA
	Tolumonas
		164507_HUMAN_NA18517_FOSMID-016_L3	ABC7_000040620000_L3	F	57206348	http://lgt.igs.umaryland.edu/traces/57206348_164507_HUMAN_NA18517_FOSMID-016_L3.html	http://trace.ncbi.nlm.nih.gov/Traces/trace.cgi?&cmd=retrieve&val=TRACE_NAME='57206348' and TEMPLATE_ID='164507_HUMAN_NA18517_FOSMID-016_L3'&dopt=trace&size=1&seeas=Show	Tolumonas	272	2e-104	NA18517	ABC	Human_NA18517	Human_NA18517		2005-08-10	AC	41830800	l3	WGA
		165431_ABC7_000042412100_K20	165431_ABC7_000042412100_K20	R	58988082	http://lgt.igs.umaryland.edu/traces/58988082_165431_ABC7_000042412100_K20.html	http://trace.ncbi.nlm.nih.gov/Traces/trace.cgi?&cmd=retrieve&val=TRACE_NAME='58988082' and TEMPLATE_ID='165431_ABC7_000042412100_K20'&dopt=trace&size=1&seeas=Show	Tolumonas	177	5e-93	NA18517	ABC	Human_NA18517	ABC7		2005-09-06	ZK	41864200	k20	WGA
	uncultured
		HWWIP111537		R	56087212	http://lgt.igs.umaryland.edu/traces/56087212_HWWIP111537.html	http://trace.ncbi.nlm.nih.gov/Traces/trace.cgi?&cmd=retrieve&val=TRACE_NAME='56087212' and TEMPLATE_ID='HWWIP111537'&dopt=trace&size=1&seeas=Show	uncultured	309	4e-150		BCM	HWWI	HWWIP	742352	2003-05-20	sam	HWWIP1E111500
		H_GD-123E11	CH17-123E11	F	H_GD-123E11b.b1	http://lgt.igs.umaryland.edu/traces/H_GD-123E11b.b1_H_GD-123E11.html	http://trace.ncbi.nlm.nih.gov/Traces/trace.cgi?&cmd=retrieve&val=TRACE_NAME='H_GD-123E11b.b1' and TEMPLATE_ID='H_GD-123E11'&dopt=trace&size=1&seeas=Show	uncultured	217	6e-74		WUGSC	H_GD-123E11	1650267650	0j008H	2007-06-05	839	2k2726	e11	CloneEnd
	Variovorax
		1201894_ABC11_2_1_000049404500_C12	1201894_ABC11_2_1_000049404500_C12	R	96381510	http://lgt.igs.umaryland.edu/traces/96381510_1201894_ABC11_2_1_000049404500_C12.html	http://trace.ncbi.nlm.nih.gov/Traces/trace.cgi?&cmd=retrieve&val=TRACE_NAME='96381510' and TEMPLATE_ID='1201894_ABC11_2_1_000049404500_C12'&dopt=trace&size=1&seeas=Show	Variovorax	111	2e-34	NA18555	ABC	Human_NA18555	ABC11_2_1		2006-11-02	ZM	49433000	c12	WGA
	Verminephrobacter
		168825_ABC8_4_1_000000788822_J1	168825_ABC8_4_1_000000788822_J1	F	67031245	http://lgt.igs.umaryland.edu/traces/67031245_168825_ABC8_4_1_000000788822_J1.html	http://trace.ncbi.nlm.nih.gov/Traces/trace.cgi?&cmd=retrieve&val=TRACE_NAME='67031245' and TEMPLATE_ID='168825_ABC8_4_1_000000788822_J1'&dopt=trace&size=1&seeas=Show	Verminephrobacter	238	1e-74	NA18507	ABC	Human_NA18507	ABC8_4_1		2005-12-31	ZQ	820222	j1	WGA
		G248P801326C7		F	G248P801326FC7.T0	http://lgt.igs.umaryland.edu/traces/G248P801326FC7.T0_G248P801326C7.html	http://trace.ncbi.nlm.nih.gov/Traces/trace.cgi?&cmd=retrieve&val=TRACE_NAME='G248P801326FC7.T0' and TEMPLATE_ID='G248P801326C7'&dopt=trace&size=1&seeas=Show	Verminephrobacter	285	4e-81		WIBR	G248					G248P801326	c7	WGS
	Xanthomonas
		166377_ABC7_000000614322_B21	166377_ABC7_000000614322_B21	F	61967561	http://lgt.igs.umaryland.edu/traces/61967561_166377_ABC7_000000614322_B21.html	http://trace.ncbi.nlm.nih.gov/Traces/trace.cgi?&cmd=retrieve&val=TRACE_NAME='61967561' and TEMPLATE_ID='166377_ABC7_000000614322_B21'&dopt=trace&size=1&seeas=Show	Xanthomonas	107	1e-41	NA18517	ABC	Human_NA18517	ABC7		2005-10-08	ZW	543122	b21	WGA
		166671_ABC7_000043051500_N13	166671_ABC7_000043051500_N13	F	62252329	http://lgt.igs.umaryland.edu/traces/62252329_166671_ABC7_000043051500_N13.html	http://trace.ncbi.nlm.nih.gov/Traces/trace.cgi?&cmd=retrieve&val=TRACE_NAME='62252329' and TEMPLATE_ID='166671_ABC7_000043051500_N13'&dopt=trace&size=1&seeas=Show	Xanthomonas	105	5e-50	NA18517	ABC	Human_NA18517	ABC7		2005-10-13	ZR	42713000	n13	WGA
		165972_ABC8_000042557700_M2	165972_ABC8_000042557700_M2	R	61392765	http://lgt.igs.umaryland.edu/traces/61392765_165972_ABC8_000042557700_M2.html	http://trace.ncbi.nlm.nih.gov/Traces/trace.cgi?&cmd=retrieve&val=TRACE_NAME='61392765' and TEMPLATE_ID='165972_ABC8_000042557700_M2'&dopt=trace&size=1&seeas=Show	Xanthomonas	107	3e-51	NA18507	ABC	Human_NA18507	ABC8		2005-09-29	ZF	42597300	m2	WGA
		ABC7_000040256600_G19	ABC7_000040256600_G19	F	59515546	http://lgt.igs.umaryland.edu/traces/59515546_ABC7_000040256600_G19.html	http://trace.ncbi.nlm.nih.gov/Traces/trace.cgi?&cmd=retrieve&val=TRACE_NAME='59515546' and TEMPLATE_ID='ABC7_000040256600_G19'&dopt=trace&size=1&seeas=Show	Xanthomonas	177	9e-79	NA18517	ABC	Human_NA18517	ABC7		2005-09-13	ZP	42835200	g19	WGA
