# Supplementary material for: Bacteria-Human Somatic Cell Lateral Gene Transfer Is Enriched in Cancer Samples
Source: PLoS Comput Biol. 2013 Jun 20;9(6):e1003107. doi: 10.1371/journal.pcbi.1003107 (PMC3688693; doi:10.1371/journal.pcbi.1003107)
Supplement: Table S3 — Read pairs from the 1000 Genomes project that support LGT in the somatic human genome. The read pairs listed here have one read that matches human sequences and one read that matches bacteria sequences. Data deposited in various fields in the Sequence Read Archive are presented along with a summary of the results generated. (XLSX) [file pcbi.1003107.s013.xlsx]

## Sheet: SuppTable1000Genomes
Human read OTU (based on Lowest Comman Ancestor)	Human read best BLAST hit length	Human read best BLAST e-value	Average coverage over this read in the human	Bacterial read OTU (based on Lowest Common Ancestor)	Bacterial read best BLAST hit length	bacterial read best BLAST e-value	READ_ID	RUN_ID	EXPERIMENT_ID	SAMPLE_ID	STUDY_ID	SUBMISSION_ID	STUDY_NAME	SAMPLE_NAME	LIBRARY_NAME	RUN_NAME	POPULATION	SUBMISSION_DATE	BASE_COUNT	READ_COUNT	LIBRARY_STRATEGY	ANALYSIS_GROUP	Is the sample from blood	INSTRUMENT_PLATFORM	FASTQ_FILE	CENTER_NAME	LIBRARY_LAYOUT	INSTRUMENT_MODEL	LIBRARY_SOURCE	INSERT_SIZE
cellular organisms;Eukaryota;Opisthokonta;Metazoa;Eumetazoa;Bilateria;Coelomata;Deuterostomia;Chordata;Craniata;Vertebrata;Gnathostomata;Teleostomi;Euteleostomi;Sarcopterygii;Tetrapoda;Amniota;Mammalia;Theria;Eutheria;Euarchontoglires;Primates;Haplorrhini;Simiiformes;Catarrhini;Hominoidea;Hominidae;Homininae;Homo;Homo sapiens	51	3e-19	2	cellular organisms;Bacteria;Proteobacteria;Gammaproteobacteria;Enterobacteriales;Enterobacteriaceae	51	3e-19	ERR006347.sra.1706653	ERR006347	ERX001127	SRS000639	SRP000547	ERA000138	1000 Genomes CEPH (Utah residents with ancestry from Northern and Western Europe) population sequencing	NA12830	NA12830.22	1000G-mpimg-090515-4	CEU	2009-10-06	5770701	113151	WGS	low coverage	no	ILLUMINA	data/NA12830/sequence_read/ERR006347.filt.fastq.gz	MPIMG	PAIRED	Solexa 1G Genome Analyzer	GENOMIC	184
other sequences;artificial sequences;vectors;Human artificial chromosome vector 21HAC4	37	4e-11	1	cellular organisms;Bacteria;Actinobacteria;Actinobacteria;Actinobacteridae;Actinomycetales;Propionibacterineae;Propionibacteriaceae;Propionibacterium;Propionibacterium acnes	37	4e-11	ERR000798.sra.874526	ERR000798	ERX000069	SRS000060	SRP000031	ERA000024	1000Genomes Project Pilot 1	NA12043	g1k-sc-NA12043-CEU-1	IL21_973_6	CEU	2008-08-12	3497869	94537	WGS	low coverage	no	ILLUMINA	data/NA12043/sequence_read/ERR000798.filt.fastq.gz	SC	PAIRED	Solexa 1G Genome Analyzer	GENOMIC	175
cellular organisms;Eukaryota;Opisthokonta;Metazoa;Eumetazoa;Bilateria;Coelomata;Deuterostomia;Chordata;Craniata;Vertebrata;Gnathostomata;Teleostomi;Euteleostomi;Sarcopterygii;Tetrapoda;Amniota;Mammalia;Theria;Eutheria;Euarchontoglires;Primates;Haplorrhini;Simiiformes;Catarrhini;Hominoidea;Hominidae;Homininae;Homo;Homo sapiens	51	3e-19	2	cellular organisms;Bacteria;Actinobacteria;Actinobacteria;Actinobacteridae;Actinomycetales;Propionibacterineae;Propionibacteriaceae;Propionibacterium;Propionibacterium acnes	51	3e-19	ERR006345.sra.3397786	ERR006345	ERX001127	SRS000639	SRP000547	ERA000138	1000 Genomes CEPH (Utah residents with ancestry from Northern and Western Europe) population sequencing	NA12830	NA12830.22	1000G-mpimg-090515-1	CEU	2009-10-06	20819118	408218	WGS	low coverage	no	ILLUMINA	data/NA12830/sequence_read/ERR006345.filt.fastq.gz	MPIMG	PAIRED	Solexa 1G Genome Analyzer	GENOMIC	184
cellular organisms;Eukaryota;Opisthokonta;Metazoa;Eumetazoa;Bilateria;Coelomata;Deuterostomia;Chordata;Craniata;Vertebrata;Gnathostomata;Teleostomi;Euteleostomi;Sarcopterygii;Tetrapoda;Amniota;Mammalia;Theria;Eutheria;Euarchontoglires;Primates;Haplorrhini;Simiiformes;Catarrhini;Hominoidea;Hominidae;Homininae;Homo;Homo sapiens	51	3e-19	1	cellular organisms;Bacteria;Proteobacteria;Gammaproteobacteria;Xanthomonadales;Xanthomonadaceae;Stenotrophomonas;Stenotrophomonas maltophilia group;Stenotrophomonas maltophilia;Stenotrophomonas maltophilia R551-3	51	5e-12	ERR006347.sra.9308245	ERR006347	ERX001127	SRS000639	SRP000547	ERA000138	1000 Genomes CEPH (Utah residents with ancestry from Northern and Western Europe) population sequencing	NA12830	NA12830.22	1000G-mpimg-090515-4	CEU	2009-10-06	5770701	113151	WGS	low coverage	no	ILLUMINA	data/NA12830/sequence_read/ERR006347.filt.fastq.gz	MPIMG	PAIRED	Solexa 1G Genome Analyzer	GENOMIC	184
cellular organisms;Eukaryota;Opisthokonta;Metazoa;Eumetazoa;Bilateria;Coelomata;Deuterostomia;Chordata;Craniata;Vertebrata;Gnathostomata;Teleostomi;Euteleostomi;Sarcopterygii;Tetrapoda;Amniota;Mammalia;Theria;Eutheria;Euarchontoglires;Primates;Haplorrhini;Simiiformes;Catarrhini;Hominoidea;Hominidae;Homininae;Homo;Homo sapiens	51	3e-19	1	cellular organisms;Bacteria;Proteobacteria;Gammaproteobacteria;Xanthomonadales;Xanthomonadaceae;Stenotrophomonas;Stenotrophomonas maltophilia group;Stenotrophomonas maltophilia;Stenotrophomonas maltophilia JV3	51	2e-14	ERR006345.sra.7127236	ERR006345	ERX001127	SRS000639	SRP000547	ERA000138	1000 Genomes CEPH (Utah residents with ancestry from Northern and Western Europe) population sequencing	NA12830	NA12830.22	1000G-mpimg-090515-1	CEU	2009-10-06	20819118	408218	WGS	low coverage	no	ILLUMINA	data/NA12830/sequence_read/ERR006345.filt.fastq.gz	MPIMG	PAIRED	Solexa 1G Genome Analyzer	GENOMIC	184
cellular organisms;Eukaryota;Opisthokonta;Metazoa;Eumetazoa;Bilateria;Coelomata;Deuterostomia;Chordata;Craniata;Vertebrata;Gnathostomata;Teleostomi;Euteleostomi;Sarcopterygii;Tetrapoda;Amniota;Mammalia;Theria;Eutheria;Euarchontoglires;Primates;Haplorrhini;Simiiformes;Catarrhini;Hominoidea;Hominidae;Homininae	51	8e-17	1	cellular organisms;Bacteria;Proteobacteria;Betaproteobacteria;Burkholderiales;Burkholderiaceae;Burkholderia	51	2e-14	ERR006345.sra.479601	ERR006345	ERX001127	SRS000639	SRP000547	ERA000138	1000 Genomes CEPH (Utah residents with ancestry from Northern and Western Europe) population sequencing	NA12830	NA12830.22	1000G-mpimg-090515-1	CEU	2009-10-06	20819118	408218	WGS	low coverage	no	ILLUMINA	data/NA12830/sequence_read/ERR006345.filt.fastq.gz	MPIMG	PAIRED	Solexa 1G Genome Analyzer	GENOMIC	184
cellular organisms;Eukaryota;Opisthokonta;Metazoa;Eumetazoa;Bilateria;Coelomata;Deuterostomia;Chordata;Craniata;Vertebrata;Gnathostomata;Teleostomi;Euteleostomi;Sarcopterygii;Tetrapoda;Amniota;Mammalia;Theria;Eutheria;Euarchontoglires;Primates;Haplorrhini;Simiiformes;Catarrhini;Hominoidea;Hominidae;Homininae;Homo;Homo sapiens	51	3e-19	1	cellular organisms;Bacteria;Proteobacteria;Gammaproteobacteria;Xanthomonadales;Xanthomonadaceae;Stenotrophomonas;Stenotrophomonas maltophilia group;Stenotrophomonas maltophilia	47	2e-14	ERR006347.sra.2575826	ERR006347	ERX001127	SRS000639	SRP000547	ERA000138	1000 Genomes CEPH (Utah residents with ancestry from Northern and Western Europe) population sequencing	NA12830	NA12830.22	1000G-mpimg-090515-4	CEU	2009-10-06	5770701	113151	WGS	low coverage	no	ILLUMINA	data/NA12830/sequence_read/ERR006347.filt.fastq.gz	MPIMG	PAIRED	Solexa 1G Genome Analyzer	GENOMIC	184
cellular organisms;Eukaryota;Opisthokonta;Metazoa;Eumetazoa;Bilateria;Coelomata;Deuterostomia;Chordata;Craniata;Vertebrata;Gnathostomata;Teleostomi;Euteleostomi;Sarcopterygii;Tetrapoda;Amniota;Mammalia;Theria;Eutheria;Euarchontoglires;Primates;Haplorrhini;Simiiformes;Catarrhini;Hominoidea;Hominidae;Homininae;Homo;Homo sapiens	51	3e-19	1	cellular organisms;Bacteria;Actinobacteria;Actinobacteria;Actinobacteridae;Actinomycetales;Propionibacterineae;Propionibacteriaceae;Propionibacterium;Propionibacterium acnes	51	3e-19	ERR006345.sra.7469325	ERR006345	ERX001127	SRS000639	SRP000547	ERA000138	1000 Genomes CEPH (Utah residents with ancestry from Northern and Western Europe) population sequencing	NA12830	NA12830.22	1000G-mpimg-090515-1	CEU	2009-10-06	20819118	408218	WGS	low coverage	no	ILLUMINA	data/NA12830/sequence_read/ERR006345.filt.fastq.gz	MPIMG	PAIRED	Solexa 1G Genome Analyzer	GENOMIC	184
cellular organisms;Eukaryota;Opisthokonta;Metazoa;Eumetazoa;Bilateria;Coelomata;Deuterostomia;Chordata;Craniata;Vertebrata;Gnathostomata;Teleostomi;Euteleostomi;Sarcopterygii;Tetrapoda;Amniota;Mammalia;Theria;Eutheria;Euarchontoglires;Primates;Haplorrhini;Simiiformes;Catarrhini;Hominoidea;Hominidae;Homininae;Homo;Homo sapiens	51	3e-19	1	cellular organisms;Bacteria;Proteobacteria;Gammaproteobacteria;Enterobacteriales;Enterobacteriaceae;Serratia	51	3e-19	ERR006347.sra.11519200	ERR006347	ERX001127	SRS000639	SRP000547	ERA000138	1000 Genomes CEPH (Utah residents with ancestry from Northern and Western Europe) population sequencing	NA12830	NA12830.22	1000G-mpimg-090515-4	CEU	2009-10-06	5770701	113151	WGS	low coverage	no	ILLUMINA	data/NA12830/sequence_read/ERR006347.filt.fastq.gz	MPIMG	PAIRED	Solexa 1G Genome Analyzer	GENOMIC	184
cellular organisms;Eukaryota;Opisthokonta;Metazoa;Eumetazoa;Bilateria;Coelomata;Deuterostomia;Chordata;Craniata;Vertebrata;Gnathostomata;Teleostomi;Euteleostomi;Sarcopterygii;Tetrapoda;Amniota;Mammalia;Theria;Eutheria;Euarchontoglires;Primates;Haplorrhini;Simiiformes;Catarrhini;Hominoidea;Hominidae;Homininae;Homo;Homo sapiens	51	3e-19	1	cellular organisms;Bacteria;Proteobacteria	51	5e-12	ERR006347.sra.7184362	ERR006347	ERX001127	SRS000639	SRP000547	ERA000138	1000 Genomes CEPH (Utah residents with ancestry from Northern and Western Europe) population sequencing	NA12830	NA12830.22	1000G-mpimg-090515-4	CEU	2009-10-06	5770701	113151	WGS	low coverage	no	ILLUMINA	data/NA12830/sequence_read/ERR006347.filt.fastq.gz	MPIMG	PAIRED	Solexa 1G Genome Analyzer	GENOMIC	184
cellular organisms;Eukaryota;Opisthokonta;Metazoa;Eumetazoa;Bilateria;Coelomata;Deuterostomia;Chordata;Craniata;Vertebrata;Gnathostomata;Teleostomi;Euteleostomi;Sarcopterygii;Tetrapoda;Amniota;Mammalia;Theria;Eutheria;Euarchontoglires;Primates;Haplorrhini;Simiiformes;Catarrhini;Hominoidea;Hominidae;Homininae;Homo;Homo sapiens	51	3e-19	1	cellular organisms;Bacteria;Proteobacteria;Gammaproteobacteria;Xanthomonadales;Xanthomonadaceae;Stenotrophomonas;Stenotrophomonas maltophilia group;Stenotrophomonas maltophilia	51	8e-17	ERR006345.sra.5168689	ERR006345	ERX001127	SRS000639	SRP000547	ERA000138	1000 Genomes CEPH (Utah residents with ancestry from Northern and Western Europe) population sequencing	NA12830	NA12830.22	1000G-mpimg-090515-1	CEU	2009-10-06	20819118	408218	WGS	low coverage	no	ILLUMINA	data/NA12830/sequence_read/ERR006345.filt.fastq.gz	MPIMG	PAIRED	Solexa 1G Genome Analyzer	GENOMIC	184
cellular organisms;Eukaryota;Opisthokonta;Metazoa;Eumetazoa;Bilateria;Coelomata;Deuterostomia;Chordata;Craniata;Vertebrata;Gnathostomata;Teleostomi;Euteleostomi;Sarcopterygii;Tetrapoda;Amniota;Mammalia;Theria;Eutheria;Euarchontoglires;Primates;Haplorrhini;Simiiformes;Catarrhini;Hominoidea;Hominidae;Homininae;Homo;Homo sapiens	51	3e-19	1	cellular organisms;Bacteria;Proteobacteria;Gammaproteobacteria;Xanthomonadales;Xanthomonadaceae;Stenotrophomonas;Stenotrophomonas maltophilia group;Stenotrophomonas maltophilia;Stenotrophomonas maltophilia R551-3	49	1e-15	ERR006347.sra.9050213	ERR006347	ERX001127	SRS000639	SRP000547	ERA000138	1000 Genomes CEPH (Utah residents with ancestry from Northern and Western Europe) population sequencing	NA12830	NA12830.22	1000G-mpimg-090515-4	CEU	2009-10-06	5770701	113151	WGS	low coverage	no	ILLUMINA	data/NA12830/sequence_read/ERR006347.filt.fastq.gz	MPIMG	PAIRED	Solexa 1G Genome Analyzer	GENOMIC	184
cellular organisms;Eukaryota;Opisthokonta;Metazoa;Eumetazoa;Bilateria;Coelomata;Deuterostomia;Chordata;Craniata;Vertebrata;Gnathostomata;Teleostomi;Euteleostomi;Sarcopterygii;Tetrapoda;Amniota;Mammalia;Theria;Eutheria;Euarchontoglires;Primates;Haplorrhini;Simiiformes;Catarrhini;Hominoidea;Hominidae;Homininae;Homo;Homo sapiens	51	8e-17	1	cellular organisms;Bacteria;Proteobacteria;Gammaproteobacteria;Xanthomonadales;Xanthomonadaceae;Stenotrophomonas;Stenotrophomonas maltophilia group;Stenotrophomonas maltophilia	51	8e-17	ERR006347.sra.9046629	ERR006347	ERX001127	SRS000639	SRP000547	ERA000138	1000 Genomes CEPH (Utah residents with ancestry from Northern and Western Europe) population sequencing	NA12830	NA12830.22	1000G-mpimg-090515-4	CEU	2009-10-06	5770701	113151	WGS	low coverage	no	ILLUMINA	data/NA12830/sequence_read/ERR006347.filt.fastq.gz	MPIMG	PAIRED	Solexa 1G Genome Analyzer	GENOMIC	184
cellular organisms;Eukaryota;Opisthokonta;Metazoa;Eumetazoa;Bilateria;Coelomata;Deuterostomia;Chordata;Craniata;Vertebrata;Gnathostomata;Teleostomi;Euteleostomi;Sarcopterygii;Tetrapoda;Amniota;Mammalia;Theria;Eutheria;Euarchontoglires;Primates;Haplorrhini;Simiiformes;Catarrhini;Hominoidea;Hominidae;Homininae;Homo;Homo sapiens	51	3e-19	1	cellular organisms;Bacteria;Proteobacteria;Gammaproteobacteria;Enterobacteriales;Enterobacteriaceae;Serratia;Serratia marcescens	47	8e-17	ERR006347.sra.6653161	ERR006347	ERX001127	SRS000639	SRP000547	ERA000138	1000 Genomes CEPH (Utah residents with ancestry from Northern and Western Europe) population sequencing	NA12830	NA12830.22	1000G-mpimg-090515-4	CEU	2009-10-06	5770701	113151	WGS	low coverage	no	ILLUMINA	data/NA12830/sequence_read/ERR006347.filt.fastq.gz	MPIMG	PAIRED	Solexa 1G Genome Analyzer	GENOMIC	184
cellular organisms;Eukaryota;Opisthokonta;Metazoa;Eumetazoa;Bilateria;Coelomata;Deuterostomia;Chordata;Craniata;Vertebrata;Gnathostomata;Teleostomi;Euteleostomi;Sarcopterygii;Tetrapoda;Amniota;Mammalia;Theria;Eutheria;Euarchontoglires;Primates;Haplorrhini;Simiiformes	48	1e-12	1	cellular organisms;Bacteria;Proteobacteria;Gammaproteobacteria;Xanthomonadales;Xanthomonadaceae;Stenotrophomonas;Stenotrophomonas maltophilia group;Stenotrophomonas maltophilia	46	8e-14	ERR006347.sra.11495492	ERR006347	ERX001127	SRS000639	SRP000547	ERA000138	1000 Genomes CEPH (Utah residents with ancestry from Northern and Western Europe) population sequencing	NA12830	NA12830.22	1000G-mpimg-090515-4	CEU	2009-10-06	5770701	113151	WGS	low coverage	no	ILLUMINA	data/NA12830/sequence_read/ERR006347.filt.fastq.gz	MPIMG	PAIRED	Solexa 1G Genome Analyzer	GENOMIC	184
cellular organisms;Eukaryota;Opisthokonta;Metazoa;Eumetazoa;Bilateria;Coelomata;Deuterostomia;Chordata;Craniata;Vertebrata;Gnathostomata;Teleostomi;Euteleostomi;Sarcopterygii;Tetrapoda;Amniota;Mammalia;Theria;Eutheria;Euarchontoglires;Primates;Haplorrhini;Simiiformes;Catarrhini;Hominoidea;Hominidae;Homininae;Homo;Homo sapiens	49	5e-18	2	cellular organisms;Bacteria	51	3e-19	ERR006345.sra.5838129	ERR006345	ERX001127	SRS000639	SRP000547	ERA000138	1000 Genomes CEPH (Utah residents with ancestry from Northern and Western Europe) population sequencing	NA12830	NA12830.22	1000G-mpimg-090515-1	CEU	2009-10-06	20819118	408218	WGS	low coverage	no	ILLUMINA	data/NA12830/sequence_read/ERR006345.filt.fastq.gz	MPIMG	PAIRED	Solexa 1G Genome Analyzer	GENOMIC	184
cellular organisms;Eukaryota;Opisthokonta;Metazoa;Eumetazoa;Bilateria;Coelomata;Deuterostomia;Chordata;Craniata;Vertebrata;Gnathostomata;Teleostomi;Euteleostomi;Sarcopterygii;Tetrapoda;Amniota;Mammalia;Theria;Eutheria;Euarchontoglires;Primates;Haplorrhini;Simiiformes;Catarrhini;Hominoidea;Hominidae;Homininae;Homo;Homo sapiens	51	3e-19	1	cellular organisms;Bacteria;Proteobacteria;Gammaproteobacteria;Xanthomonadales;Xanthomonadaceae;Stenotrophomonas;Stenotrophomonas maltophilia group;Stenotrophomonas maltophilia;Stenotrophomonas maltophilia R551-3	48	5e-15	ERR006347.sra.10773370	ERR006347	ERX001127	SRS000639	SRP000547	ERA000138	1000 Genomes CEPH (Utah residents with ancestry from Northern and Western Europe) population sequencing	NA12830	NA12830.22	1000G-mpimg-090515-4	CEU	2009-10-06	5770701	113151	WGS	low coverage	no	ILLUMINA	data/NA12830/sequence_read/ERR006347.filt.fastq.gz	MPIMG	PAIRED	Solexa 1G Genome Analyzer	GENOMIC	184
cellular organisms;Eukaryota;Opisthokonta;Metazoa;Eumetazoa;Bilateria;Coelomata;Deuterostomia;Chordata;Craniata;Vertebrata;Gnathostomata;Teleostomi;Euteleostomi;Sarcopterygii;Tetrapoda;Amniota;Mammalia;Theria;Eutheria;Euarchontoglires;Primates;Haplorrhini;Simiiformes;Catarrhini;Hominoidea;Hominidae;Homininae;Homo;Homo sapiens	51	3e-19	1	cellular organisms;Bacteria;Proteobacteria;Gammaproteobacteria;Xanthomonadales;Xanthomonadaceae;Stenotrophomonas;Stenotrophomonas maltophilia group;Stenotrophomonas maltophilia;Stenotrophomonas maltophilia R551-3	50	1e-18	ERR006356.sra.1435476	ERR006356	ERX001132	SRS000639	SRP000547	ERA000139	1000 Genomes CEPH (Utah residents with ancestry from Northern and Western Europe) population sequencing	NA12830	NA12830.22	1000G-mpimg-090522-5	CEU	2009-10-15	32761380	642380	WGS	low coverage	no	ILLUMINA	data/NA12830/sequence_read/ERR006356.filt.fastq.gz	MPIMG	PAIRED	Solexa 1G Genome Analyzer	GENOMIC	164
cellular organisms;Eukaryota;Opisthokonta;Metazoa;Eumetazoa;Bilateria;Coelomata;Deuterostomia;Chordata;Craniata;Vertebrata;Gnathostomata;Teleostomi;Euteleostomi;Sarcopterygii;Tetrapoda;Amniota;Mammalia;Theria;Eutheria;Euarchontoglires;Primates;Haplorrhini;Simiiformes;Catarrhini;Hominoidea	51	8e-17	1	cellular organisms;Bacteria;Actinobacteria;Actinobacteria;Actinobacteridae;Actinomycetales;Propionibacterineae;Propionibacteriaceae;Propionibacterium;Propionibacterium acnes	51	3e-19	ERR006345.sra.1447114	ERR006345	ERX001127	SRS000639	SRP000547	ERA000138	1000 Genomes CEPH (Utah residents with ancestry from Northern and Western Europe) population sequencing	NA12830	NA12830.22	1000G-mpimg-090515-1	CEU	2009-10-06	20819118	408218	WGS	low coverage	no	ILLUMINA	data/NA12830/sequence_read/ERR006345.filt.fastq.gz	MPIMG	PAIRED	Solexa 1G Genome Analyzer	GENOMIC	184
cellular organisms;Eukaryota;Opisthokonta;Metazoa;Eumetazoa;Bilateria;Coelomata;Deuterostomia;Chordata;Craniata;Vertebrata;Gnathostomata;Teleostomi;Euteleostomi;Sarcopterygii;Tetrapoda;Amniota;Mammalia;Theria;Eutheria;Euarchontoglires;Primates;Haplorrhini;Simiiformes;Catarrhini;Hominoidea;Hominidae;Homininae;Homo;Homo sapiens	51	3e-19	1	cellular organisms;Bacteria;Proteobacteria;Gammaproteobacteria;Xanthomonadales;Xanthomonadaceae;Stenotrophomonas;Stenotrophomonas maltophilia group;Stenotrophomonas maltophilia;Stenotrophomonas maltophilia R551-3	51	3e-19	ERR006347.sra.830616	ERR006347	ERX001127	SRS000639	SRP000547	ERA000138	1000 Genomes CEPH (Utah residents with ancestry from Northern and Western Europe) population sequencing	NA12830	NA12830.22	1000G-mpimg-090515-4	CEU	2009-10-06	5770701	113151	WGS	low coverage	no	ILLUMINA	data/NA12830/sequence_read/ERR006347.filt.fastq.gz	MPIMG	PAIRED	Solexa 1G Genome Analyzer	GENOMIC	184
cellular organisms;Eukaryota;Opisthokonta;Metazoa;Eumetazoa;Bilateria;Coelomata;Deuterostomia;Chordata;Craniata;Vertebrata;Gnathostomata;Teleostomi;Euteleostomi;Sarcopterygii;Tetrapoda;Amniota;Mammalia;Theria;Eutheria;Euarchontoglires;Primates;Haplorrhini;Simiiformes;Catarrhini;Hominoidea;Hominidae;Homininae;Homo;Homo sapiens	51	3e-19	1	cellular organisms;Bacteria;Proteobacteria	51	3e-19	ERR006347.sra.5129449	ERR006347	ERX001127	SRS000639	SRP000547	ERA000138	1000 Genomes CEPH (Utah residents with ancestry from Northern and Western Europe) population sequencing	NA12830	NA12830.22	1000G-mpimg-090515-4	CEU	2009-10-06	5770701	113151	WGS	low coverage	no	ILLUMINA	data/NA12830/sequence_read/ERR006347.filt.fastq.gz	MPIMG	PAIRED	Solexa 1G Genome Analyzer	GENOMIC	184
cellular organisms;Eukaryota;Opisthokonta;Metazoa;Eumetazoa;Bilateria;Coelomata;Deuterostomia;Chordata;Craniata;Vertebrata;Gnathostomata;Teleostomi;Euteleostomi;Sarcopterygii;Tetrapoda;Amniota;Mammalia;Theria;Eutheria;Euarchontoglires;Primates;Haplorrhini;Simiiformes;Catarrhini;Hominoidea;Hominidae;Homininae;Homo;Homo sapiens	51	3e-19	2	cellular organisms;Bacteria;Proteobacteria;Gammaproteobacteria;Enterobacteriales;Enterobacteriaceae;Pantoea;Pantoea vagans;Pantoea vagans C9-1	50	1e-18	ERR006347.sra.863117	ERR006347	ERX001127	SRS000639	SRP000547	ERA000138	1000 Genomes CEPH (Utah residents with ancestry from Northern and Western Europe) population sequencing	NA12830	NA12830.22	1000G-mpimg-090515-4	CEU	2009-10-06	5770701	113151	WGS	low coverage	no	ILLUMINA	data/NA12830/sequence_read/ERR006347.filt.fastq.gz	MPIMG	PAIRED	Solexa 1G Genome Analyzer	GENOMIC	184
cellular organisms;Eukaryota;Opisthokonta;Metazoa;Eumetazoa;Bilateria;Coelomata;Deuterostomia;Chordata;Craniata;Vertebrata;Gnathostomata;Teleostomi;Euteleostomi;Sarcopterygii;Tetrapoda;Amniota;Mammalia;Theria;Eutheria;Euarchontoglires;Primates;Haplorrhini;Simiiformes;Catarrhini;Hominoidea;Hominidae;Homininae;Homo;Homo sapiens	51	3e-19	2	cellular organisms;Bacteria;Proteobacteria;Gammaproteobacteria;Enterobacteriales;Enterobacteriaceae;Serratia	51	8e-17	ERR006347.sra.4440156	ERR006347	ERX001127	SRS000639	SRP000547	ERA000138	1000 Genomes CEPH (Utah residents with ancestry from Northern and Western Europe) population sequencing	NA12830	NA12830.22	1000G-mpimg-090515-4	CEU	2009-10-06	5770701	113151	WGS	low coverage	no	ILLUMINA	data/NA12830/sequence_read/ERR006347.filt.fastq.gz	MPIMG	PAIRED	Solexa 1G Genome Analyzer	GENOMIC	184
cellular organisms;Eukaryota;Opisthokonta;Metazoa;Eumetazoa;Bilateria;Coelomata;Deuterostomia;Chordata;Craniata;Vertebrata;Gnathostomata;Teleostomi;Euteleostomi;Sarcopterygii;Tetrapoda;Amniota;Mammalia;Theria;Eutheria;Euarchontoglires;Primates;Haplorrhini;Simiiformes;Catarrhini;Hominoidea;Hominidae;Homininae;Homo;Homo sapiens	51	3e-19	1	cellular organisms;Bacteria;Proteobacteria;Gammaproteobacteria;Xanthomonadales;Xanthomonadaceae;Stenotrophomonas;Stenotrophomonas maltophilia group;Stenotrophomonas maltophilia;Stenotrophomonas maltophilia JV3	51	8e-17	ERR006347.sra.5101682	ERR006347	ERX001127	SRS000639	SRP000547	ERA000138	1000 Genomes CEPH (Utah residents with ancestry from Northern and Western Europe) population sequencing	NA12830	NA12830.22	1000G-mpimg-090515-4	CEU	2009-10-06	5770701	113151	WGS	low coverage	no	ILLUMINA	data/NA12830/sequence_read/ERR006347.filt.fastq.gz	MPIMG	PAIRED	Solexa 1G Genome Analyzer	GENOMIC	184
cellular organisms;Eukaryota;Opisthokonta;Metazoa;Eumetazoa;Bilateria;Coelomata;Deuterostomia;Chordata;Craniata;Vertebrata;Gnathostomata;Teleostomi;Euteleostomi;Sarcopterygii;Tetrapoda;Amniota;Mammalia;Theria;Eutheria;Euarchontoglires;Primates;Haplorrhini;Simiiformes;Catarrhini;Hominoidea;Hominidae;Homininae;Homo;Homo sapiens	46	3e-16	1	cellular organisms;Bacteria;Proteobacteria;Gammaproteobacteria;Enterobacteriales;Enterobacteriaceae;Serratia	51	3e-19	ERR006366.sra.2153024	ERR006366	ERX001138	SRS000639	SRP000547	ERA000141	1000 Genomes CEPH (Utah residents with ancestry from Northern and Western Europe) population sequencing	NA12830	NA12830.22	1000G-mpimg-090608-1	CEU	2009-10-06	58676877	1150527	WGS	low coverage	no	ILLUMINA	data/NA12830/sequence_read/ERR006366.filt.fastq.gz	MPIMG	PAIRED	Solexa 1G Genome Analyzer	GENOMIC	145
cellular organisms;Eukaryota;Opisthokonta;Metazoa;Eumetazoa;Bilateria;Coelomata;Deuterostomia;Chordata;Craniata;Vertebrata;Gnathostomata;Teleostomi;Euteleostomi;Sarcopterygii;Tetrapoda;Amniota;Mammalia;Theria;Eutheria;Euarchontoglires;Primates;Haplorrhini;Simiiformes;Catarrhini;Hominoidea;Hominidae;Homininae;Homo;Homo sapiens	37	4e-11	1	cellular organisms;Bacteria;Actinobacteria;Actinobacteria;Actinobacteridae;Actinomycetales;Propionibacterineae;Propionibacteriaceae;Propionibacterium;Propionibacterium acnes	37	1e-08	ERR000830.sra.5680451	ERR000830	ERX000066	SRS000033	SRP000031	ERA000024	1000Genomes Project Pilot 1	NA07000	g1k-sc-NA07000-CEU-1	IL4_993_1	CEU	2008-08-12	2400930	64890	WGS	low coverage	no	ILLUMINA	data/NA07000/sequence_read/ERR000830.filt.fastq.gz	SC	PAIRED	Solexa 1G Genome Analyzer	GENOMIC	175
cellular organisms;Eukaryota;Opisthokonta;Metazoa;Eumetazoa;Bilateria;Coelomata;Deuterostomia;Chordata;Craniata;Vertebrata;Gnathostomata;Teleostomi;Euteleostomi;Sarcopterygii;Tetrapoda;Amniota;Mammalia;Theria;Eutheria;Euarchontoglires;Primates;Haplorrhini;Simiiformes;Catarrhini;Hominoidea;Hominidae;Homininae;Homo;Homo sapiens	50	1e-18	1	cellular organisms;Bacteria;Proteobacteria;Gammaproteobacteria;Xanthomonadales;Xanthomonadaceae;Stenotrophomonas;Stenotrophomonas maltophilia group;Stenotrophomonas maltophilia	44	5e-15	ERR006366.sra.2470351	ERR006366	ERX001138	SRS000639	SRP000547	ERA000141	1000 Genomes CEPH (Utah residents with ancestry from Northern and Western Europe) population sequencing	NA12830	NA12830.22	1000G-mpimg-090608-1	CEU	2009-10-06	58676877	1150527	WGS	low coverage	no	ILLUMINA	data/NA12830/sequence_read/ERR006366.filt.fastq.gz	MPIMG	PAIRED	Solexa 1G Genome Analyzer	GENOMIC	145
cellular organisms;Eukaryota;Opisthokonta;Metazoa;Eumetazoa;Bilateria;Coelomata;Deuterostomia;Chordata;Craniata;Vertebrata;Gnathostomata;Teleostomi;Euteleostomi;Sarcopterygii;Tetrapoda;Amniota;Mammalia;Theria;Eutheria;Euarchontoglires;Primates;Haplorrhini;Simiiformes;Catarrhini;Hominoidea;Hominidae;Homininae;Homo;Homo sapiens	51	3e-19	1	cellular organisms;Bacteria;Proteobacteria;Gammaproteobacteria;Enterobacteriales;Enterobacteriaceae;Serratia	50	1e-18	ERR006355.sra.7074962	ERR006355	ERX001132	SRS000639	SRP000547	ERA000139	1000 Genomes CEPH (Utah residents with ancestry from Northern and Western Europe) population sequencing	NA12830	NA12830.22	1000G-mpimg-090522-4	CEU	2009-10-15	66968202	1313102	WGS	low coverage	no	ILLUMINA	data/NA12830/sequence_read/ERR006355.filt.fastq.gz	MPIMG	PAIRED	Solexa 1G Genome Analyzer	GENOMIC	164
cellular organisms;Eukaryota;Opisthokonta;Metazoa;Eumetazoa;Bilateria;Coelomata;Deuterostomia;Chordata;Craniata;Vertebrata;Gnathostomata;Teleostomi;Euteleostomi;Sarcopterygii;Tetrapoda;Amniota;Mammalia;Theria;Eutheria;Euarchontoglires;Primates;Haplorrhini;Simiiformes;Catarrhini;Hominoidea;Hominidae;Homininae;Homo;Homo sapiens	51	3e-19	1	cellular organisms;Bacteria;Proteobacteria;Gammaproteobacteria;Enterobacteriales;Enterobacteriaceae;Serratia	51	2e-14	ERR006355.sra.13378009	ERR006355	ERX001132	SRS000639	SRP000547	ERA000139	1000 Genomes CEPH (Utah residents with ancestry from Northern and Western Europe) population sequencing	NA12830	NA12830.22	1000G-mpimg-090522-4	CEU	2009-10-15	66968202	1313102	WGS	low coverage	no	ILLUMINA	data/NA12830/sequence_read/ERR006355.filt.fastq.gz	MPIMG	PAIRED	Solexa 1G Genome Analyzer	GENOMIC	164
cellular organisms;Eukaryota;Opisthokonta;Metazoa;Eumetazoa;Bilateria;Coelomata;Deuterostomia;Chordata;Craniata;Vertebrata;Gnathostomata;Teleostomi;Euteleostomi;Sarcopterygii;Tetrapoda;Amniota;Mammalia;Theria;Eutheria;Euarchontoglires;Primates;Haplorrhini;Simiiformes;Catarrhini;Hominoidea;Hominidae;Homininae;Homo;Homo sapiens	51	8e-17	3	cellular organisms;Bacteria;Proteobacteria;Gammaproteobacteria;Xanthomonadales;Xanthomonadaceae;Stenotrophomonas;Stenotrophomonas maltophilia group;Stenotrophomonas maltophilia;Stenotrophomonas maltophilia K279a	48	2e-17	ERR006355.sra.2872475	ERR006355	ERX001132	SRS000639	SRP000547	ERA000139	1000 Genomes CEPH (Utah residents with ancestry from Northern and Western Europe) population sequencing	NA12830	NA12830.22	1000G-mpimg-090522-4	CEU	2009-10-15	66968202	1313102	WGS	low coverage	no	ILLUMINA	data/NA12830/sequence_read/ERR006355.filt.fastq.gz	MPIMG	PAIRED	Solexa 1G Genome Analyzer	GENOMIC	164
cellular organisms;Eukaryota;Opisthokonta;Metazoa;Eumetazoa;Bilateria;Coelomata;Deuterostomia;Chordata;Craniata;Vertebrata;Gnathostomata;Teleostomi;Euteleostomi;Sarcopterygii;Tetrapoda;Amniota;Mammalia;Theria;Eutheria;Euarchontoglires;Primates;Haplorrhini;Simiiformes;Catarrhini;Hominoidea;Hominidae;Homininae;Homo;Homo sapiens	51	3e-19	1	cellular organisms;Bacteria;Proteobacteria;Gammaproteobacteria;Enterobacteriales;Enterobacteriaceae	51	2e-14	ERR006347.sra.9751920	ERR006347	ERX001127	SRS000639	SRP000547	ERA000138	1000 Genomes CEPH (Utah residents with ancestry from Northern and Western Europe) population sequencing	NA12830	NA12830.22	1000G-mpimg-090515-4	CEU	2009-10-06	5770701	113151	WGS	low coverage	no	ILLUMINA	data/NA12830/sequence_read/ERR006347.filt.fastq.gz	MPIMG	PAIRED	Solexa 1G Genome Analyzer	GENOMIC	184
cellular organisms;Eukaryota;Opisthokonta;Metazoa;Eumetazoa;Bilateria;Coelomata;Deuterostomia;Chordata;Craniata;Vertebrata;Gnathostomata;Teleostomi;Euteleostomi;Sarcopterygii;Tetrapoda;Amniota;Mammalia;Theria;Eutheria;Euarchontoglires;Primates;Haplorrhini;Simiiformes;Catarrhini;Hominoidea;Hominidae;Homininae;Homo;Homo sapiens	50	8e-14	1	cellular organisms;Bacteria;Proteobacteria;Gammaproteobacteria;Enterobacteriales;Enterobacteriaceae;Serratia	48	2e-17	ERR006347.sra.9371785	ERR006347	ERX001127	SRS000639	SRP000547	ERA000138	1000 Genomes CEPH (Utah residents with ancestry from Northern and Western Europe) population sequencing	NA12830	NA12830.22	1000G-mpimg-090515-4	CEU	2009-10-06	5770701	113151	WGS	low coverage	no	ILLUMINA	data/NA12830/sequence_read/ERR006347.filt.fastq.gz	MPIMG	PAIRED	Solexa 1G Genome Analyzer	GENOMIC	184
cellular organisms;Eukaryota;Opisthokonta;Metazoa;Eumetazoa;Bilateria;Coelomata;Deuterostomia;Chordata;Craniata;Vertebrata;Gnathostomata;Teleostomi;Euteleostomi;Sarcopterygii;Tetrapoda;Amniota;Mammalia;Theria;Eutheria;Euarchontoglires;Primates;Haplorrhini;Simiiformes;Catarrhini;Hominoidea;Hominidae;Homininae;Homo;Homo sapiens	51	3e-19	1	cellular organisms;Bacteria;Actinobacteria;Actinobacteria;Actinobacteridae;Actinomycetales;Propionibacterineae;Propionibacteriaceae;Propionibacterium;Propionibacterium acnes	47	8e-17	ERR006345.sra.9182385	ERR006345	ERX001127	SRS000639	SRP000547	ERA000138	1000 Genomes CEPH (Utah residents with ancestry from Northern and Western Europe) population sequencing	NA12830	NA12830.22	1000G-mpimg-090515-1	CEU	2009-10-06	20819118	408218	WGS	low coverage	no	ILLUMINA	data/NA12830/sequence_read/ERR006345.filt.fastq.gz	MPIMG	PAIRED	Solexa 1G Genome Analyzer	GENOMIC	184
cellular organisms;Eukaryota;Opisthokonta;Metazoa;Eumetazoa;Bilateria;Coelomata;Deuterostomia;Chordata;Craniata;Vertebrata;Gnathostomata;Teleostomi;Euteleostomi;Sarcopterygii;Tetrapoda;Amniota;Mammalia;Theria;Eutheria;Euarchontoglires;Primates;Haplorrhini;Simiiformes;Catarrhini;Hominoidea;Hominidae;Homininae;Homo;Homo sapiens	44	5e-15	2	cellular organisms;Bacteria;Proteobacteria	51	8e-17	ERR006346.sra.1324550	ERR006346	ERX001127	SRS000639	SRP000547	ERA000138	1000 Genomes CEPH (Utah residents with ancestry from Northern and Western Europe) population sequencing	NA12830	NA12830.22	1000G-mpimg-090515-2	CEU	2009-10-06	10555929	206979	WGS	low coverage	no	ILLUMINA	data/NA12830/sequence_read/ERR006346.filt.fastq.gz	MPIMG	PAIRED	Solexa 1G Genome Analyzer	GENOMIC	184
cellular organisms;Eukaryota;Opisthokonta;Metazoa;Eumetazoa;Bilateria;Coelomata;Deuterostomia;Chordata;Craniata;Vertebrata;Gnathostomata;Teleostomi;Euteleostomi;Sarcopterygii;Tetrapoda;Amniota;Mammalia;Theria;Eutheria;Euarchontoglires;Primates;Haplorrhini;Simiiformes;Catarrhini;Hominoidea;Hominidae;Homininae;Homo;Homo sapiens	51	3e-19	1	cellular organisms;Bacteria;Proteobacteria;Gammaproteobacteria;Xanthomonadales;Xanthomonadaceae;Stenotrophomonas;Stenotrophomonas maltophilia group;Stenotrophomonas maltophilia	51	3e-19	ERR006347.sra.9752736	ERR006347	ERX001127	SRS000639	SRP000547	ERA000138	1000 Genomes CEPH (Utah residents with ancestry from Northern and Western Europe) population sequencing	NA12830	NA12830.22	1000G-mpimg-090515-4	CEU	2009-10-06	5770701	113151	WGS	low coverage	no	ILLUMINA	data/NA12830/sequence_read/ERR006347.filt.fastq.gz	MPIMG	PAIRED	Solexa 1G Genome Analyzer	GENOMIC	184
cellular organisms;Eukaryota;Opisthokonta;Metazoa;Eumetazoa;Bilateria;Coelomata;Deuterostomia;Chordata;Craniata;Vertebrata;Gnathostomata;Teleostomi;Euteleostomi;Sarcopterygii;Tetrapoda;Amniota;Mammalia;Theria;Eutheria;Euarchontoglires;Primates;Haplorrhini;Simiiformes;Catarrhini;Hominoidea;Hominidae;Homininae;Homo;Homo sapiens	51	3e-19	1	cellular organisms;Bacteria;Proteobacteria;Gammaproteobacteria;Enterobacteriales;Enterobacteriaceae;Serratia	47	8e-17	ERR006366.sra.8818219	ERR006366	ERX001138	SRS000639	SRP000547	ERA000141	1000 Genomes CEPH (Utah residents with ancestry from Northern and Western Europe) population sequencing	NA12830	NA12830.22	1000G-mpimg-090608-1	CEU	2009-10-06	58676877	1150527	WGS	low coverage	no	ILLUMINA	data/NA12830/sequence_read/ERR006366.filt.fastq.gz	MPIMG	PAIRED	Solexa 1G Genome Analyzer	GENOMIC	145
cellular organisms;Eukaryota;Opisthokonta;Metazoa;Eumetazoa;Bilateria;Coelomata;Deuterostomia;Chordata;Craniata;Vertebrata;Gnathostomata;Teleostomi;Euteleostomi;Sarcopterygii;Tetrapoda;Amniota;Mammalia;Theria;Eutheria;Euarchontoglires;Primates;Haplorrhini;Simiiformes;Catarrhini;Hominoidea;Hominidae;Homininae;Homo;Homo sapiens	36	2e-10	1	cellular organisms;Bacteria;Proteobacteria;Betaproteobacteria;Burkholderiales;Burkholderiaceae;Burkholderia;Burkholderia cepacia complex	36	4e-08	ERR001713.sra.4325227	ERR001713	ERX000170	SRS000090	SRP000032	ERA000068	1000Genomes Project Pilot 2	NA12878	g1k-sc-NA12878-CEU-1	IL22_348_2	CEU	2008-12-15	113326920	3147970	WGS	high coverage	no	ILLUMINA	data/NA12878/sequence_read/ERR001713.filt.fastq.gz	SC	PAIRED	Solexa 1G Genome Analyzer	GENOMIC	175
cellular organisms;Eukaryota;Opisthokonta;Metazoa;Eumetazoa;Bilateria;Coelomata;Deuterostomia;Chordata;Craniata;Vertebrata;Gnathostomata;Teleostomi;Euteleostomi;Sarcopterygii;Tetrapoda;Amniota;Mammalia;Theria;Eutheria;Euarchontoglires;Primates;Haplorrhini;Simiiformes;Catarrhini;Hominoidea;Hominidae;Homininae;Homo;Homo sapiens	51	3e-19	1	cellular organisms;Bacteria;Actinobacteria;Actinobacteria;Actinobacteridae;Actinomycetales;Propionibacterineae;Propionibacteriaceae;Propionibacterium;Propionibacterium acnes;Propionibacterium acnes ATCC 11828	51	3e-19	ERR006347.sra.2170116	ERR006347	ERX001127	SRS000639	SRP000547	ERA000138	1000 Genomes CEPH (Utah residents with ancestry from Northern and Western Europe) population sequencing	NA12830	NA12830.22	1000G-mpimg-090515-4	CEU	2009-10-06	5770701	113151	WGS	low coverage	no	ILLUMINA	data/NA12830/sequence_read/ERR006347.filt.fastq.gz	MPIMG	PAIRED	Solexa 1G Genome Analyzer	GENOMIC	184
cellular organisms;Eukaryota;Opisthokonta;Metazoa;Eumetazoa;Bilateria;Coelomata;Deuterostomia;Chordata;Craniata;Vertebrata;Gnathostomata;Teleostomi;Euteleostomi;Sarcopterygii;Tetrapoda;Amniota;Mammalia;Theria;Eutheria;Euarchontoglires;Primates;Haplorrhini;Simiiformes;Catarrhini;Hominoidea;Hominidae;Homininae;Homo;Homo sapiens	51	3e-19	1	cellular organisms;Bacteria;Actinobacteria;Actinobacteria;Actinobacteridae;Actinomycetales;Propionibacterineae;Propionibacteriaceae;Propionibacterium;Propionibacterium acnes;Propionibacterium acnes ATCC 11828	51	3e-19	ERR006345.sra.7561535	ERR006345	ERX001127	SRS000639	SRP000547	ERA000138	1000 Genomes CEPH (Utah residents with ancestry from Northern and Western Europe) population sequencing	NA12830	NA12830.22	1000G-mpimg-090515-1	CEU	2009-10-06	20819118	408218	WGS	low coverage	no	ILLUMINA	data/NA12830/sequence_read/ERR006345.filt.fastq.gz	MPIMG	PAIRED	Solexa 1G Genome Analyzer	GENOMIC	184
cellular organisms;Eukaryota;Opisthokonta;Metazoa;Eumetazoa;Bilateria;Coelomata;Deuterostomia;Chordata;Craniata;Vertebrata;Gnathostomata;Teleostomi;Euteleostomi;Sarcopterygii;Tetrapoda;Amniota;Mammalia;Theria;Eutheria;Euarchontoglires;Primates;Haplorrhini;Simiiformes;Catarrhini;Hominoidea;Hominidae;Homininae;Homo;Homo sapiens	36	2e-10	1	cellular organisms;Bacteria;Proteobacteria;Betaproteobacteria;Burkholderiales;Burkholderiaceae;Polynucleobacter;Polynucleobacter necessarius;Polynucleobacter necessarius subsp. asymbioticus;Polynucleobacter necessarius subsp. asymbioticus QLW-P1DMWA-1	36	4e-08	ERR001848.sra.6203883	ERR001848	ERX000174	SRS000092	SRP000032	ERA000070	1000Genomes Project Pilot 2	NA12892	g1k-sc-NA12892-CEU-1	IL12_283_1	CEU	2008-12-15	4633884	128719	WGS	high coverage	no	ILLUMINA	data/NA12892/sequence_read/ERR001848.filt.fastq.gz	SC	PAIRED	Solexa 1G Genome Analyzer	GENOMIC	175
cellular organisms;Eukaryota;Opisthokonta;Metazoa;Eumetazoa;Bilateria;Coelomata;Deuterostomia;Chordata;Craniata;Vertebrata;Gnathostomata;Teleostomi;Euteleostomi;Sarcopterygii;Tetrapoda;Amniota;Mammalia;Theria;Eutheria;Euarchontoglires;Primates;Haplorrhini;Simiiformes;Catarrhini;Hominoidea;Hominidae;Homininae;Homo;Homo sapiens	51	3e-19	1	cellular organisms;Bacteria;Proteobacteria;Gammaproteobacteria;Xanthomonadales;Xanthomonadaceae;Stenotrophomonas;Stenotrophomonas maltophilia group;Stenotrophomonas maltophilia;Stenotrophomonas maltophilia JV3	51	3e-19	ERR006356.sra.2873436	ERR006356	ERX001132	SRS000639	SRP000547	ERA000139	1000 Genomes CEPH (Utah residents with ancestry from Northern and Western Europe) population sequencing	NA12830	NA12830.22	1000G-mpimg-090522-5	CEU	2009-10-15	32761380	642380	WGS	low coverage	no	ILLUMINA	data/NA12830/sequence_read/ERR006356.filt.fastq.gz	MPIMG	PAIRED	Solexa 1G Genome Analyzer	GENOMIC	164
cellular organisms;Eukaryota;Opisthokonta;Metazoa;Eumetazoa;Bilateria;Coelomata;Deuterostomia;Chordata;Craniata;Vertebrata;Gnathostomata;Teleostomi;Euteleostomi;Sarcopterygii;Tetrapoda;Amniota;Mammalia;Theria;Eutheria;Euarchontoglires;Primates;Haplorrhini;Simiiformes;Catarrhini;Hominoidea;Hominidae;Homininae;Homo;Homo sapiens	51	3e-19	1	cellular organisms;Bacteria;Proteobacteria;Gammaproteobacteria;Enterobacteriales;Enterobacteriaceae;Dickeya;Dickeya dadantii;Dickeya dadantii Ech586	51	5e-12	ERR006347.sra.11659795	ERR006347	ERX001127	SRS000639	SRP000547	ERA000138	1000 Genomes CEPH (Utah residents with ancestry from Northern and Western Europe) population sequencing	NA12830	NA12830.22	1000G-mpimg-090515-4	CEU	2009-10-06	5770701	113151	WGS	low coverage	no	ILLUMINA	data/NA12830/sequence_read/ERR006347.filt.fastq.gz	MPIMG	PAIRED	Solexa 1G Genome Analyzer	GENOMIC	184
cellular organisms;Eukaryota;Opisthokonta;Metazoa;Eumetazoa;Bilateria;Coelomata;Deuterostomia;Chordata;Craniata;Vertebrata;Gnathostomata;Teleostomi;Euteleostomi;Sarcopterygii;Tetrapoda;Amniota;Mammalia;Theria;Eutheria;Euarchontoglires;Primates;Haplorrhini;Simiiformes;Catarrhini;Hominoidea;Hominidae;Homininae;Homo;Homo sapiens	51	3e-19	1	cellular organisms;Bacteria;Proteobacteria;Gammaproteobacteria;Enterobacteriales;Enterobacteriaceae	47	2e-14	ERR006354.sra.9618037	ERR006354	ERX001132	SRS000639	SRP000547	ERA000139	1000 Genomes CEPH (Utah residents with ancestry from Northern and Western Europe) population sequencing	NA12830	NA12830.22	1000G-mpimg-090522-3	CEU	2009-10-15	41581728	815328	WGS	low coverage	no	ILLUMINA	data/NA12830/sequence_read/ERR006354.filt.fastq.gz	MPIMG	PAIRED	Solexa 1G Genome Analyzer	GENOMIC	164
cellular organisms;Eukaryota;Opisthokonta;Metazoa;Eumetazoa;Bilateria;Coelomata;Deuterostomia;Chordata;Craniata;Vertebrata;Gnathostomata;Teleostomi;Euteleostomi;Sarcopterygii;Tetrapoda;Amniota;Mammalia;Theria;Eutheria;Euarchontoglires;Primates;Haplorrhini;Simiiformes;Catarrhini;Hominoidea;Hominidae;Homininae;Homo;Homo sapiens	51	3e-19	1	cellular organisms;Bacteria;Proteobacteria;Gammaproteobacteria;Enterobacteriales;Enterobacteriaceae;Serratia;Serratia proteamaculans;Serratia proteamaculans 568	51	2e-14	ERR006355.sra.2077931	ERR006355	ERX001132	SRS000639	SRP000547	ERA000139	1000 Genomes CEPH (Utah residents with ancestry from Northern and Western Europe) population sequencing	NA12830	NA12830.22	1000G-mpimg-090522-4	CEU	2009-10-15	66968202	1313102	WGS	low coverage	no	ILLUMINA	data/NA12830/sequence_read/ERR006355.filt.fastq.gz	MPIMG	PAIRED	Solexa 1G Genome Analyzer	GENOMIC	164
cellular organisms;Eukaryota;Opisthokonta;Metazoa;Eumetazoa;Bilateria;Coelomata;Deuterostomia;Chordata;Craniata;Vertebrata;Gnathostomata;Teleostomi;Euteleostomi;Sarcopterygii;Tetrapoda;Amniota;Mammalia;Theria;Eutheria;Euarchontoglires;Primates;Haplorrhini;Simiiformes;Catarrhini;Hominoidea;Hominidae;Homininae;Homo;Homo sapiens	50	1e-18	1	cellular organisms;Bacteria;Proteobacteria;Gammaproteobacteria;Xanthomonadales;Xanthomonadaceae;Stenotrophomonas;Stenotrophomonas maltophilia group;Stenotrophomonas maltophilia;Stenotrophomonas maltophilia R551-3	51	8e-17	ERR006419.sra.8463735	ERR006419	ERX001155	SRS000637	SRP000547	ERA000149	1000 Genomes CEPH (Utah residents with ancestry from Northern and Western Europe) population sequencing	NA12827	NA12827.20	1000G-mpimg-090730-7	CEU	2009-10-07	178983531	3509481	WGS	low coverage	no	ILLUMINA	data/NA12827/sequence_read/ERR006419.filt.fastq.gz	MPIMG	PAIRED	Solexa 1G Genome Analyzer	GENOMIC	170
cellular organisms;Eukaryota;Opisthokonta;Metazoa;Eumetazoa;Bilateria;Coelomata;Deuterostomia;Chordata;Craniata;Vertebrata;Gnathostomata;Teleostomi;Euteleostomi;Sarcopterygii;Tetrapoda;Amniota;Mammalia;Theria;Eutheria;Euarchontoglires;Primates;Haplorrhini;Simiiformes;Catarrhini;Hominoidea;Hominidae;Homininae;Homo;Homo sapiens	51	3e-19	1	cellular organisms;Bacteria;Proteobacteria;Gammaproteobacteria;Xanthomonadales;Xanthomonadaceae;Stenotrophomonas;Stenotrophomonas maltophilia group;Stenotrophomonas maltophilia;Stenotrophomonas maltophilia R551-3	48	1e-12	ERR006355.sra.6948766	ERR006355	ERX001132	SRS000639	SRP000547	ERA000139	1000 Genomes CEPH (Utah residents with ancestry from Northern and Western Europe) population sequencing	NA12830	NA12830.22	1000G-mpimg-090522-4	CEU	2009-10-15	66968202	1313102	WGS	low coverage	no	ILLUMINA	data/NA12830/sequence_read/ERR006355.filt.fastq.gz	MPIMG	PAIRED	Solexa 1G Genome Analyzer	GENOMIC	164
cellular organisms;Eukaryota;Opisthokonta;Metazoa;Eumetazoa;Bilateria;Coelomata;Deuterostomia;Chordata;Craniata;Vertebrata;Gnathostomata;Teleostomi;Euteleostomi;Sarcopterygii;Tetrapoda;Amniota;Mammalia;Theria;Eutheria;Euarchontoglires;Primates;Haplorrhini;Simiiformes;Catarrhini	36	2e-10	1	cellular organisms;Bacteria;Actinobacteria;Actinobacteria;Actinobacteridae;Actinomycetales;Propionibacterineae;Propionibacteriaceae;Propionibacterium;Propionibacterium acnes	36	2e-10	ERR005841.sra.9573492	ERR005841	ERX000722	SRS000619	SRP000547	ERA000109	1000 Genomes CEPH (Utah residents with ancestry from Northern and Western Europe) population sequencing	NA12282	NA12282.16	1000G-mpimg-090115-1	CEU	2009-09-04	19678824	546634	WGS	low coverage	no	ILLUMINA	data/NA12282/sequence_read/ERR005841.filt.fastq.gz	MPIMG	PAIRED	Solexa 1G Genome Analyzer	GENOMIC	172
cellular organisms;Eukaryota;Opisthokonta;Metazoa;Eumetazoa;Bilateria;Coelomata;Deuterostomia;Chordata;Craniata;Vertebrata;Gnathostomata;Teleostomi;Euteleostomi;Sarcopterygii;Tetrapoda;Amniota;Mammalia;Theria;Eutheria;Euarchontoglires;Primates;Haplorrhini;Simiiformes;Catarrhini;Hominoidea;Hominidae;Homininae;Homo;Homo sapiens	51	3e-19	1	cellular organisms;Bacteria;Proteobacteria;Gammaproteobacteria;Xanthomonadales;Xanthomonadaceae	51	2e-14	ERR006347.sra.6192046	ERR006347	ERX001127	SRS000639	SRP000547	ERA000138	1000 Genomes CEPH (Utah residents with ancestry from Northern and Western Europe) population sequencing	NA12830	NA12830.22	1000G-mpimg-090515-4	CEU	2009-10-06	5770701	113151	WGS	low coverage	no	ILLUMINA	data/NA12830/sequence_read/ERR006347.filt.fastq.gz	MPIMG	PAIRED	Solexa 1G Genome Analyzer	GENOMIC	184
cellular organisms;Eukaryota;Opisthokonta;Metazoa;Eumetazoa;Bilateria;Coelomata;Deuterostomia;Chordata;Craniata;Vertebrata;Gnathostomata;Teleostomi;Euteleostomi;Sarcopterygii;Tetrapoda;Amniota;Mammalia;Theria;Eutheria;Euarchontoglires;Primates;Haplorrhini;Simiiformes;Catarrhini;Hominoidea;Hominidae;Homininae;Homo;Homo sapiens	51	3e-19	2	cellular organisms;Bacteria;Proteobacteria;Gammaproteobacteria;Xanthomonadales;Xanthomonadaceae;Stenotrophomonas;Stenotrophomonas maltophilia group;Stenotrophomonas maltophilia	51	2e-14	ERR006347.sra.3191258	ERR006347	ERX001127	SRS000639	SRP000547	ERA000138	1000 Genomes CEPH (Utah residents with ancestry from Northern and Western Europe) population sequencing	NA12830	NA12830.22	1000G-mpimg-090515-4	CEU	2009-10-06	5770701	113151	WGS	low coverage	no	ILLUMINA	data/NA12830/sequence_read/ERR006347.filt.fastq.gz	MPIMG	PAIRED	Solexa 1G Genome Analyzer	GENOMIC	184
cellular organisms;Eukaryota;Opisthokonta;Metazoa;Eumetazoa;Bilateria;Coelomata;Deuterostomia;Chordata;Craniata;Vertebrata;Gnathostomata;Teleostomi;Euteleostomi;Sarcopterygii;Tetrapoda;Amniota;Mammalia;Theria;Eutheria;Euarchontoglires;Primates;Haplorrhini;Simiiformes;Catarrhini;Hominoidea;Hominidae;Homininae;Homo;Homo sapiens	51	3e-19	1	cellular organisms;Bacteria;Proteobacteria;Gammaproteobacteria;Enterobacteriales;Enterobacteriaceae	47	8e-17	ERR007533.sra.5475551	ERR007533	ERX002179	SRS000614	SRP000547	ERA000169	1000 Genomes CEPH (Utah residents with ancestry from Northern and Western Europe) population sequencing	NA11930	NA11930.12	1000G-mpimg-091106-2	CEU	2009-11-23	137937303	2704653	WGS	low coverage	no	ILLUMINA	data/NA11930/sequence_read/ERR007533.filt.fastq.gz	MPIMG	PAIRED	Solexa 1G Genome Analyzer	GENOMIC	171
cellular organisms;Eukaryota;Opisthokonta;Metazoa;Eumetazoa;Bilateria;Coelomata;Deuterostomia;Chordata;Craniata;Vertebrata;Gnathostomata;Teleostomi;Euteleostomi;Sarcopterygii;Tetrapoda;Amniota;Mammalia;Theria;Eutheria;Euarchontoglires;Primates;Haplorrhini;Simiiformes;Catarrhini;Hominoidea;Hominidae;Homininae;Homo;Homo sapiens	51	3e-19	1	cellular organisms;Bacteria;Proteobacteria;Gammaproteobacteria;Enterobacteriales;Enterobacteriaceae;Klebsiella	51	8e-17	ERR006347.sra.10565727	ERR006347	ERX001127	SRS000639	SRP000547	ERA000138	1000 Genomes CEPH (Utah residents with ancestry from Northern and Western Europe) population sequencing	NA12830	NA12830.22	1000G-mpimg-090515-4	CEU	2009-10-06	5770701	113151	WGS	low coverage	no	ILLUMINA	data/NA12830/sequence_read/ERR006347.filt.fastq.gz	MPIMG	PAIRED	Solexa 1G Genome Analyzer	GENOMIC	184
cellular organisms;Eukaryota;Opisthokonta;Metazoa;Eumetazoa;Bilateria;Coelomata;Deuterostomia;Chordata;Craniata;Vertebrata;Gnathostomata;Teleostomi;Euteleostomi;Sarcopterygii;Tetrapoda;Amniota;Mammalia;Theria;Eutheria	36	4e-08	1	cellular organisms;Bacteria;Actinobacteria;Actinobacteria;Actinobacteridae;Actinomycetales;Propionibacterineae;Propionibacteriaceae;Propionibacterium;Propionibacterium acnes	36	4e-08	ERR006322.sra.1601353	ERR006322	ERX001119	SRS000638	SRP000547	ERA000134	1000 Genomes CEPH (Utah residents with ancestry from Northern and Western Europe) population sequencing	NA12829	NA12829.21	1000G-mpimg-090413-2	CEU	2009-10-06	128975256	3582646	WGS	low coverage	no	ILLUMINA	data/NA12829/sequence_read/ERR006322.filt.fastq.gz	MPIMG	PAIRED	Solexa 1G Genome Analyzer	GENOMIC	169
cellular organisms;Eukaryota;Opisthokonta;Metazoa;Eumetazoa;Bilateria;Coelomata;Deuterostomia;Chordata;Craniata;Vertebrata;Gnathostomata;Teleostomi;Euteleostomi;Sarcopterygii;Tetrapoda;Amniota;Mammalia;Theria;Eutheria;Euarchontoglires;Primates;Haplorrhini;Simiiformes;Catarrhini;Hominoidea;Hominidae;Homininae;Homo;Homo sapiens	36	2e-10	1	cellular organisms;Bacteria;Actinobacteria;Actinobacteria;Actinobacteridae;Actinomycetales;Propionibacterineae;Propionibacteriaceae;Propionibacterium;Propionibacterium acnes	37	4e-11	ERR000953.sra.5230418	ERR000953	ERX000124	SRS000059	SRP000031	ERA000024	1000Genomes Project Pilot 1	NA12006	g1k-sc-NA12006-CEU-1	IL6_1091_1	CEU	2008-08-12	507085	13705	WGS	low coverage	no	ILLUMINA	data/NA12006/sequence_read/ERR000953.filt.fastq.gz	SC	PAIRED	Solexa 1G Genome Analyzer	GENOMIC	175
cellular organisms;Eukaryota;Opisthokonta;Metazoa;Eumetazoa;Bilateria;Coelomata;Deuterostomia;Chordata;Craniata;Vertebrata;Gnathostomata;Teleostomi;Euteleostomi;Sarcopterygii;Tetrapoda;Amniota;Mammalia;Theria;Eutheria;Euarchontoglires;Primates;Haplorrhini;Simiiformes;Catarrhini;Hominoidea;Hominidae;Homininae;Homo;Homo sapiens	51	3e-19	1	cellular organisms;Bacteria;Proteobacteria;Gammaproteobacteria;Xanthomonadales;Xanthomonadaceae;Stenotrophomonas;Stenotrophomonas maltophilia group;Stenotrophomonas maltophilia;Stenotrophomonas maltophilia R551-3	51	5e-12	ERR006345.sra.8153816	ERR006345	ERX001127	SRS000639	SRP000547	ERA000138	1000 Genomes CEPH (Utah residents with ancestry from Northern and Western Europe) population sequencing	NA12830	NA12830.22	1000G-mpimg-090515-1	CEU	2009-10-06	20819118	408218	WGS	low coverage	no	ILLUMINA	data/NA12830/sequence_read/ERR006345.filt.fastq.gz	MPIMG	PAIRED	Solexa 1G Genome Analyzer	GENOMIC	184
cellular organisms;Eukaryota;Opisthokonta;Metazoa;Eumetazoa;Bilateria;Coelomata;Deuterostomia;Chordata;Craniata;Vertebrata;Gnathostomata;Teleostomi;Euteleostomi;Sarcopterygii;Tetrapoda;Amniota;Mammalia;Theria;Eutheria;Euarchontoglires;Primates;Haplorrhini;Simiiformes;Catarrhini;Hominoidea;Hominidae;Homininae;Homo;Homo sapiens	51	8e-17	1	cellular organisms;Bacteria;Proteobacteria;Gammaproteobacteria;Enterobacteriales;Enterobacteriaceae;Dickeya;Dickeya dadantii;Dickeya dadantii Ech586	51	2e-14	ERR006347.sra.9700086	ERR006347	ERX001127	SRS000639	SRP000547	ERA000138	1000 Genomes CEPH (Utah residents with ancestry from Northern and Western Europe) population sequencing	NA12830	NA12830.22	1000G-mpimg-090515-4	CEU	2009-10-06	5770701	113151	WGS	low coverage	no	ILLUMINA	data/NA12830/sequence_read/ERR006347.filt.fastq.gz	MPIMG	PAIRED	Solexa 1G Genome Analyzer	GENOMIC	184
cellular organisms;Eukaryota;Opisthokonta;Metazoa;Eumetazoa;Bilateria;Coelomata;Deuterostomia;Chordata;Craniata;Vertebrata;Gnathostomata;Teleostomi;Euteleostomi;Sarcopterygii;Tetrapoda;Amniota;Mammalia;Theria;Eutheria;Euarchontoglires;Primates;Haplorrhini;Simiiformes;Catarrhini;Hominoidea;Hominidae;Homininae;Homo;Homo sapiens	46	3e-16	1	cellular organisms;Bacteria;Proteobacteria;Gammaproteobacteria;Xanthomonadales;Xanthomonadaceae;Stenotrophomonas;Stenotrophomonas maltophilia group;Stenotrophomonas maltophilia	51	8e-17	ERR006347.sra.9423971	ERR006347	ERX001127	SRS000639	SRP000547	ERA000138	1000 Genomes CEPH (Utah residents with ancestry from Northern and Western Europe) population sequencing	NA12830	NA12830.22	1000G-mpimg-090515-4	CEU	2009-10-06	5770701	113151	WGS	low coverage	no	ILLUMINA	data/NA12830/sequence_read/ERR006347.filt.fastq.gz	MPIMG	PAIRED	Solexa 1G Genome Analyzer	GENOMIC	184
cellular organisms;Eukaryota;Opisthokonta;Metazoa;Eumetazoa;Bilateria;Coelomata;Deuterostomia;Chordata;Craniata;Vertebrata;Gnathostomata;Teleostomi;Euteleostomi;Sarcopterygii;Tetrapoda;Amniota;Mammalia;Theria;Eutheria;Euarchontoglires;Primates;Haplorrhini;Simiiformes;Catarrhini;Hominoidea;Hominidae;Homininae;Homo;Homo sapiens	51	3e-19	1	cellular organisms;Bacteria;Proteobacteria;Gammaproteobacteria;Xanthomonadales;Xanthomonadaceae;Stenotrophomonas;Stenotrophomonas maltophilia group;Stenotrophomonas maltophilia;Stenotrophomonas maltophilia D457	51	3e-19	ERR006345.sra.3858692	ERR006345	ERX001127	SRS000639	SRP000547	ERA000138	1000 Genomes CEPH (Utah residents with ancestry from Northern and Western Europe) population sequencing	NA12830	NA12830.22	1000G-mpimg-090515-1	CEU	2009-10-06	20819118	408218	WGS	low coverage	no	ILLUMINA	data/NA12830/sequence_read/ERR006345.filt.fastq.gz	MPIMG	PAIRED	Solexa 1G Genome Analyzer	GENOMIC	184
cellular organisms;Eukaryota;Opisthokonta;Metazoa;Eumetazoa;Bilateria;Coelomata;Deuterostomia;Chordata;Craniata;Vertebrata;Gnathostomata;Teleostomi;Euteleostomi;Sarcopterygii;Tetrapoda;Amniota;Mammalia;Theria;Eutheria;Euarchontoglires;Primates;Haplorrhini;Simiiformes;Catarrhini;Hominoidea;Hominidae;Homininae;Homo;Homo sapiens	51	8e-17	1	cellular organisms;Bacteria;Proteobacteria;Gammaproteobacteria	49	1e-15	ERR006345.sra.6959566	ERR006345	ERX001127	SRS000639	SRP000547	ERA000138	1000 Genomes CEPH (Utah residents with ancestry from Northern and Western Europe) population sequencing	NA12830	NA12830.22	1000G-mpimg-090515-1	CEU	2009-10-06	20819118	408218	WGS	low coverage	no	ILLUMINA	data/NA12830/sequence_read/ERR006345.filt.fastq.gz	MPIMG	PAIRED	Solexa 1G Genome Analyzer	GENOMIC	184
cellular organisms;Eukaryota;Opisthokonta;Metazoa;Eumetazoa;Bilateria;Coelomata;Deuterostomia;Chordata;Craniata;Vertebrata;Gnathostomata;Teleostomi;Euteleostomi;Sarcopterygii;Tetrapoda;Amniota;Mammalia;Theria;Eutheria;Euarchontoglires;Primates;Haplorrhini;Simiiformes;Catarrhini;Hominoidea;Hominidae;Homininae;Homo;Homo sapiens	51	3e-19	1	cellular organisms;Bacteria;Proteobacteria;Gammaproteobacteria;Xanthomonadales;Xanthomonadaceae;Stenotrophomonas;Stenotrophomonas maltophilia group;Stenotrophomonas maltophilia;Stenotrophomonas maltophilia R551-3	51	8e-17	ERR006345.sra.7403865	ERR006345	ERX001127	SRS000639	SRP000547	ERA000138	1000 Genomes CEPH (Utah residents with ancestry from Northern and Western Europe) population sequencing	NA12830	NA12830.22	1000G-mpimg-090515-1	CEU	2009-10-06	20819118	408218	WGS	low coverage	no	ILLUMINA	data/NA12830/sequence_read/ERR006345.filt.fastq.gz	MPIMG	PAIRED	Solexa 1G Genome Analyzer	GENOMIC	184
cellular organisms;Eukaryota;Opisthokonta;Metazoa;Eumetazoa;Bilateria;Coelomata;Deuterostomia;Chordata;Craniata;Vertebrata;Gnathostomata;Teleostomi;Euteleostomi;Sarcopterygii;Tetrapoda;Amniota;Mammalia;Theria;Eutheria;Euarchontoglires;Primates;Haplorrhini;Simiiformes;Catarrhini;Hominoidea;Hominidae;Homininae;Homo;Homo sapiens	51	3e-19	2	cellular organisms;Bacteria;Proteobacteria;Gammaproteobacteria;Xanthomonadales;Xanthomonadaceae;Stenotrophomonas;Stenotrophomonas maltophilia group;Stenotrophomonas maltophilia;Stenotrophomonas maltophilia K279a	48	1e-12	ERR006354.sra.10385924	ERR006354	ERX001132	SRS000639	SRP000547	ERA000139	1000 Genomes CEPH (Utah residents with ancestry from Northern and Western Europe) population sequencing	NA12830	NA12830.22	1000G-mpimg-090522-3	CEU	2009-10-15	41581728	815328	WGS	low coverage	no	ILLUMINA	data/NA12830/sequence_read/ERR006354.filt.fastq.gz	MPIMG	PAIRED	Solexa 1G Genome Analyzer	GENOMIC	164
cellular organisms;Eukaryota;Opisthokonta;Metazoa;Eumetazoa;Bilateria;Coelomata;Deuterostomia;Chordata;Craniata;Vertebrata;Gnathostomata;Teleostomi;Euteleostomi;Sarcopterygii;Tetrapoda;Amniota;Mammalia;Theria;Eutheria;Euarchontoglires;Primates;Haplorrhini;Simiiformes;Catarrhini;Hominoidea;Hominidae;Homininae;Homo;Homo sapiens	36	2e-10	1	cellular organisms;Bacteria;Actinobacteria;Actinobacteria;Actinobacteridae;Actinomycetales;Propionibacterineae;Propionibacteriaceae;Propionibacterium;Propionibacterium acnes	36	2e-10	ERR001845.sra.5437842	ERR001845	ERX000174	SRS000092	SRP000032	ERA000070	1000Genomes Project Pilot 2	NA12892	g1k-sc-NA12892-CEU-1	IL13_327_6	CEU	2008-12-15	1871424	51984	WGS	high coverage	no	ILLUMINA	data/NA12892/sequence_read/ERR001845.filt.fastq.gz	SC	PAIRED	Solexa 1G Genome Analyzer	GENOMIC	175
cellular organisms;Eukaryota;Opisthokonta;Metazoa;Eumetazoa;Bilateria;Coelomata;Deuterostomia;Chordata;Craniata;Vertebrata;Gnathostomata;Teleostomi;Euteleostomi;Sarcopterygii;Tetrapoda;Amniota;Mammalia;Theria;Eutheria;Euarchontoglires;Primates;Haplorrhini;Simiiformes;Catarrhini;Hominoidea;Hominidae;Homininae;Homo;Homo sapiens	51	3e-19	1	cellular organisms;Bacteria;Actinobacteria;Actinobacteria;Actinobacteridae;Actinomycetales;Micrococcineae;Micrococcaceae;Micrococcus;Micrococcus luteus;Micrococcus luteus NCTC 2665	51	3e-19	ERR006390.sra.176730	ERR006390	ERX001146	SRS000640	SRP000547	ERA000144	1000 Genomes CEPH (Utah residents with ancestry from Northern and Western Europe) population sequencing	NA12842	NA12842.23	1000G-mpimg-090625-8	CEU	2009-10-06	100035786	1961486	WGS	low coverage	no	ILLUMINA	data/NA12842/sequence_read/ERR006390.filt.fastq.gz	MPIMG	PAIRED	Solexa 1G Genome Analyzer	GENOMIC	171
cellular organisms;Eukaryota;Opisthokonta;Metazoa;Eumetazoa;Bilateria;Coelomata;Deuterostomia;Chordata;Craniata;Vertebrata;Gnathostomata;Teleostomi;Euteleostomi;Sarcopterygii;Tetrapoda;Amniota;Mammalia;Theria;Eutheria;Euarchontoglires;Primates;Haplorrhini;Simiiformes;Catarrhini;Hominoidea;Hominidae;Homininae;Homo;Homo sapiens	50	1e-18	2	cellular organisms;Bacteria;Proteobacteria;Betaproteobacteria;Burkholderiales;Oxalobacteraceae;Herminiimonas;Herminiimonas arsenicoxydans	51	3e-19	ERR006345.sra.5534276	ERR006345	ERX001127	SRS000639	SRP000547	ERA000138	1000 Genomes CEPH (Utah residents with ancestry from Northern and Western Europe) population sequencing	NA12830	NA12830.22	1000G-mpimg-090515-1	CEU	2009-10-06	20819118	408218	WGS	low coverage	no	ILLUMINA	data/NA12830/sequence_read/ERR006345.filt.fastq.gz	MPIMG	PAIRED	Solexa 1G Genome Analyzer	GENOMIC	184
cellular organisms;Eukaryota;Opisthokonta;Metazoa;Eumetazoa;Bilateria;Coelomata;Deuterostomia;Chordata;Craniata;Vertebrata;Gnathostomata;Teleostomi;Euteleostomi;Sarcopterygii;Tetrapoda;Amniota;Mammalia;Theria;Eutheria;Euarchontoglires;Primates;Haplorrhini;Simiiformes;Catarrhini;Hominoidea;Hominidae;Homininae;Homo;Homo sapiens	51	3e-19	2	cellular organisms;Bacteria;Proteobacteria;Gammaproteobacteria;Enterobacteriales;Enterobacteriaceae;Serratia;Serratia proteamaculans;Serratia proteamaculans 568	44	5e-15	ERR006347.sra.1428734	ERR006347	ERX001127	SRS000639	SRP000547	ERA000138	1000 Genomes CEPH (Utah residents with ancestry from Northern and Western Europe) population sequencing	NA12830	NA12830.22	1000G-mpimg-090515-4	CEU	2009-10-06	5770701	113151	WGS	low coverage	no	ILLUMINA	data/NA12830/sequence_read/ERR006347.filt.fastq.gz	MPIMG	PAIRED	Solexa 1G Genome Analyzer	GENOMIC	184
cellular organisms;Eukaryota;Opisthokonta;Metazoa;Eumetazoa;Bilateria;Coelomata;Deuterostomia;Chordata;Craniata;Vertebrata;Gnathostomata;Teleostomi;Euteleostomi;Sarcopterygii;Tetrapoda;Amniota;Mammalia;Theria;Eutheria;Euarchontoglires;Primates;Haplorrhini;Simiiformes;Catarrhini;Hominoidea;Hominidae;Homininae;Homo;Homo sapiens	51	3e-19	1	cellular organisms;Bacteria;Actinobacteria;Actinobacteria;Actinobacteridae;Actinomycetales;Propionibacterineae;Propionibacteriaceae;Propionibacterium;Propionibacterium acnes	51	3e-19	ERR006409.sra.4702926	ERR006409	ERX001153	SRS000640	SRP000547	ERA000147	1000 Genomes CEPH (Utah residents with ancestry from Northern and Western Europe) population sequencing	NA12842	NA12842.23	1000G-mpimg-090714-8	CEU	2009-10-07	52401378	1027478	WGS	low coverage	no	ILLUMINA	data/NA12842/sequence_read/ERR006409.filt.fastq.gz	MPIMG	PAIRED	Solexa 1G Genome Analyzer	GENOMIC	178
cellular organisms;Eukaryota;Opisthokonta;Metazoa;Eumetazoa;Bilateria;Coelomata;Deuterostomia;Chordata;Craniata;Vertebrata;Gnathostomata;Teleostomi;Euteleostomi;Sarcopterygii;Tetrapoda;Amniota;Mammalia;Theria;Eutheria;Euarchontoglires;Primates;Haplorrhini;Simiiformes;Catarrhini;Hominoidea;Hominidae;Homininae;Homo;Homo sapiens	51	8e-17	2	cellular organisms;Bacteria;Proteobacteria;Gammaproteobacteria;Xanthomonadales;Xanthomonadaceae;Stenotrophomonas;Stenotrophomonas maltophilia group;Stenotrophomonas maltophilia;Stenotrophomonas maltophilia R551-3	51	8e-17	ERR006355.sra.7348786	ERR006355	ERX001132	SRS000639	SRP000547	ERA000139	1000 Genomes CEPH (Utah residents with ancestry from Northern and Western Europe) population sequencing	NA12830	NA12830.22	1000G-mpimg-090522-4	CEU	2009-10-15	66968202	1313102	WGS	low coverage	no	ILLUMINA	data/NA12830/sequence_read/ERR006355.filt.fastq.gz	MPIMG	PAIRED	Solexa 1G Genome Analyzer	GENOMIC	164
cellular organisms;Eukaryota;Opisthokonta;Metazoa;Eumetazoa;Bilateria;Coelomata;Deuterostomia;Chordata;Craniata;Vertebrata;Gnathostomata;Teleostomi;Euteleostomi;Sarcopterygii;Tetrapoda;Amniota;Mammalia;Theria;Eutheria;Euarchontoglires;Primates;Haplorrhini;Simiiformes;Catarrhini;Hominoidea;Hominidae;Homininae;Homo;Homo sapiens	51	3e-19	1	cellular organisms;Bacteria;Proteobacteria;Gammaproteobacteria;Xanthomonadales;Xanthomonadaceae;Stenotrophomonas;Stenotrophomonas maltophilia group;Stenotrophomonas maltophilia;Stenotrophomonas maltophilia K279a	44	5e-15	ERR006345.sra.399615	ERR006345	ERX001127	SRS000639	SRP000547	ERA000138	1000 Genomes CEPH (Utah residents with ancestry from Northern and Western Europe) population sequencing	NA12830	NA12830.22	1000G-mpimg-090515-1	CEU	2009-10-06	20819118	408218	WGS	low coverage	no	ILLUMINA	data/NA12830/sequence_read/ERR006345.filt.fastq.gz	MPIMG	PAIRED	Solexa 1G Genome Analyzer	GENOMIC	184
cellular organisms;Eukaryota;Opisthokonta;Metazoa;Eumetazoa;Bilateria;Coelomata;Deuterostomia;Chordata;Craniata;Vertebrata;Gnathostomata;Teleostomi;Euteleostomi;Sarcopterygii;Tetrapoda;Amniota;Mammalia;Theria;Eutheria;Euarchontoglires;Primates;Haplorrhini;Simiiformes;Catarrhini;Hominoidea;Hominidae;Homininae;Homo;Homo sapiens	51	3e-19	1	cellular organisms;Bacteria;Proteobacteria;Gammaproteobacteria;Xanthomonadales;Xanthomonadaceae;Stenotrophomonas;Stenotrophomonas maltophilia group;Stenotrophomonas maltophilia;Stenotrophomonas maltophilia R551-3	51	8e-17	ERR006347.sra.2627506	ERR006347	ERX001127	SRS000639	SRP000547	ERA000138	1000 Genomes CEPH (Utah residents with ancestry from Northern and Western Europe) population sequencing	NA12830	NA12830.22	1000G-mpimg-090515-4	CEU	2009-10-06	5770701	113151	WGS	low coverage	no	ILLUMINA	data/NA12830/sequence_read/ERR006347.filt.fastq.gz	MPIMG	PAIRED	Solexa 1G Genome Analyzer	GENOMIC	184
cellular organisms;Eukaryota;Opisthokonta;Metazoa;Eumetazoa;Bilateria;Coelomata;Deuterostomia;Chordata;Craniata;Vertebrata;Gnathostomata;Teleostomi;Euteleostomi;Sarcopterygii;Tetrapoda;Amniota;Mammalia;Theria;Eutheria;Euarchontoglires;Primates;Haplorrhini;Simiiformes;Catarrhini	37	1e-08	1	cellular organisms;Bacteria;Proteobacteria;Gammaproteobacteria;Enterobacteriales;Enterobacteriaceae;Sodalis;Sodalis glossinidius;Sodalis glossinidius str. 'morsitans'	31	1e-07	ERR000771.sra.4506147	ERR000771	ERX000123	SRS000053	SRP000031	ERA000024	1000Genomes Project Pilot 1	NA11993	g1k-sc-NA11993-CEU-1	IL14_915_7	CEU	2008-08-12	566544	15312	WGS	low coverage	no	ILLUMINA	data/NA11993/sequence_read/ERR000771.filt.fastq.gz	SC	PAIRED	Solexa 1G Genome Analyzer	GENOMIC	175
cellular organisms;Eukaryota;Opisthokonta;Metazoa;Eumetazoa;Bilateria;Coelomata;Deuterostomia;Chordata;Craniata;Vertebrata;Gnathostomata;Teleostomi;Euteleostomi;Sarcopterygii;Tetrapoda;Amniota;Mammalia;Theria;Eutheria;Euarchontoglires;Primates;Haplorrhini;Simiiformes;Catarrhini;Hominoidea;Hominidae;Homininae;Homo;Homo sapiens	51	3e-19	2	cellular organisms;Bacteria;Proteobacteria;Gammaproteobacteria;Enterobacteriales;Enterobacteriaceae;Serratia;Serratia proteamaculans;Serratia proteamaculans 568	51	3e-19	ERR006347.sra.4307289	ERR006347	ERX001127	SRS000639	SRP000547	ERA000138	1000 Genomes CEPH (Utah residents with ancestry from Northern and Western Europe) population sequencing	NA12830	NA12830.22	1000G-mpimg-090515-4	CEU	2009-10-06	5770701	113151	WGS	low coverage	no	ILLUMINA	data/NA12830/sequence_read/ERR006347.filt.fastq.gz	MPIMG	PAIRED	Solexa 1G Genome Analyzer	GENOMIC	184
cellular organisms;Eukaryota;Opisthokonta;Metazoa;Eumetazoa;Bilateria;Coelomata;Deuterostomia;Chordata;Craniata;Vertebrata;Gnathostomata;Teleostomi;Euteleostomi;Sarcopterygii;Tetrapoda;Amniota;Mammalia;Theria;Eutheria;Euarchontoglires;Primates;Haplorrhini;Simiiformes;Catarrhini;Hominoidea;Hominidae;Homininae;Homo;Homo sapiens	36	2e-10	1	cellular organisms;Bacteria;Proteobacteria;Gammaproteobacteria;Enterobacteriales;Enterobacteriaceae;Klebsiella;Klebsiella pneumoniae	36	2e-10	ERR006283.sra.8997615	ERR006283	ERX001106	SRS000643	SRP000547	ERA000129	1000 Genomes CEPH (Utah residents with ancestry from Northern and Western Europe) population sequencing	NA12890	NA12890.26	1000G-mpimg-090306-3	CEU	2009-10-06	60149520	1670820	WGS	low coverage	no	ILLUMINA	data/NA12890/sequence_read/ERR006283.filt.fastq.gz	MPIMG	PAIRED	Solexa 1G Genome Analyzer	GENOMIC	172
cellular organisms;Eukaryota;Opisthokonta;Metazoa;Eumetazoa;Bilateria;Coelomata;Deuterostomia;Chordata;Craniata;Vertebrata;Gnathostomata;Teleostomi;Euteleostomi;Sarcopterygii;Tetrapoda;Amniota;Mammalia;Theria;Eutheria;Euarchontoglires;Primates;Haplorrhini;Simiiformes;Catarrhini;Hominoidea;Hominidae;Homininae;Homo;Homo sapiens	51	3e-19	1	cellular organisms;Bacteria;Proteobacteria;Gammaproteobacteria;Enterobacteriales;Enterobacteriaceae	51	2e-14	ERR006347.sra.11055903	ERR006347	ERX001127	SRS000639	SRP000547	ERA000138	1000 Genomes CEPH (Utah residents with ancestry from Northern and Western Europe) population sequencing	NA12830	NA12830.22	1000G-mpimg-090515-4	CEU	2009-10-06	5770701	113151	WGS	low coverage	no	ILLUMINA	data/NA12830/sequence_read/ERR006347.filt.fastq.gz	MPIMG	PAIRED	Solexa 1G Genome Analyzer	GENOMIC	184
cellular organisms;Eukaryota;Opisthokonta;Metazoa;Eumetazoa;Bilateria;Coelomata;Deuterostomia;Chordata;Craniata;Vertebrata;Gnathostomata;Teleostomi;Euteleostomi;Sarcopterygii;Tetrapoda;Amniota;Mammalia;Theria;Eutheria;Euarchontoglires;Primates;Haplorrhini;Simiiformes;Catarrhini;Hominoidea;Hominidae;Homininae;Homo;Homo sapiens	51	3e-19	1	cellular organisms;Bacteria;Proteobacteria;Gammaproteobacteria;Xanthomonadales;Xanthomonadaceae;Stenotrophomonas;Stenotrophomonas maltophilia group;Stenotrophomonas maltophilia;Stenotrophomonas maltophilia K279a	44	5e-15	ERR006366.sra.10771971	ERR006366	ERX001138	SRS000639	SRP000547	ERA000141	1000 Genomes CEPH (Utah residents with ancestry from Northern and Western Europe) population sequencing	NA12830	NA12830.22	1000G-mpimg-090608-1	CEU	2009-10-06	58676877	1150527	WGS	low coverage	no	ILLUMINA	data/NA12830/sequence_read/ERR006366.filt.fastq.gz	MPIMG	PAIRED	Solexa 1G Genome Analyzer	GENOMIC	145
cellular organisms;Eukaryota;Opisthokonta;Metazoa;Eumetazoa;Bilateria;Coelomata;Deuterostomia;Chordata;Craniata;Vertebrata;Gnathostomata;Teleostomi;Euteleostomi;Sarcopterygii;Tetrapoda;Amniota;Mammalia;Theria;Eutheria;Euarchontoglires;Primates;Haplorrhini;Simiiformes;Catarrhini;Hominoidea	51	3e-19	1	cellular organisms;Bacteria;Proteobacteria;Gammaproteobacteria;Enterobacteriales;Enterobacteriaceae	51	8e-17	ERR006366.sra.13643989	ERR006366	ERX001138	SRS000639	SRP000547	ERA000141	1000 Genomes CEPH (Utah residents with ancestry from Northern and Western Europe) population sequencing	NA12830	NA12830.22	1000G-mpimg-090608-1	CEU	2009-10-06	58676877	1150527	WGS	low coverage	no	ILLUMINA	data/NA12830/sequence_read/ERR006366.filt.fastq.gz	MPIMG	PAIRED	Solexa 1G Genome Analyzer	GENOMIC	145
cellular organisms;Eukaryota;Opisthokonta;Metazoa;Eumetazoa;Bilateria;Coelomata;Deuterostomia;Chordata;Craniata;Vertebrata;Gnathostomata;Teleostomi;Euteleostomi;Sarcopterygii;Tetrapoda;Amniota;Mammalia;Theria;Eutheria;Euarchontoglires;Primates;Haplorrhini;Simiiformes;Catarrhini;Hominoidea;Hominidae;Homininae;Homo;Homo sapiens	51	3e-19	1	cellular organisms;Bacteria;Proteobacteria;Gammaproteobacteria;Enterobacteriales;Enterobacteriaceae;Serratia;Serratia proteamaculans;Serratia proteamaculans 568	51	3e-19	ERR006347.sra.9445664	ERR006347	ERX001127	SRS000639	SRP000547	ERA000138	1000 Genomes CEPH (Utah residents with ancestry from Northern and Western Europe) population sequencing	NA12830	NA12830.22	1000G-mpimg-090515-4	CEU	2009-10-06	5770701	113151	WGS	low coverage	no	ILLUMINA	data/NA12830/sequence_read/ERR006347.filt.fastq.gz	MPIMG	PAIRED	Solexa 1G Genome Analyzer	GENOMIC	184
cellular organisms;Eukaryota;Opisthokonta;Metazoa;Eumetazoa;Bilateria;Coelomata;Deuterostomia;Chordata;Craniata;Vertebrata;Gnathostomata;Teleostomi;Euteleostomi;Sarcopterygii;Tetrapoda;Amniota;Mammalia;Theria;Eutheria;Euarchontoglires;Primates;Haplorrhini;Simiiformes;Catarrhini;Hominoidea;Hominidae;Homininae;Homo;Homo sapiens	51	3e-19	1	cellular organisms;Bacteria;Proteobacteria;Gammaproteobacteria;Xanthomonadales;Xanthomonadaceae;Stenotrophomonas;Stenotrophomonas maltophilia group;Stenotrophomonas maltophilia;Stenotrophomonas maltophilia K279a	51	2e-14	ERR006345.sra.3277319	ERR006345	ERX001127	SRS000639	SRP000547	ERA000138	1000 Genomes CEPH (Utah residents with ancestry from Northern and Western Europe) population sequencing	NA12830	NA12830.22	1000G-mpimg-090515-1	CEU	2009-10-06	20819118	408218	WGS	low coverage	no	ILLUMINA	data/NA12830/sequence_read/ERR006345.filt.fastq.gz	MPIMG	PAIRED	Solexa 1G Genome Analyzer	GENOMIC	184
cellular organisms;Eukaryota;Opisthokonta;Metazoa;Eumetazoa;Bilateria;Coelomata;Deuterostomia;Chordata;Craniata;Vertebrata;Gnathostomata;Teleostomi;Euteleostomi;Sarcopterygii;Tetrapoda;Amniota;Mammalia;Theria;Eutheria;Euarchontoglires;Primates;Haplorrhini;Simiiformes;Catarrhini;Hominoidea;Hominidae;Homininae;Homo;Homo sapiens	36	2e-10	1	cellular organisms;Bacteria;Actinobacteria;Actinobacteria;Actinobacteridae;Actinomycetales;Propionibacterineae;Propionibacteriaceae;Propionibacterium;Propionibacterium acnes	36	2e-10	ERR001833.sra.604993	ERR001833	ERX000174	SRS000092	SRP000032	ERA000070	1000Genomes Project Pilot 2	NA12892	g1k-sc-NA12892-CEU-1	IL9_322_8	CEU	2008-12-15	963792	26772	WGS	high coverage	no	ILLUMINA	data/NA12892/sequence_read/ERR001833.filt.fastq.gz	SC	PAIRED	Solexa 1G Genome Analyzer	GENOMIC	175
cellular organisms;Eukaryota;Opisthokonta;Metazoa;Eumetazoa;Bilateria;Coelomata;Deuterostomia;Chordata;Craniata;Vertebrata;Gnathostomata;Teleostomi;Euteleostomi;Sarcopterygii;Tetrapoda;Amniota;Mammalia;Theria;Eutheria;Euarchontoglires;Primates;Haplorrhini;Simiiformes;Catarrhini;Hominoidea;Hominidae;Homininae;Homo;Homo sapiens	51	3e-19	1	cellular organisms;Bacteria;Actinobacteria;Actinobacteria;Actinobacteridae;Actinomycetales;Propionibacterineae;Propionibacteriaceae;Propionibacterium;Propionibacterium acnes	51	3e-19	ERR006347.sra.256522	ERR006347	ERX001127	SRS000639	SRP000547	ERA000138	1000 Genomes CEPH (Utah residents with ancestry from Northern and Western Europe) population sequencing	NA12830	NA12830.22	1000G-mpimg-090515-4	CEU	2009-10-06	5770701	113151	WGS	low coverage	no	ILLUMINA	data/NA12830/sequence_read/ERR006347.filt.fastq.gz	MPIMG	PAIRED	Solexa 1G Genome Analyzer	GENOMIC	184
cellular organisms;Eukaryota;Opisthokonta;Metazoa;Eumetazoa;Bilateria;Coelomata;Deuterostomia;Chordata;Craniata;Vertebrata;Gnathostomata;Teleostomi;Euteleostomi;Sarcopterygii;Tetrapoda;Amniota;Mammalia;Theria;Eutheria;Euarchontoglires;Primates;Haplorrhini;Simiiformes;Catarrhini;Hominoidea;Hominidae;Homininae;Homo;Homo sapiens	51	3e-19	1	cellular organisms;Bacteria;Proteobacteria;Gammaproteobacteria;Xanthomonadales;Xanthomonadaceae;Stenotrophomonas;Stenotrophomonas maltophilia group;Stenotrophomonas maltophilia	51	5e-12	ERR006347.sra.5795865	ERR006347	ERX001127	SRS000639	SRP000547	ERA000138	1000 Genomes CEPH (Utah residents with ancestry from Northern and Western Europe) population sequencing	NA12830	NA12830.22	1000G-mpimg-090515-4	CEU	2009-10-06	5770701	113151	WGS	low coverage	no	ILLUMINA	data/NA12830/sequence_read/ERR006347.filt.fastq.gz	MPIMG	PAIRED	Solexa 1G Genome Analyzer	GENOMIC	184
cellular organisms;Eukaryota;Opisthokonta;Metazoa;Eumetazoa;Bilateria;Coelomata;Deuterostomia;Chordata;Craniata;Vertebrata;Gnathostomata;Teleostomi;Euteleostomi;Sarcopterygii;Tetrapoda;Amniota;Mammalia;Theria;Eutheria;Euarchontoglires;Primates;Haplorrhini;Simiiformes;Catarrhini;Hominoidea;Hominidae;Homininae;Homo;Homo sapiens	51	3e-19	1	cellular organisms;Bacteria;Proteobacteria;Gammaproteobacteria;Enterobacteriales;Enterobacteriaceae;Erwinia	47	5e-12	ERR006354.sra.1172705	ERR006354	ERX001132	SRS000639	SRP000547	ERA000139	1000 Genomes CEPH (Utah residents with ancestry from Northern and Western Europe) population sequencing	NA12830	NA12830.22	1000G-mpimg-090522-3	CEU	2009-10-15	41581728	815328	WGS	low coverage	no	ILLUMINA	data/NA12830/sequence_read/ERR006354.filt.fastq.gz	MPIMG	PAIRED	Solexa 1G Genome Analyzer	GENOMIC	164
cellular organisms;Eukaryota;Opisthokonta;Metazoa;Eumetazoa;Bilateria;Coelomata;Deuterostomia;Chordata;Craniata;Vertebrata;Gnathostomata;Teleostomi;Euteleostomi;Sarcopterygii;Tetrapoda;Amniota;Mammalia;Theria;Eutheria;Euarchontoglires;Primates;Haplorrhini;Simiiformes;Catarrhini;Hominoidea;Hominidae;Homininae;Homo;Homo sapiens	51	8e-17	1	cellular organisms;Bacteria;Proteobacteria;Gammaproteobacteria;Xanthomonadales;Xanthomonadaceae;Stenotrophomonas;Stenotrophomonas maltophilia group;Stenotrophomonas maltophilia	51	3e-19	ERR006347.sra.1700189	ERR006347	ERX001127	SRS000639	SRP000547	ERA000138	1000 Genomes CEPH (Utah residents with ancestry from Northern and Western Europe) population sequencing	NA12830	NA12830.22	1000G-mpimg-090515-4	CEU	2009-10-06	5770701	113151	WGS	low coverage	no	ILLUMINA	data/NA12830/sequence_read/ERR006347.filt.fastq.gz	MPIMG	PAIRED	Solexa 1G Genome Analyzer	GENOMIC	184
cellular organisms;Eukaryota;Opisthokonta;Metazoa;Eumetazoa;Bilateria;Coelomata;Deuterostomia;Chordata;Craniata;Vertebrata;Gnathostomata;Teleostomi;Euteleostomi;Sarcopterygii;Tetrapoda;Amniota;Mammalia;Theria;Eutheria;Euarchontoglires;Primates;Haplorrhini;Simiiformes;Catarrhini;Hominoidea;Hominidae;Homininae;Homo;Homo sapiens	51	3e-19	1	cellular organisms;Bacteria;Proteobacteria;Gammaproteobacteria;Enterobacteriales;Enterobacteriaceae;Serratia	51	8e-17	ERR006347.sra.3834247	ERR006347	ERX001127	SRS000639	SRP000547	ERA000138	1000 Genomes CEPH (Utah residents with ancestry from Northern and Western Europe) population sequencing	NA12830	NA12830.22	1000G-mpimg-090515-4	CEU	2009-10-06	5770701	113151	WGS	low coverage	no	ILLUMINA	data/NA12830/sequence_read/ERR006347.filt.fastq.gz	MPIMG	PAIRED	Solexa 1G Genome Analyzer	GENOMIC	184
cellular organisms;Eukaryota;Opisthokonta;Metazoa;Eumetazoa;Bilateria;Coelomata;Deuterostomia;Chordata;Craniata;Vertebrata;Gnathostomata;Teleostomi;Euteleostomi;Sarcopterygii;Tetrapoda;Amniota;Mammalia;Theria;Eutheria;Euarchontoglires;Primates;Haplorrhini;Simiiformes;Catarrhini;Hominoidea;Hominidae;Homininae;Homo;Homo sapiens	51	3e-19	1	cellular organisms;Bacteria;Actinobacteria;Actinobacteria;Actinobacteridae;Actinomycetales;Propionibacterineae;Propionibacteriaceae;Propionibacterium;Propionibacterium acnes	51	3e-19	ERR006353.sra.1546641	ERR006353	ERX001132	SRS000639	SRP000547	ERA000139	1000 Genomes CEPH (Utah residents with ancestry from Northern and Western Europe) population sequencing	NA12830	NA12830.22	1000G-mpimg-090522-2	CEU	2009-10-15	8527659	167209	WGS	low coverage	no	ILLUMINA	data/NA12830/sequence_read/ERR006353.filt.fastq.gz	MPIMG	PAIRED	Solexa 1G Genome Analyzer	GENOMIC	164
cellular organisms;Eukaryota;Opisthokonta;Metazoa;Eumetazoa;Bilateria;Coelomata;Deuterostomia;Chordata;Craniata;Vertebrata;Gnathostomata;Teleostomi;Euteleostomi;Sarcopterygii;Tetrapoda;Amniota;Mammalia;Theria;Eutheria;Euarchontoglires;Primates;Haplorrhini;Simiiformes;Catarrhini;Hominoidea;Hominidae;Homininae;Homo;Homo sapiens	51	3e-19	1	cellular organisms;Bacteria;Proteobacteria;Gammaproteobacteria;Xanthomonadales;Xanthomonadaceae;Stenotrophomonas;Stenotrophomonas maltophilia group;Stenotrophomonas maltophilia;Stenotrophomonas maltophilia K279a	50	3e-16	ERR006353.sra.2564387	ERR006353	ERX001132	SRS000639	SRP000547	ERA000139	1000 Genomes CEPH (Utah residents with ancestry from Northern and Western Europe) population sequencing	NA12830	NA12830.22	1000G-mpimg-090522-2	CEU	2009-10-15	8527659	167209	WGS	low coverage	no	ILLUMINA	data/NA12830/sequence_read/ERR006353.filt.fastq.gz	MPIMG	PAIRED	Solexa 1G Genome Analyzer	GENOMIC	164
cellular organisms;Eukaryota;Opisthokonta;Metazoa;Eumetazoa;Bilateria;Coelomata;Deuterostomia;Chordata;Craniata;Vertebrata;Gnathostomata;Teleostomi;Euteleostomi;Sarcopterygii;Tetrapoda;Amniota;Mammalia;Theria;Eutheria;Euarchontoglires;Primates;Haplorrhini;Simiiformes;Catarrhini;Hominoidea;Hominidae;Homininae;Homo;Homo sapiens	51	3e-19	1	cellular organisms;Bacteria;Proteobacteria;Gammaproteobacteria;Xanthomonadales;Xanthomonadaceae;Stenotrophomonas;Stenotrophomonas maltophilia group;Stenotrophomonas maltophilia;Stenotrophomonas maltophilia JV3	51	3e-19	ERR006346.sra.15869966	ERR006346	ERX001127	SRS000639	SRP000547	ERA000138	1000 Genomes CEPH (Utah residents with ancestry from Northern and Western Europe) population sequencing	NA12830	NA12830.22	1000G-mpimg-090515-2	CEU	2009-10-06	10555929	206979	WGS	low coverage	no	ILLUMINA	data/NA12830/sequence_read/ERR006346.filt.fastq.gz	MPIMG	PAIRED	Solexa 1G Genome Analyzer	GENOMIC	184
cellular organisms;Eukaryota;Opisthokonta;Metazoa;Eumetazoa;Bilateria;Coelomata;Deuterostomia;Chordata;Craniata;Vertebrata;Gnathostomata;Teleostomi;Euteleostomi;Sarcopterygii;Tetrapoda;Amniota;Mammalia;Theria;Eutheria;Euarchontoglires;Primates;Haplorrhini;Simiiformes;Catarrhini;Hominoidea;Hominidae;Homininae;Homo;Homo sapiens	51	3e-19	2	cellular organisms;Bacteria;Proteobacteria;Gammaproteobacteria;Xanthomonadales;Xanthomonadaceae;Stenotrophomonas;Stenotrophomonas maltophilia group;Stenotrophomonas maltophilia	51	3e-19	ERR006347.sra.10561979	ERR006347	ERX001127	SRS000639	SRP000547	ERA000138	1000 Genomes CEPH (Utah residents with ancestry from Northern and Western Europe) population sequencing	NA12830	NA12830.22	1000G-mpimg-090515-4	CEU	2009-10-06	5770701	113151	WGS	low coverage	no	ILLUMINA	data/NA12830/sequence_read/ERR006347.filt.fastq.gz	MPIMG	PAIRED	Solexa 1G Genome Analyzer	GENOMIC	184
cellular organisms;Eukaryota;Opisthokonta;Metazoa;Eumetazoa;Bilateria;Coelomata;Deuterostomia;Chordata;Craniata;Vertebrata;Gnathostomata;Teleostomi;Euteleostomi;Sarcopterygii;Tetrapoda;Amniota;Mammalia;Theria;Eutheria;Euarchontoglires;Primates;Haplorrhini;Simiiformes;Catarrhini;Hominoidea;Hominidae;Homininae;Homo;Homo sapiens	51	8e-17	1	cellular organisms;Bacteria;Proteobacteria;Gammaproteobacteria;Enterobacteriales;Enterobacteriaceae	41	3e-13	ERR006355.sra.4865075	ERR006355	ERX001132	SRS000639	SRP000547	ERA000139	1000 Genomes CEPH (Utah residents with ancestry from Northern and Western Europe) population sequencing	NA12830	NA12830.22	1000G-mpimg-090522-4	CEU	2009-10-15	66968202	1313102	WGS	low coverage	no	ILLUMINA	data/NA12830/sequence_read/ERR006355.filt.fastq.gz	MPIMG	PAIRED	Solexa 1G Genome Analyzer	GENOMIC	164
cellular organisms;Eukaryota;Opisthokonta;Metazoa;Eumetazoa;Bilateria;Coelomata;Deuterostomia;Chordata;Craniata;Vertebrata;Gnathostomata;Teleostomi;Euteleostomi;Sarcopterygii;Tetrapoda;Amniota;Mammalia;Theria;Eutheria;Euarchontoglires;Primates;Haplorrhini;Simiiformes;Catarrhini;Hominoidea;Hominidae;Homininae;Homo;Homo sapiens	51	2e-14	1	cellular organisms;Bacteria;Proteobacteria;Gammaproteobacteria;Enterobacteriales;Enterobacteriaceae;Serratia	51	8e-17	ERR006345.sra.8279550	ERR006345	ERX001127	SRS000639	SRP000547	ERA000138	1000 Genomes CEPH (Utah residents with ancestry from Northern and Western Europe) population sequencing	NA12830	NA12830.22	1000G-mpimg-090515-1	CEU	2009-10-06	20819118	408218	WGS	low coverage	no	ILLUMINA	data/NA12830/sequence_read/ERR006345.filt.fastq.gz	MPIMG	PAIRED	Solexa 1G Genome Analyzer	GENOMIC	184
cellular organisms;Eukaryota;Opisthokonta;Metazoa;Eumetazoa;Bilateria;Coelomata;Deuterostomia;Chordata;Craniata;Vertebrata;Gnathostomata;Teleostomi;Euteleostomi;Sarcopterygii;Tetrapoda;Amniota;Mammalia;Theria;Eutheria;Euarchontoglires;Primates;Haplorrhini;Simiiformes;Catarrhini;Hominoidea;Hominidae;Homininae;Homo;Homo sapiens	51	2e-14	1	cellular organisms;Bacteria;Proteobacteria;Gammaproteobacteria;Xanthomonadales;Xanthomonadaceae;Stenotrophomonas;Stenotrophomonas maltophilia group;Stenotrophomonas maltophilia	51	5e-12	ERR006347.sra.3184810	ERR006347	ERX001127	SRS000639	SRP000547	ERA000138	1000 Genomes CEPH (Utah residents with ancestry from Northern and Western Europe) population sequencing	NA12830	NA12830.22	1000G-mpimg-090515-4	CEU	2009-10-06	5770701	113151	WGS	low coverage	no	ILLUMINA	data/NA12830/sequence_read/ERR006347.filt.fastq.gz	MPIMG	PAIRED	Solexa 1G Genome Analyzer	GENOMIC	184
cellular organisms;Eukaryota;Opisthokonta;Metazoa;Eumetazoa;Bilateria;Coelomata;Deuterostomia;Chordata;Craniata;Vertebrata;Gnathostomata;Teleostomi;Euteleostomi;Sarcopterygii;Tetrapoda;Amniota;Mammalia;Theria;Eutheria;Euarchontoglires;Primates;Haplorrhini;Simiiformes;Catarrhini;Hominoidea;Hominidae;Homininae;Homo;Homo sapiens	51	3e-19	1	cellular organisms;Bacteria;Proteobacteria;Gammaproteobacteria;Xanthomonadales;Xanthomonadaceae;Stenotrophomonas;Stenotrophomonas maltophilia group;Stenotrophomonas maltophilia;Stenotrophomonas maltophilia R551-3	50	8e-14	ERR006355.sra.5305730	ERR006355	ERX001132	SRS000639	SRP000547	ERA000139	1000 Genomes CEPH (Utah residents with ancestry from Northern and Western Europe) population sequencing	NA12830	NA12830.22	1000G-mpimg-090522-4	CEU	2009-10-15	66968202	1313102	WGS	low coverage	no	ILLUMINA	data/NA12830/sequence_read/ERR006355.filt.fastq.gz	MPIMG	PAIRED	Solexa 1G Genome Analyzer	GENOMIC	164
cellular organisms;Eukaryota;Opisthokonta;Metazoa;Eumetazoa;Bilateria;Coelomata;Deuterostomia;Chordata;Craniata;Vertebrata;Gnathostomata;Teleostomi;Euteleostomi;Sarcopterygii;Tetrapoda;Amniota;Mammalia;Theria;Eutheria;Euarchontoglires;Primates;Haplorrhini;Simiiformes;Catarrhini;Hominoidea;Hominidae;Homininae;Homo;Homo sapiens	51	3e-19	1	cellular organisms;Bacteria;Proteobacteria;Gammaproteobacteria;Xanthomonadales;Xanthomonadaceae;Stenotrophomonas;Stenotrophomonas maltophilia group;Stenotrophomonas maltophilia;Stenotrophomonas maltophilia K279a	51	2e-14	ERR006346.sra.2245138	ERR006346	ERX001127	SRS000639	SRP000547	ERA000138	1000 Genomes CEPH (Utah residents with ancestry from Northern and Western Europe) population sequencing	NA12830	NA12830.22	1000G-mpimg-090515-2	CEU	2009-10-06	10555929	206979	WGS	low coverage	no	ILLUMINA	data/NA12830/sequence_read/ERR006346.filt.fastq.gz	MPIMG	PAIRED	Solexa 1G Genome Analyzer	GENOMIC	184
cellular organisms;Eukaryota;Opisthokonta;Metazoa;Eumetazoa;Bilateria;Coelomata;Deuterostomia;Chordata;Craniata;Vertebrata;Gnathostomata;Teleostomi;Euteleostomi;Sarcopterygii;Tetrapoda;Amniota;Mammalia;Theria;Eutheria;Euarchontoglires;Primates;Haplorrhini;Simiiformes;Catarrhini;Hominoidea;Hominidae;Homininae;Homo;Homo sapiens	51	3e-19	3	cellular organisms;Bacteria;Proteobacteria;Gammaproteobacteria;Pseudomonadales;Pseudomonadaceae;Pseudomonas;Pseudomonas aeruginosa group;Pseudomonas aeruginosa	51	3e-19	ERR006347.sra.9046724	ERR006347	ERX001127	SRS000639	SRP000547	ERA000138	1000 Genomes CEPH (Utah residents with ancestry from Northern and Western Europe) population sequencing	NA12830	NA12830.22	1000G-mpimg-090515-4	CEU	2009-10-06	5770701	113151	WGS	low coverage	no	ILLUMINA	data/NA12830/sequence_read/ERR006347.filt.fastq.gz	MPIMG	PAIRED	Solexa 1G Genome Analyzer	GENOMIC	184
cellular organisms;Eukaryota;Opisthokonta;Metazoa;Eumetazoa;Bilateria;Coelomata;Deuterostomia;Chordata;Craniata;Vertebrata;Gnathostomata;Teleostomi;Euteleostomi;Sarcopterygii;Tetrapoda;Amniota;Mammalia;Theria;Eutheria;Euarchontoglires;Primates;Haplorrhini;Simiiformes;Catarrhini;Hominoidea;Hominidae;Homininae;Homo;Homo sapiens	51	3e-19	1	cellular organisms;Bacteria;Proteobacteria;Gammaproteobacteria;Enterobacteriales;Enterobacteriaceae;Serratia	51	8e-17	ERR006355.sra.4133396	ERR006355	ERX001132	SRS000639	SRP000547	ERA000139	1000 Genomes CEPH (Utah residents with ancestry from Northern and Western Europe) population sequencing	NA12830	NA12830.22	1000G-mpimg-090522-4	CEU	2009-10-15	66968202	1313102	WGS	low coverage	no	ILLUMINA	data/NA12830/sequence_read/ERR006355.filt.fastq.gz	MPIMG	PAIRED	Solexa 1G Genome Analyzer	GENOMIC	164
cellular organisms;Eukaryota;Opisthokonta;Metazoa;Eumetazoa;Bilateria;Coelomata;Deuterostomia;Chordata;Craniata;Vertebrata;Gnathostomata;Teleostomi;Euteleostomi;Sarcopterygii;Tetrapoda;Amniota;Mammalia;Theria;Eutheria;Euarchontoglires;Primates;Haplorrhini;Simiiformes;Catarrhini;Hominoidea;Hominidae;Homininae;Homo;Homo sapiens	51	3e-19	1	cellular organisms;Bacteria;Proteobacteria;Gammaproteobacteria;Enterobacteriales;Enterobacteriaceae;Serratia	51	2e-14	ERR006345.sra.7555274	ERR006345	ERX001127	SRS000639	SRP000547	ERA000138	1000 Genomes CEPH (Utah residents with ancestry from Northern and Western Europe) population sequencing	NA12830	NA12830.22	1000G-mpimg-090515-1	CEU	2009-10-06	20819118	408218	WGS	low coverage	no	ILLUMINA	data/NA12830/sequence_read/ERR006345.filt.fastq.gz	MPIMG	PAIRED	Solexa 1G Genome Analyzer	GENOMIC	184
cellular organisms;Eukaryota;Opisthokonta;Metazoa;Eumetazoa;Bilateria;Coelomata;Deuterostomia;Chordata;Craniata;Vertebrata;Gnathostomata;Teleostomi;Euteleostomi;Sarcopterygii;Tetrapoda;Amniota;Mammalia;Theria;Eutheria;Euarchontoglires;Primates;Haplorrhini;Simiiformes;Catarrhini;Hominoidea;Hominidae;Homininae;Homo;Homo sapiens	51	3e-19	1	cellular organisms;Bacteria	47	8e-17	ERR007479.sra.2752839	ERR007479	ERX002149	SRS001261	SRP000547	ERA000162	1000 Genomes CEPH (Utah residents with ancestry from Northern and Western Europe) population sequencing	NA11932	NA11932.13	1000G-mpimg-091009-8	CEU	2009-11-20	189625395	3718145	WGS	low coverage	no	ILLUMINA	data/NA11932/sequence_read/ERR007479.filt.fastq.gz	MPIMG	PAIRED	Solexa 1G Genome Analyzer	GENOMIC	178
cellular organisms;Eukaryota;Opisthokonta;Metazoa;Eumetazoa;Bilateria;Coelomata;Deuterostomia;Chordata;Craniata;Vertebrata;Gnathostomata;Teleostomi;Euteleostomi;Sarcopterygii;Tetrapoda;Amniota;Mammalia;Theria;Eutheria;Euarchontoglires;Primates;Haplorrhini;Simiiformes;Catarrhini;Hominoidea;Hominidae;Homininae;Homo;Homo sapiens	51	3e-19	1	cellular organisms;Bacteria;Proteobacteria;Gammaproteobacteria;Enterobacteriales;Enterobacteriaceae;Serratia	51	8e-17	ERR006345.sra.6615579	ERR006345	ERX001127	SRS000639	SRP000547	ERA000138	1000 Genomes CEPH (Utah residents with ancestry from Northern and Western Europe) population sequencing	NA12830	NA12830.22	1000G-mpimg-090515-1	CEU	2009-10-06	20819118	408218	WGS	low coverage	no	ILLUMINA	data/NA12830/sequence_read/ERR006345.filt.fastq.gz	MPIMG	PAIRED	Solexa 1G Genome Analyzer	GENOMIC	184
cellular organisms;Eukaryota;Opisthokonta;Metazoa;Eumetazoa;Bilateria;Coelomata;Deuterostomia;Chordata;Craniata;Vertebrata;Gnathostomata;Teleostomi;Euteleostomi;Sarcopterygii;Tetrapoda;Amniota;Mammalia;Theria;Eutheria;Euarchontoglires;Primates;Haplorrhini;Simiiformes;Catarrhini;Hominoidea;Hominidae;Homininae;Homo;Homo sapiens	51	3e-19	2	cellular organisms;Bacteria;Actinobacteria;Actinobacteria;Actinobacteridae;Actinomycetales;Propionibacterineae;Propionibacteriaceae;Propionibacterium;Propionibacterium acnes	51	8e-17	ERR006390.sra.20125900	ERR006390	ERX001146	SRS000640	SRP000547	ERA000144	1000 Genomes CEPH (Utah residents with ancestry from Northern and Western Europe) population sequencing	NA12842	NA12842.23	1000G-mpimg-090625-8	CEU	2009-10-06	100035786	1961486	WGS	low coverage	no	ILLUMINA	data/NA12842/sequence_read/ERR006390.filt.fastq.gz	MPIMG	PAIRED	Solexa 1G Genome Analyzer	GENOMIC	171
cellular organisms;Eukaryota;Opisthokonta;Metazoa;Eumetazoa;Bilateria;Coelomata;Deuterostomia;Chordata;Craniata;Vertebrata;Gnathostomata;Teleostomi;Euteleostomi;Sarcopterygii;Tetrapoda;Amniota;Mammalia;Theria;Eutheria;Euarchontoglires;Primates;Haplorrhini;Simiiformes;Catarrhini;Hominoidea;Hominidae;Homininae;Homo;Homo sapiens	51	3e-19	1	cellular organisms;Bacteria;Proteobacteria;Gammaproteobacteria;Enterobacteriales;Enterobacteriaceae;Escherichia;Escherichia coli	51	3e-19	ERR007482.sra.11465777	ERR007482	ERX002151	SRS000614	SRP000547	ERA000163	1000 Genomes CEPH (Utah residents with ancestry from Northern and Western Europe) population sequencing	NA11930	NA11930.12	1000G-mpimg-091023-6	CEU	2009-11-20	60199533	1180383	WGS	low coverage	no	ILLUMINA	data/NA11930/sequence_read/ERR007482.filt.fastq.gz	MPIMG	PAIRED	Solexa 1G Genome Analyzer	GENOMIC	201
cellular organisms;Eukaryota;Opisthokonta;Metazoa;Eumetazoa;Bilateria;Coelomata;Deuterostomia;Chordata;Craniata;Vertebrata;Gnathostomata;Teleostomi;Euteleostomi;Sarcopterygii;Tetrapoda;Amniota;Mammalia;Theria;Eutheria;Euarchontoglires;Primates;Haplorrhini;Simiiformes;Catarrhini;Hominoidea;Hominidae;Homininae;Homo;Homo sapiens	51	3e-19	2	cellular organisms;Bacteria;Proteobacteria;Gammaproteobacteria;Enterobacteriales;Enterobacteriaceae;Serratia;Serratia proteamaculans;Serratia proteamaculans 568	51	2e-14	ERR006345.sra.1973792	ERR006345	ERX001127	SRS000639	SRP000547	ERA000138	1000 Genomes CEPH (Utah residents with ancestry from Northern and Western Europe) population sequencing	NA12830	NA12830.22	1000G-mpimg-090515-1	CEU	2009-10-06	20819118	408218	WGS	low coverage	no	ILLUMINA	data/NA12830/sequence_read/ERR006345.filt.fastq.gz	MPIMG	PAIRED	Solexa 1G Genome Analyzer	GENOMIC	184
cellular organisms;Eukaryota;Opisthokonta;Metazoa;Eumetazoa;Bilateria;Coelomata;Deuterostomia;Chordata;Craniata;Vertebrata;Gnathostomata;Teleostomi;Euteleostomi;Sarcopterygii;Tetrapoda;Amniota;Mammalia;Theria;Eutheria;Euarchontoglires;Primates;Haplorrhini;Simiiformes;Catarrhini;Hominoidea;Hominidae;Homininae;Homo;Homo sapiens	51	3e-19	1	cellular organisms;Bacteria;Actinobacteria;Actinobacteria;Actinobacteridae;Actinomycetales;Propionibacterineae;Propionibacteriaceae;Propionibacterium;Propionibacterium acnes	51	3e-19	ERR006345.sra.5396294	ERR006345	ERX001127	SRS000639	SRP000547	ERA000138	1000 Genomes CEPH (Utah residents with ancestry from Northern and Western Europe) population sequencing	NA12830	NA12830.22	1000G-mpimg-090515-1	CEU	2009-10-06	20819118	408218	WGS	low coverage	no	ILLUMINA	data/NA12830/sequence_read/ERR006345.filt.fastq.gz	MPIMG	PAIRED	Solexa 1G Genome Analyzer	GENOMIC	184
cellular organisms;Eukaryota;Opisthokonta;Metazoa;Eumetazoa;Bilateria;Coelomata;Deuterostomia;Chordata;Craniata;Vertebrata;Gnathostomata;Teleostomi;Euteleostomi;Sarcopterygii;Tetrapoda;Amniota;Mammalia;Theria;Eutheria;Euarchontoglires;Primates;Haplorrhini;Simiiformes;Catarrhini;Hominoidea;Hominidae	47	8e-17	1	cellular organisms;Bacteria;Proteobacteria;Gammaproteobacteria;Xanthomonadales;Xanthomonadaceae;Stenotrophomonas;Stenotrophomonas maltophilia group;Stenotrophomonas maltophilia	51	2e-14	ERR006347.sra.8285238	ERR006347	ERX001127	SRS000639	SRP000547	ERA000138	1000 Genomes CEPH (Utah residents with ancestry from Northern and Western Europe) population sequencing	NA12830	NA12830.22	1000G-mpimg-090515-4	CEU	2009-10-06	5770701	113151	WGS	low coverage	no	ILLUMINA	data/NA12830/sequence_read/ERR006347.filt.fastq.gz	MPIMG	PAIRED	Solexa 1G Genome Analyzer	GENOMIC	184
cellular organisms;Eukaryota;Opisthokonta;Metazoa;Eumetazoa;Bilateria;Coelomata;Deuterostomia;Chordata;Craniata;Vertebrata;Gnathostomata;Teleostomi;Euteleostomi;Sarcopterygii;Tetrapoda;Amniota;Mammalia;Theria;Eutheria;Euarchontoglires;Primates;Haplorrhini;Simiiformes;Catarrhini;Hominoidea;Hominidae;Homininae;Homo;Homo sapiens	51	3e-19	1	cellular organisms;Bacteria;Proteobacteria;Gammaproteobacteria;Xanthomonadales;Xanthomonadaceae;Stenotrophomonas;Stenotrophomonas maltophilia group;Stenotrophomonas maltophilia;Stenotrophomonas maltophilia JV3	51	3e-19	ERR006347.sra.2583007	ERR006347	ERX001127	SRS000639	SRP000547	ERA000138	1000 Genomes CEPH (Utah residents with ancestry from Northern and Western Europe) population sequencing	NA12830	NA12830.22	1000G-mpimg-090515-4	CEU	2009-10-06	5770701	113151	WGS	low coverage	no	ILLUMINA	data/NA12830/sequence_read/ERR006347.filt.fastq.gz	MPIMG	PAIRED	Solexa 1G Genome Analyzer	GENOMIC	184
cellular organisms;Eukaryota;Opisthokonta;Metazoa;Eumetazoa;Bilateria;Coelomata;Deuterostomia;Chordata;Craniata;Vertebrata;Gnathostomata;Teleostomi;Euteleostomi;Sarcopterygii;Tetrapoda;Amniota;Mammalia;Theria;Eutheria;Euarchontoglires;Primates;Haplorrhini;Simiiformes;Catarrhini;Hominoidea;Hominidae;Homininae;Homo;Homo sapiens	51	8e-17	1	cellular organisms;Bacteria;Proteobacteria	51	8e-17	ERR006345.sra.7306037	ERR006345	ERX001127	SRS000639	SRP000547	ERA000138	1000 Genomes CEPH (Utah residents with ancestry from Northern and Western Europe) population sequencing	NA12830	NA12830.22	1000G-mpimg-090515-1	CEU	2009-10-06	20819118	408218	WGS	low coverage	no	ILLUMINA	data/NA12830/sequence_read/ERR006345.filt.fastq.gz	MPIMG	PAIRED	Solexa 1G Genome Analyzer	GENOMIC	184
cellular organisms;Eukaryota;Opisthokonta;Metazoa;Eumetazoa;Bilateria;Coelomata;Deuterostomia;Chordata;Craniata;Vertebrata;Gnathostomata;Teleostomi;Euteleostomi;Sarcopterygii;Tetrapoda;Amniota;Mammalia;Theria;Eutheria;Euarchontoglires;Primates;Haplorrhini;Simiiformes;Catarrhini;Hominoidea;Hominidae;Homininae;Homo;Homo sapiens	36	2e-10	1	cellular organisms;Bacteria;Actinobacteria;Actinobacteria;Actinobacteridae;Actinomycetales;Propionibacterineae;Propionibacteriaceae;Propionibacterium;Propionibacterium acnes	36	2e-10	ERR001723.sra.3274455	ERR001723	ERX000170	SRS000090	SRP000032	ERA000068	1000Genomes Project Pilot 2	NA12878	g1k-sc-NA12878-CEU-1	IL11_266_7	CEU	2008-12-15	827172	22977	WGS	high coverage	no	ILLUMINA	data/NA12878/sequence_read/ERR001723.filt.fastq.gz	SC	PAIRED	Solexa 1G Genome Analyzer	GENOMIC	175
cellular organisms;Eukaryota;Opisthokonta;Metazoa;Eumetazoa;Bilateria;Coelomata;Deuterostomia;Chordata;Craniata;Vertebrata;Gnathostomata;Teleostomi;Euteleostomi;Sarcopterygii;Tetrapoda;Amniota;Mammalia;Theria;Eutheria;Euarchontoglires;Primates;Haplorrhini;Simiiformes;Catarrhini;Hominoidea;Hominidae;Homininae;Homo;Homo sapiens	36	2e-10	1	cellular organisms;Bacteria;Proteobacteria;Gammaproteobacteria;Xanthomonadales;Xanthomonadaceae;Stenotrophomonas;Stenotrophomonas maltophilia group;Stenotrophomonas maltophilia;Stenotrophomonas maltophilia R551-3	32	9e-06	ERR006278.sra.7460553	ERR006278	ERX001103	SRS000642	SRP000547	ERA000128	1000 Genomes CEPH (Utah residents with ancestry from Northern and Western Europe) population sequencing	NA12889	NA12889.25	1000G-mpimg-090226-6	CEU	2009-10-06	82250568	2284738	WGS	low coverage	no	ILLUMINA	data/NA12889/sequence_read/ERR006278.filt.fastq.gz	MPIMG	PAIRED	Solexa 1G Genome Analyzer	GENOMIC	183
cellular organisms;Eukaryota;Opisthokonta;Metazoa;Eumetazoa;Bilateria;Coelomata;Deuterostomia;Chordata;Craniata;Vertebrata;Gnathostomata;Teleostomi;Euteleostomi;Sarcopterygii;Tetrapoda;Amniota;Mammalia;Theria;Eutheria;Euarchontoglires;Primates;Haplorrhini;Simiiformes;Catarrhini;Hominoidea;Hominidae;Homininae;Homo;Homo sapiens	51	3e-19	1	cellular organisms;Bacteria	51	3e-19	ERR006356.sra.1268747	ERR006356	ERX001132	SRS000639	SRP000547	ERA000139	1000 Genomes CEPH (Utah residents with ancestry from Northern and Western Europe) population sequencing	NA12830	NA12830.22	1000G-mpimg-090522-5	CEU	2009-10-15	32761380	642380	WGS	low coverage	no	ILLUMINA	data/NA12830/sequence_read/ERR006356.filt.fastq.gz	MPIMG	PAIRED	Solexa 1G Genome Analyzer	GENOMIC	164
cellular organisms;Eukaryota;Opisthokonta;Metazoa;Eumetazoa;Bilateria;Coelomata;Deuterostomia;Chordata;Craniata;Vertebrata;Gnathostomata;Teleostomi;Euteleostomi;Sarcopterygii;Tetrapoda;Amniota;Mammalia;Theria;Eutheria;Euarchontoglires;Primates;Haplorrhini;Simiiformes;Catarrhini;Hominoidea;Hominidae;Homininae;Homo;Homo sapiens	51	8e-17	1	cellular organisms;Bacteria;Actinobacteria;Actinobacteria;Actinobacteridae;Actinomycetales;Propionibacterineae;Propionibacteriaceae;Propionibacterium;Propionibacterium acnes	51	3e-19	ERR006347.sra.7663713	ERR006347	ERX001127	SRS000639	SRP000547	ERA000138	1000 Genomes CEPH (Utah residents with ancestry from Northern and Western Europe) population sequencing	NA12830	NA12830.22	1000G-mpimg-090515-4	CEU	2009-10-06	5770701	113151	WGS	low coverage	no	ILLUMINA	data/NA12830/sequence_read/ERR006347.filt.fastq.gz	MPIMG	PAIRED	Solexa 1G Genome Analyzer	GENOMIC	184
cellular organisms;Eukaryota;Opisthokonta;Metazoa;Eumetazoa;Bilateria;Coelomata;Deuterostomia;Chordata;Craniata;Vertebrata;Gnathostomata;Teleostomi;Euteleostomi;Sarcopterygii;Tetrapoda;Amniota;Mammalia;Theria;Eutheria;Euarchontoglires;Primates;Haplorrhini;Simiiformes;Catarrhini;Hominoidea;Hominidae;Homininae;Homo;Homo sapiens	32	4e-08	1	cellular organisms;Bacteria;Actinobacteria;Actinobacteria;Actinobacteridae;Actinomycetales;Propionibacterineae;Propionibacteriaceae;Propionibacterium;Propionibacterium acnes	37	1e-08	ERR000769.sra.6324319	ERR000769	ERX000123	SRS000053	SRP000031	ERA000024	1000Genomes Project Pilot 1	NA11993	g1k-sc-NA11993-CEU-1	IL14_915_5	CEU	2008-08-12	785140	21220	WGS	low coverage	no	ILLUMINA	data/NA11993/sequence_read/ERR000769.filt.fastq.gz	SC	PAIRED	Solexa 1G Genome Analyzer	GENOMIC	175
cellular organisms;Eukaryota;Opisthokonta;Metazoa;Eumetazoa;Bilateria;Coelomata;Deuterostomia;Chordata;Craniata;Vertebrata;Gnathostomata;Teleostomi;Euteleostomi;Sarcopterygii;Tetrapoda;Amniota;Mammalia;Theria;Eutheria;Euarchontoglires;Primates;Haplorrhini;Simiiformes;Catarrhini;Hominoidea;Hominidae;Homininae;Homo;Homo sapiens	51	3e-19	1	cellular organisms;Bacteria;Actinobacteria;Actinobacteria;Actinobacteridae;Actinomycetales;Propionibacterineae;Propionibacteriaceae;Propionibacterium;Propionibacterium acnes	51	3e-19	ERR006345.sra.7156655	ERR006345	ERX001127	SRS000639	SRP000547	ERA000138	1000 Genomes CEPH (Utah residents with ancestry from Northern and Western Europe) population sequencing	NA12830	NA12830.22	1000G-mpimg-090515-1	CEU	2009-10-06	20819118	408218	WGS	low coverage	no	ILLUMINA	data/NA12830/sequence_read/ERR006345.filt.fastq.gz	MPIMG	PAIRED	Solexa 1G Genome Analyzer	GENOMIC	184
cellular organisms;Eukaryota;Opisthokonta;Metazoa;Eumetazoa;Bilateria;Coelomata;Deuterostomia;Chordata;Craniata;Vertebrata;Gnathostomata;Teleostomi;Euteleostomi;Sarcopterygii;Tetrapoda;Amniota;Mammalia;Theria;Eutheria;Euarchontoglires;Primates;Haplorrhini;Simiiformes;Catarrhini;Hominoidea;Hominidae;Homininae;Homo;Homo sapiens	51	3e-19	1	cellular organisms;Bacteria;Proteobacteria;Gammaproteobacteria;Xanthomonadales;Xanthomonadaceae;Stenotrophomonas;Stenotrophomonas maltophilia group;Stenotrophomonas maltophilia;Stenotrophomonas maltophilia K279a	49	1e-15	ERR006347.sra.6252387	ERR006347	ERX001127	SRS000639	SRP000547	ERA000138	1000 Genomes CEPH (Utah residents with ancestry from Northern and Western Europe) population sequencing	NA12830	NA12830.22	1000G-mpimg-090515-4	CEU	2009-10-06	5770701	113151	WGS	low coverage	no	ILLUMINA	data/NA12830/sequence_read/ERR006347.filt.fastq.gz	MPIMG	PAIRED	Solexa 1G Genome Analyzer	GENOMIC	184
cellular organisms;Eukaryota;Opisthokonta;Metazoa;Eumetazoa;Bilateria;Coelomata;Deuterostomia;Chordata;Craniata;Vertebrata;Gnathostomata;Teleostomi;Euteleostomi;Sarcopterygii;Tetrapoda;Amniota;Mammalia;Theria;Eutheria;Euarchontoglires;Primates;Haplorrhini;Simiiformes;Catarrhini;Hominoidea;Hominidae;Homininae;Homo;Homo sapiens	51	8e-17	1	cellular organisms;Bacteria;Proteobacteria;Gammaproteobacteria;Enterobacteriales;Enterobacteriaceae;Serratia	51	8e-17	ERR006347.sra.9953335	ERR006347	ERX001127	SRS000639	SRP000547	ERA000138	1000 Genomes CEPH (Utah residents with ancestry from Northern and Western Europe) population sequencing	NA12830	NA12830.22	1000G-mpimg-090515-4	CEU	2009-10-06	5770701	113151	WGS	low coverage	no	ILLUMINA	data/NA12830/sequence_read/ERR006347.filt.fastq.gz	MPIMG	PAIRED	Solexa 1G Genome Analyzer	GENOMIC	184
cellular organisms;Eukaryota;Opisthokonta;Metazoa;Eumetazoa;Bilateria;Coelomata;Deuterostomia;Chordata;Craniata;Vertebrata;Gnathostomata;Teleostomi;Euteleostomi;Sarcopterygii;Tetrapoda;Amniota;Mammalia;Theria;Eutheria;Euarchontoglires;Primates;Haplorrhini;Simiiformes;Catarrhini;Hominoidea;Hominidae;Homininae;Homo;Homo sapiens	51	3e-19	1	cellular organisms;Bacteria;Proteobacteria;Gammaproteobacteria;Enterobacteriales;Enterobacteriaceae;Klebsiella;Klebsiella pneumoniae;Klebsiella pneumoniae 342	51	2e-14	ERR006347.sra.3414301	ERR006347	ERX001127	SRS000639	SRP000547	ERA000138	1000 Genomes CEPH (Utah residents with ancestry from Northern and Western Europe) population sequencing	NA12830	NA12830.22	1000G-mpimg-090515-4	CEU	2009-10-06	5770701	113151	WGS	low coverage	no	ILLUMINA	data/NA12830/sequence_read/ERR006347.filt.fastq.gz	MPIMG	PAIRED	Solexa 1G Genome Analyzer	GENOMIC	184
cellular organisms;Eukaryota;Opisthokonta;Metazoa;Eumetazoa;Bilateria;Coelomata;Deuterostomia;Chordata;Craniata;Vertebrata;Gnathostomata;Teleostomi;Euteleostomi;Sarcopterygii;Tetrapoda;Amniota;Mammalia;Theria;Eutheria;Euarchontoglires;Primates;Haplorrhini;Simiiformes;Catarrhini;Hominoidea;Hominidae;Homininae;Homo;Homo sapiens	52	5e-15	1	cellular organisms;Bacteria;Proteobacteria;Gammaproteobacteria;Enterobacteriales;Enterobacteriaceae;Serratia;Serratia proteamaculans;Serratia proteamaculans 568	48	2e-17	ERR006347.sra.6124572	ERR006347	ERX001127	SRS000639	SRP000547	ERA000138	1000 Genomes CEPH (Utah residents with ancestry from Northern and Western Europe) population sequencing	NA12830	NA12830.22	1000G-mpimg-090515-4	CEU	2009-10-06	5770701	113151	WGS	low coverage	no	ILLUMINA	data/NA12830/sequence_read/ERR006347.filt.fastq.gz	MPIMG	PAIRED	Solexa 1G Genome Analyzer	GENOMIC	184
cellular organisms;Eukaryota;Opisthokonta;Metazoa;Eumetazoa;Bilateria;Coelomata;Deuterostomia;Chordata;Craniata;Vertebrata;Gnathostomata;Teleostomi;Euteleostomi;Sarcopterygii;Tetrapoda;Amniota;Mammalia;Theria;Eutheria;Euarchontoglires;Primates;Haplorrhini;Simiiformes;Catarrhini;Hominoidea;Hominidae;Homininae;Homo;Homo sapiens	51	3e-19	2	cellular organisms;Bacteria;Proteobacteria;Gammaproteobacteria;Xanthomonadales;Xanthomonadaceae;Stenotrophomonas;Stenotrophomonas maltophilia group;Stenotrophomonas maltophilia;Stenotrophomonas maltophilia JV3	47	8e-17	ERR006347.sra.3489637	ERR006347	ERX001127	SRS000639	SRP000547	ERA000138	1000 Genomes CEPH (Utah residents with ancestry from Northern and Western Europe) population sequencing	NA12830	NA12830.22	1000G-mpimg-090515-4	CEU	2009-10-06	5770701	113151	WGS	low coverage	no	ILLUMINA	data/NA12830/sequence_read/ERR006347.filt.fastq.gz	MPIMG	PAIRED	Solexa 1G Genome Analyzer	GENOMIC	184
cellular organisms;Eukaryota;Opisthokonta;Metazoa;Eumetazoa;Bilateria;Coelomata;Deuterostomia;Chordata;Craniata;Vertebrata;Gnathostomata;Teleostomi;Euteleostomi;Sarcopterygii;Tetrapoda;Amniota;Mammalia;Theria;Eutheria;Euarchontoglires;Primates;Haplorrhini;Simiiformes;Catarrhini;Hominoidea;Hominidae;Homininae;Homo;Homo sapiens	51	3e-19	1	cellular organisms;Bacteria;Proteobacteria;Betaproteobacteria;Burkholderiales;Comamonadaceae;Acidovorax;Acidovorax sp. JS42	51	3e-19	ERR006397.sra.9364796	ERR006397	ERX001149	SRS000640	SRP000547	ERA000145	1000 Genomes CEPH (Utah residents with ancestry from Northern and Western Europe) population sequencing	NA12842	NA12842.23	1000G-mpimg-090703-7	CEU	2009-10-06	65595333	1286183	WGS	low coverage	no	ILLUMINA	data/NA12842/sequence_read/ERR006397.filt.fastq.gz	MPIMG	PAIRED	Solexa 1G Genome Analyzer	GENOMIC	169
cellular organisms;Eukaryota;Opisthokonta;Metazoa;Eumetazoa;Bilateria;Coelomata;Deuterostomia;Chordata;Craniata;Vertebrata;Gnathostomata;Teleostomi;Euteleostomi;Sarcopterygii;Tetrapoda;Amniota;Mammalia;Theria;Eutheria;Euarchontoglires;Primates;Haplorrhini;Simiiformes;Catarrhini;Hominoidea;Hominidae;Homininae;Homo;Homo sapiens	49	5e-18	1	cellular organisms;Bacteria;Proteobacteria;Gammaproteobacteria;Xanthomonadales;Xanthomonadaceae;Stenotrophomonas;Stenotrophomonas maltophilia group;Stenotrophomonas maltophilia;Stenotrophomonas maltophilia JV3	51	3e-19	ERR006345.sra.7369905	ERR006345	ERX001127	SRS000639	SRP000547	ERA000138	1000 Genomes CEPH (Utah residents with ancestry from Northern and Western Europe) population sequencing	NA12830	NA12830.22	1000G-mpimg-090515-1	CEU	2009-10-06	20819118	408218	WGS	low coverage	no	ILLUMINA	data/NA12830/sequence_read/ERR006345.filt.fastq.gz	MPIMG	PAIRED	Solexa 1G Genome Analyzer	GENOMIC	184
cellular organisms;Eukaryota;Opisthokonta;Metazoa;Eumetazoa;Bilateria;Coelomata;Deuterostomia;Chordata;Craniata;Vertebrata;Gnathostomata;Teleostomi;Euteleostomi;Sarcopterygii;Tetrapoda;Amniota;Mammalia;Theria;Eutheria;Euarchontoglires;Primates;Haplorrhini;Simiiformes;Catarrhini	51	3e-19	1	cellular organisms;Bacteria;Proteobacteria;Gammaproteobacteria;Xanthomonadales;Xanthomonadaceae;Stenotrophomonas;Stenotrophomonas maltophilia group;Stenotrophomonas maltophilia;Stenotrophomonas maltophilia K279a	50	8e-14	ERR006347.sra.7832370	ERR006347	ERX001127	SRS000639	SRP000547	ERA000138	1000 Genomes CEPH (Utah residents with ancestry from Northern and Western Europe) population sequencing	NA12830	NA12830.22	1000G-mpimg-090515-4	CEU	2009-10-06	5770701	113151	WGS	low coverage	no	ILLUMINA	data/NA12830/sequence_read/ERR006347.filt.fastq.gz	MPIMG	PAIRED	Solexa 1G Genome Analyzer	GENOMIC	184
cellular organisms;Eukaryota;Opisthokonta;Metazoa;Eumetazoa;Bilateria;Coelomata;Deuterostomia;Chordata;Craniata;Vertebrata;Gnathostomata;Teleostomi;Euteleostomi;Sarcopterygii;Tetrapoda;Amniota;Mammalia;Theria;Eutheria;Euarchontoglires;Primates;Haplorrhini;Simiiformes;Catarrhini;Hominoidea;Hominidae;Homininae;Homo;Homo sapiens	51	3e-19	1	cellular organisms;Bacteria;Proteobacteria;Alphaproteobacteria;Rhodobacterales;Rhodobacteraceae;Dinoroseobacter;Dinoroseobacter shibae;Dinoroseobacter shibae DFL 12	49	3e-13	ERR006355.sra.3153687	ERR006355	ERX001132	SRS000639	SRP000547	ERA000139	1000 Genomes CEPH (Utah residents with ancestry from Northern and Western Europe) population sequencing	NA12830	NA12830.22	1000G-mpimg-090522-4	CEU	2009-10-15	66968202	1313102	WGS	low coverage	no	ILLUMINA	data/NA12830/sequence_read/ERR006355.filt.fastq.gz	MPIMG	PAIRED	Solexa 1G Genome Analyzer	GENOMIC	164
cellular organisms;Eukaryota;Opisthokonta;Metazoa;Eumetazoa;Bilateria;Coelomata;Deuterostomia;Chordata;Craniata;Vertebrata;Gnathostomata;Teleostomi;Euteleostomi;Sarcopterygii;Tetrapoda;Amniota;Mammalia;Theria;Eutheria;Euarchontoglires;Primates;Haplorrhini;Simiiformes;Catarrhini;Hominoidea;Hominidae;Homininae;Homo;Homo sapiens	37	4e-11	1	cellular organisms;Bacteria;Proteobacteria;Gammaproteobacteria;Enterobacteriales;Enterobacteriaceae;Escherichia;Escherichia coli	37	4e-11	ERR000938.sra.4890277	ERR000938	ERX000070	SRS000063	SRP000031	ERA000024	1000Genomes Project Pilot 1	NA12144	g1k-sc-NA12144-CEU-1	IL5_951_8	CEU	2008-08-12	1083767	29291	WGS	low coverage	no	ILLUMINA	data/NA12144/sequence_read/ERR000938.filt.fastq.gz	SC	PAIRED	Solexa 1G Genome Analyzer	GENOMIC	175
cellular organisms;Eukaryota;Opisthokonta;Metazoa;Eumetazoa;Bilateria;Coelomata;Deuterostomia;Chordata;Craniata;Vertebrata;Gnathostomata;Teleostomi;Euteleostomi;Sarcopterygii;Tetrapoda;Amniota;Mammalia;Theria;Eutheria;Euarchontoglires;Primates;Haplorrhini;Simiiformes;Catarrhini;Hominoidea;Hominidae;Homininae;Homo;Homo sapiens	51	8e-17	1	cellular organisms;Bacteria;Actinobacteria;Actinobacteria;Actinobacteridae;Actinomycetales	51	8e-17	ERR006347.sra.9479798	ERR006347	ERX001127	SRS000639	SRP000547	ERA000138	1000 Genomes CEPH (Utah residents with ancestry from Northern and Western Europe) population sequencing	NA12830	NA12830.22	1000G-mpimg-090515-4	CEU	2009-10-06	5770701	113151	WGS	low coverage	no	ILLUMINA	data/NA12830/sequence_read/ERR006347.filt.fastq.gz	MPIMG	PAIRED	Solexa 1G Genome Analyzer	GENOMIC	184
cellular organisms;Eukaryota;Opisthokonta;Metazoa;Eumetazoa;Bilateria;Coelomata;Deuterostomia;Chordata;Craniata;Vertebrata;Gnathostomata;Teleostomi;Euteleostomi;Sarcopterygii;Tetrapoda;Amniota;Mammalia;Theria;Eutheria;Euarchontoglires;Primates;Haplorrhini;Simiiformes;Catarrhini;Hominoidea;Hominidae;Homininae;Homo;Homo sapiens	51	3e-19	1	cellular organisms;Bacteria;Proteobacteria;Gammaproteobacteria;Enterobacteriales;Enterobacteriaceae;Cronobacter;Cronobacter sakazakii;Cronobacter sakazakii ATCC BAA-894	48	1e-12	ERR006345.sra.9764626	ERR006345	ERX001127	SRS000639	SRP000547	ERA000138	1000 Genomes CEPH (Utah residents with ancestry from Northern and Western Europe) population sequencing	NA12830	NA12830.22	1000G-mpimg-090515-1	CEU	2009-10-06	20819118	408218	WGS	low coverage	no	ILLUMINA	data/NA12830/sequence_read/ERR006345.filt.fastq.gz	MPIMG	PAIRED	Solexa 1G Genome Analyzer	GENOMIC	184
cellular organisms;Eukaryota;Opisthokonta;Metazoa;Eumetazoa;Bilateria;Coelomata;Deuterostomia;Chordata;Craniata;Vertebrata;Gnathostomata;Teleostomi;Euteleostomi;Sarcopterygii;Tetrapoda;Amniota;Mammalia;Theria;Eutheria;Euarchontoglires;Primates;Haplorrhini;Simiiformes;Catarrhini;Hominoidea;Hominidae;Homininae;Homo;Homo sapiens	51	3e-19	1	cellular organisms;Bacteria;Proteobacteria;Gammaproteobacteria;Xanthomonadales;Xanthomonadaceae;Stenotrophomonas;Stenotrophomonas maltophilia group;Stenotrophomonas maltophilia;Stenotrophomonas maltophilia K279a	50	3e-16	ERR006347.sra.4458515	ERR006347	ERX001127	SRS000639	SRP000547	ERA000138	1000 Genomes CEPH (Utah residents with ancestry from Northern and Western Europe) population sequencing	NA12830	NA12830.22	1000G-mpimg-090515-4	CEU	2009-10-06	5770701	113151	WGS	low coverage	no	ILLUMINA	data/NA12830/sequence_read/ERR006347.filt.fastq.gz	MPIMG	PAIRED	Solexa 1G Genome Analyzer	GENOMIC	184
cellular organisms;Eukaryota;Opisthokonta;Metazoa;Eumetazoa;Bilateria;Coelomata;Deuterostomia;Chordata;Craniata;Vertebrata;Gnathostomata;Teleostomi;Euteleostomi;Sarcopterygii;Tetrapoda;Amniota;Mammalia;Theria;Eutheria;Euarchontoglires;Primates;Haplorrhini;Simiiformes;Catarrhini;Hominoidea;Hominidae;Homininae;Homo;Homo sapiens	51	3e-19	1	cellular organisms;Bacteria;Proteobacteria;Gammaproteobacteria;Xanthomonadales;Xanthomonadaceae;Stenotrophomonas;Stenotrophomonas maltophilia group;Stenotrophomonas maltophilia;Stenotrophomonas maltophilia JV3	47	8e-17	ERR006343.sra.9686556	ERR006343	ERX001125	SRS000639	SRP000547	ERA000137	1000 Genomes CEPH (Utah residents with ancestry from Northern and Western Europe) population sequencing	NA12830	NA12830.22_2-3	1000G-mpimg-090508-3	CEU	2009-10-06	95492553	1872403	WGS	low coverage	no	ILLUMINA	data/NA12830/sequence_read/ERR006343.filt.fastq.gz	MPIMG	PAIRED	Solexa 1G Genome Analyzer	GENOMIC	159
cellular organisms;Eukaryota;Opisthokonta;Metazoa;Eumetazoa;Bilateria;Coelomata;Deuterostomia;Chordata;Craniata;Vertebrata;Gnathostomata;Teleostomi;Euteleostomi;Sarcopterygii;Tetrapoda;Amniota;Mammalia;Theria;Eutheria;Euarchontoglires;Primates;Haplorrhini;Simiiformes;Catarrhini;Hominoidea;Hominidae;Homininae;Homo;Homo sapiens	50	3e-16	1	cellular organisms;Bacteria;Proteobacteria;Gammaproteobacteria;Xanthomonadales;Xanthomonadaceae;Stenotrophomonas;Stenotrophomonas maltophilia group;Stenotrophomonas maltophilia;Stenotrophomonas maltophilia JV3	51	2e-14	ERR006345.sra.7962362	ERR006345	ERX001127	SRS000639	SRP000547	ERA000138	1000 Genomes CEPH (Utah residents with ancestry from Northern and Western Europe) population sequencing	NA12830	NA12830.22	1000G-mpimg-090515-1	CEU	2009-10-06	20819118	408218	WGS	low coverage	no	ILLUMINA	data/NA12830/sequence_read/ERR006345.filt.fastq.gz	MPIMG	PAIRED	Solexa 1G Genome Analyzer	GENOMIC	184
cellular organisms;Eukaryota;Opisthokonta;Metazoa;Eumetazoa;Bilateria;Coelomata;Deuterostomia;Chordata;Craniata;Vertebrata;Gnathostomata;Teleostomi;Euteleostomi;Sarcopterygii;Tetrapoda;Amniota;Mammalia;Theria;Eutheria;Euarchontoglires;Primates;Haplorrhini;Simiiformes;Catarrhini;Hominoidea;Hominidae;Homininae;Homo;Homo sapiens	47	8e-17	1	cellular organisms;Bacteria;Proteobacteria;Gammaproteobacteria;Enterobacteriales;Enterobacteriaceae;Serratia;Serratia proteamaculans;Serratia proteamaculans 568	48	5e-15	ERR006347.sra.10376990	ERR006347	ERX001127	SRS000639	SRP000547	ERA000138	1000 Genomes CEPH (Utah residents with ancestry from Northern and Western Europe) population sequencing	NA12830	NA12830.22	1000G-mpimg-090515-4	CEU	2009-10-06	5770701	113151	WGS	low coverage	no	ILLUMINA	data/NA12830/sequence_read/ERR006347.filt.fastq.gz	MPIMG	PAIRED	Solexa 1G Genome Analyzer	GENOMIC	184
cellular organisms;Eukaryota;Opisthokonta;Metazoa;Eumetazoa;Bilateria;Coelomata;Deuterostomia;Chordata;Craniata;Vertebrata;Gnathostomata;Teleostomi;Euteleostomi;Sarcopterygii;Tetrapoda;Amniota;Mammalia;Theria;Eutheria;Euarchontoglires;Primates;Haplorrhini;Simiiformes;Catarrhini;Hominoidea;Hominidae;Homininae;Homo;Homo sapiens	51	3e-19	1	cellular organisms;Bacteria;Proteobacteria;Gammaproteobacteria;Xanthomonadales;Xanthomonadaceae;Stenotrophomonas;Stenotrophomonas maltophilia group;Stenotrophomonas maltophilia;Stenotrophomonas maltophilia R551-3	48	1e-12	ERR006356.sra.2338681	ERR006356	ERX001132	SRS000639	SRP000547	ERA000139	1000 Genomes CEPH (Utah residents with ancestry from Northern and Western Europe) population sequencing	NA12830	NA12830.22	1000G-mpimg-090522-5	CEU	2009-10-15	32761380	642380	WGS	low coverage	no	ILLUMINA	data/NA12830/sequence_read/ERR006356.filt.fastq.gz	MPIMG	PAIRED	Solexa 1G Genome Analyzer	GENOMIC	164
cellular organisms;Eukaryota;Opisthokonta;Metazoa;Eumetazoa;Bilateria;Coelomata;Deuterostomia;Chordata;Craniata;Vertebrata;Gnathostomata;Teleostomi;Euteleostomi;Sarcopterygii;Tetrapoda;Amniota;Mammalia;Theria;Eutheria;Euarchontoglires;Primates;Haplorrhini;Simiiformes;Catarrhini;Hominoidea;Hominidae;Homininae;Homo;Homo sapiens	51	8e-17	2	cellular organisms;Bacteria;Proteobacteria;Gammaproteobacteria;Xanthomonadales;Xanthomonadaceae;Stenotrophomonas;Stenotrophomonas maltophilia group;Stenotrophomonas maltophilia	51	2e-14	ERR006347.sra.11078385	ERR006347	ERX001127	SRS000639	SRP000547	ERA000138	1000 Genomes CEPH (Utah residents with ancestry from Northern and Western Europe) population sequencing	NA12830	NA12830.22	1000G-mpimg-090515-4	CEU	2009-10-06	5770701	113151	WGS	low coverage	no	ILLUMINA	data/NA12830/sequence_read/ERR006347.filt.fastq.gz	MPIMG	PAIRED	Solexa 1G Genome Analyzer	GENOMIC	184
cellular organisms;Eukaryota;Opisthokonta;Metazoa;Eumetazoa;Bilateria;Coelomata;Deuterostomia;Chordata;Craniata;Vertebrata;Gnathostomata;Teleostomi;Euteleostomi;Sarcopterygii;Tetrapoda;Amniota;Mammalia;Theria;Eutheria;Euarchontoglires;Primates;Haplorrhini;Simiiformes;Catarrhini	37	4e-11	1	cellular organisms;Bacteria;Actinobacteria;Actinobacteria;Actinobacteridae;Actinomycetales;Propionibacterineae;Propionibacteriaceae;Propionibacterium;Propionibacterium acnes	35	2e-07	ERR000831.sra.1221281	ERR000831	ERX000066	SRS000033	SRP000031	ERA000024	1000Genomes Project Pilot 1	NA07000	g1k-sc-NA07000-CEU-1	IL4_993_2	CEU	2008-08-12	1461574	39502	WGS	low coverage	no	ILLUMINA	data/NA07000/sequence_read/ERR000831.filt.fastq.gz	SC	PAIRED	Solexa 1G Genome Analyzer	GENOMIC	175
cellular organisms;Eukaryota;Opisthokonta;Metazoa;Eumetazoa;Bilateria;Coelomata;Deuterostomia;Chordata;Craniata;Vertebrata;Gnathostomata;Teleostomi;Euteleostomi;Sarcopterygii;Tetrapoda;Amniota;Mammalia;Theria;Eutheria;Euarchontoglires;Primates;Haplorrhini;Simiiformes;Catarrhini;Hominoidea;Hominidae;Homininae;Homo;Homo sapiens	51	3e-19	1	cellular organisms;Bacteria;Proteobacteria;Gammaproteobacteria;Enterobacteriales;Enterobacteriaceae	51	3e-19	ERR000581.sra.1251473	ERR000581	ERX000061	SRS000073	SRP000031	ERA000019	1000Genomes Project Pilot 1	NA12717	CT1921	200x51x51-080819_EAS192_0051_FC30C4RAAXX_5	CEU	2008-08-27	30632079	600629	WGS	low coverage	no	ILLUMINA	data/NA12717/sequence_read/ERR000581.filt.fastq.gz	ILLUMINA	PAIRED	Illumina Genome Analyzer II	GENOMIC	200
cellular organisms;Eukaryota;Opisthokonta;Metazoa;Eumetazoa;Bilateria;Coelomata;Deuterostomia;Chordata;Craniata;Vertebrata;Gnathostomata;Teleostomi;Euteleostomi;Sarcopterygii;Tetrapoda;Amniota;Mammalia;Theria;Eutheria;Euarchontoglires;Primates;Haplorrhini;Simiiformes;Catarrhini;Hominoidea;Hominidae;Homininae;Homo;Homo sapiens	47	8e-17	1	cellular organisms;Bacteria;Proteobacteria;Gammaproteobacteria;Enterobacteriales;Enterobacteriaceae;Dickeya;Dickeya dadantii;Dickeya dadantii Ech703	48	1e-12	ERR006354.sra.7033736	ERR006354	ERX001132	SRS000639	SRP000547	ERA000139	1000 Genomes CEPH (Utah residents with ancestry from Northern and Western Europe) population sequencing	NA12830	NA12830.22	1000G-mpimg-090522-3	CEU	2009-10-15	41581728	815328	WGS	low coverage	no	ILLUMINA	data/NA12830/sequence_read/ERR006354.filt.fastq.gz	MPIMG	PAIRED	Solexa 1G Genome Analyzer	GENOMIC	164
cellular organisms;Eukaryota;Opisthokonta;Metazoa;Eumetazoa;Bilateria;Coelomata;Deuterostomia;Chordata;Craniata;Vertebrata;Gnathostomata;Teleostomi;Euteleostomi;Sarcopterygii;Tetrapoda;Amniota;Mammalia;Theria;Eutheria;Euarchontoglires;Primates;Haplorrhini;Simiiformes;Catarrhini;Hominoidea;Hominidae;Homininae;Homo;Homo sapiens	49	1e-15	1	cellular organisms;Bacteria;Proteobacteria;Gammaproteobacteria;Enterobacteriales;Enterobacteriaceae	51	3e-19	ERR007484.sra.4410	ERR007484	ERX002152	SRS001261	SRP000547	ERA000163	1000 Genomes CEPH (Utah residents with ancestry from Northern and Western Europe) population sequencing	NA11932	NA11932.13	1000G-mpimg-091023-8	CEU	2009-11-20	58795146	1152846	WGS	low coverage	no	ILLUMINA	data/NA11932/sequence_read/ERR007484.filt.fastq.gz	MPIMG	PAIRED	Solexa 1G Genome Analyzer	GENOMIC	204
cellular organisms;Eukaryota;Opisthokonta;Metazoa;Eumetazoa;Bilateria;Coelomata;Deuterostomia;Chordata;Craniata;Vertebrata;Gnathostomata;Teleostomi;Euteleostomi;Sarcopterygii;Tetrapoda;Amniota;Mammalia;Theria;Eutheria;Euarchontoglires;Primates;Haplorrhini;Simiiformes;Catarrhini;Hominoidea;Hominidae;Homininae;Homo;Homo sapiens	51	3e-19	1	cellular organisms;Bacteria;Proteobacteria;Gammaproteobacteria;Enterobacteriales;Enterobacteriaceae;Serratia;Serratia proteamaculans;Serratia proteamaculans 568	51	5e-12	ERR006347.sra.7883889	ERR006347	ERX001127	SRS000639	SRP000547	ERA000138	1000 Genomes CEPH (Utah residents with ancestry from Northern and Western Europe) population sequencing	NA12830	NA12830.22	1000G-mpimg-090515-4	CEU	2009-10-06	5770701	113151	WGS	low coverage	no	ILLUMINA	data/NA12830/sequence_read/ERR006347.filt.fastq.gz	MPIMG	PAIRED	Solexa 1G Genome Analyzer	GENOMIC	184
cellular organisms;Eukaryota;Opisthokonta;Metazoa;Eumetazoa;Bilateria;Coelomata;Deuterostomia;Chordata;Craniata;Vertebrata;Gnathostomata;Teleostomi;Euteleostomi;Sarcopterygii;Tetrapoda;Amniota;Mammalia;Theria;Eutheria;Euarchontoglires;Primates;Haplorrhini;Simiiformes;Catarrhini;Hominoidea;Hominidae;Homininae;Homo;Homo sapiens	51	3e-19	1	cellular organisms;Bacteria;Proteobacteria;Gammaproteobacteria;Enterobacteriales;Enterobacteriaceae;Pectobacterium;Pectobacterium carotovorum;Pectobacterium carotovorum subsp. carotovorum	45	3e-13	ERR006347.sra.10838468	ERR006347	ERX001127	SRS000639	SRP000547	ERA000138	1000 Genomes CEPH (Utah residents with ancestry from Northern and Western Europe) population sequencing	NA12830	NA12830.22	1000G-mpimg-090515-4	CEU	2009-10-06	5770701	113151	WGS	low coverage	no	ILLUMINA	data/NA12830/sequence_read/ERR006347.filt.fastq.gz	MPIMG	PAIRED	Solexa 1G Genome Analyzer	GENOMIC	184
cellular organisms;Eukaryota;Opisthokonta;Metazoa;Eumetazoa;Bilateria;Coelomata;Deuterostomia;Chordata;Craniata;Vertebrata;Gnathostomata;Teleostomi;Euteleostomi;Sarcopterygii;Tetrapoda;Amniota;Mammalia;Theria;Eutheria;Euarchontoglires;Primates;Haplorrhini;Simiiformes;Catarrhini;Hominoidea;Hominidae;Homininae;Homo;Homo sapiens	51	3e-19	1	cellular organisms;Bacteria;Proteobacteria;Gammaproteobacteria;Enterobacteriales;Enterobacteriaceae;Serratia	47	8e-17	ERR006356.sra.146508	ERR006356	ERX001132	SRS000639	SRP000547	ERA000139	1000 Genomes CEPH (Utah residents with ancestry from Northern and Western Europe) population sequencing	NA12830	NA12830.22	1000G-mpimg-090522-5	CEU	2009-10-15	32761380	642380	WGS	low coverage	no	ILLUMINA	data/NA12830/sequence_read/ERR006356.filt.fastq.gz	MPIMG	PAIRED	Solexa 1G Genome Analyzer	GENOMIC	164
cellular organisms;Eukaryota;Opisthokonta;Metazoa;Eumetazoa;Bilateria;Coelomata;Deuterostomia;Chordata;Craniata;Vertebrata;Gnathostomata;Teleostomi;Euteleostomi;Sarcopterygii;Tetrapoda;Amniota;Mammalia;Theria;Eutheria;Euarchontoglires;Primates;Haplorrhini;Simiiformes;Catarrhini;Hominoidea;Hominidae;Homininae;Homo;Homo sapiens	51	3e-19	1	cellular organisms;Bacteria;Proteobacteria;Gammaproteobacteria;Xanthomonadales;Xanthomonadaceae;Stenotrophomonas;Stenotrophomonas maltophilia group;Stenotrophomonas maltophilia;Stenotrophomonas maltophilia D457	47	8e-17	ERR006347.sra.4340375	ERR006347	ERX001127	SRS000639	SRP000547	ERA000138	1000 Genomes CEPH (Utah residents with ancestry from Northern and Western Europe) population sequencing	NA12830	NA12830.22	1000G-mpimg-090515-4	CEU	2009-10-06	5770701	113151	WGS	low coverage	no	ILLUMINA	data/NA12830/sequence_read/ERR006347.filt.fastq.gz	MPIMG	PAIRED	Solexa 1G Genome Analyzer	GENOMIC	184
cellular organisms;Eukaryota;Opisthokonta;Metazoa;Eumetazoa;Bilateria;Coelomata;Deuterostomia;Chordata;Craniata;Vertebrata;Gnathostomata;Teleostomi;Euteleostomi;Sarcopterygii;Tetrapoda;Amniota;Mammalia;Theria;Eutheria;Euarchontoglires;Primates;Haplorrhini;Simiiformes;Catarrhini;Hominoidea;Hominidae;Homininae;Homo;Homo sapiens	51	3e-19	1	cellular organisms;Bacteria;Proteobacteria;Gammaproteobacteria;Pseudomonadales;Pseudomonadaceae;Pseudomonas;Pseudomonas putida group;Pseudomonas putida	50	8e-14	ERR006355.sra.3560719	ERR006355	ERX001132	SRS000639	SRP000547	ERA000139	1000 Genomes CEPH (Utah residents with ancestry from Northern and Western Europe) population sequencing	NA12830	NA12830.22	1000G-mpimg-090522-4	CEU	2009-10-15	66968202	1313102	WGS	low coverage	no	ILLUMINA	data/NA12830/sequence_read/ERR006355.filt.fastq.gz	MPIMG	PAIRED	Solexa 1G Genome Analyzer	GENOMIC	164
cellular organisms;Eukaryota;Opisthokonta;Metazoa;Eumetazoa;Bilateria;Coelomata;Deuterostomia;Chordata;Craniata;Vertebrata;Gnathostomata;Teleostomi;Euteleostomi;Sarcopterygii;Tetrapoda;Amniota;Mammalia;Theria;Eutheria;Euarchontoglires;Primates;Haplorrhini;Simiiformes;Catarrhini;Hominoidea;Hominidae;Homininae;Homo;Homo sapiens	51	3e-19	2	cellular organisms;Bacteria;Proteobacteria;Gammaproteobacteria;Enterobacteriales;Enterobacteriaceae;Serratia;Serratia proteamaculans;Serratia proteamaculans 568	51	2e-14	ERR006354.sra.13681654	ERR006354	ERX001132	SRS000639	SRP000547	ERA000139	1000 Genomes CEPH (Utah residents with ancestry from Northern and Western Europe) population sequencing	NA12830	NA12830.22	1000G-mpimg-090522-3	CEU	2009-10-15	41581728	815328	WGS	low coverage	no	ILLUMINA	data/NA12830/sequence_read/ERR006354.filt.fastq.gz	MPIMG	PAIRED	Solexa 1G Genome Analyzer	GENOMIC	164
cellular organisms;Eukaryota;Opisthokonta;Metazoa;Eumetazoa;Bilateria;Coelomata;Deuterostomia;Chordata;Craniata;Vertebrata;Gnathostomata;Teleostomi;Euteleostomi;Sarcopterygii;Tetrapoda;Amniota;Mammalia;Theria;Eutheria;Euarchontoglires;Primates;Haplorrhini;Simiiformes;Catarrhini;Hominoidea;Hominidae;Homininae;Homo;Homo sapiens	51	3e-19	1	cellular organisms;Bacteria;Proteobacteria;Gammaproteobacteria;Enterobacteriales;Enterobacteriaceae;Serratia;Serratia proteamaculans;Serratia proteamaculans 568	43	5e-12	ERR006347.sra.1661654	ERR006347	ERX001127	SRS000639	SRP000547	ERA000138	1000 Genomes CEPH (Utah residents with ancestry from Northern and Western Europe) population sequencing	NA12830	NA12830.22	1000G-mpimg-090515-4	CEU	2009-10-06	5770701	113151	WGS	low coverage	no	ILLUMINA	data/NA12830/sequence_read/ERR006347.filt.fastq.gz	MPIMG	PAIRED	Solexa 1G Genome Analyzer	GENOMIC	184
cellular organisms;Eukaryota;Opisthokonta;Metazoa;Eumetazoa;Bilateria;Coelomata;Deuterostomia;Chordata;Craniata;Vertebrata;Gnathostomata;Teleostomi;Euteleostomi;Sarcopterygii;Tetrapoda;Amniota;Mammalia;Theria;Eutheria;Euarchontoglires;Primates;Haplorrhini;Simiiformes;Catarrhini;Hominoidea;Hominidae;Homininae;Homo;Homo sapiens	51	3e-19	1	cellular organisms;Bacteria;Proteobacteria;Gammaproteobacteria;Enterobacteriales;Enterobacteriaceae;Citrobacter;Citrobacter rodentium;Citrobacter rodentium ICC168	50	8e-14	ERR006353.sra.3420940	ERR006353	ERX001132	SRS000639	SRP000547	ERA000139	1000 Genomes CEPH (Utah residents with ancestry from Northern and Western Europe) population sequencing	NA12830	NA12830.22	1000G-mpimg-090522-2	CEU	2009-10-15	8527659	167209	WGS	low coverage	no	ILLUMINA	data/NA12830/sequence_read/ERR006353.filt.fastq.gz	MPIMG	PAIRED	Solexa 1G Genome Analyzer	GENOMIC	164
cellular organisms;Eukaryota;Opisthokonta;Metazoa;Eumetazoa;Bilateria;Coelomata;Deuterostomia;Chordata;Craniata;Vertebrata;Gnathostomata;Teleostomi;Euteleostomi;Sarcopterygii;Tetrapoda;Amniota;Mammalia;Theria;Eutheria;Euarchontoglires;Primates;Haplorrhini;Simiiformes;Catarrhini;Hominoidea;Hominidae;Homininae;Homo;Homo sapiens	51	3e-19	2	cellular organisms;Bacteria;Proteobacteria;Gammaproteobacteria;Xanthomonadales;Xanthomonadaceae;Stenotrophomonas;Stenotrophomonas maltophilia group;Stenotrophomonas maltophilia	51	2e-14	ERR006345.sra.3761282	ERR006345	ERX001127	SRS000639	SRP000547	ERA000138	1000 Genomes CEPH (Utah residents with ancestry from Northern and Western Europe) population sequencing	NA12830	NA12830.22	1000G-mpimg-090515-1	CEU	2009-10-06	20819118	408218	WGS	low coverage	no	ILLUMINA	data/NA12830/sequence_read/ERR006345.filt.fastq.gz	MPIMG	PAIRED	Solexa 1G Genome Analyzer	GENOMIC	184
cellular organisms;Eukaryota;Opisthokonta;Metazoa;Eumetazoa;Bilateria;Coelomata;Deuterostomia;Chordata;Craniata;Vertebrata;Gnathostomata;Teleostomi;Euteleostomi;Sarcopterygii;Tetrapoda;Amniota;Mammalia;Theria;Eutheria;Euarchontoglires;Primates;Haplorrhini;Simiiformes;Catarrhini;Hominoidea;Hominidae;Homininae;Homo;Homo sapiens	51	5e-15	1	cellular organisms;Bacteria;Proteobacteria;Gammaproteobacteria;Enterobacteriales;Enterobacteriaceae;Serratia	51	8e-17	ERR006355.sra.2493239	ERR006355	ERX001132	SRS000639	SRP000547	ERA000139	1000 Genomes CEPH (Utah residents with ancestry from Northern and Western Europe) population sequencing	NA12830	NA12830.22	1000G-mpimg-090522-4	CEU	2009-10-15	66968202	1313102	WGS	low coverage	no	ILLUMINA	data/NA12830/sequence_read/ERR006355.filt.fastq.gz	MPIMG	PAIRED	Solexa 1G Genome Analyzer	GENOMIC	164
cellular organisms;Eukaryota;Opisthokonta;Metazoa;Eumetazoa;Bilateria;Coelomata;Deuterostomia;Chordata;Craniata;Vertebrata;Gnathostomata;Teleostomi;Euteleostomi;Sarcopterygii;Tetrapoda;Amniota;Mammalia;Theria;Eutheria;Euarchontoglires;Primates;Haplorrhini;Simiiformes;Catarrhini;Hominoidea;Hominidae;Homininae;Homo;Homo sapiens	51	3e-19	1	cellular organisms;Bacteria;Proteobacteria;Gammaproteobacteria;Enterobacteriales;Enterobacteriaceae;Serratia	51	8e-17	ERR006356.sra.918150	ERR006356	ERX001132	SRS000639	SRP000547	ERA000139	1000 Genomes CEPH (Utah residents with ancestry from Northern and Western Europe) population sequencing	NA12830	NA12830.22	1000G-mpimg-090522-5	CEU	2009-10-15	32761380	642380	WGS	low coverage	no	ILLUMINA	data/NA12830/sequence_read/ERR006356.filt.fastq.gz	MPIMG	PAIRED	Solexa 1G Genome Analyzer	GENOMIC	164
cellular organisms;Eukaryota;Opisthokonta;Metazoa;Eumetazoa;Bilateria;Coelomata;Deuterostomia;Chordata;Craniata;Vertebrata;Gnathostomata;Teleostomi;Euteleostomi;Sarcopterygii;Tetrapoda;Amniota;Mammalia;Theria;Eutheria;Euarchontoglires;Primates;Haplorrhini;Simiiformes;Catarrhini;Hominoidea;Hominidae;Homininae;Homo;Homo sapiens	51	3e-19	2	cellular organisms;Bacteria;Proteobacteria;Gammaproteobacteria;Xanthomonadales;Xanthomonadaceae;Stenotrophomonas;Stenotrophomonas maltophilia group;Stenotrophomonas maltophilia	51	5e-12	ERR006347.sra.10104753	ERR006347	ERX001127	SRS000639	SRP000547	ERA000138	1000 Genomes CEPH (Utah residents with ancestry from Northern and Western Europe) population sequencing	NA12830	NA12830.22	1000G-mpimg-090515-4	CEU	2009-10-06	5770701	113151	WGS	low coverage	no	ILLUMINA	data/NA12830/sequence_read/ERR006347.filt.fastq.gz	MPIMG	PAIRED	Solexa 1G Genome Analyzer	GENOMIC	184
cellular organisms;Eukaryota;Opisthokonta;Metazoa;Eumetazoa;Bilateria;Coelomata;Deuterostomia;Chordata;Craniata;Vertebrata;Gnathostomata;Teleostomi;Euteleostomi;Sarcopterygii;Tetrapoda;Amniota;Mammalia;Theria;Eutheria;Euarchontoglires;Primates;Haplorrhini;Simiiformes;Catarrhini;Hominoidea;Hominidae	36	2e-10	1	cellular organisms;Bacteria;Bacteroidetes/Chlorobi group;Bacteroidetes;Flavobacteriia;Flavobacteriales;Flavobacteriaceae;Flavobacterium;Flavobacterium johnsoniae;Flavobacterium johnsoniae UW101	33	1e-08	ERR001791.sra.5355212	ERR001791	ERX000172	SRS000091	SRP000032	ERA000069	1000Genomes Project Pilot 2	NA12891	g1k-sc-NA12891-CEU-1	IL5_286_2	CEU	2008-12-15	1561248	43368	WGS	high coverage	no	ILLUMINA	data/NA12891/sequence_read/ERR001791.filt.fastq.gz	SC	PAIRED	Solexa 1G Genome Analyzer	GENOMIC	175
cellular organisms;Eukaryota;Opisthokonta;Metazoa;Eumetazoa;Bilateria;Coelomata;Deuterostomia;Chordata;Craniata;Vertebrata;Gnathostomata;Teleostomi;Euteleostomi;Sarcopterygii;Tetrapoda;Amniota;Mammalia;Theria;Eutheria;Euarchontoglires;Primates;Haplorrhini;Simiiformes;Catarrhini;Hominoidea;Hominidae;Homininae;Homo;Homo sapiens	35	1e-07	1	cellular organisms;Bacteria;Actinobacteria;Actinobacteria;Actinobacteridae;Actinomycetales;Corynebacterineae;Mycobacteriaceae;Mycobacterium;Mycobacterium avium complex (MAC);Mycobacterium avium	36	9e-06	ERR006248.sra.7858590	ERR006248	ERX001085	SRS000621	SRP000547	ERA000124	1000 Genomes CEPH (Utah residents with ancestry from Northern and Western Europe) population sequencing	NA12286	NA12286.18	1000G-mpimg-090210-8	CEU	2009-10-06	14753340	409815	WGS	low coverage	no	ILLUMINA	data/NA12286/sequence_read/ERR006248.filt.fastq.gz	MPIMG	PAIRED	Solexa 1G Genome Analyzer	GENOMIC	171
cellular organisms;Eukaryota;Opisthokonta;Metazoa;Eumetazoa;Bilateria;Coelomata;Deuterostomia;Chordata;Craniata;Vertebrata;Gnathostomata;Teleostomi;Euteleostomi;Sarcopterygii;Tetrapoda;Amniota;Mammalia;Theria;Eutheria;Euarchontoglires;Primates;Haplorrhini;Simiiformes;Catarrhini;Hominoidea;Hominidae;Homininae;Homo;Homo sapiens	51	3e-19	2	cellular organisms;Bacteria;Actinobacteria;Actinobacteria;Actinobacteridae;Actinomycetales;Propionibacterineae;Propionibacteriaceae;Propionibacterium;Propionibacterium acnes	51	8e-17	ERR006347.sra.2138052	ERR006347	ERX001127	SRS000639	SRP000547	ERA000138	1000 Genomes CEPH (Utah residents with ancestry from Northern and Western Europe) population sequencing	NA12830	NA12830.22	1000G-mpimg-090515-4	CEU	2009-10-06	5770701	113151	WGS	low coverage	no	ILLUMINA	data/NA12830/sequence_read/ERR006347.filt.fastq.gz	MPIMG	PAIRED	Solexa 1G Genome Analyzer	GENOMIC	184
cellular organisms;Eukaryota;Opisthokonta;Metazoa;Eumetazoa;Bilateria;Coelomata;Deuterostomia;Chordata;Craniata;Vertebrata;Gnathostomata;Teleostomi;Euteleostomi;Sarcopterygii;Tetrapoda;Amniota;Mammalia;Theria;Eutheria;Euarchontoglires;Primates;Haplorrhini;Simiiformes;Catarrhini;Hominoidea;Hominidae;Homininae;Homo;Homo sapiens	51	8e-17	1	cellular organisms;Bacteria;Proteobacteria;Gammaproteobacteria;Enterobacteriales;Enterobacteriaceae;Serratia	49	3e-13	ERR006356.sra.312076	ERR006356	ERX001132	SRS000639	SRP000547	ERA000139	1000 Genomes CEPH (Utah residents with ancestry from Northern and Western Europe) population sequencing	NA12830	NA12830.22	1000G-mpimg-090522-5	CEU	2009-10-15	32761380	642380	WGS	low coverage	no	ILLUMINA	data/NA12830/sequence_read/ERR006356.filt.fastq.gz	MPIMG	PAIRED	Solexa 1G Genome Analyzer	GENOMIC	164
cellular organisms;Eukaryota;Opisthokonta;Metazoa;Eumetazoa;Bilateria;Coelomata;Deuterostomia;Chordata;Craniata;Vertebrata;Gnathostomata;Teleostomi;Euteleostomi;Sarcopterygii;Tetrapoda;Amniota;Mammalia;Theria;Eutheria;Euarchontoglires;Primates;Haplorrhini;Simiiformes;Catarrhini;Hominoidea;Hominidae;Homininae;Homo;Homo sapiens	51	2e-14	1	cellular organisms;Bacteria;Proteobacteria;Gammaproteobacteria;Xanthomonadales;Xanthomonadaceae;Stenotrophomonas;Stenotrophomonas maltophilia group;Stenotrophomonas maltophilia	42	8e-14	ERR006407.sra.2054947	ERR006407	ERX001153	SRS000640	SRP000547	ERA000147	1000 Genomes CEPH (Utah residents with ancestry from Northern and Western Europe) population sequencing	NA12842	NA12842.23	1000G-mpimg-090714-6	CEU	2009-10-07	70949568	1391168	WGS	low coverage	no	ILLUMINA	data/NA12842/sequence_read/ERR006407.filt.fastq.gz	MPIMG	PAIRED	Solexa 1G Genome Analyzer	GENOMIC	178
cellular organisms;Eukaryota;Opisthokonta;Metazoa;Eumetazoa;Bilateria;Coelomata;Deuterostomia;Chordata;Craniata;Vertebrata;Gnathostomata;Teleostomi;Euteleostomi;Sarcopterygii;Tetrapoda;Amniota;Mammalia;Theria;Eutheria;Euarchontoglires;Primates;Haplorrhini;Simiiformes;Catarrhini;Hominoidea;Hominidae;Homininae;Homo;Homo sapiens	51	8e-17	1	cellular organisms;Bacteria;Proteobacteria;Gammaproteobacteria;Enterobacteriales;Enterobacteriaceae;Serratia;Serratia proteamaculans;Serratia proteamaculans 568	51	8e-17	ERR006363.sra.8146921	ERR006363	ERX001136	SRS000633	SRP000547	ERA000140	1000 Genomes CEPH (Utah residents with ancestry from Northern and Western Europe) population sequencing	NA12748	NA12748.19	1000G-mpimg-090602-6	CEU	2009-10-06	4453626	87326	WGS	low coverage	no	ILLUMINA	data/NA12748/sequence_read/ERR006363.filt.fastq.gz	MPIMG	PAIRED	Solexa 1G Genome Analyzer	GENOMIC	173
cellular organisms;Eukaryota;Opisthokonta;Metazoa;Eumetazoa;Bilateria;Coelomata;Deuterostomia;Chordata;Craniata;Vertebrata;Gnathostomata;Teleostomi;Euteleostomi;Sarcopterygii;Tetrapoda;Amniota;Mammalia;Theria;Eutheria;Euarchontoglires;Primates;Haplorrhini;Simiiformes;Catarrhini;Hominoidea;Hominidae;Homininae;Homo;Homo sapiens	51	2e-14	1	cellular organisms;Bacteria;Proteobacteria;Gammaproteobacteria;Enterobacteriales;Enterobacteriaceae;Serratia;Serratia proteamaculans;Serratia proteamaculans 568	51	3e-19	ERR007479.sra.16739300	ERR007479	ERX002149	SRS001261	SRP000547	ERA000162	1000 Genomes CEPH (Utah residents with ancestry from Northern and Western Europe) population sequencing	NA11932	NA11932.13	1000G-mpimg-091009-8	CEU	2009-11-20	189625395	3718145	WGS	low coverage	no	ILLUMINA	data/NA11932/sequence_read/ERR007479.filt.fastq.gz	MPIMG	PAIRED	Solexa 1G Genome Analyzer	GENOMIC	178
cellular organisms;Eukaryota;Opisthokonta;Metazoa;Eumetazoa;Bilateria;Coelomata;Deuterostomia;Chordata;Craniata;Vertebrata;Gnathostomata;Teleostomi;Euteleostomi;Sarcopterygii;Tetrapoda;Amniota;Mammalia;Theria;Eutheria;Euarchontoglires;Primates;Haplorrhini;Simiiformes;Catarrhini;Hominoidea;Hominidae;Homininae;Homo;Homo sapiens	51	3e-19	1	cellular organisms;Bacteria;Proteobacteria;Gammaproteobacteria;Enterobacteriales;Enterobacteriaceae;Serratia	51	2e-14	ERR006347.sra.11175738	ERR006347	ERX001127	SRS000639	SRP000547	ERA000138	1000 Genomes CEPH (Utah residents with ancestry from Northern and Western Europe) population sequencing	NA12830	NA12830.22	1000G-mpimg-090515-4	CEU	2009-10-06	5770701	113151	WGS	low coverage	no	ILLUMINA	data/NA12830/sequence_read/ERR006347.filt.fastq.gz	MPIMG	PAIRED	Solexa 1G Genome Analyzer	GENOMIC	184
cellular organisms;Eukaryota;Opisthokonta;Metazoa;Eumetazoa;Bilateria;Coelomata;Deuterostomia;Chordata;Craniata;Vertebrata;Gnathostomata;Teleostomi;Euteleostomi;Sarcopterygii;Tetrapoda;Amniota;Mammalia;Theria;Eutheria;Euarchontoglires;Primates;Haplorrhini;Simiiformes;Catarrhini;Hominoidea;Hominidae;Homininae;Homo;Homo sapiens	51	3e-19	1	cellular organisms;Bacteria;Proteobacteria;Alphaproteobacteria;Caulobacterales;Caulobacteraceae;Caulobacter;Caulobacter vibrioides;Caulobacter crescentus CB15	50	3e-16	ERR006347.sra.772704	ERR006347	ERX001127	SRS000639	SRP000547	ERA000138	1000 Genomes CEPH (Utah residents with ancestry from Northern and Western Europe) population sequencing	NA12830	NA12830.22	1000G-mpimg-090515-4	CEU	2009-10-06	5770701	113151	WGS	low coverage	no	ILLUMINA	data/NA12830/sequence_read/ERR006347.filt.fastq.gz	MPIMG	PAIRED	Solexa 1G Genome Analyzer	GENOMIC	184
cellular organisms;Eukaryota;Opisthokonta;Metazoa;Eumetazoa;Bilateria;Coelomata;Deuterostomia;Chordata;Craniata;Vertebrata;Gnathostomata;Teleostomi;Euteleostomi;Sarcopterygii;Tetrapoda;Amniota;Mammalia;Theria;Eutheria;Euarchontoglires;Primates;Haplorrhini;Simiiformes;Catarrhini	36	2e-10	1	cellular organisms;Bacteria;Proteobacteria;Betaproteobacteria;Burkholderiales;Burkholderiaceae;Polynucleobacter;Polynucleobacter necessarius	35	1e-07	ERR001848.sra.5321005	ERR001848	ERX000174	SRS000092	SRP000032	ERA000070	1000Genomes Project Pilot 2	NA12892	g1k-sc-NA12892-CEU-1	IL12_283_1	CEU	2008-12-15	4633884	128719	WGS	high coverage	no	ILLUMINA	data/NA12892/sequence_read/ERR001848.filt.fastq.gz	SC	PAIRED	Solexa 1G Genome Analyzer	GENOMIC	175
cellular organisms;Eukaryota;Opisthokonta;Metazoa;Eumetazoa;Bilateria;Coelomata;Deuterostomia;Chordata;Craniata;Vertebrata;Gnathostomata;Teleostomi;Euteleostomi;Sarcopterygii;Tetrapoda;Amniota;Mammalia;Theria;Eutheria;Euarchontoglires;Primates;Haplorrhini;Simiiformes;Catarrhini;Hominoidea;Hominidae;Homininae;Homo;Homo sapiens	51	3e-19	1	cellular organisms;Bacteria;Proteobacteria;Gammaproteobacteria;Enterobacteriales;Enterobacteriaceae;Serratia	51	3e-19	ERR006347.sra.6227413	ERR006347	ERX001127	SRS000639	SRP000547	ERA000138	1000 Genomes CEPH (Utah residents with ancestry from Northern and Western Europe) population sequencing	NA12830	NA12830.22	1000G-mpimg-090515-4	CEU	2009-10-06	5770701	113151	WGS	low coverage	no	ILLUMINA	data/NA12830/sequence_read/ERR006347.filt.fastq.gz	MPIMG	PAIRED	Solexa 1G Genome Analyzer	GENOMIC	184
cellular organisms;Eukaryota;Opisthokonta;Metazoa;Eumetazoa;Bilateria;Coelomata;Deuterostomia;Chordata;Craniata;Vertebrata;Gnathostomata;Teleostomi;Euteleostomi;Sarcopterygii;Tetrapoda;Amniota;Mammalia;Theria;Eutheria;Euarchontoglires;Primates;Haplorrhini;Simiiformes;Catarrhini;Hominoidea;Hominidae;Homininae;Homo;Homo sapiens	51	3e-19	1	cellular organisms;Bacteria;Proteobacteria;Gammaproteobacteria;Xanthomonadales;Xanthomonadaceae;Stenotrophomonas;Stenotrophomonas maltophilia group;Stenotrophomonas maltophilia;Stenotrophomonas maltophilia D457	49	1e-15	ERR006347.sra.9805818	ERR006347	ERX001127	SRS000639	SRP000547	ERA000138	1000 Genomes CEPH (Utah residents with ancestry from Northern and Western Europe) population sequencing	NA12830	NA12830.22	1000G-mpimg-090515-4	CEU	2009-10-06	5770701	113151	WGS	low coverage	no	ILLUMINA	data/NA12830/sequence_read/ERR006347.filt.fastq.gz	MPIMG	PAIRED	Solexa 1G Genome Analyzer	GENOMIC	184
cellular organisms;Eukaryota;Opisthokonta;Metazoa;Eumetazoa;Bilateria;Coelomata;Deuterostomia;Chordata;Craniata;Vertebrata;Gnathostomata;Teleostomi;Euteleostomi;Sarcopterygii;Tetrapoda;Amniota;Mammalia;Theria;Eutheria;Euarchontoglires;Primates;Haplorrhini;Simiiformes;Catarrhini;Hominoidea;Hominidae;Homininae;Homo;Homo sapiens	51	3e-19	1	cellular organisms;Bacteria;Proteobacteria;Betaproteobacteria;Burkholderiales;Comamonadaceae;Acidovorax;Acidovorax sp. JS42	51	8e-17	ERR007638.sra.853569	ERR007638	ERX002216	SRS000619	SRP000547	ERA000173	1000 Genomes CEPH (Utah residents with ancestry from Northern and Western Europe) population sequencing	NA12282	NA12282.16	1000G-mpimg-090512-1	CEU	2009-10-06	6375612	125012	WGS	low coverage	no	ILLUMINA	data/NA12282/sequence_read/ERR007638.filt.fastq.gz	MPIMG	PAIRED	Solexa 1G Genome Analyzer	GENOMIC	170
cellular organisms;Eukaryota;Opisthokonta;Metazoa;Eumetazoa;Bilateria;Coelomata;Deuterostomia;Chordata;Craniata;Vertebrata;Gnathostomata;Teleostomi;Euteleostomi;Sarcopterygii;Tetrapoda;Amniota;Mammalia;Theria;Eutheria;Euarchontoglires;Primates;Haplorrhini;Simiiformes;Catarrhini;Hominoidea;Hominidae;Homininae;Homo;Homo sapiens	48	5e-15	1	cellular organisms;Bacteria;Proteobacteria;Gammaproteobacteria;Xanthomonadales;Xanthomonadaceae;Stenotrophomonas;Stenotrophomonas maltophilia group;Stenotrophomonas maltophilia	51	8e-17	ERR006345.sra.1717054	ERR006345	ERX001127	SRS000639	SRP000547	ERA000138	1000 Genomes CEPH (Utah residents with ancestry from Northern and Western Europe) population sequencing	NA12830	NA12830.22	1000G-mpimg-090515-1	CEU	2009-10-06	20819118	408218	WGS	low coverage	no	ILLUMINA	data/NA12830/sequence_read/ERR006345.filt.fastq.gz	MPIMG	PAIRED	Solexa 1G Genome Analyzer	GENOMIC	184
cellular organisms;Eukaryota;Opisthokonta;Metazoa;Eumetazoa;Bilateria;Coelomata;Deuterostomia;Chordata;Craniata;Vertebrata;Gnathostomata;Teleostomi;Euteleostomi;Sarcopterygii;Tetrapoda;Amniota;Mammalia;Theria;Eutheria;Euarchontoglires;Primates;Haplorrhini;Simiiformes;Catarrhini;Hominoidea;Hominidae;Homininae;Homo;Homo sapiens	51	3e-19	2	cellular organisms;Bacteria;Proteobacteria;Gammaproteobacteria;Xanthomonadales;Xanthomonadaceae;Stenotrophomonas;Stenotrophomonas maltophilia group;Stenotrophomonas maltophilia	49	5e-18	ERR006345.sra.82188	ERR006345	ERX001127	SRS000639	SRP000547	ERA000138	1000 Genomes CEPH (Utah residents with ancestry from Northern and Western Europe) population sequencing	NA12830	NA12830.22	1000G-mpimg-090515-1	CEU	2009-10-06	20819118	408218	WGS	low coverage	no	ILLUMINA	data/NA12830/sequence_read/ERR006345.filt.fastq.gz	MPIMG	PAIRED	Solexa 1G Genome Analyzer	GENOMIC	184
cellular organisms;Eukaryota;Opisthokonta;Metazoa;Eumetazoa;Bilateria;Coelomata;Deuterostomia;Chordata;Craniata;Vertebrata;Gnathostomata;Teleostomi;Euteleostomi;Sarcopterygii;Tetrapoda;Amniota;Mammalia;Theria;Eutheria;Euarchontoglires;Primates;Haplorrhini;Simiiformes;Catarrhini;Hominoidea;Hominidae	51	3e-19	2	cellular organisms;Bacteria;Proteobacteria;Alphaproteobacteria;Sphingomonadales;Sphingomonadaceae;Novosphingobium;Novosphingobium aromaticivorans;Novosphingobium aromaticivorans DSM 12444	51	5e-12	ERR006347.sra.334340	ERR006347	ERX001127	SRS000639	SRP000547	ERA000138	1000 Genomes CEPH (Utah residents with ancestry from Northern and Western Europe) population sequencing	NA12830	NA12830.22	1000G-mpimg-090515-4	CEU	2009-10-06	5770701	113151	WGS	low coverage	no	ILLUMINA	data/NA12830/sequence_read/ERR006347.filt.fastq.gz	MPIMG	PAIRED	Solexa 1G Genome Analyzer	GENOMIC	184
cellular organisms;Eukaryota;Opisthokonta;Metazoa;Eumetazoa;Bilateria;Coelomata;Deuterostomia;Chordata;Craniata;Vertebrata;Gnathostomata;Teleostomi;Euteleostomi;Sarcopterygii;Tetrapoda;Amniota;Mammalia;Theria;Eutheria;Euarchontoglires;Primates;Haplorrhini;Simiiformes;Catarrhini;Hominoidea;Hominidae;Homininae;Homo;Homo sapiens	51	3e-19	1	cellular organisms;Bacteria;Proteobacteria;Gammaproteobacteria;Enterobacteriales;Enterobacteriaceae;Klebsiella;Klebsiella pneumoniae;Klebsiella pneumoniae 342	45	3e-13	ERR006355.sra.7325043	ERR006355	ERX001132	SRS000639	SRP000547	ERA000139	1000 Genomes CEPH (Utah residents with ancestry from Northern and Western Europe) population sequencing	NA12830	NA12830.22	1000G-mpimg-090522-4	CEU	2009-10-15	66968202	1313102	WGS	low coverage	no	ILLUMINA	data/NA12830/sequence_read/ERR006355.filt.fastq.gz	MPIMG	PAIRED	Solexa 1G Genome Analyzer	GENOMIC	164
cellular organisms;Eukaryota;Opisthokonta;Metazoa;Eumetazoa;Bilateria;Coelomata;Deuterostomia;Chordata;Craniata;Vertebrata;Gnathostomata;Teleostomi;Euteleostomi;Sarcopterygii;Tetrapoda;Amniota;Mammalia;Theria;Eutheria;Euarchontoglires;Primates;Haplorrhini;Simiiformes;Catarrhini;Hominoidea;Hominidae;Homininae;Homo;Homo sapiens	36	4e-08	1	cellular organisms;Bacteria;Proteobacteria;Gammaproteobacteria;Aeromonadales;Aeromonadaceae;Aeromonas	32	4e-08	ERR000629.sra.5463986	ERR000629	ERX000122	SRS000040	SRP000031	ERA000024	1000Genomes Project Pilot 1	NA10851	g1k-sc-NA10851-CEU-1	IL16_1138_6	CEU	2008-08-12	672624	18684	WGS	low coverage	no	ILLUMINA	data/NA10851/sequence_read/ERR000629.filt.fastq.gz	SC	PAIRED	Solexa 1G Genome Analyzer	GENOMIC	175
cellular organisms;Eukaryota;Opisthokonta;Metazoa;Eumetazoa;Bilateria;Coelomata;Deuterostomia;Chordata;Craniata;Vertebrata;Gnathostomata;Teleostomi;Euteleostomi;Sarcopterygii;Tetrapoda;Amniota;Mammalia;Theria;Eutheria	51	3e-19	1	cellular organisms;Bacteria;Proteobacteria;Gammaproteobacteria;Xanthomonadales;Xanthomonadaceae;Stenotrophomonas;Stenotrophomonas maltophilia group;Stenotrophomonas maltophilia;Stenotrophomonas maltophilia JV3	51	3e-19	ERR006347.sra.1222430	ERR006347	ERX001127	SRS000639	SRP000547	ERA000138	1000 Genomes CEPH (Utah residents with ancestry from Northern and Western Europe) population sequencing	NA12830	NA12830.22	1000G-mpimg-090515-4	CEU	2009-10-06	5770701	113151	WGS	low coverage	no	ILLUMINA	data/NA12830/sequence_read/ERR006347.filt.fastq.gz	MPIMG	PAIRED	Solexa 1G Genome Analyzer	GENOMIC	184
cellular organisms;Eukaryota;Opisthokonta;Metazoa;Eumetazoa;Bilateria;Coelomata;Deuterostomia;Chordata;Craniata;Vertebrata;Gnathostomata;Teleostomi;Euteleostomi;Sarcopterygii;Tetrapoda;Amniota;Mammalia;Theria;Eutheria;Euarchontoglires;Primates;Haplorrhini;Simiiformes;Catarrhini;Hominoidea;Hominidae;Homininae;Homo;Homo sapiens	35	6e-10	1	cellular organisms;Bacteria;Actinobacteria;Actinobacteria;Actinobacteridae;Actinomycetales	30	6e-07	ERR006284.sra.3474973	ERR006284	ERX001106	SRS000643	SRP000547	ERA000129	1000 Genomes CEPH (Utah residents with ancestry from Northern and Western Europe) population sequencing	NA12890	NA12890.26	1000G-mpimg-090306-4	CEU	2009-10-06	98855748	2745993	WGS	low coverage	no	ILLUMINA	data/NA12890/sequence_read/ERR006284.filt.fastq.gz	MPIMG	PAIRED	Solexa 1G Genome Analyzer	GENOMIC	172
cellular organisms;Eukaryota;Opisthokonta;Metazoa;Eumetazoa;Bilateria;Coelomata;Deuterostomia;Chordata;Craniata;Vertebrata;Gnathostomata;Teleostomi;Euteleostomi;Sarcopterygii;Tetrapoda;Amniota;Mammalia;Theria;Eutheria;Euarchontoglires;Primates;Haplorrhini;Simiiformes;Catarrhini;Hominoidea;Hominidae;Homininae;Homo;Homo sapiens	51	3e-19	1	cellular organisms;Bacteria;Proteobacteria;Gammaproteobacteria;Xanthomonadales;Xanthomonadaceae;Stenotrophomonas;Stenotrophomonas maltophilia group;Stenotrophomonas maltophilia;Stenotrophomonas maltophilia K279a	51	8e-17	ERR006347.sra.6173833	ERR006347	ERX001127	SRS000639	SRP000547	ERA000138	1000 Genomes CEPH (Utah residents with ancestry from Northern and Western Europe) population sequencing	NA12830	NA12830.22	1000G-mpimg-090515-4	CEU	2009-10-06	5770701	113151	WGS	low coverage	no	ILLUMINA	data/NA12830/sequence_read/ERR006347.filt.fastq.gz	MPIMG	PAIRED	Solexa 1G Genome Analyzer	GENOMIC	184
cellular organisms;Eukaryota;Opisthokonta;Metazoa;Eumetazoa;Bilateria;Coelomata;Deuterostomia;Chordata;Craniata;Vertebrata;Gnathostomata;Teleostomi;Euteleostomi;Sarcopterygii;Tetrapoda;Amniota;Mammalia;Theria;Eutheria;Euarchontoglires;Primates;Haplorrhini;Simiiformes;Catarrhini;Hominoidea;Hominidae;Homininae;Homo;Homo sapiens	46	8e-14	2	cellular organisms;Bacteria;Proteobacteria;Gammaproteobacteria;Xanthomonadales;Xanthomonadaceae;Stenotrophomonas;Stenotrophomonas maltophilia group;Stenotrophomonas maltophilia	48	5e-15	ERR006355.sra.12543899	ERR006355	ERX001132	SRS000639	SRP000547	ERA000139	1000 Genomes CEPH (Utah residents with ancestry from Northern and Western Europe) population sequencing	NA12830	NA12830.22	1000G-mpimg-090522-4	CEU	2009-10-15	66968202	1313102	WGS	low coverage	no	ILLUMINA	data/NA12830/sequence_read/ERR006355.filt.fastq.gz	MPIMG	PAIRED	Solexa 1G Genome Analyzer	GENOMIC	164
cellular organisms;Eukaryota;Opisthokonta;Metazoa;Eumetazoa;Bilateria;Coelomata;Deuterostomia;Chordata;Craniata;Vertebrata;Gnathostomata;Teleostomi;Euteleostomi;Sarcopterygii;Tetrapoda;Amniota;Mammalia;Theria;Eutheria;Euarchontoglires;Primates;Haplorrhini;Simiiformes;Catarrhini;Hominoidea;Hominidae;Homininae;Homo;Homo sapiens	51	3e-19	1	cellular organisms;Bacteria;Proteobacteria;Gammaproteobacteria;Xanthomonadales;Xanthomonadaceae;Stenotrophomonas;Stenotrophomonas maltophilia group;Stenotrophomonas maltophilia	47	2e-14	ERR006345.sra.73633	ERR006345	ERX001127	SRS000639	SRP000547	ERA000138	1000 Genomes CEPH (Utah residents with ancestry from Northern and Western Europe) population sequencing	NA12830	NA12830.22	1000G-mpimg-090515-1	CEU	2009-10-06	20819118	408218	WGS	low coverage	no	ILLUMINA	data/NA12830/sequence_read/ERR006345.filt.fastq.gz	MPIMG	PAIRED	Solexa 1G Genome Analyzer	GENOMIC	184
cellular organisms;Eukaryota;Opisthokonta;Metazoa;Eumetazoa;Bilateria;Coelomata;Deuterostomia;Chordata;Craniata;Vertebrata;Gnathostomata;Teleostomi;Euteleostomi;Sarcopterygii;Tetrapoda;Amniota;Mammalia;Theria;Eutheria;Euarchontoglires;Primates;Haplorrhini;Simiiformes;Catarrhini;Hominoidea;Hominidae;Homininae;Homo;Homo sapiens	29	4e-06	1	cellular organisms;Bacteria;Proteobacteria;Gammaproteobacteria;Enterobacteriales;Enterobacteriaceae;Cronobacter;Cronobacter sakazakii;Cronobacter sakazakii ES15	47	8e-17	ERR006347.sra.8402043	ERR006347	ERX001127	SRS000639	SRP000547	ERA000138	1000 Genomes CEPH (Utah residents with ancestry from Northern and Western Europe) population sequencing	NA12830	NA12830.22	1000G-mpimg-090515-4	CEU	2009-10-06	5770701	113151	WGS	low coverage	no	ILLUMINA	data/NA12830/sequence_read/ERR006347.filt.fastq.gz	MPIMG	PAIRED	Solexa 1G Genome Analyzer	GENOMIC	184
cellular organisms;Eukaryota;Opisthokonta;Metazoa;Eumetazoa;Bilateria;Coelomata;Deuterostomia;Chordata;Craniata;Vertebrata;Gnathostomata;Teleostomi;Euteleostomi;Sarcopterygii;Tetrapoda;Amniota;Mammalia;Theria;Eutheria;Euarchontoglires;Primates;Haplorrhini;Simiiformes;Catarrhini;Hominoidea;Hominidae;Homininae;Homo;Homo sapiens	51	3e-19	1	cellular organisms;Bacteria;Proteobacteria;Gammaproteobacteria;Enterobacteriales;Enterobacteriaceae;Edwardsiella;Edwardsiella tarda	49	1e-15	ERR006347.sra.9154160	ERR006347	ERX001127	SRS000639	SRP000547	ERA000138	1000 Genomes CEPH (Utah residents with ancestry from Northern and Western Europe) population sequencing	NA12830	NA12830.22	1000G-mpimg-090515-4	CEU	2009-10-06	5770701	113151	WGS	low coverage	no	ILLUMINA	data/NA12830/sequence_read/ERR006347.filt.fastq.gz	MPIMG	PAIRED	Solexa 1G Genome Analyzer	GENOMIC	184
cellular organisms;Eukaryota;Opisthokonta;Metazoa;Eumetazoa;Bilateria;Coelomata;Deuterostomia;Chordata;Craniata;Vertebrata;Gnathostomata;Teleostomi;Euteleostomi;Sarcopterygii;Tetrapoda;Amniota;Mammalia;Theria;Eutheria;Euarchontoglires;Primates;Haplorrhini;Simiiformes;Catarrhini;Hominoidea;Hominidae;Homininae;Homo;Homo sapiens	50	1e-18	4	cellular organisms;Bacteria;Proteobacteria;Gammaproteobacteria;Xanthomonadales;Xanthomonadaceae;Stenotrophomonas;Stenotrophomonas maltophilia group;Stenotrophomonas maltophilia	48	5e-15	ERR006347.sra.8845996	ERR006347	ERX001127	SRS000639	SRP000547	ERA000138	1000 Genomes CEPH (Utah residents with ancestry from Northern and Western Europe) population sequencing	NA12830	NA12830.22	1000G-mpimg-090515-4	CEU	2009-10-06	5770701	113151	WGS	low coverage	no	ILLUMINA	data/NA12830/sequence_read/ERR006347.filt.fastq.gz	MPIMG	PAIRED	Solexa 1G Genome Analyzer	GENOMIC	184
cellular organisms;Eukaryota;Opisthokonta;Metazoa;Eumetazoa;Bilateria;Coelomata;Deuterostomia;Chordata;Craniata;Vertebrata;Gnathostomata;Teleostomi;Euteleostomi;Sarcopterygii;Tetrapoda;Amniota;Mammalia;Theria;Eutheria;Euarchontoglires;Primates;Haplorrhini;Simiiformes;Catarrhini;Hominoidea;Hominidae;Homininae;Homo;Homo sapiens	37	4e-11	1	cellular organisms;Bacteria;Actinobacteria;Actinobacteria;Actinobacteridae;Actinomycetales;Propionibacterineae;Propionibacteriaceae;Propionibacterium;Propionibacterium acnes	36	2e-10	ERR001044.sra.5058508	ERR001044	ERX000071	SRS000067	SRP000031	ERA000024	1000Genomes Project Pilot 1	NA12234	g1k-sc-NA12234-CEU-1	IL25_980_7	CEU	2008-08-12	649794	17562	WGS	low coverage	no	ILLUMINA	data/NA12234/sequence_read/ERR001044.filt.fastq.gz	SC	PAIRED	Solexa 1G Genome Analyzer	GENOMIC	175
cellular organisms;Eukaryota;Opisthokonta;Metazoa;Eumetazoa;Bilateria;Coelomata;Deuterostomia;Chordata;Craniata;Vertebrata;Gnathostomata;Teleostomi;Euteleostomi;Sarcopterygii;Tetrapoda;Amniota;Mammalia;Theria;Eutheria;Euarchontoglires;Primates;Haplorrhini;Simiiformes;Catarrhini;Hominoidea;Hominidae;Homininae;Homo;Homo sapiens	36	2e-10	1	cellular organisms;Bacteria;Proteobacteria;Gammaproteobacteria;Xanthomonadales;Xanthomonadaceae;Stenotrophomonas;Stenotrophomonas maltophilia group;Stenotrophomonas maltophilia;Stenotrophomonas maltophilia K279a	32	9e-06	ERR006229.sra.5260455	ERR006229	ERX001075	SRS000621	SRP000547	ERA000122	1000 Genomes CEPH (Utah residents with ancestry from Northern and Western Europe) population sequencing	NA12286	NA12286.18	1000G-mpimg-090121-5	CEU	2009-10-06	140406912	3900192	WGS	low coverage	no	ILLUMINA	data/NA12286/sequence_read/ERR006229.filt.fastq.gz	MPIMG	PAIRED	Solexa 1G Genome Analyzer	GENOMIC	201
cellular organisms;Eukaryota;Opisthokonta;Metazoa;Eumetazoa;Bilateria;Coelomata;Deuterostomia;Chordata;Craniata;Vertebrata;Gnathostomata;Teleostomi;Euteleostomi;Sarcopterygii;Tetrapoda;Amniota;Mammalia;Theria;Eutheria;Euarchontoglires;Primates;Haplorrhini;Simiiformes;Catarrhini;Hominoidea;Hominidae;Homininae;Homo;Homo sapiens	51	3e-19	2	cellular organisms;Bacteria;Proteobacteria;Gammaproteobacteria;Xanthomonadales;Xanthomonadaceae;Stenotrophomonas;Stenotrophomonas maltophilia group;Stenotrophomonas maltophilia	51	3e-19	ERR006347.sra.392213	ERR006347	ERX001127	SRS000639	SRP000547	ERA000138	1000 Genomes CEPH (Utah residents with ancestry from Northern and Western Europe) population sequencing	NA12830	NA12830.22	1000G-mpimg-090515-4	CEU	2009-10-06	5770701	113151	WGS	low coverage	no	ILLUMINA	data/NA12830/sequence_read/ERR006347.filt.fastq.gz	MPIMG	PAIRED	Solexa 1G Genome Analyzer	GENOMIC	184
cellular organisms;Eukaryota;Opisthokonta;Metazoa;Eumetazoa;Bilateria;Coelomata;Deuterostomia;Chordata;Craniata;Vertebrata;Gnathostomata;Teleostomi;Euteleostomi;Sarcopterygii;Tetrapoda;Amniota;Mammalia;Theria;Eutheria;Euarchontoglires;Primates;Haplorrhini;Simiiformes;Catarrhini;Hominoidea;Hominidae;Homininae;Homo;Homo sapiens	51	3e-19	1	cellular organisms;Bacteria;Proteobacteria;Gammaproteobacteria;Enterobacteriales;Enterobacteriaceae;Serratia	51	3e-19	ERR006366.sra.8195083	ERR006366	ERX001138	SRS000639	SRP000547	ERA000141	1000 Genomes CEPH (Utah residents with ancestry from Northern and Western Europe) population sequencing	NA12830	NA12830.22	1000G-mpimg-090608-1	CEU	2009-10-06	58676877	1150527	WGS	low coverage	no	ILLUMINA	data/NA12830/sequence_read/ERR006366.filt.fastq.gz	MPIMG	PAIRED	Solexa 1G Genome Analyzer	GENOMIC	145
cellular organisms;Eukaryota;Opisthokonta;Metazoa;Eumetazoa;Bilateria;Coelomata;Deuterostomia;Chordata;Craniata;Vertebrata;Gnathostomata;Teleostomi;Euteleostomi;Sarcopterygii;Tetrapoda;Amniota;Mammalia;Theria;Eutheria;Euarchontoglires;Primates;Haplorrhini;Simiiformes;Catarrhini;Hominoidea;Hominidae;Homininae;Homo;Homo sapiens	51	1e-06	2	cellular organisms;Bacteria;Proteobacteria;Gammaproteobacteria;Xanthomonadales;Xanthomonadaceae;Stenotrophomonas;Stenotrophomonas maltophilia group;Stenotrophomonas maltophilia;Stenotrophomonas maltophilia K279a	51	2e-14	ERR006355.sra.7203514	ERR006355	ERX001132	SRS000639	SRP000547	ERA000139	1000 Genomes CEPH (Utah residents with ancestry from Northern and Western Europe) population sequencing	NA12830	NA12830.22	1000G-mpimg-090522-4	CEU	2009-10-15	66968202	1313102	WGS	low coverage	no	ILLUMINA	data/NA12830/sequence_read/ERR006355.filt.fastq.gz	MPIMG	PAIRED	Solexa 1G Genome Analyzer	GENOMIC	164
cellular organisms;Eukaryota;Opisthokonta;Metazoa;Eumetazoa;Bilateria;Coelomata;Deuterostomia;Chordata;Craniata;Vertebrata;Gnathostomata;Teleostomi;Euteleostomi;Sarcopterygii;Tetrapoda;Amniota;Mammalia;Theria;Eutheria;Euarchontoglires;Primates;Haplorrhini;Simiiformes;Catarrhini;Hominoidea;Hominidae;Homininae;Homo;Homo sapiens	51	8e-17	1	cellular organisms;Bacteria;Proteobacteria;Gammaproteobacteria;Xanthomonadales;Xanthomonadaceae;Stenotrophomonas;Stenotrophomonas maltophilia group;Stenotrophomonas maltophilia	51	5e-12	ERR006347.sra.10290597	ERR006347	ERX001127	SRS000639	SRP000547	ERA000138	1000 Genomes CEPH (Utah residents with ancestry from Northern and Western Europe) population sequencing	NA12830	NA12830.22	1000G-mpimg-090515-4	CEU	2009-10-06	5770701	113151	WGS	low coverage	no	ILLUMINA	data/NA12830/sequence_read/ERR006347.filt.fastq.gz	MPIMG	PAIRED	Solexa 1G Genome Analyzer	GENOMIC	184
cellular organisms;Eukaryota;Opisthokonta;Metazoa;Eumetazoa;Bilateria;Coelomata;Deuterostomia;Chordata;Craniata;Vertebrata;Gnathostomata;Teleostomi;Euteleostomi;Sarcopterygii;Tetrapoda;Amniota;Mammalia;Theria;Eutheria;Euarchontoglires;Primates;Haplorrhini;Simiiformes;Catarrhini;Hominoidea;Hominidae;Homininae;Homo;Homo sapiens	51	8e-17	2	cellular organisms;Bacteria;Proteobacteria;Gammaproteobacteria;Xanthomonadales;Xanthomonadaceae;Stenotrophomonas;Stenotrophomonas maltophilia group;Stenotrophomonas maltophilia	51	8e-17	ERR006347.sra.9016826	ERR006347	ERX001127	SRS000639	SRP000547	ERA000138	1000 Genomes CEPH (Utah residents with ancestry from Northern and Western Europe) population sequencing	NA12830	NA12830.22	1000G-mpimg-090515-4	CEU	2009-10-06	5770701	113151	WGS	low coverage	no	ILLUMINA	data/NA12830/sequence_read/ERR006347.filt.fastq.gz	MPIMG	PAIRED	Solexa 1G Genome Analyzer	GENOMIC	184
cellular organisms;Eukaryota;Opisthokonta;Metazoa;Eumetazoa;Bilateria;Coelomata;Deuterostomia;Chordata;Craniata;Vertebrata;Gnathostomata;Teleostomi;Euteleostomi;Sarcopterygii;Tetrapoda;Amniota;Mammalia;Theria;Eutheria;Euarchontoglires;Primates;Haplorrhini;Simiiformes;Catarrhini;Hominoidea;Hominidae;Homininae;Homo;Homo sapiens	48	2e-17	1	cellular organisms;Bacteria;Proteobacteria;Gammaproteobacteria;Enterobacteriales;Enterobacteriaceae	44	1e-12	ERR006347.sra.11921514	ERR006347	ERX001127	SRS000639	SRP000547	ERA000138	1000 Genomes CEPH (Utah residents with ancestry from Northern and Western Europe) population sequencing	NA12830	NA12830.22	1000G-mpimg-090515-4	CEU	2009-10-06	5770701	113151	WGS	low coverage	no	ILLUMINA	data/NA12830/sequence_read/ERR006347.filt.fastq.gz	MPIMG	PAIRED	Solexa 1G Genome Analyzer	GENOMIC	184
cellular organisms;Eukaryota;Opisthokonta;Metazoa;Eumetazoa;Bilateria;Coelomata;Deuterostomia;Chordata;Craniata;Vertebrata;Gnathostomata;Teleostomi;Euteleostomi;Sarcopterygii;Tetrapoda;Amniota;Mammalia;Theria;Eutheria;Euarchontoglires;Primates;Haplorrhini;Simiiformes;Catarrhini;Hominoidea;Hominidae;Homininae	51	3e-19	1	cellular organisms;Bacteria;Proteobacteria;Gammaproteobacteria;Xanthomonadales;Xanthomonadaceae;Stenotrophomonas;Stenotrophomonas maltophilia group;Stenotrophomonas maltophilia;Stenotrophomonas maltophilia K279a	49	3e-13	ERR006355.sra.6775584	ERR006355	ERX001132	SRS000639	SRP000547	ERA000139	1000 Genomes CEPH (Utah residents with ancestry from Northern and Western Europe) population sequencing	NA12830	NA12830.22	1000G-mpimg-090522-4	CEU	2009-10-15	66968202	1313102	WGS	low coverage	no	ILLUMINA	data/NA12830/sequence_read/ERR006355.filt.fastq.gz	MPIMG	PAIRED	Solexa 1G Genome Analyzer	GENOMIC	164
cellular organisms;Eukaryota;Opisthokonta;Metazoa;Eumetazoa;Bilateria;Coelomata;Deuterostomia;Chordata;Craniata;Vertebrata;Gnathostomata;Teleostomi;Euteleostomi;Sarcopterygii;Tetrapoda;Amniota;Mammalia;Theria;Eutheria;Euarchontoglires;Primates;Haplorrhini;Simiiformes;Catarrhini;Hominoidea;Hominidae;Homininae;Homo;Homo sapiens	51	3e-19	2	cellular organisms;Bacteria;Proteobacteria;Gammaproteobacteria;Xanthomonadales;Xanthomonadaceae;Stenotrophomonas;Stenotrophomonas maltophilia group;Stenotrophomonas maltophilia	51	3e-19	ERR006347.sra.5790642	ERR006347	ERX001127	SRS000639	SRP000547	ERA000138	1000 Genomes CEPH (Utah residents with ancestry from Northern and Western Europe) population sequencing	NA12830	NA12830.22	1000G-mpimg-090515-4	CEU	2009-10-06	5770701	113151	WGS	low coverage	no	ILLUMINA	data/NA12830/sequence_read/ERR006347.filt.fastq.gz	MPIMG	PAIRED	Solexa 1G Genome Analyzer	GENOMIC	184
cellular organisms;Eukaryota;Opisthokonta;Metazoa;Eumetazoa;Bilateria;Coelomata;Deuterostomia;Chordata;Craniata;Vertebrata;Gnathostomata;Teleostomi;Euteleostomi;Sarcopterygii;Tetrapoda;Amniota;Mammalia;Theria;Eutheria;Euarchontoglires;Primates;Haplorrhini;Simiiformes;Catarrhini;Hominoidea;Hominidae;Homininae;Homo;Homo sapiens	51	3e-19	1	cellular organisms;Bacteria;Proteobacteria;Gammaproteobacteria;Xanthomonadales;Xanthomonadaceae;Stenotrophomonas;Stenotrophomonas maltophilia group;Stenotrophomonas maltophilia	49	1e-15	ERR006347.sra.2624828	ERR006347	ERX001127	SRS000639	SRP000547	ERA000138	1000 Genomes CEPH (Utah residents with ancestry from Northern and Western Europe) population sequencing	NA12830	NA12830.22	1000G-mpimg-090515-4	CEU	2009-10-06	5770701	113151	WGS	low coverage	no	ILLUMINA	data/NA12830/sequence_read/ERR006347.filt.fastq.gz	MPIMG	PAIRED	Solexa 1G Genome Analyzer	GENOMIC	184
cellular organisms;Eukaryota;Opisthokonta;Metazoa;Eumetazoa;Bilateria;Coelomata;Deuterostomia;Chordata;Craniata;Vertebrata;Gnathostomata;Teleostomi;Euteleostomi;Sarcopterygii;Tetrapoda;Amniota;Mammalia;Theria;Eutheria;Euarchontoglires;Primates;Haplorrhini;Simiiformes;Catarrhini;Hominoidea;Hominidae;Homininae;Homo;Homo sapiens	51	8e-17	1	cellular organisms;Bacteria;Proteobacteria;Gammaproteobacteria;Xanthomonadales;Xanthomonadaceae;Stenotrophomonas;Stenotrophomonas maltophilia group;Stenotrophomonas maltophilia;Stenotrophomonas maltophilia JV3	50	8e-14	ERR006355.sra.12315030	ERR006355	ERX001132	SRS000639	SRP000547	ERA000139	1000 Genomes CEPH (Utah residents with ancestry from Northern and Western Europe) population sequencing	NA12830	NA12830.22	1000G-mpimg-090522-4	CEU	2009-10-15	66968202	1313102	WGS	low coverage	no	ILLUMINA	data/NA12830/sequence_read/ERR006355.filt.fastq.gz	MPIMG	PAIRED	Solexa 1G Genome Analyzer	GENOMIC	164
cellular organisms;Eukaryota;Opisthokonta;Metazoa;Eumetazoa;Bilateria;Coelomata;Deuterostomia;Chordata;Craniata;Vertebrata;Gnathostomata;Teleostomi;Euteleostomi;Sarcopterygii;Tetrapoda;Amniota;Mammalia;Theria;Eutheria;Euarchontoglires;Primates;Haplorrhini;Simiiformes;Catarrhini	51	3e-19	1	cellular organisms;Bacteria;Proteobacteria;Gammaproteobacteria;Enterobacteriales;Enterobacteriaceae	51	3e-19	ERR006354.sra.12282115	ERR006354	ERX001132	SRS000639	SRP000547	ERA000139	1000 Genomes CEPH (Utah residents with ancestry from Northern and Western Europe) population sequencing	NA12830	NA12830.22	1000G-mpimg-090522-3	CEU	2009-10-15	41581728	815328	WGS	low coverage	no	ILLUMINA	data/NA12830/sequence_read/ERR006354.filt.fastq.gz	MPIMG	PAIRED	Solexa 1G Genome Analyzer	GENOMIC	164
cellular organisms;Eukaryota;Opisthokonta;Metazoa;Eumetazoa;Bilateria;Coelomata;Deuterostomia;Chordata;Craniata;Vertebrata;Gnathostomata;Teleostomi;Euteleostomi;Sarcopterygii;Tetrapoda;Amniota;Mammalia;Theria;Eutheria;Euarchontoglires;Primates;Haplorrhini;Simiiformes;Catarrhini;Hominoidea;Hominidae;Homininae;Homo;Homo sapiens	51	2e-14	4	cellular organisms;Bacteria;Proteobacteria;Gammaproteobacteria;Xanthomonadales;Xanthomonadaceae;Stenotrophomonas;Stenotrophomonas maltophilia group;Stenotrophomonas maltophilia;Stenotrophomonas maltophilia K279a	49	1e-15	ERR006345.sra.2175461	ERR006345	ERX001127	SRS000639	SRP000547	ERA000138	1000 Genomes CEPH (Utah residents with ancestry from Northern and Western Europe) population sequencing	NA12830	NA12830.22	1000G-mpimg-090515-1	CEU	2009-10-06	20819118	408218	WGS	low coverage	no	ILLUMINA	data/NA12830/sequence_read/ERR006345.filt.fastq.gz	MPIMG	PAIRED	Solexa 1G Genome Analyzer	GENOMIC	184
cellular organisms;Eukaryota;Opisthokonta;Metazoa;Eumetazoa;Bilateria;Coelomata;Deuterostomia;Chordata;Craniata;Vertebrata;Gnathostomata;Teleostomi;Euteleostomi;Sarcopterygii;Tetrapoda;Amniota;Mammalia;Theria;Eutheria;Euarchontoglires;Primates;Haplorrhini;Simiiformes;Catarrhini;Hominoidea;Hominidae;Homininae;Homo;Homo sapiens	36	2e-10	1	cellular organisms;Bacteria;Actinobacteria;Actinobacteria;Actinobacteridae;Actinomycetales;Propionibacterineae;Propionibacteriaceae;Propionibacterium;Propionibacterium acnes	35	6e-10	ERR000971.sra.1970262	ERR000971	ERX000071	SRS000067	SRP000031	ERA000024	1000Genomes Project Pilot 1	NA12234	g1k-sc-NA12234-CEU-1	IL13_981_8	CEU	2008-08-12	1717884	47719	WGS	low coverage	no	ILLUMINA	data/NA12234/sequence_read/ERR000971.filt.fastq.gz	SC	PAIRED	Solexa 1G Genome Analyzer	GENOMIC	175
cellular organisms;Eukaryota;Opisthokonta;Metazoa;Eumetazoa;Bilateria;Coelomata;Deuterostomia;Chordata;Craniata;Vertebrata;Gnathostomata;Teleostomi;Euteleostomi;Sarcopterygii;Tetrapoda;Amniota;Mammalia;Theria;Eutheria;Euarchontoglires;Primates;Haplorrhini;Simiiformes;Catarrhini;Hominoidea;Hominidae;Homininae;Homo;Homo sapiens	51	2e-14	1	cellular organisms;Bacteria;Proteobacteria;Gammaproteobacteria;Enterobacteriales;Enterobacteriaceae;Serratia;Serratia proteamaculans;Serratia proteamaculans 568	46	8e-14	ERR006355.sra.5772612	ERR006355	ERX001132	SRS000639	SRP000547	ERA000139	1000 Genomes CEPH (Utah residents with ancestry from Northern and Western Europe) population sequencing	NA12830	NA12830.22	1000G-mpimg-090522-4	CEU	2009-10-15	66968202	1313102	WGS	low coverage	no	ILLUMINA	data/NA12830/sequence_read/ERR006355.filt.fastq.gz	MPIMG	PAIRED	Solexa 1G Genome Analyzer	GENOMIC	164
cellular organisms;Eukaryota;Opisthokonta;Metazoa;Eumetazoa;Bilateria;Coelomata;Deuterostomia;Chordata;Craniata;Vertebrata;Gnathostomata;Teleostomi;Euteleostomi;Sarcopterygii;Tetrapoda;Amniota;Mammalia;Theria;Eutheria;Euarchontoglires;Primates;Haplorrhini;Simiiformes;Catarrhini;Hominoidea;Hominidae;Homininae;Homo;Homo sapiens	51	8e-17	1	cellular organisms;Bacteria;Actinobacteria;Actinobacteria;Actinobacteridae;Actinomycetales;Propionibacterineae;Propionibacteriaceae;Propionibacterium;Propionibacterium acnes;Propionibacterium acnes ATCC 11828	51	3e-19	ERR006390.sra.812991	ERR006390	ERX001146	SRS000640	SRP000547	ERA000144	1000 Genomes CEPH (Utah residents with ancestry from Northern and Western Europe) population sequencing	NA12842	NA12842.23	1000G-mpimg-090625-8	CEU	2009-10-06	100035786	1961486	WGS	low coverage	no	ILLUMINA	data/NA12842/sequence_read/ERR006390.filt.fastq.gz	MPIMG	PAIRED	Solexa 1G Genome Analyzer	GENOMIC	171
cellular organisms;Eukaryota;Opisthokonta;Metazoa;Eumetazoa;Bilateria;Coelomata;Deuterostomia;Chordata;Craniata;Vertebrata;Gnathostomata;Teleostomi;Euteleostomi;Sarcopterygii;Tetrapoda;Amniota;Mammalia;Theria;Eutheria;Euarchontoglires;Primates;Haplorrhini;Simiiformes;Catarrhini;Hominoidea;Hominidae;Homininae;Homo;Homo sapiens	37	4e-11	1	cellular organisms;Bacteria;Proteobacteria;Gammaproteobacteria	37	4e-11	ERR000931.sra.3815839	ERR000931	ERX000069	SRS000060	SRP000031	ERA000024	1000Genomes Project Pilot 1	NA12043	g1k-sc-NA12043-CEU-1	IL14_972_8	CEU	2008-08-12	2135307	57711	WGS	low coverage	no	ILLUMINA	data/NA12043/sequence_read/ERR000931.filt.fastq.gz	SC	PAIRED	Solexa 1G Genome Analyzer	GENOMIC	175
cellular organisms;Eukaryota;Opisthokonta;Metazoa;Eumetazoa;Bilateria;Coelomata;Deuterostomia;Chordata;Craniata;Vertebrata;Gnathostomata;Teleostomi;Euteleostomi;Sarcopterygii;Tetrapoda;Amniota;Mammalia;Theria;Eutheria;Euarchontoglires;Primates;Haplorrhini;Simiiformes;Catarrhini;Hominoidea;Hominidae;Homininae;Homo;Homo sapiens	36	2e-10	1	cellular organisms;Bacteria;Actinobacteria;Actinobacteria;Actinobacteridae;Actinomycetales;Propionibacterineae;Propionibacteriaceae;Propionibacterium;Propionibacterium acnes;Propionibacterium acnes SK137	36	2e-10	ERR006307.sra.5305431	ERR006307	ERX001114	SRS000643	SRP000547	ERA000132	1000 Genomes CEPH (Utah residents with ancestry from Northern and Western Europe) population sequencing	NA12890	NA12890.26	1000G-mpimg-090320-3	CEU	2009-10-06	49792644	1383129	WGS	low coverage	no	ILLUMINA	data/NA12890/sequence_read/ERR006307.filt.fastq.gz	MPIMG	PAIRED	Solexa 1G Genome Analyzer	GENOMIC	179
cellular organisms;Eukaryota;Opisthokonta;Metazoa;Eumetazoa;Bilateria;Coelomata;Deuterostomia;Chordata;Craniata;Vertebrata;Gnathostomata;Teleostomi;Euteleostomi;Sarcopterygii;Tetrapoda;Amniota;Mammalia;Theria;Eutheria;Euarchontoglires;Primates;Haplorrhini;Simiiformes;Catarrhini;Hominoidea;Hominidae;Homininae;Homo;Homo sapiens	51	3e-19	3	cellular organisms;Bacteria;Proteobacteria;Betaproteobacteria;Burkholderiales;Burkholderiaceae;Burkholderia;Burkholderia cepacia complex;Burkholderia multivorans;Burkholderia multivorans ATCC 17616	51	8e-17	ERR006354.sra.15084429	ERR006354	ERX001132	SRS000639	SRP000547	ERA000139	1000 Genomes CEPH (Utah residents with ancestry from Northern and Western Europe) population sequencing	NA12830	NA12830.22	1000G-mpimg-090522-3	CEU	2009-10-15	41581728	815328	WGS	low coverage	no	ILLUMINA	data/NA12830/sequence_read/ERR006354.filt.fastq.gz	MPIMG	PAIRED	Solexa 1G Genome Analyzer	GENOMIC	164
cellular organisms;Eukaryota;Opisthokonta;Metazoa;Eumetazoa;Bilateria;Coelomata;Deuterostomia;Chordata;Craniata;Vertebrata;Gnathostomata;Teleostomi;Euteleostomi;Sarcopterygii;Tetrapoda;Amniota;Mammalia;Theria;Eutheria;Euarchontoglires;Primates;Haplorrhini;Simiiformes;Catarrhini;Hominoidea;Hominidae;Homininae;Homo;Homo sapiens	36	2e-10	1	cellular organisms;Bacteria;Actinobacteria;Actinobacteria;Actinobacteridae;Actinomycetales;Propionibacterineae;Propionibacteriaceae;Propionibacterium;Propionibacterium acnes	35	6e-10	ERR000875.sra.1842406	ERR000875	ERX000132	SRS000047	SRP000031	ERA000024	1000Genomes Project Pilot 1	NA11894	g1k-sc-NA11894-CEU-1	IL22_823_3	CEU	2008-08-12	432828	12023	WGS	low coverage	no	ILLUMINA	data/NA11894/sequence_read/ERR000875.filt.fastq.gz	SC	PAIRED	Solexa 1G Genome Analyzer	GENOMIC	175
cellular organisms;Eukaryota;Opisthokonta;Metazoa;Eumetazoa;Bilateria;Coelomata;Deuterostomia;Chordata;Craniata;Vertebrata;Gnathostomata;Teleostomi;Euteleostomi;Sarcopterygii;Tetrapoda;Amniota;Mammalia;Theria;Eutheria;Euarchontoglires;Primates;Haplorrhini;Simiiformes;Catarrhini;Hominoidea;Hominidae;Homininae;Homo;Homo sapiens	32	4e-08	1	cellular organisms;Bacteria;Proteobacteria;delta/epsilon subdivisions;Deltaproteobacteria;Desulfuromonadales;Pelobacteraceae;Pelobacter;Pelobacter propionicus;Pelobacter propionicus DSM 2379	36	9e-06	ERR006251.sra.4001762	ERR006251	ERX001087	SRS000641	SRP000547	ERA000125	1000 Genomes CEPH (Utah residents with ancestry from Northern and Western Europe) population sequencing	NA12843	NA12843.24	1000G-mpimg-090219-3	CEU	2009-10-06	19305756	536271	WGS	low coverage	no	ILLUMINA	data/NA12843/sequence_read/ERR006251.filt.fastq.gz	MPIMG	PAIRED	Solexa 1G Genome Analyzer	GENOMIC	158
cellular organisms;Eukaryota;Opisthokonta;Metazoa;Eumetazoa;Bilateria;Coelomata;Deuterostomia;Chordata;Craniata;Vertebrata;Gnathostomata;Teleostomi;Euteleostomi;Sarcopterygii;Tetrapoda;Amniota;Mammalia;Theria;Eutheria;Euarchontoglires;Primates;Haplorrhini;Simiiformes;Catarrhini;Hominoidea;Hominidae;Homininae;Homo;Homo sapiens	50	8e-14	1	cellular organisms;Bacteria;Proteobacteria;Gammaproteobacteria;Xanthomonadales;Xanthomonadaceae;Stenotrophomonas;Stenotrophomonas maltophilia group;Stenotrophomonas maltophilia;Stenotrophomonas maltophilia D457	49	1e-15	ERR006355.sra.6744937	ERR006355	ERX001132	SRS000639	SRP000547	ERA000139	1000 Genomes CEPH (Utah residents with ancestry from Northern and Western Europe) population sequencing	NA12830	NA12830.22	1000G-mpimg-090522-4	CEU	2009-10-15	66968202	1313102	WGS	low coverage	no	ILLUMINA	data/NA12830/sequence_read/ERR006355.filt.fastq.gz	MPIMG	PAIRED	Solexa 1G Genome Analyzer	GENOMIC	164
cellular organisms;Eukaryota;Opisthokonta;Metazoa;Eumetazoa;Bilateria;Coelomata;Deuterostomia;Chordata;Craniata;Vertebrata;Gnathostomata;Teleostomi;Euteleostomi;Sarcopterygii;Tetrapoda;Amniota;Mammalia;Theria;Eutheria;Euarchontoglires;Primates;Haplorrhini;Simiiformes;Catarrhini;Hominoidea;Hominidae;Homininae;Homo;Homo sapiens	51	3e-19	1	cellular organisms;Bacteria;Proteobacteria;Gammaproteobacteria;Enterobacteriales;Enterobacteriaceae;Serratia;Serratia proteamaculans;Serratia proteamaculans 568	51	8e-17	ERR006356.sra.2170335	ERR006356	ERX001132	SRS000639	SRP000547	ERA000139	1000 Genomes CEPH (Utah residents with ancestry from Northern and Western Europe) population sequencing	NA12830	NA12830.22	1000G-mpimg-090522-5	CEU	2009-10-15	32761380	642380	WGS	low coverage	no	ILLUMINA	data/NA12830/sequence_read/ERR006356.filt.fastq.gz	MPIMG	PAIRED	Solexa 1G Genome Analyzer	GENOMIC	164
cellular organisms;Eukaryota;Opisthokonta;Metazoa;Eumetazoa;Bilateria;Coelomata;Deuterostomia;Chordata;Craniata;Vertebrata;Gnathostomata;Teleostomi;Euteleostomi;Sarcopterygii;Tetrapoda;Amniota;Mammalia;Theria;Eutheria;Euarchontoglires;Primates;Haplorrhini;Simiiformes;Catarrhini;Hominoidea;Hominidae;Homininae;Homo;Homo sapiens	51	3e-19	1	cellular organisms;Bacteria;Proteobacteria;Gammaproteobacteria;Enterobacteriales;Enterobacteriaceae;Cronobacter;Cronobacter sakazakii;Cronobacter sakazakii ATCC BAA-894	51	5e-12	ERR006345.sra.6933430	ERR006345	ERX001127	SRS000639	SRP000547	ERA000138	1000 Genomes CEPH (Utah residents with ancestry from Northern and Western Europe) population sequencing	NA12830	NA12830.22	1000G-mpimg-090515-1	CEU	2009-10-06	20819118	408218	WGS	low coverage	no	ILLUMINA	data/NA12830/sequence_read/ERR006345.filt.fastq.gz	MPIMG	PAIRED	Solexa 1G Genome Analyzer	GENOMIC	184
cellular organisms;Eukaryota;Opisthokonta;Metazoa;Eumetazoa;Bilateria;Coelomata;Deuterostomia;Chordata;Craniata;Vertebrata;Gnathostomata;Teleostomi;Euteleostomi;Sarcopterygii;Tetrapoda;Amniota;Mammalia;Theria;Eutheria;Euarchontoglires;Primates;Haplorrhini;Simiiformes;Catarrhini;Hominoidea;Hominidae;Homininae;Homo;Homo sapiens	51	3e-19	1	cellular organisms;Bacteria;Proteobacteria;Betaproteobacteria;Burkholderiales;Burkholderiaceae;Burkholderia;Burkholderia cepacia complex;Burkholderia multivorans;Burkholderia multivorans ATCC 17616	51	8e-17	ERR006348.sra.5314195	ERR006348	ERX001128	SRS000619	SRP000547	ERA000138	1000 Genomes CEPH (Utah residents with ancestry from Northern and Western Europe) population sequencing	NA12282	NA12282.16	1000G-mpimg-090515-5	CEU	2009-10-06	5118666	100366	WGS	low coverage	no	ILLUMINA	data/NA12282/sequence_read/ERR006348.filt.fastq.gz	MPIMG	PAIRED	Solexa 1G Genome Analyzer	GENOMIC	170
cellular organisms;Eukaryota;Opisthokonta;Metazoa;Eumetazoa;Bilateria;Coelomata;Deuterostomia;Chordata;Craniata;Vertebrata;Gnathostomata;Teleostomi;Euteleostomi;Sarcopterygii;Tetrapoda;Amniota;Mammalia;Theria;Eutheria;Euarchontoglires;Primates;Haplorrhini;Simiiformes;Catarrhini;Hominoidea;Hominidae;Homininae;Homo;Homo sapiens	51	3e-19	2	cellular organisms;Bacteria;Actinobacteria;Actinobacteria;Actinobacteridae;Actinomycetales;Corynebacterineae;Mycobacteriaceae;Mycobacterium;Mycobacterium chelonae group;Mycobacterium abscessus subgroup;Mycobacterium abscessus	51	2e-14	ERR006347.sra.7439884	ERR006347	ERX001127	SRS000639	SRP000547	ERA000138	1000 Genomes CEPH (Utah residents with ancestry from Northern and Western Europe) population sequencing	NA12830	NA12830.22	1000G-mpimg-090515-4	CEU	2009-10-06	5770701	113151	WGS	low coverage	no	ILLUMINA	data/NA12830/sequence_read/ERR006347.filt.fastq.gz	MPIMG	PAIRED	Solexa 1G Genome Analyzer	GENOMIC	184
cellular organisms;Eukaryota;Opisthokonta;Metazoa;Eumetazoa;Bilateria;Coelomata;Deuterostomia;Chordata;Craniata;Vertebrata;Gnathostomata;Teleostomi;Euteleostomi;Sarcopterygii;Tetrapoda;Amniota;Mammalia;Theria;Eutheria;Euarchontoglires;Primates;Haplorrhini;Simiiformes;Catarrhini;Hominoidea;Hominidae;Homininae;Homo;Homo sapiens	51	8e-17	1	cellular organisms;Bacteria;Proteobacteria;Gammaproteobacteria;Xanthomonadales;Xanthomonadaceae;Stenotrophomonas;Stenotrophomonas maltophilia group;Stenotrophomonas maltophilia	51	3e-19	ERR006347.sra.2376562	ERR006347	ERX001127	SRS000639	SRP000547	ERA000138	1000 Genomes CEPH (Utah residents with ancestry from Northern and Western Europe) population sequencing	NA12830	NA12830.22	1000G-mpimg-090515-4	CEU	2009-10-06	5770701	113151	WGS	low coverage	no	ILLUMINA	data/NA12830/sequence_read/ERR006347.filt.fastq.gz	MPIMG	PAIRED	Solexa 1G Genome Analyzer	GENOMIC	184
cellular organisms;Eukaryota;Opisthokonta;Metazoa;Eumetazoa;Bilateria;Coelomata;Deuterostomia;Chordata;Craniata;Vertebrata;Gnathostomata;Teleostomi;Euteleostomi;Sarcopterygii;Tetrapoda;Amniota;Mammalia;Theria;Eutheria;Euarchontoglires;Primates;Haplorrhini;Simiiformes;Catarrhini;Hominoidea;Hominidae;Homininae;Homo;Homo sapiens	51	3e-19	1	cellular organisms;Bacteria;Proteobacteria;Gammaproteobacteria;Enterobacteriales;Enterobacteriaceae;Enterobacter;Enterobacter cloacae complex;Enterobacter cloacae;Enterobacter cloacae SCF1	51	8e-17	ERR006347.sra.8314996	ERR006347	ERX001127	SRS000639	SRP000547	ERA000138	1000 Genomes CEPH (Utah residents with ancestry from Northern and Western Europe) population sequencing	NA12830	NA12830.22	1000G-mpimg-090515-4	CEU	2009-10-06	5770701	113151	WGS	low coverage	no	ILLUMINA	data/NA12830/sequence_read/ERR006347.filt.fastq.gz	MPIMG	PAIRED	Solexa 1G Genome Analyzer	GENOMIC	184
cellular organisms;Eukaryota;Opisthokonta;Metazoa;Eumetazoa;Bilateria;Coelomata;Deuterostomia;Chordata;Craniata;Vertebrata;Gnathostomata;Teleostomi;Euteleostomi;Sarcopterygii;Tetrapoda;Amniota;Mammalia;Theria;Eutheria;Euarchontoglires;Primates;Haplorrhini;Simiiformes;Catarrhini;Hominoidea;Hominidae;Homininae;Homo;Homo sapiens	51	3e-19	3	cellular organisms;Bacteria;Proteobacteria;Gammaproteobacteria;Xanthomonadales;Xanthomonadaceae;Stenotrophomonas;Stenotrophomonas maltophilia group;Stenotrophomonas maltophilia	47	2e-14	ERR006355.sra.369998	ERR006355	ERX001132	SRS000639	SRP000547	ERA000139	1000 Genomes CEPH (Utah residents with ancestry from Northern and Western Europe) population sequencing	NA12830	NA12830.22	1000G-mpimg-090522-4	CEU	2009-10-15	66968202	1313102	WGS	low coverage	no	ILLUMINA	data/NA12830/sequence_read/ERR006355.filt.fastq.gz	MPIMG	PAIRED	Solexa 1G Genome Analyzer	GENOMIC	164
cellular organisms;Eukaryota;Opisthokonta;Metazoa;Eumetazoa;Bilateria;Coelomata;Deuterostomia;Chordata;Craniata;Vertebrata;Gnathostomata;Teleostomi;Euteleostomi;Sarcopterygii;Tetrapoda;Amniota;Mammalia;Theria;Eutheria;Euarchontoglires;Primates;Haplorrhini;Simiiformes;Catarrhini;Hominoidea;Hominidae;Homininae;Homo;Homo sapiens	51	3e-19	1	cellular organisms;Bacteria;Proteobacteria;Gammaproteobacteria;Xanthomonadales;Xanthomonadaceae;Stenotrophomonas;Stenotrophomonas maltophilia group;Stenotrophomonas maltophilia	51	3e-19	ERR006345.sra.3778335	ERR006345	ERX001127	SRS000639	SRP000547	ERA000138	1000 Genomes CEPH (Utah residents with ancestry from Northern and Western Europe) population sequencing	NA12830	NA12830.22	1000G-mpimg-090515-1	CEU	2009-10-06	20819118	408218	WGS	low coverage	no	ILLUMINA	data/NA12830/sequence_read/ERR006345.filt.fastq.gz	MPIMG	PAIRED	Solexa 1G Genome Analyzer	GENOMIC	184
cellular organisms;Eukaryota;Opisthokonta;Metazoa;Eumetazoa;Bilateria;Coelomata;Deuterostomia;Chordata;Craniata;Vertebrata;Gnathostomata;Teleostomi;Euteleostomi;Sarcopterygii;Tetrapoda;Amniota;Mammalia;Theria;Eutheria;Euarchontoglires;Primates;Haplorrhini;Simiiformes;Catarrhini;Hominoidea;Hominidae;Homininae;Homo;Homo sapiens	51	8e-17	1	cellular organisms;Bacteria;Proteobacteria;Gammaproteobacteria;Xanthomonadales;Xanthomonadaceae;Stenotrophomonas;Stenotrophomonas maltophilia group;Stenotrophomonas maltophilia;Stenotrophomonas maltophilia K279a	51	3e-19	ERR006347.sra.6263005	ERR006347	ERX001127	SRS000639	SRP000547	ERA000138	1000 Genomes CEPH (Utah residents with ancestry from Northern and Western Europe) population sequencing	NA12830	NA12830.22	1000G-mpimg-090515-4	CEU	2009-10-06	5770701	113151	WGS	low coverage	no	ILLUMINA	data/NA12830/sequence_read/ERR006347.filt.fastq.gz	MPIMG	PAIRED	Solexa 1G Genome Analyzer	GENOMIC	184
cellular organisms;Eukaryota;Opisthokonta;Metazoa;Eumetazoa;Bilateria;Coelomata;Deuterostomia;Chordata;Craniata;Vertebrata;Gnathostomata;Teleostomi;Euteleostomi;Sarcopterygii;Tetrapoda;Amniota;Mammalia;Theria;Eutheria;Euarchontoglires;Primates;Haplorrhini;Simiiformes;Catarrhini;Hominoidea;Hominidae;Homininae;Homo;Homo sapiens	51	3e-19	1	cellular organisms;Bacteria;Proteobacteria;Gammaproteobacteria;Xanthomonadales;Xanthomonadaceae;Stenotrophomonas;Stenotrophomonas maltophilia group;Stenotrophomonas maltophilia	48	1e-12	ERR006448.sra.2266045	ERR006448	ERX001166	SRS000621	SRP000547	ERA000154	1000 Genomes CEPH (Utah residents with ancestry from Northern and Western Europe) population sequencing	NA12286	NA12286.18	1000G-mpimg-090825-10	CEU	2009-10-08	117830145	2310395	WGS	low coverage	no	ILLUMINA	data/NA12286/sequence_read/ERR006448.filt.fastq.gz	MPIMG	PAIRED	Solexa 1G Genome Analyzer	GENOMIC	201
cellular organisms;Eukaryota;Opisthokonta;Metazoa;Eumetazoa;Bilateria;Coelomata;Deuterostomia;Chordata;Craniata;Vertebrata;Gnathostomata;Teleostomi;Euteleostomi;Sarcopterygii;Tetrapoda;Amniota;Mammalia;Theria;Eutheria;Euarchontoglires;Primates;Haplorrhini;Simiiformes;Catarrhini;Hominoidea;Hominidae;Homininae;Homo;Homo sapiens	51	3e-19	1	cellular organisms;Bacteria;Proteobacteria	51	3e-19	ERR006347.sra.2640593	ERR006347	ERX001127	SRS000639	SRP000547	ERA000138	1000 Genomes CEPH (Utah residents with ancestry from Northern and Western Europe) population sequencing	NA12830	NA12830.22	1000G-mpimg-090515-4	CEU	2009-10-06	5770701	113151	WGS	low coverage	no	ILLUMINA	data/NA12830/sequence_read/ERR006347.filt.fastq.gz	MPIMG	PAIRED	Solexa 1G Genome Analyzer	GENOMIC	184
cellular organisms;Eukaryota;Opisthokonta;Metazoa;Eumetazoa;Bilateria;Coelomata;Deuterostomia;Chordata;Craniata;Vertebrata;Gnathostomata;Teleostomi;Euteleostomi;Sarcopterygii;Tetrapoda;Amniota;Mammalia;Theria;Eutheria;Euarchontoglires;Primates;Haplorrhini;Simiiformes;Catarrhini;Hominoidea;Hominidae;Homininae;Homo;Homo sapiens	51	3e-19	1	cellular organisms;Bacteria;Actinobacteria;Actinobacteria;Actinobacteridae;Actinomycetales;Propionibacterineae;Propionibacteriaceae;Propionibacterium;Propionibacterium acnes	51	3e-19	ERR006345.sra.5974789	ERR006345	ERX001127	SRS000639	SRP000547	ERA000138	1000 Genomes CEPH (Utah residents with ancestry from Northern and Western Europe) population sequencing	NA12830	NA12830.22	1000G-mpimg-090515-1	CEU	2009-10-06	20819118	408218	WGS	low coverage	no	ILLUMINA	data/NA12830/sequence_read/ERR006345.filt.fastq.gz	MPIMG	PAIRED	Solexa 1G Genome Analyzer	GENOMIC	184
cellular organisms;Eukaryota;Opisthokonta;Metazoa;Eumetazoa;Bilateria;Coelomata;Deuterostomia;Chordata;Craniata;Vertebrata;Gnathostomata;Teleostomi;Euteleostomi;Sarcopterygii;Tetrapoda;Amniota;Mammalia;Theria;Eutheria;Euarchontoglires;Primates;Haplorrhini;Simiiformes;Catarrhini;Hominoidea;Hominidae	36	2e-10	1	cellular organisms;Bacteria;Deinococcus-Thermus;Deinococci;Thermales;Thermaceae;Thermus;Thermus thermophilus	36	4e-08	ERR002149.sra.1051747	ERR002149	ERX000186	SRS000071	SRP000031	ERA000072	1000Genomes Project Pilot 1	NA12489	g1k-sc-NA12489-CEU-1	IL11_651_2	CEU	2008-12-15	4225896	117386	WGS	low coverage	no	ILLUMINA	data/NA12489/sequence_read/ERR002149.filt.fastq.gz	SC	PAIRED	Solexa 1G Genome Analyzer	GENOMIC	175
cellular organisms;Eukaryota;Opisthokonta;Metazoa;Eumetazoa;Bilateria;Coelomata;Deuterostomia;Chordata;Craniata;Vertebrata;Gnathostomata;Teleostomi;Euteleostomi;Sarcopterygii;Tetrapoda;Amniota;Mammalia;Theria;Eutheria;Euarchontoglires;Primates;Haplorrhini;Simiiformes;Catarrhini;Hominoidea;Hominidae	51	8e-17	1	cellular organisms;Bacteria;Proteobacteria;Gammaproteobacteria;Enterobacteriales;Enterobacteriaceae;Edwardsiella;Edwardsiella ictaluri;Edwardsiella ictaluri 93-146	48	1e-12	ERR006347.sra.11567473	ERR006347	ERX001127	SRS000639	SRP000547	ERA000138	1000 Genomes CEPH (Utah residents with ancestry from Northern and Western Europe) population sequencing	NA12830	NA12830.22	1000G-mpimg-090515-4	CEU	2009-10-06	5770701	113151	WGS	low coverage	no	ILLUMINA	data/NA12830/sequence_read/ERR006347.filt.fastq.gz	MPIMG	PAIRED	Solexa 1G Genome Analyzer	GENOMIC	184
cellular organisms;Eukaryota;Opisthokonta;Metazoa;Eumetazoa;Bilateria;Coelomata;Deuterostomia;Chordata;Craniata;Vertebrata;Gnathostomata;Teleostomi;Euteleostomi;Sarcopterygii;Tetrapoda;Amniota;Mammalia;Theria;Eutheria;Euarchontoglires;Primates;Haplorrhini;Simiiformes;Catarrhini;Hominoidea;Hominidae;Homininae;Homo;Homo sapiens	51	3e-19	1	cellular organisms;Bacteria;Proteobacteria;Gammaproteobacteria;Enterobacteriales;Enterobacteriaceae	47	8e-17	ERR006347.sra.8241484	ERR006347	ERX001127	SRS000639	SRP000547	ERA000138	1000 Genomes CEPH (Utah residents with ancestry from Northern and Western Europe) population sequencing	NA12830	NA12830.22	1000G-mpimg-090515-4	CEU	2009-10-06	5770701	113151	WGS	low coverage	no	ILLUMINA	data/NA12830/sequence_read/ERR006347.filt.fastq.gz	MPIMG	PAIRED	Solexa 1G Genome Analyzer	GENOMIC	184
cellular organisms;Eukaryota;Opisthokonta;Metazoa;Eumetazoa;Bilateria;Coelomata;Deuterostomia;Chordata;Craniata;Vertebrata;Gnathostomata;Teleostomi;Euteleostomi;Sarcopterygii;Tetrapoda;Amniota;Mammalia;Theria;Eutheria;Euarchontoglires;Primates;Haplorrhini;Simiiformes;Catarrhini;Hominoidea;Hominidae;Homininae;Homo;Homo sapiens	51	2e-14	1	cellular organisms;Bacteria;Proteobacteria;Betaproteobacteria;Burkholderiales;Comamonadaceae;Acidovorax;Acidovorax sp. JS42	49	3e-13	ERR006361.sra.2255950	ERR006361	ERX001135	SRS000621	SRP000547	ERA000140	1000 Genomes CEPH (Utah residents with ancestry from Northern and Western Europe) population sequencing	NA12286	NA12286.18	1000G-mpimg-090602-4	CEU	2009-10-06	8361042	163942	WGS	low coverage	no	ILLUMINA	data/NA12286/sequence_read/ERR006361.filt.fastq.gz	MPIMG	PAIRED	Solexa 1G Genome Analyzer	GENOMIC	183
cellular organisms;Eukaryota;Opisthokonta;Metazoa;Eumetazoa;Bilateria;Coelomata;Deuterostomia;Chordata;Craniata;Vertebrata;Gnathostomata;Teleostomi;Euteleostomi;Sarcopterygii;Tetrapoda;Amniota;Mammalia;Theria;Eutheria;Euarchontoglires;Primates;Haplorrhini;Simiiformes;Catarrhini;Hominoidea;Hominidae;Homininae;Homo;Homo sapiens	51	3e-19	1	cellular organisms;Bacteria;Proteobacteria;Gammaproteobacteria;Xanthomonadales;Xanthomonadaceae;Stenotrophomonas;Stenotrophomonas maltophilia group;Stenotrophomonas maltophilia;Stenotrophomonas maltophilia K279a	47	8e-17	ERR006345.sra.8401981	ERR006345	ERX001127	SRS000639	SRP000547	ERA000138	1000 Genomes CEPH (Utah residents with ancestry from Northern and Western Europe) population sequencing	NA12830	NA12830.22	1000G-mpimg-090515-1	CEU	2009-10-06	20819118	408218	WGS	low coverage	no	ILLUMINA	data/NA12830/sequence_read/ERR006345.filt.fastq.gz	MPIMG	PAIRED	Solexa 1G Genome Analyzer	GENOMIC	184
cellular organisms;Eukaryota;Opisthokonta;Metazoa;Eumetazoa;Bilateria;Coelomata;Deuterostomia;Chordata;Craniata;Vertebrata;Gnathostomata;Teleostomi;Euteleostomi;Sarcopterygii;Tetrapoda;Amniota;Mammalia;Theria;Eutheria;Euarchontoglires;Primates;Haplorrhini;Simiiformes;Catarrhini	51	3e-19	1	cellular organisms;Bacteria;Proteobacteria;Gammaproteobacteria;Xanthomonadales;Xanthomonadaceae;Stenotrophomonas;Stenotrophomonas maltophilia group;Stenotrophomonas maltophilia	50	3e-16	ERR006345.sra.10204192	ERR006345	ERX001127	SRS000639	SRP000547	ERA000138	1000 Genomes CEPH (Utah residents with ancestry from Northern and Western Europe) population sequencing	NA12830	NA12830.22	1000G-mpimg-090515-1	CEU	2009-10-06	20819118	408218	WGS	low coverage	no	ILLUMINA	data/NA12830/sequence_read/ERR006345.filt.fastq.gz	MPIMG	PAIRED	Solexa 1G Genome Analyzer	GENOMIC	184
cellular organisms;Eukaryota;Opisthokonta;Metazoa;Eumetazoa;Bilateria;Coelomata;Deuterostomia;Chordata;Craniata;Vertebrata;Gnathostomata;Teleostomi;Euteleostomi;Sarcopterygii;Tetrapoda;Amniota;Mammalia;Theria;Eutheria;Euarchontoglires;Primates;Haplorrhini;Simiiformes;Catarrhini;Hominoidea;Hominidae;Homininae;Homo;Homo sapiens	51	3e-19	2	cellular organisms;Bacteria;Proteobacteria;Gammaproteobacteria;Enterobacteriales;Enterobacteriaceae;Enterobacter;Enterobacter cloacae complex;Enterobacter cloacae;Enterobacter cloacae EcWSU1	51	8e-17	ERR006347.sra.8552278	ERR006347	ERX001127	SRS000639	SRP000547	ERA000138	1000 Genomes CEPH (Utah residents with ancestry from Northern and Western Europe) population sequencing	NA12830	NA12830.22	1000G-mpimg-090515-4	CEU	2009-10-06	5770701	113151	WGS	low coverage	no	ILLUMINA	data/NA12830/sequence_read/ERR006347.filt.fastq.gz	MPIMG	PAIRED	Solexa 1G Genome Analyzer	GENOMIC	184
cellular organisms;Eukaryota;Opisthokonta;Metazoa;Eumetazoa;Bilateria;Coelomata;Deuterostomia;Chordata;Craniata;Vertebrata;Gnathostomata;Teleostomi;Euteleostomi;Sarcopterygii;Tetrapoda;Amniota;Mammalia;Theria;Eutheria;Euarchontoglires;Primates;Haplorrhini;Simiiformes;Catarrhini;Hominoidea;Hominidae;Homininae;Homo;Homo sapiens	51	3e-19	2	cellular organisms;Bacteria;Firmicutes;Bacilli;Lactobacillales;Lactobacillaceae;Lactobacillus;Lactobacillus crispatus;Lactobacillus crispatus ST1	51	8e-17	ERR006347.sra.2685098	ERR006347	ERX001127	SRS000639	SRP000547	ERA000138	1000 Genomes CEPH (Utah residents with ancestry from Northern and Western Europe) population sequencing	NA12830	NA12830.22	1000G-mpimg-090515-4	CEU	2009-10-06	5770701	113151	WGS	low coverage	no	ILLUMINA	data/NA12830/sequence_read/ERR006347.filt.fastq.gz	MPIMG	PAIRED	Solexa 1G Genome Analyzer	GENOMIC	184
cellular organisms;Eukaryota;Opisthokonta;Metazoa;Eumetazoa;Bilateria;Coelomata;Deuterostomia;Chordata;Craniata;Vertebrata;Gnathostomata;Teleostomi;Euteleostomi;Sarcopterygii;Tetrapoda;Amniota;Mammalia;Theria;Eutheria;Euarchontoglires;Primates;Haplorrhini;Simiiformes;Catarrhini;Hominoidea;Hominidae;Homininae;Homo;Homo sapiens	51	3e-19	2	cellular organisms;Bacteria;Proteobacteria;Gammaproteobacteria;Xanthomonadales;Xanthomonadaceae;Stenotrophomonas;Stenotrophomonas maltophilia group;Stenotrophomonas maltophilia	51	3e-19	ERR006347.sra.7169558	ERR006347	ERX001127	SRS000639	SRP000547	ERA000138	1000 Genomes CEPH (Utah residents with ancestry from Northern and Western Europe) population sequencing	NA12830	NA12830.22	1000G-mpimg-090515-4	CEU	2009-10-06	5770701	113151	WGS	low coverage	no	ILLUMINA	data/NA12830/sequence_read/ERR006347.filt.fastq.gz	MPIMG	PAIRED	Solexa 1G Genome Analyzer	GENOMIC	184
cellular organisms;Eukaryota;Opisthokonta;Metazoa;Eumetazoa;Bilateria;Coelomata;Deuterostomia;Chordata;Craniata;Vertebrata;Gnathostomata;Teleostomi;Euteleostomi;Sarcopterygii;Tetrapoda;Amniota;Mammalia;Theria;Eutheria;Euarchontoglires;Primates;Haplorrhini;Simiiformes;Catarrhini;Hominoidea;Hominidae;Homininae;Homo;Homo sapiens	51	3e-19	1	cellular organisms;Bacteria;Proteobacteria;Betaproteobacteria;Burkholderiales;Comamonadaceae;Acidovorax	48	2e-17	ERR006388.sra.16527175	ERR006388	ERX001146	SRS000640	SRP000547	ERA000144	1000 Genomes CEPH (Utah residents with ancestry from Northern and Western Europe) population sequencing	NA12842	NA12842.23	1000G-mpimg-090625-5	CEU	2009-10-06	64079256	1256456	WGS	low coverage	no	ILLUMINA	data/NA12842/sequence_read/ERR006388.filt.fastq.gz	MPIMG	PAIRED	Solexa 1G Genome Analyzer	GENOMIC	171
cellular organisms;Eukaryota;Opisthokonta;Metazoa;Eumetazoa;Bilateria;Coelomata;Deuterostomia;Chordata;Craniata;Vertebrata;Gnathostomata;Teleostomi;Euteleostomi;Sarcopterygii;Tetrapoda;Amniota;Mammalia;Theria;Eutheria;Euarchontoglires;Primates;Haplorrhini;Simiiformes;Catarrhini;Hominoidea;Hominidae;Homininae;Homo;Homo sapiens	36	2e-10	1	cellular organisms;Bacteria;Firmicutes;Bacilli;Bacillales;Staphylococcaceae;Staphylococcus;Staphylococcus epidermidis	36	2e-10	ERR006311.sra.1919761	ERR006311	ERX001114	SRS000643	SRP000547	ERA000132	1000 Genomes CEPH (Utah residents with ancestry from Northern and Western Europe) population sequencing	NA12890	NA12890.26	1000G-mpimg-090320-7	CEU	2009-10-06	253237068	7034363	WGS	low coverage	no	ILLUMINA	data/NA12890/sequence_read/ERR006311.filt.fastq.gz	MPIMG	PAIRED	Solexa 1G Genome Analyzer	GENOMIC	179
cellular organisms;Eukaryota;Opisthokonta;Metazoa;Eumetazoa;Bilateria;Coelomata;Deuterostomia;Chordata;Craniata;Vertebrata;Gnathostomata;Teleostomi;Euteleostomi;Sarcopterygii;Tetrapoda;Amniota;Mammalia;Theria;Eutheria;Euarchontoglires;Primates;Haplorrhini;Simiiformes;Catarrhini;Hominoidea;Hominidae;Homininae;Homo;Homo sapiens	51	2e-14	1	cellular organisms;Bacteria;Proteobacteria;Gammaproteobacteria;Xanthomonadales;Xanthomonadaceae;Stenotrophomonas;Stenotrophomonas maltophilia group;Stenotrophomonas maltophilia	50	1e-18	ERR006347.sra.7904007	ERR006347	ERX001127	SRS000639	SRP000547	ERA000138	1000 Genomes CEPH (Utah residents with ancestry from Northern and Western Europe) population sequencing	NA12830	NA12830.22	1000G-mpimg-090515-4	CEU	2009-10-06	5770701	113151	WGS	low coverage	no	ILLUMINA	data/NA12830/sequence_read/ERR006347.filt.fastq.gz	MPIMG	PAIRED	Solexa 1G Genome Analyzer	GENOMIC	184
cellular organisms;Eukaryota;Opisthokonta;Metazoa;Eumetazoa;Bilateria;Coelomata;Deuterostomia;Chordata;Craniata;Vertebrata;Gnathostomata;Teleostomi;Euteleostomi;Sarcopterygii;Tetrapoda;Amniota;Mammalia;Theria;Eutheria;Euarchontoglires;Primates;Haplorrhini;Simiiformes;Catarrhini;Hominoidea;Hominidae;Homininae;Homo;Homo sapiens	51	3e-19	1	cellular organisms;Bacteria;Proteobacteria;Gammaproteobacteria;Enterobacteriales;Enterobacteriaceae;Serratia	51	8e-17	ERR006347.sra.2344149	ERR006347	ERX001127	SRS000639	SRP000547	ERA000138	1000 Genomes CEPH (Utah residents with ancestry from Northern and Western Europe) population sequencing	NA12830	NA12830.22	1000G-mpimg-090515-4	CEU	2009-10-06	5770701	113151	WGS	low coverage	no	ILLUMINA	data/NA12830/sequence_read/ERR006347.filt.fastq.gz	MPIMG	PAIRED	Solexa 1G Genome Analyzer	GENOMIC	184
cellular organisms;Eukaryota;Opisthokonta;Metazoa;Eumetazoa;Bilateria;Coelomata;Deuterostomia;Chordata;Craniata;Vertebrata;Gnathostomata;Teleostomi;Euteleostomi;Sarcopterygii;Tetrapoda;Amniota;Mammalia;Theria;Eutheria;Euarchontoglires;Primates;Haplorrhini;Simiiformes;Catarrhini;Hominoidea;Hominidae	51	3e-19	1	cellular organisms;Bacteria;Proteobacteria;Gammaproteobacteria;Xanthomonadales;Xanthomonadaceae;Stenotrophomonas;Stenotrophomonas maltophilia group;Stenotrophomonas maltophilia	51	5e-12	ERR006347.sra.10766379	ERR006347	ERX001127	SRS000639	SRP000547	ERA000138	1000 Genomes CEPH (Utah residents with ancestry from Northern and Western Europe) population sequencing	NA12830	NA12830.22	1000G-mpimg-090515-4	CEU	2009-10-06	5770701	113151	WGS	low coverage	no	ILLUMINA	data/NA12830/sequence_read/ERR006347.filt.fastq.gz	MPIMG	PAIRED	Solexa 1G Genome Analyzer	GENOMIC	184
cellular organisms;Eukaryota;Opisthokonta;Metazoa;Eumetazoa;Bilateria;Coelomata;Deuterostomia;Chordata;Craniata;Vertebrata;Gnathostomata;Teleostomi;Euteleostomi;Sarcopterygii;Tetrapoda;Amniota;Mammalia;Theria;Eutheria;Euarchontoglires;Primates;Haplorrhini;Simiiformes;Catarrhini;Hominoidea;Hominidae;Homininae;Homo;Homo sapiens	51	8e-17	3	cellular organisms;Bacteria;Proteobacteria;Gammaproteobacteria;Enterobacteriales;Enterobacteriaceae;Serratia	50	3e-16	ERR006347.sra.1587954	ERR006347	ERX001127	SRS000639	SRP000547	ERA000138	1000 Genomes CEPH (Utah residents with ancestry from Northern and Western Europe) population sequencing	NA12830	NA12830.22	1000G-mpimg-090515-4	CEU	2009-10-06	5770701	113151	WGS	low coverage	no	ILLUMINA	data/NA12830/sequence_read/ERR006347.filt.fastq.gz	MPIMG	PAIRED	Solexa 1G Genome Analyzer	GENOMIC	184
cellular organisms;Eukaryota;Opisthokonta;Metazoa;Eumetazoa;Bilateria;Coelomata;Deuterostomia;Chordata;Craniata;Vertebrata;Gnathostomata;Teleostomi;Euteleostomi;Sarcopterygii;Tetrapoda;Amniota;Mammalia;Theria;Eutheria;Euarchontoglires;Primates;Haplorrhini;Simiiformes;Catarrhini;Hominoidea;Hominidae;Homininae;Homo;Homo sapiens	51	3e-19	1	cellular organisms;Bacteria;Proteobacteria	51	3e-19	ERR006388.sra.16305046	ERR006388	ERX001146	SRS000640	SRP000547	ERA000144	1000 Genomes CEPH (Utah residents with ancestry from Northern and Western Europe) population sequencing	NA12842	NA12842.23	1000G-mpimg-090625-5	CEU	2009-10-06	64079256	1256456	WGS	low coverage	no	ILLUMINA	data/NA12842/sequence_read/ERR006388.filt.fastq.gz	MPIMG	PAIRED	Solexa 1G Genome Analyzer	GENOMIC	171
cellular organisms;Eukaryota;Opisthokonta;Metazoa;Eumetazoa;Bilateria;Coelomata;Deuterostomia;Chordata;Craniata;Vertebrata;Gnathostomata;Teleostomi;Euteleostomi;Sarcopterygii;Tetrapoda;Amniota;Mammalia;Theria;Eutheria;Euarchontoglires;Primates;Haplorrhini;Simiiformes;Catarrhini;Hominoidea;Hominidae;Homininae;Homo;Homo sapiens	51	3e-19	1	cellular organisms;Bacteria;Proteobacteria;Gammaproteobacteria;Xanthomonadales;Xanthomonadaceae;Stenotrophomonas;Stenotrophomonas maltophilia group;Stenotrophomonas maltophilia;Stenotrophomonas maltophilia K279a	51	5e-12	ERR006347.sra.5730974	ERR006347	ERX001127	SRS000639	SRP000547	ERA000138	1000 Genomes CEPH (Utah residents with ancestry from Northern and Western Europe) population sequencing	NA12830	NA12830.22	1000G-mpimg-090515-4	CEU	2009-10-06	5770701	113151	WGS	low coverage	no	ILLUMINA	data/NA12830/sequence_read/ERR006347.filt.fastq.gz	MPIMG	PAIRED	Solexa 1G Genome Analyzer	GENOMIC	184
cellular organisms;Eukaryota;Opisthokonta;Metazoa;Eumetazoa;Bilateria;Coelomata;Deuterostomia;Chordata;Craniata;Vertebrata;Gnathostomata;Teleostomi;Euteleostomi;Sarcopterygii;Tetrapoda;Amniota;Mammalia;Theria;Eutheria;Euarchontoglires;Primates;Haplorrhini;Simiiformes;Catarrhini;Hominoidea;Hominidae;Homininae;Homo;Homo sapiens	51	3e-19	1	cellular organisms;Bacteria;Proteobacteria;Gammaproteobacteria;Xanthomonadales;Xanthomonadaceae;Stenotrophomonas;Stenotrophomonas maltophilia group;Stenotrophomonas maltophilia	51	8e-17	ERR006346.sra.6957713	ERR006346	ERX001127	SRS000639	SRP000547	ERA000138	1000 Genomes CEPH (Utah residents with ancestry from Northern and Western Europe) population sequencing	NA12830	NA12830.22	1000G-mpimg-090515-2	CEU	2009-10-06	10555929	206979	WGS	low coverage	no	ILLUMINA	data/NA12830/sequence_read/ERR006346.filt.fastq.gz	MPIMG	PAIRED	Solexa 1G Genome Analyzer	GENOMIC	184
cellular organisms;Eukaryota;Opisthokonta;Metazoa;Eumetazoa;Bilateria;Coelomata;Deuterostomia;Chordata;Craniata;Vertebrata;Gnathostomata;Teleostomi;Euteleostomi;Sarcopterygii;Tetrapoda;Amniota;Mammalia;Theria;Eutheria;Euarchontoglires;Primates;Haplorrhini;Simiiformes;Catarrhini;Hominoidea;Hominidae;Homininae;Homo;Homo sapiens	51	3e-19	2	cellular organisms;Bacteria;Proteobacteria;Gammaproteobacteria;Xanthomonadales;Xanthomonadaceae;Stenotrophomonas;Stenotrophomonas maltophilia group;Stenotrophomonas maltophilia	51	3e-19	ERR006345.sra.9662873	ERR006345	ERX001127	SRS000639	SRP000547	ERA000138	1000 Genomes CEPH (Utah residents with ancestry from Northern and Western Europe) population sequencing	NA12830	NA12830.22	1000G-mpimg-090515-1	CEU	2009-10-06	20819118	408218	WGS	low coverage	no	ILLUMINA	data/NA12830/sequence_read/ERR006345.filt.fastq.gz	MPIMG	PAIRED	Solexa 1G Genome Analyzer	GENOMIC	184
cellular organisms;Eukaryota;Opisthokonta;Metazoa;Eumetazoa;Bilateria;Coelomata;Deuterostomia;Chordata;Craniata;Vertebrata;Gnathostomata;Teleostomi;Euteleostomi;Sarcopterygii;Tetrapoda;Amniota;Mammalia;Theria;Eutheria;Euarchontoglires;Primates;Haplorrhini;Simiiformes;Catarrhini;Hominoidea;Hominidae;Homininae;Homo;Homo sapiens	51	3e-19	1	cellular organisms;Bacteria;Proteobacteria;Gammaproteobacteria;Enterobacteriales;Enterobacteriaceae;Enterobacter;Enterobacter aerogenes;Enterobacter aerogenes KCTC 2190	50	1e-18	ERR006347.sra.9813170	ERR006347	ERX001127	SRS000639	SRP000547	ERA000138	1000 Genomes CEPH (Utah residents with ancestry from Northern and Western Europe) population sequencing	NA12830	NA12830.22	1000G-mpimg-090515-4	CEU	2009-10-06	5770701	113151	WGS	low coverage	no	ILLUMINA	data/NA12830/sequence_read/ERR006347.filt.fastq.gz	MPIMG	PAIRED	Solexa 1G Genome Analyzer	GENOMIC	184
cellular organisms;Eukaryota;Opisthokonta;Metazoa;Eumetazoa;Bilateria;Coelomata;Deuterostomia;Chordata;Craniata;Vertebrata;Gnathostomata;Teleostomi;Euteleostomi;Sarcopterygii;Tetrapoda;Amniota;Mammalia;Theria;Eutheria;Euarchontoglires;Primates;Haplorrhini;Simiiformes;Catarrhini;Hominoidea;Hominidae;Homininae;Homo;Homo sapiens	51	3e-19	1	cellular organisms;Bacteria;Proteobacteria	51	2e-14	ERR006356.sra.198803	ERR006356	ERX001132	SRS000639	SRP000547	ERA000139	1000 Genomes CEPH (Utah residents with ancestry from Northern and Western Europe) population sequencing	NA12830	NA12830.22	1000G-mpimg-090522-5	CEU	2009-10-15	32761380	642380	WGS	low coverage	no	ILLUMINA	data/NA12830/sequence_read/ERR006356.filt.fastq.gz	MPIMG	PAIRED	Solexa 1G Genome Analyzer	GENOMIC	164
cellular organisms;Eukaryota;Opisthokonta;Metazoa;Eumetazoa;Bilateria;Coelomata;Deuterostomia;Chordata;Craniata;Vertebrata;Gnathostomata;Teleostomi;Euteleostomi;Sarcopterygii;Tetrapoda;Amniota;Mammalia;Theria;Eutheria;Euarchontoglires;Primates;Haplorrhini;Simiiformes;Catarrhini;Hominoidea;Hominidae;Homininae;Homo;Homo sapiens	51	3e-19	1	cellular organisms;Bacteria;Proteobacteria;Betaproteobacteria;Burkholderiales;Comamonadaceae;Acidovorax	39	5e-12	ERR006372.sra.5310166	ERR006372	ERX001140	SRS000620	SRP000547	ERA000142	1000 Genomes CEPH (Utah residents with ancestry from Northern and Western Europe) population sequencing	NA12283	NA12283.17	1000G-mpimg-090611-5	CEU	2009-10-06	27876447	546597	WGS	low coverage	no	ILLUMINA	data/NA12283/sequence_read/ERR006372.filt.fastq.gz	MPIMG	PAIRED	Solexa 1G Genome Analyzer	GENOMIC	178
cellular organisms;Eukaryota;Opisthokonta;Metazoa;Eumetazoa;Bilateria;Coelomata;Deuterostomia;Chordata;Craniata;Vertebrata;Gnathostomata;Teleostomi;Euteleostomi;Sarcopterygii;Tetrapoda;Amniota;Mammalia;Theria;Eutheria;Euarchontoglires;Primates;Haplorrhini;Simiiformes;Catarrhini;Hominoidea;Hominidae;Homininae;Homo;Homo sapiens	51	3e-19	3	cellular organisms;Bacteria;Proteobacteria;Gammaproteobacteria;Xanthomonadales;Xanthomonadaceae;Stenotrophomonas;Stenotrophomonas maltophilia group;Stenotrophomonas maltophilia	51	8e-17	ERR006347.sra.5482672	ERR006347	ERX001127	SRS000639	SRP000547	ERA000138	1000 Genomes CEPH (Utah residents with ancestry from Northern and Western Europe) population sequencing	NA12830	NA12830.22	1000G-mpimg-090515-4	CEU	2009-10-06	5770701	113151	WGS	low coverage	no	ILLUMINA	data/NA12830/sequence_read/ERR006347.filt.fastq.gz	MPIMG	PAIRED	Solexa 1G Genome Analyzer	GENOMIC	184
cellular organisms;Eukaryota;Opisthokonta;Metazoa;Eumetazoa;Bilateria;Coelomata;Deuterostomia;Chordata;Craniata;Vertebrata;Gnathostomata;Teleostomi;Euteleostomi;Sarcopterygii;Tetrapoda;Amniota;Mammalia;Theria;Eutheria;Euarchontoglires;Primates;Haplorrhini;Simiiformes;Catarrhini;Hominoidea;Hominidae;Homininae;Homo;Homo sapiens	51	8e-17	1	cellular organisms;Bacteria;Proteobacteria;Betaproteobacteria;Burkholderiales;Comamonadaceae;Acidovorax	48	2e-17	ERR006449.sra.13524412	ERR006449	ERX001166	SRS000621	SRP000547	ERA000154	1000 Genomes CEPH (Utah residents with ancestry from Northern and Western Europe) population sequencing	NA12286	NA12286.18	1000G-mpimg-090825-11	CEU	2009-10-08	60190608	1180208	WGS	low coverage	no	ILLUMINA	data/NA12286/sequence_read/ERR006449.filt.fastq.gz	MPIMG	PAIRED	Solexa 1G Genome Analyzer	GENOMIC	201
cellular organisms;Eukaryota;Opisthokonta;Metazoa;Eumetazoa;Bilateria;Coelomata;Deuterostomia;Chordata;Craniata;Vertebrata;Gnathostomata;Teleostomi;Euteleostomi;Sarcopterygii;Tetrapoda;Amniota;Mammalia;Theria;Eutheria;Euarchontoglires;Primates;Haplorrhini;Simiiformes;Catarrhini;Hominoidea;Hominidae;Homininae;Homo;Homo sapiens	51	3e-19	1	cellular organisms;Bacteria;Proteobacteria;Gammaproteobacteria;Enterobacteriales;Enterobacteriaceae;Serratia;Serratia proteamaculans;Serratia proteamaculans 568	51	8e-17	ERR006347.sra.1101492	ERR006347	ERX001127	SRS000639	SRP000547	ERA000138	1000 Genomes CEPH (Utah residents with ancestry from Northern and Western Europe) population sequencing	NA12830	NA12830.22	1000G-mpimg-090515-4	CEU	2009-10-06	5770701	113151	WGS	low coverage	no	ILLUMINA	data/NA12830/sequence_read/ERR006347.filt.fastq.gz	MPIMG	PAIRED	Solexa 1G Genome Analyzer	GENOMIC	184
cellular organisms;Eukaryota;Opisthokonta;Metazoa;Eumetazoa;Bilateria;Coelomata;Deuterostomia;Chordata;Craniata;Vertebrata;Gnathostomata;Teleostomi;Euteleostomi;Sarcopterygii;Tetrapoda;Amniota;Mammalia;Theria;Eutheria;Euarchontoglires;Primates;Haplorrhini;Simiiformes;Catarrhini;Hominoidea;Hominidae;Homininae;Homo;Homo sapiens	47	8e-17	1	cellular organisms;Bacteria;Proteobacteria;Gammaproteobacteria;Xanthomonadales;Xanthomonadaceae;Stenotrophomonas;Stenotrophomonas maltophilia group;Stenotrophomonas maltophilia;Stenotrophomonas maltophilia D457	51	3e-19	ERR006356.sra.1936287	ERR006356	ERX001132	SRS000639	SRP000547	ERA000139	1000 Genomes CEPH (Utah residents with ancestry from Northern and Western Europe) population sequencing	NA12830	NA12830.22	1000G-mpimg-090522-5	CEU	2009-10-15	32761380	642380	WGS	low coverage	no	ILLUMINA	data/NA12830/sequence_read/ERR006356.filt.fastq.gz	MPIMG	PAIRED	Solexa 1G Genome Analyzer	GENOMIC	164
cellular organisms;Eukaryota;Opisthokonta;Metazoa;Eumetazoa;Bilateria;Coelomata;Deuterostomia;Chordata;Craniata;Vertebrata;Gnathostomata;Teleostomi;Euteleostomi;Sarcopterygii;Tetrapoda;Amniota;Mammalia;Theria;Eutheria;Euarchontoglires;Primates;Haplorrhini;Simiiformes;Catarrhini;Hominoidea;Hominidae;Homininae;Homo;Homo sapiens	51	3e-19	2	cellular organisms;Bacteria;Proteobacteria;Gammaproteobacteria;Xanthomonadales;Xanthomonadaceae;Stenotrophomonas;Stenotrophomonas maltophilia group;Stenotrophomonas maltophilia	51	5e-12	ERR006345.sra.2404271	ERR006345	ERX001127	SRS000639	SRP000547	ERA000138	1000 Genomes CEPH (Utah residents with ancestry from Northern and Western Europe) population sequencing	NA12830	NA12830.22	1000G-mpimg-090515-1	CEU	2009-10-06	20819118	408218	WGS	low coverage	no	ILLUMINA	data/NA12830/sequence_read/ERR006345.filt.fastq.gz	MPIMG	PAIRED	Solexa 1G Genome Analyzer	GENOMIC	184
cellular organisms;Eukaryota;Opisthokonta;Metazoa;Eumetazoa;Bilateria;Coelomata;Deuterostomia;Chordata;Craniata;Vertebrata;Gnathostomata;Teleostomi;Euteleostomi;Sarcopterygii;Tetrapoda;Amniota;Mammalia;Theria;Eutheria;Euarchontoglires;Primates;Haplorrhini;Simiiformes;Catarrhini;Hominoidea;Hominidae	51	3e-19	1	cellular organisms;Bacteria;Proteobacteria;Gammaproteobacteria;Xanthomonadales;Xanthomonadaceae;Stenotrophomonas;Stenotrophomonas maltophilia group;Stenotrophomonas maltophilia;Stenotrophomonas maltophilia R551-3	51	8e-17	ERR006390.sra.21309012	ERR006390	ERX001146	SRS000640	SRP000547	ERA000144	1000 Genomes CEPH (Utah residents with ancestry from Northern and Western Europe) population sequencing	NA12842	NA12842.23	1000G-mpimg-090625-8	CEU	2009-10-06	100035786	1961486	WGS	low coverage	no	ILLUMINA	data/NA12842/sequence_read/ERR006390.filt.fastq.gz	MPIMG	PAIRED	Solexa 1G Genome Analyzer	GENOMIC	171
cellular organisms;Eukaryota;Opisthokonta;Metazoa;Eumetazoa;Bilateria;Coelomata;Deuterostomia;Chordata;Craniata;Vertebrata;Gnathostomata;Teleostomi;Euteleostomi;Sarcopterygii;Tetrapoda;Amniota;Mammalia;Theria;Eutheria;Euarchontoglires;Primates;Haplorrhini;Simiiformes;Catarrhini;Hominoidea;Hominidae	52	5e-15	1	cellular organisms;Bacteria;Proteobacteria;Gammaproteobacteria;Xanthomonadales;Xanthomonadaceae;Stenotrophomonas;Stenotrophomonas maltophilia group;Stenotrophomonas maltophilia	51	2e-14	ERR006347.sra.1491283	ERR006347	ERX001127	SRS000639	SRP000547	ERA000138	1000 Genomes CEPH (Utah residents with ancestry from Northern and Western Europe) population sequencing	NA12830	NA12830.22	1000G-mpimg-090515-4	CEU	2009-10-06	5770701	113151	WGS	low coverage	no	ILLUMINA	data/NA12830/sequence_read/ERR006347.filt.fastq.gz	MPIMG	PAIRED	Solexa 1G Genome Analyzer	GENOMIC	184
cellular organisms;Eukaryota;Opisthokonta;Metazoa;Eumetazoa;Bilateria;Coelomata;Deuterostomia;Chordata;Craniata;Vertebrata;Gnathostomata;Teleostomi;Euteleostomi;Sarcopterygii;Tetrapoda;Amniota;Mammalia;Theria;Eutheria;Euarchontoglires;Primates;Haplorrhini;Simiiformes;Catarrhini;Hominoidea;Hominidae;Homininae;Homo;Homo sapiens	51	3e-19	1	cellular organisms;Bacteria;Proteobacteria;Gammaproteobacteria;Xanthomonadales;Xanthomonadaceae;Stenotrophomonas;Stenotrophomonas maltophilia group;Stenotrophomonas maltophilia	51	8e-17	ERR006347.sra.2212273	ERR006347	ERX001127	SRS000639	SRP000547	ERA000138	1000 Genomes CEPH (Utah residents with ancestry from Northern and Western Europe) population sequencing	NA12830	NA12830.22	1000G-mpimg-090515-4	CEU	2009-10-06	5770701	113151	WGS	low coverage	no	ILLUMINA	data/NA12830/sequence_read/ERR006347.filt.fastq.gz	MPIMG	PAIRED	Solexa 1G Genome Analyzer	GENOMIC	184
cellular organisms;Eukaryota;Opisthokonta;Metazoa;Eumetazoa;Bilateria;Coelomata;Deuterostomia;Chordata;Craniata;Vertebrata;Gnathostomata;Teleostomi;Euteleostomi;Sarcopterygii;Tetrapoda;Amniota;Mammalia;Theria;Eutheria;Euarchontoglires;Primates;Haplorrhini;Simiiformes;Catarrhini;Hominoidea;Hominidae;Homininae;Homo;Homo sapiens	51	3e-19	3	cellular organisms;Bacteria;Proteobacteria;Gammaproteobacteria;Xanthomonadales;Xanthomonadaceae;Stenotrophomonas;Stenotrophomonas maltophilia group;Stenotrophomonas maltophilia	44	1e-12	ERR006366.sra.14209548	ERR006366	ERX001138	SRS000639	SRP000547	ERA000141	1000 Genomes CEPH (Utah residents with ancestry from Northern and Western Europe) population sequencing	NA12830	NA12830.22	1000G-mpimg-090608-1	CEU	2009-10-06	58676877	1150527	WGS	low coverage	no	ILLUMINA	data/NA12830/sequence_read/ERR006366.filt.fastq.gz	MPIMG	PAIRED	Solexa 1G Genome Analyzer	GENOMIC	145
cellular organisms;Eukaryota;Opisthokonta;Metazoa;Eumetazoa;Bilateria;Coelomata;Deuterostomia;Chordata;Craniata;Vertebrata;Gnathostomata;Teleostomi;Euteleostomi;Sarcopterygii;Tetrapoda;Amniota;Mammalia;Theria;Eutheria;Euarchontoglires;Primates;Haplorrhini;Simiiformes;Catarrhini;Hominoidea;Hominidae;Homininae;Homo;Homo sapiens	51	8e-17	1	cellular organisms;Bacteria;Proteobacteria;Gammaproteobacteria;Xanthomonadales;Xanthomonadaceae;Stenotrophomonas;Stenotrophomonas maltophilia group;Stenotrophomonas maltophilia	51	8e-17	ERR006353.sra.4959764	ERR006353	ERX001132	SRS000639	SRP000547	ERA000139	1000 Genomes CEPH (Utah residents with ancestry from Northern and Western Europe) population sequencing	NA12830	NA12830.22	1000G-mpimg-090522-2	CEU	2009-10-15	8527659	167209	WGS	low coverage	no	ILLUMINA	data/NA12830/sequence_read/ERR006353.filt.fastq.gz	MPIMG	PAIRED	Solexa 1G Genome Analyzer	GENOMIC	164
cellular organisms;Eukaryota;Opisthokonta;Metazoa;Eumetazoa;Bilateria;Coelomata;Deuterostomia;Chordata;Craniata;Vertebrata;Gnathostomata;Teleostomi;Euteleostomi;Sarcopterygii;Tetrapoda;Amniota;Mammalia;Theria;Eutheria;Euarchontoglires;Primates;Haplorrhini;Simiiformes;Catarrhini;Hominoidea;Hominidae;Homininae;Homo;Homo sapiens	51	3e-19	2	cellular organisms;Bacteria;Proteobacteria;Gammaproteobacteria;Xanthomonadales;Xanthomonadaceae;Stenotrophomonas;Stenotrophomonas maltophilia group;Stenotrophomonas maltophilia	51	5e-12	ERR006347.sra.11632349	ERR006347	ERX001127	SRS000639	SRP000547	ERA000138	1000 Genomes CEPH (Utah residents with ancestry from Northern and Western Europe) population sequencing	NA12830	NA12830.22	1000G-mpimg-090515-4	CEU	2009-10-06	5770701	113151	WGS	low coverage	no	ILLUMINA	data/NA12830/sequence_read/ERR006347.filt.fastq.gz	MPIMG	PAIRED	Solexa 1G Genome Analyzer	GENOMIC	184
cellular organisms;Eukaryota;Opisthokonta;Metazoa;Eumetazoa;Bilateria;Coelomata;Deuterostomia;Chordata;Craniata;Vertebrata;Gnathostomata;Teleostomi;Euteleostomi;Sarcopterygii;Tetrapoda;Amniota;Mammalia;Theria;Eutheria;Euarchontoglires;Primates;Haplorrhini;Simiiformes;Catarrhini;Hominoidea;Hominidae;Homininae;Homo;Homo sapiens	32	4e-08	1	cellular organisms;Bacteria;Proteobacteria;Gammaproteobacteria;Enterobacteriales;Enterobacteriaceae	36	2e-10	ERR006274.sra.9379412	ERR006274	ERX001102	SRS000641	SRP000547	ERA000128	1000 Genomes CEPH (Utah residents with ancestry from Northern and Western Europe) population sequencing	NA12843	NA12843.24	1000G-mpimg-090226-2	CEU	2009-10-06	26767044	743529	WGS	low coverage	no	ILLUMINA	data/NA12843/sequence_read/ERR006274.filt.fastq.gz	MPIMG	PAIRED	Solexa 1G Genome Analyzer	GENOMIC	187
cellular organisms;Eukaryota;Opisthokonta;Metazoa;Eumetazoa;Bilateria;Coelomata;Deuterostomia;Chordata;Craniata;Vertebrata;Gnathostomata;Teleostomi;Euteleostomi;Sarcopterygii;Tetrapoda;Amniota;Mammalia;Theria;Eutheria;Euarchontoglires;Primates;Haplorrhini;Simiiformes;Catarrhini;Hominoidea;Hominidae;Homininae;Homo;Homo sapiens	51	3e-19	1	cellular organisms;Bacteria;Proteobacteria;Gammaproteobacteria;Xanthomonadales;Xanthomonadaceae;Stenotrophomonas;Stenotrophomonas maltophilia group;Stenotrophomonas maltophilia;Stenotrophomonas maltophilia D457	50	1e-18	ERR006345.sra.3480366	ERR006345	ERX001127	SRS000639	SRP000547	ERA000138	1000 Genomes CEPH (Utah residents with ancestry from Northern and Western Europe) population sequencing	NA12830	NA12830.22	1000G-mpimg-090515-1	CEU	2009-10-06	20819118	408218	WGS	low coverage	no	ILLUMINA	data/NA12830/sequence_read/ERR006345.filt.fastq.gz	MPIMG	PAIRED	Solexa 1G Genome Analyzer	GENOMIC	184
cellular organisms;Eukaryota;Opisthokonta;Metazoa;Eumetazoa;Bilateria;Coelomata;Deuterostomia;Chordata;Craniata;Vertebrata;Gnathostomata;Teleostomi;Euteleostomi;Sarcopterygii;Tetrapoda;Amniota;Mammalia;Theria;Eutheria;Euarchontoglires;Primates;Haplorrhini;Simiiformes;Catarrhini;Hominoidea	51	3e-19	1	cellular organisms;Bacteria;Proteobacteria;Gammaproteobacteria;Enterobacteriales;Enterobacteriaceae;Serratia	48	1e-12	ERR006347.sra.2401306	ERR006347	ERX001127	SRS000639	SRP000547	ERA000138	1000 Genomes CEPH (Utah residents with ancestry from Northern and Western Europe) population sequencing	NA12830	NA12830.22	1000G-mpimg-090515-4	CEU	2009-10-06	5770701	113151	WGS	low coverage	no	ILLUMINA	data/NA12830/sequence_read/ERR006347.filt.fastq.gz	MPIMG	PAIRED	Solexa 1G Genome Analyzer	GENOMIC	184
cellular organisms;Eukaryota;Opisthokonta;Metazoa;Eumetazoa;Bilateria;Coelomata;Deuterostomia;Chordata;Craniata;Vertebrata;Gnathostomata;Teleostomi;Euteleostomi;Sarcopterygii;Tetrapoda;Amniota;Mammalia;Theria;Eutheria;Euarchontoglires;Primates;Haplorrhini;Simiiformes;Catarrhini;Hominoidea;Hominidae;Homininae;Homo;Homo sapiens	51	3e-19	2	cellular organisms;Bacteria;Proteobacteria	51	3e-19	ERR006355.sra.5361179	ERR006355	ERX001132	SRS000639	SRP000547	ERA000139	1000 Genomes CEPH (Utah residents with ancestry from Northern and Western Europe) population sequencing	NA12830	NA12830.22	1000G-mpimg-090522-4	CEU	2009-10-15	66968202	1313102	WGS	low coverage	no	ILLUMINA	data/NA12830/sequence_read/ERR006355.filt.fastq.gz	MPIMG	PAIRED	Solexa 1G Genome Analyzer	GENOMIC	164
cellular organisms;Eukaryota;Opisthokonta;Metazoa;Eumetazoa;Bilateria;Coelomata;Deuterostomia;Chordata;Craniata;Vertebrata;Gnathostomata;Teleostomi;Euteleostomi;Sarcopterygii;Tetrapoda;Amniota;Mammalia;Theria;Eutheria;Euarchontoglires;Primates;Haplorrhini;Simiiformes;Catarrhini;Hominoidea;Hominidae;Homininae;Homo;Homo sapiens	36	2e-10	1	cellular organisms;Bacteria;Firmicutes;Bacilli;Bacillales;Staphylococcaceae;Staphylococcus;Staphylococcus epidermidis	36	9e-06	ERR001895.sra.5751954	ERR001895	ERX000175	SRS000092	SRP000032	ERA000070	1000Genomes Project Pilot 2	NA12892	g1k-sc-NA12892-CEU-2	IL10_463_7	CEU	2008-12-15	630288	17508	WGS	high coverage	no	ILLUMINA	data/NA12892/sequence_read/ERR001895.filt.fastq.gz	SC	PAIRED	Solexa 1G Genome Analyzer	GENOMIC	175
cellular organisms;Eukaryota;Opisthokonta;Metazoa;Eumetazoa;Bilateria;Coelomata;Deuterostomia;Chordata;Craniata;Vertebrata;Gnathostomata;Teleostomi;Euteleostomi;Sarcopterygii;Tetrapoda;Amniota;Mammalia;Theria;Eutheria;Euarchontoglires;Primates;Haplorrhini;Simiiformes;Catarrhini;Hominoidea;Hominidae;Homininae;Homo;Homo sapiens	32	4e-08	1	cellular organisms;Bacteria;Proteobacteria;Alphaproteobacteria;Rhodospirillales;Rhodospirillaceae;Rhodospirillum;Rhodospirillum centenum;Rhodospirillum centenum SW	32	9e-06	ERR006249.sra.4460030	ERR006249	ERX001086	SRS000633	SRP000547	ERA000125	1000 Genomes CEPH (Utah residents with ancestry from Northern and Western Europe) population sequencing	NA12748	NA12748.19	1000G-mpimg-090219-1	CEU	2009-10-06	26155548	726543	WGS	low coverage	no	ILLUMINA	data/NA12748/sequence_read/ERR006249.filt.fastq.gz	MPIMG	PAIRED	Solexa 1G Genome Analyzer	GENOMIC	150
cellular organisms;Eukaryota;Opisthokonta;Metazoa;Eumetazoa;Bilateria;Coelomata;Deuterostomia;Chordata;Craniata;Vertebrata;Gnathostomata;Teleostomi;Euteleostomi;Sarcopterygii;Tetrapoda;Amniota;Mammalia;Theria;Eutheria;Euarchontoglires;Primates;Haplorrhini;Simiiformes;Catarrhini;Hominoidea;Hominidae;Homininae;Homo;Homo sapiens	36	2e-10	1	cellular organisms;Bacteria;Proteobacteria;Gammaproteobacteria;Enterobacteriales;Enterobacteriaceae;Dickeya;Dickeya dadantii;Dickeya dadantii 3937	32	4e-08	ERR006402.sra.7528553	ERR006402	ERX001151	SRS000637	SRP000547	ERA000146	1000 Genomes CEPH (Utah residents with ancestry from Northern and Western Europe) population sequencing	NA12827	NA12827.20	1000G-mpimg-090430-12	CEU	2009-10-06	27377604	760489	WGS	low coverage	no	ILLUMINA	data/NA12827/sequence_read/ERR006402.filt.fastq.gz	MPIMG	PAIRED	Solexa 1G Genome Analyzer	GENOMIC	188
cellular organisms;Eukaryota;Opisthokonta;Metazoa;Eumetazoa;Bilateria;Coelomata;Deuterostomia;Chordata;Craniata;Vertebrata;Gnathostomata;Teleostomi;Euteleostomi;Sarcopterygii;Tetrapoda;Amniota;Mammalia;Theria;Eutheria;Euarchontoglires;Primates;Haplorrhini;Simiiformes;Catarrhini;Hominoidea;Hominidae;Homininae;Homo;Homo sapiens	51	3e-19	2	cellular organisms;Bacteria;Proteobacteria;Gammaproteobacteria;Enterobacteriales;Enterobacteriaceae;Serratia;Serratia proteamaculans;Serratia proteamaculans 568	51	5e-12	ERR006347.sra.6092673	ERR006347	ERX001127	SRS000639	SRP000547	ERA000138	1000 Genomes CEPH (Utah residents with ancestry from Northern and Western Europe) population sequencing	NA12830	NA12830.22	1000G-mpimg-090515-4	CEU	2009-10-06	5770701	113151	WGS	low coverage	no	ILLUMINA	data/NA12830/sequence_read/ERR006347.filt.fastq.gz	MPIMG	PAIRED	Solexa 1G Genome Analyzer	GENOMIC	184
cellular organisms;Eukaryota;Opisthokonta;Metazoa;Eumetazoa;Bilateria;Coelomata;Deuterostomia;Chordata;Craniata;Vertebrata;Gnathostomata;Teleostomi;Euteleostomi;Sarcopterygii;Tetrapoda;Amniota;Mammalia;Theria;Eutheria;Euarchontoglires;Primates;Haplorrhini;Simiiformes;Catarrhini;Hominoidea;Hominidae;Homininae;Homo;Homo sapiens	51	3e-19	1	cellular organisms;Bacteria;Proteobacteria;Betaproteobacteria;Burkholderiales;Burkholderiaceae;Cupriavidus;Cupriavidus necator;Ralstonia eutropha H16	51	5e-12	ERR006355.sra.9007868	ERR006355	ERX001132	SRS000639	SRP000547	ERA000139	1000 Genomes CEPH (Utah residents with ancestry from Northern and Western Europe) population sequencing	NA12830	NA12830.22	1000G-mpimg-090522-4	CEU	2009-10-15	66968202	1313102	WGS	low coverage	no	ILLUMINA	data/NA12830/sequence_read/ERR006355.filt.fastq.gz	MPIMG	PAIRED	Solexa 1G Genome Analyzer	GENOMIC	164
cellular organisms;Eukaryota;Opisthokonta;Metazoa;Eumetazoa;Bilateria;Coelomata;Deuterostomia;Chordata;Craniata;Vertebrata;Gnathostomata;Teleostomi;Euteleostomi;Sarcopterygii;Tetrapoda;Amniota;Mammalia;Theria;Eutheria;Euarchontoglires;Primates;Haplorrhini;Simiiformes;Catarrhini;Hominoidea;Hominidae;Homininae;Homo;Homo sapiens	51	3e-19	1	cellular organisms;Bacteria;Proteobacteria	47	5e-12	ERR006366.sra.8748002	ERR006366	ERX001138	SRS000639	SRP000547	ERA000141	1000 Genomes CEPH (Utah residents with ancestry from Northern and Western Europe) population sequencing	NA12830	NA12830.22	1000G-mpimg-090608-1	CEU	2009-10-06	58676877	1150527	WGS	low coverage	no	ILLUMINA	data/NA12830/sequence_read/ERR006366.filt.fastq.gz	MPIMG	PAIRED	Solexa 1G Genome Analyzer	GENOMIC	145
cellular organisms;Eukaryota;Opisthokonta;Metazoa;Eumetazoa;Bilateria;Coelomata;Deuterostomia;Chordata;Craniata;Vertebrata;Gnathostomata;Teleostomi;Euteleostomi;Sarcopterygii;Tetrapoda;Amniota;Mammalia;Theria;Eutheria;Euarchontoglires;Primates;Haplorrhini;Simiiformes;Catarrhini;Hominoidea;Hominidae;Homininae;Homo;Homo sapiens	51	3e-19	1	cellular organisms;Bacteria;Proteobacteria;Gammaproteobacteria;Enterobacteriales;Enterobacteriaceae;Edwardsiella;Edwardsiella ictaluri;Edwardsiella ictaluri 93-146	51	2e-14	ERR006347.sra.8779019	ERR006347	ERX001127	SRS000639	SRP000547	ERA000138	1000 Genomes CEPH (Utah residents with ancestry from Northern and Western Europe) population sequencing	NA12830	NA12830.22	1000G-mpimg-090515-4	CEU	2009-10-06	5770701	113151	WGS	low coverage	no	ILLUMINA	data/NA12830/sequence_read/ERR006347.filt.fastq.gz	MPIMG	PAIRED	Solexa 1G Genome Analyzer	GENOMIC	184
cellular organisms;Eukaryota;Opisthokonta;Metazoa;Eumetazoa;Bilateria;Coelomata;Deuterostomia;Chordata;Craniata;Vertebrata;Gnathostomata;Teleostomi;Euteleostomi;Sarcopterygii;Tetrapoda;Amniota;Mammalia;Theria;Eutheria;Euarchontoglires;Primates;Haplorrhini;Simiiformes;Catarrhini;Hominoidea;Hominidae;Homininae;Homo;Homo sapiens	51	3e-19	1	cellular organisms;Bacteria;Proteobacteria;Gammaproteobacteria;Enterobacteriales;Enterobacteriaceae;Serratia;Serratia marcescens	51	3e-19	ERR006355.sra.585932	ERR006355	ERX001132	SRS000639	SRP000547	ERA000139	1000 Genomes CEPH (Utah residents with ancestry from Northern and Western Europe) population sequencing	NA12830	NA12830.22	1000G-mpimg-090522-4	CEU	2009-10-15	66968202	1313102	WGS	low coverage	no	ILLUMINA	data/NA12830/sequence_read/ERR006355.filt.fastq.gz	MPIMG	PAIRED	Solexa 1G Genome Analyzer	GENOMIC	164
cellular organisms;Eukaryota;Opisthokonta;Metazoa;Eumetazoa;Bilateria;Coelomata;Deuterostomia;Chordata;Craniata;Vertebrata;Gnathostomata;Teleostomi;Euteleostomi;Sarcopterygii;Tetrapoda;Amniota;Mammalia;Theria;Eutheria;Euarchontoglires;Primates;Haplorrhini;Simiiformes;Catarrhini;Hominoidea;Hominidae;Homininae;Homo;Homo sapiens	35	6e-10	1	cellular organisms;Bacteria;Proteobacteria;Gammaproteobacteria;Pseudomonadales;Pseudomonadaceae;Pseudomonas;Pseudomonas stutzeri group;Pseudomonas stutzeri subgroup;Pseudomonas stutzeri	36	9e-06	ERR006325.sra.7855289	ERR006325	ERX001120	SRS000639	SRP000547	ERA000134	1000 Genomes CEPH (Utah residents with ancestry from Northern and Western Europe) population sequencing	NA12830	NA12830.22	1000G-mpimg-090413-5	CEU	2009-10-06	267333012	7425917	WGS	low coverage	no	ILLUMINA	data/NA12830/sequence_read/ERR006325.filt.fastq.gz	MPIMG	PAIRED	Solexa 1G Genome Analyzer	GENOMIC	146
cellular organisms;Eukaryota;Opisthokonta;Metazoa;Eumetazoa;Bilateria;Coelomata;Deuterostomia;Chordata;Craniata;Vertebrata;Gnathostomata;Teleostomi;Euteleostomi;Sarcopterygii;Tetrapoda;Amniota;Mammalia;Theria;Eutheria;Euarchontoglires;Primates;Haplorrhini;Simiiformes;Catarrhini;Hominoidea;Hominidae;Homininae;Homo;Homo sapiens	51	3e-19	1	cellular organisms;Bacteria;Proteobacteria;Gammaproteobacteria;Enterobacteriales;Enterobacteriaceae;Serratia;Serratia proteamaculans;Serratia proteamaculans 568	47	5e-12	ERR006356.sra.926701	ERR006356	ERX001132	SRS000639	SRP000547	ERA000139	1000 Genomes CEPH (Utah residents with ancestry from Northern and Western Europe) population sequencing	NA12830	NA12830.22	1000G-mpimg-090522-5	CEU	2009-10-15	32761380	642380	WGS	low coverage	no	ILLUMINA	data/NA12830/sequence_read/ERR006356.filt.fastq.gz	MPIMG	PAIRED	Solexa 1G Genome Analyzer	GENOMIC	164
cellular organisms;Eukaryota;Opisthokonta;Metazoa;Eumetazoa;Bilateria;Coelomata;Deuterostomia;Chordata;Craniata;Vertebrata;Gnathostomata;Teleostomi;Euteleostomi;Sarcopterygii;Tetrapoda;Amniota;Mammalia;Theria;Eutheria;Euarchontoglires;Primates;Haplorrhini;Simiiformes;Catarrhini;Hominoidea;Hominidae;Homininae;Homo;Homo sapiens	51	3e-19	3	cellular organisms;Bacteria;Actinobacteria;Actinobacteria;Actinobacteridae;Actinomycetales;Propionibacterineae;Propionibacteriaceae;Propionibacterium;Propionibacterium acnes	51	3e-19	ERR006355.sra.861475	ERR006355	ERX001132	SRS000639	SRP000547	ERA000139	1000 Genomes CEPH (Utah residents with ancestry from Northern and Western Europe) population sequencing	NA12830	NA12830.22	1000G-mpimg-090522-4	CEU	2009-10-15	66968202	1313102	WGS	low coverage	no	ILLUMINA	data/NA12830/sequence_read/ERR006355.filt.fastq.gz	MPIMG	PAIRED	Solexa 1G Genome Analyzer	GENOMIC	164
cellular organisms;Eukaryota;Opisthokonta;Metazoa;Eumetazoa;Bilateria;Coelomata;Deuterostomia;Chordata;Craniata;Vertebrata;Gnathostomata;Teleostomi;Euteleostomi;Sarcopterygii;Tetrapoda;Amniota;Mammalia;Theria;Eutheria;Euarchontoglires;Primates;Haplorrhini;Simiiformes;Catarrhini;Hominoidea;Hominidae;Homininae;Homo;Homo sapiens	51	3e-19	1	cellular organisms;Bacteria;Proteobacteria;Gammaproteobacteria;Xanthomonadales;Xanthomonadaceae;Stenotrophomonas;Stenotrophomonas maltophilia group;Stenotrophomonas maltophilia	51	8e-17	ERR006347.sra.9612190	ERR006347	ERX001127	SRS000639	SRP000547	ERA000138	1000 Genomes CEPH (Utah residents with ancestry from Northern and Western Europe) population sequencing	NA12830	NA12830.22	1000G-mpimg-090515-4	CEU	2009-10-06	5770701	113151	WGS	low coverage	no	ILLUMINA	data/NA12830/sequence_read/ERR006347.filt.fastq.gz	MPIMG	PAIRED	Solexa 1G Genome Analyzer	GENOMIC	184
cellular organisms;Eukaryota;Opisthokonta;Metazoa;Eumetazoa;Bilateria;Coelomata;Deuterostomia;Chordata;Craniata;Vertebrata;Gnathostomata;Teleostomi;Euteleostomi;Sarcopterygii;Tetrapoda;Amniota;Mammalia;Theria;Eutheria;Euarchontoglires;Primates;Haplorrhini;Simiiformes;Catarrhini;Hominoidea;Hominidae;Homininae;Homo;Homo sapiens	51	3e-19	2	cellular organisms;Bacteria;Proteobacteria;Gammaproteobacteria;Xanthomonadales;Xanthomonadaceae;Stenotrophomonas;Stenotrophomonas maltophilia group;Stenotrophomonas maltophilia	45	1e-15	ERR006347.sra.8947373	ERR006347	ERX001127	SRS000639	SRP000547	ERA000138	1000 Genomes CEPH (Utah residents with ancestry from Northern and Western Europe) population sequencing	NA12830	NA12830.22	1000G-mpimg-090515-4	CEU	2009-10-06	5770701	113151	WGS	low coverage	no	ILLUMINA	data/NA12830/sequence_read/ERR006347.filt.fastq.gz	MPIMG	PAIRED	Solexa 1G Genome Analyzer	GENOMIC	184
cellular organisms;Eukaryota;Opisthokonta;Metazoa;Eumetazoa;Bilateria;Coelomata;Deuterostomia;Chordata;Craniata;Vertebrata;Gnathostomata;Teleostomi;Euteleostomi;Sarcopterygii;Tetrapoda;Amniota;Mammalia;Theria;Eutheria;Euarchontoglires;Primates;Haplorrhini;Simiiformes;Catarrhini;Hominoidea;Hominidae;Homininae;Homo;Homo sapiens	51	3e-19	1	cellular organisms;Bacteria;Proteobacteria;Gammaproteobacteria;Xanthomonadales;Xanthomonadaceae;Stenotrophomonas;Stenotrophomonas maltophilia group;Stenotrophomonas maltophilia;Stenotrophomonas maltophilia K279a	51	2e-14	ERR006347.sra.4587180	ERR006347	ERX001127	SRS000639	SRP000547	ERA000138	1000 Genomes CEPH (Utah residents with ancestry from Northern and Western Europe) population sequencing	NA12830	NA12830.22	1000G-mpimg-090515-4	CEU	2009-10-06	5770701	113151	WGS	low coverage	no	ILLUMINA	data/NA12830/sequence_read/ERR006347.filt.fastq.gz	MPIMG	PAIRED	Solexa 1G Genome Analyzer	GENOMIC	184
cellular organisms;Eukaryota;Opisthokonta;Metazoa;Eumetazoa;Bilateria;Coelomata;Deuterostomia;Chordata;Craniata;Vertebrata;Gnathostomata;Teleostomi;Euteleostomi;Sarcopterygii;Tetrapoda;Amniota;Mammalia;Theria;Eutheria;Euarchontoglires;Primates;Haplorrhini;Simiiformes;Catarrhini;Hominoidea;Hominidae;Homininae;Homo;Homo sapiens	36	2e-10	1	cellular organisms;Bacteria;Proteobacteria;Gammaproteobacteria;Pseudomonadales;Pseudomonadaceae;Pseudomonas;Pseudomonas aeruginosa group;Pseudomonas mendocina;Pseudomonas mendocina ymp	33	2e-06	ERR006266.sra.622393	ERR006266	ERX001095	SRS000641	SRP000547	ERA000127	1000 Genomes CEPH (Utah residents with ancestry from Northern and Western Europe) population sequencing	NA12843	NA12843.24	1000G-mpimg-090224-2	CEU	2009-10-06	23094324	641509	WGS	low coverage	no	ILLUMINA	data/NA12843/sequence_read/ERR006266.filt.fastq.gz	MPIMG	PAIRED	Solexa 1G Genome Analyzer	GENOMIC	167
cellular organisms;Eukaryota;Opisthokonta;Metazoa;Eumetazoa;Bilateria;Coelomata;Deuterostomia;Chordata;Craniata;Vertebrata;Gnathostomata;Teleostomi;Euteleostomi;Sarcopterygii;Tetrapoda;Amniota;Mammalia;Theria;Eutheria;Euarchontoglires;Primates;Haplorrhini;Simiiformes;Catarrhini;Hominoidea;Hominidae;Homininae;Homo;Homo sapiens	51	3e-19	1	cellular organisms;Bacteria;Proteobacteria;Gammaproteobacteria;Xanthomonadales;Xanthomonadaceae;Stenotrophomonas;Stenotrophomonas maltophilia group;Stenotrophomonas maltophilia	51	2e-14	ERR006345.sra.8497145	ERR006345	ERX001127	SRS000639	SRP000547	ERA000138	1000 Genomes CEPH (Utah residents with ancestry from Northern and Western Europe) population sequencing	NA12830	NA12830.22	1000G-mpimg-090515-1	CEU	2009-10-06	20819118	408218	WGS	low coverage	no	ILLUMINA	data/NA12830/sequence_read/ERR006345.filt.fastq.gz	MPIMG	PAIRED	Solexa 1G Genome Analyzer	GENOMIC	184
cellular organisms;Eukaryota;Opisthokonta;Metazoa;Eumetazoa;Bilateria;Coelomata;Deuterostomia;Chordata;Craniata;Vertebrata;Gnathostomata;Teleostomi;Euteleostomi;Sarcopterygii;Tetrapoda;Amniota;Mammalia;Theria;Eutheria;Euarchontoglires;Primates;Haplorrhini;Simiiformes;Catarrhini;Hominoidea;Hominidae;Homininae;Homo;Homo sapiens	51	3e-19	1	cellular organisms;Bacteria;Proteobacteria;Gammaproteobacteria;Enterobacteriales;Enterobacteriaceae;Citrobacter;Citrobacter rodentium;Citrobacter rodentium ICC168	51	1e-09	ERR006347.sra.3167723	ERR006347	ERX001127	SRS000639	SRP000547	ERA000138	1000 Genomes CEPH (Utah residents with ancestry from Northern and Western Europe) population sequencing	NA12830	NA12830.22	1000G-mpimg-090515-4	CEU	2009-10-06	5770701	113151	WGS	low coverage	no	ILLUMINA	data/NA12830/sequence_read/ERR006347.filt.fastq.gz	MPIMG	PAIRED	Solexa 1G Genome Analyzer	GENOMIC	184
cellular organisms;Eukaryota;Opisthokonta;Metazoa;Eumetazoa;Bilateria;Coelomata;Deuterostomia;Chordata;Craniata;Vertebrata;Gnathostomata;Teleostomi;Euteleostomi;Sarcopterygii;Tetrapoda;Amniota;Mammalia;Theria;Eutheria;Euarchontoglires;Primates;Haplorrhini;Simiiformes;Catarrhini;Hominoidea;Hominidae;Homininae;Homo;Homo sapiens	36	2e-10	1	cellular organisms;Bacteria;Proteobacteria;Gammaproteobacteria;Enterobacteriales;Enterobacteriaceae	36	2e-10	ERR000995.sra.2588859	ERR000995	ERX000125	SRS000066	SRP000031	ERA000024	1000Genomes Project Pilot 1	NA12156	g1k-sc-NA12156-CEU-1	IL27_926_3	CEU	2008-08-12	29596411	799903	WGS	low coverage	no	ILLUMINA	data/NA12156/sequence_read/ERR000995.filt.fastq.gz	SC	PAIRED	Solexa 1G Genome Analyzer	GENOMIC	175
cellular organisms;Eukaryota;Opisthokonta;Metazoa;Eumetazoa;Bilateria;Coelomata;Deuterostomia;Chordata;Craniata;Vertebrata;Gnathostomata;Teleostomi;Euteleostomi;Sarcopterygii;Tetrapoda;Amniota;Mammalia;Theria;Eutheria;Euarchontoglires;Primates;Haplorrhini;Simiiformes;Catarrhini;Hominoidea;Hominidae;Homininae;Homo;Homo sapiens	48	2e-17	1	cellular organisms;Bacteria;Actinobacteria;Actinobacteria;Actinobacteridae;Actinomycetales;Propionibacterineae;Propionibacteriaceae;Propionibacterium;Propionibacterium acnes	51	3e-19	ERR006345.sra.6280869	ERR006345	ERX001127	SRS000639	SRP000547	ERA000138	1000 Genomes CEPH (Utah residents with ancestry from Northern and Western Europe) population sequencing	NA12830	NA12830.22	1000G-mpimg-090515-1	CEU	2009-10-06	20819118	408218	WGS	low coverage	no	ILLUMINA	data/NA12830/sequence_read/ERR006345.filt.fastq.gz	MPIMG	PAIRED	Solexa 1G Genome Analyzer	GENOMIC	184
cellular organisms;Eukaryota;Opisthokonta;Metazoa;Eumetazoa;Bilateria;Coelomata;Deuterostomia;Chordata;Craniata;Vertebrata;Gnathostomata;Teleostomi;Euteleostomi;Sarcopterygii;Tetrapoda;Amniota;Mammalia;Theria;Eutheria;Euarchontoglires;Primates;Haplorrhini;Simiiformes;Catarrhini;Hominoidea;Hominidae;Homininae;Homo;Homo sapiens	51	8e-17	3	cellular organisms;Bacteria;Actinobacteria;Actinobacteria;Actinobacteridae;Actinomycetales;Propionibacterineae;Propionibacteriaceae;Propionibacterium;Propionibacterium acnes	51	3e-19	ERR006355.sra.12811020	ERR006355	ERX001132	SRS000639	SRP000547	ERA000139	1000 Genomes CEPH (Utah residents with ancestry from Northern and Western Europe) population sequencing	NA12830	NA12830.22	1000G-mpimg-090522-4	CEU	2009-10-15	66968202	1313102	WGS	low coverage	no	ILLUMINA	data/NA12830/sequence_read/ERR006355.filt.fastq.gz	MPIMG	PAIRED	Solexa 1G Genome Analyzer	GENOMIC	164
cellular organisms;Eukaryota;Opisthokonta;Metazoa;Eumetazoa;Bilateria;Coelomata;Deuterostomia;Chordata;Craniata;Vertebrata;Gnathostomata;Teleostomi;Euteleostomi;Sarcopterygii;Tetrapoda;Amniota;Mammalia;Theria;Eutheria;Euarchontoglires;Primates;Haplorrhini;Simiiformes;Catarrhini;Hominoidea;Hominidae;Homininae;Homo;Homo sapiens	51	3e-19	1	cellular organisms;Bacteria;Proteobacteria;Gammaproteobacteria;Enterobacteriales;Enterobacteriaceae;Serratia	47	8e-17	ERR006347.sra.2825190	ERR006347	ERX001127	SRS000639	SRP000547	ERA000138	1000 Genomes CEPH (Utah residents with ancestry from Northern and Western Europe) population sequencing	NA12830	NA12830.22	1000G-mpimg-090515-4	CEU	2009-10-06	5770701	113151	WGS	low coverage	no	ILLUMINA	data/NA12830/sequence_read/ERR006347.filt.fastq.gz	MPIMG	PAIRED	Solexa 1G Genome Analyzer	GENOMIC	184
cellular organisms;Eukaryota;Opisthokonta;Metazoa;Eumetazoa;Bilateria;Coelomata;Deuterostomia;Chordata;Craniata;Vertebrata;Gnathostomata;Teleostomi;Euteleostomi;Sarcopterygii;Tetrapoda;Amniota;Mammalia;Theria;Eutheria;Euarchontoglires;Primates;Haplorrhini;Simiiformes;Catarrhini;Hominoidea;Hominidae;Homininae;Homo;Homo sapiens	51	8e-17	1	cellular organisms;Bacteria;Proteobacteria;Gammaproteobacteria;Enterobacteriales;Enterobacteriaceae	51	8e-17	ERR006347.sra.4958117	ERR006347	ERX001127	SRS000639	SRP000547	ERA000138	1000 Genomes CEPH (Utah residents with ancestry from Northern and Western Europe) population sequencing	NA12830	NA12830.22	1000G-mpimg-090515-4	CEU	2009-10-06	5770701	113151	WGS	low coverage	no	ILLUMINA	data/NA12830/sequence_read/ERR006347.filt.fastq.gz	MPIMG	PAIRED	Solexa 1G Genome Analyzer	GENOMIC	184
cellular organisms;Eukaryota;Opisthokonta;Metazoa;Eumetazoa;Bilateria;Coelomata;Deuterostomia;Chordata;Craniata;Vertebrata;Gnathostomata;Teleostomi;Euteleostomi;Sarcopterygii;Tetrapoda;Amniota;Mammalia;Theria;Eutheria;Euarchontoglires;Primates;Haplorrhini;Simiiformes;Catarrhini;Hominoidea;Hominidae;Homininae;Homo;Homo sapiens	51	3e-19	3	cellular organisms;Bacteria;Proteobacteria;Gammaproteobacteria;Enterobacteriales;Enterobacteriaceae;Serratia	51	5e-12	ERR006347.sra.5653952	ERR006347	ERX001127	SRS000639	SRP000547	ERA000138	1000 Genomes CEPH (Utah residents with ancestry from Northern and Western Europe) population sequencing	NA12830	NA12830.22	1000G-mpimg-090515-4	CEU	2009-10-06	5770701	113151	WGS	low coverage	no	ILLUMINA	data/NA12830/sequence_read/ERR006347.filt.fastq.gz	MPIMG	PAIRED	Solexa 1G Genome Analyzer	GENOMIC	184
cellular organisms;Eukaryota;Opisthokonta;Metazoa;Eumetazoa;Bilateria;Coelomata;Deuterostomia;Chordata;Craniata;Vertebrata;Gnathostomata;Teleostomi;Euteleostomi;Sarcopterygii;Tetrapoda;Amniota;Mammalia;Theria;Eutheria;Euarchontoglires;Primates;Haplorrhini;Simiiformes;Catarrhini;Hominoidea;Hominidae;Homininae;Homo;Homo sapiens	51	3e-19	1	cellular organisms;Bacteria;Actinobacteria;Actinobacteria;Actinobacteridae;Actinomycetales;Propionibacterineae;Propionibacteriaceae;Propionibacterium;Propionibacterium acnes	51	3e-19	ERR006345.sra.1773854	ERR006345	ERX001127	SRS000639	SRP000547	ERA000138	1000 Genomes CEPH (Utah residents with ancestry from Northern and Western Europe) population sequencing	NA12830	NA12830.22	1000G-mpimg-090515-1	CEU	2009-10-06	20819118	408218	WGS	low coverage	no	ILLUMINA	data/NA12830/sequence_read/ERR006345.filt.fastq.gz	MPIMG	PAIRED	Solexa 1G Genome Analyzer	GENOMIC	184
cellular organisms;Eukaryota;Opisthokonta;Metazoa;Eumetazoa;Bilateria;Coelomata;Deuterostomia;Chordata;Craniata;Vertebrata;Gnathostomata;Teleostomi;Euteleostomi;Sarcopterygii;Tetrapoda;Amniota;Mammalia;Theria;Eutheria;Euarchontoglires;Primates;Haplorrhini;Simiiformes;Catarrhini;Hominoidea	51	3e-19	1	cellular organisms;Bacteria;Proteobacteria;Gammaproteobacteria;Xanthomonadales;Xanthomonadaceae;Stenotrophomonas;Stenotrophomonas maltophilia group;Stenotrophomonas maltophilia;Stenotrophomonas maltophilia K279a	51	5e-12	ERR006347.sra.6596788	ERR006347	ERX001127	SRS000639	SRP000547	ERA000138	1000 Genomes CEPH (Utah residents with ancestry from Northern and Western Europe) population sequencing	NA12830	NA12830.22	1000G-mpimg-090515-4	CEU	2009-10-06	5770701	113151	WGS	low coverage	no	ILLUMINA	data/NA12830/sequence_read/ERR006347.filt.fastq.gz	MPIMG	PAIRED	Solexa 1G Genome Analyzer	GENOMIC	184
cellular organisms;Eukaryota;Opisthokonta;Metazoa;Eumetazoa;Bilateria;Coelomata;Deuterostomia;Chordata;Craniata;Vertebrata;Gnathostomata;Teleostomi;Euteleostomi;Sarcopterygii;Tetrapoda;Amniota;Mammalia;Theria;Eutheria;Euarchontoglires;Primates;Haplorrhini;Simiiformes;Catarrhini;Hominoidea;Hominidae;Homininae;Homo;Homo sapiens	29	2e-06	1	cellular organisms;Bacteria;Proteobacteria;Gammaproteobacteria;Pseudomonadales;Pseudomonadaceae;Pseudomonas;Pseudomonas aeruginosa group;Pseudomonas mendocina;Pseudomonas mendocina ymp	36	9e-06	ERR002474.sra.3567559	ERR002474	ERX000186	SRS000071	SRP000031	ERA000072	1000Genomes Project Pilot 1	NA12489	g1k-sc-NA12489-CEU-1	IL10_649_8	CEU	2008-12-15	689976	19166	WGS	low coverage	no	ILLUMINA	data/NA12489/sequence_read/ERR002474.filt.fastq.gz	SC	PAIRED	Solexa 1G Genome Analyzer	GENOMIC	175
cellular organisms;Eukaryota;Opisthokonta;Metazoa;Eumetazoa;Bilateria;Coelomata;Deuterostomia;Chordata;Craniata;Vertebrata;Gnathostomata;Teleostomi;Euteleostomi;Sarcopterygii;Tetrapoda;Amniota;Mammalia;Theria;Eutheria;Euarchontoglires;Primates;Haplorrhini;Simiiformes;Catarrhini;Hominoidea;Hominidae;Homininae;Homo;Homo sapiens	49	5e-18	2	cellular organisms;Bacteria;Proteobacteria;Gammaproteobacteria;Xanthomonadales;Xanthomonadaceae;Stenotrophomonas;Stenotrophomonas maltophilia group;Stenotrophomonas maltophilia;Stenotrophomonas maltophilia K279a	48	1e-12	ERR006354.sra.3061290	ERR006354	ERX001132	SRS000639	SRP000547	ERA000139	1000 Genomes CEPH (Utah residents with ancestry from Northern and Western Europe) population sequencing	NA12830	NA12830.22	1000G-mpimg-090522-3	CEU	2009-10-15	41581728	815328	WGS	low coverage	no	ILLUMINA	data/NA12830/sequence_read/ERR006354.filt.fastq.gz	MPIMG	PAIRED	Solexa 1G Genome Analyzer	GENOMIC	164
cellular organisms;Eukaryota;Opisthokonta;Metazoa;Eumetazoa;Bilateria;Coelomata;Deuterostomia;Chordata;Craniata;Vertebrata;Gnathostomata;Teleostomi;Euteleostomi;Sarcopterygii;Tetrapoda;Amniota;Mammalia;Theria;Eutheria;Euarchontoglires;Primates;Haplorrhini;Simiiformes;Catarrhini;Hominoidea;Hominidae;Homininae;Homo;Homo sapiens	51	3e-19	1	cellular organisms;Bacteria;Proteobacteria;Gammaproteobacteria;Enterobacteriales;Enterobacteriaceae;Edwardsiella;Edwardsiella tarda	43	5e-12	ERR006394.sra.3430533	ERR006394	ERX001148	SRS000639	SRP000547	ERA000145	1000 Genomes CEPH (Utah residents with ancestry from Northern and Western Europe) population sequencing	NA12830	NA12830.22	1000G-mpimg-090703-4	CEU	2009-10-06	84837582	1663482	WGS	low coverage	no	ILLUMINA	data/NA12830/sequence_read/ERR006394.filt.fastq.gz	MPIMG	PAIRED	Solexa 1G Genome Analyzer	GENOMIC	147
cellular organisms;Eukaryota;Opisthokonta;Metazoa;Eumetazoa;Bilateria;Coelomata;Deuterostomia;Chordata;Craniata;Vertebrata;Gnathostomata;Teleostomi;Euteleostomi;Sarcopterygii;Tetrapoda;Amniota;Mammalia;Theria;Eutheria;Euarchontoglires;Primates;Haplorrhini;Simiiformes;Catarrhini;Hominoidea;Hominidae;Homininae;Homo;Homo sapiens	36	2e-10	1	cellular organisms;Bacteria;Proteobacteria;Gammaproteobacteria;Enterobacteriales;Enterobacteriaceae;Dickeya;Dickeya zeae;Dickeya zeae Ech1591	36	4e-08	ERR005843.sra.9416058	ERR005843	ERX000722	SRS000619	SRP000547	ERA000109	1000 Genomes CEPH (Utah residents with ancestry from Northern and Western Europe) population sequencing	NA12282	NA12282.16	1000G-mpimg-090115-3	CEU	2009-09-04	9184176	255116	WGS	low coverage	no	ILLUMINA	data/NA12282/sequence_read/ERR005843.filt.fastq.gz	MPIMG	PAIRED	Solexa 1G Genome Analyzer	GENOMIC	172
cellular organisms;Eukaryota;Opisthokonta;Metazoa;Eumetazoa;Bilateria;Coelomata;Deuterostomia;Chordata;Craniata;Vertebrata;Gnathostomata;Teleostomi;Euteleostomi;Sarcopterygii;Tetrapoda;Amniota;Mammalia;Theria;Eutheria;Euarchontoglires;Primates;Haplorrhini;Simiiformes;Catarrhini;Hominoidea;Hominidae;Homininae;Homo;Homo sapiens	51	3e-19	2	cellular organisms;Bacteria;Proteobacteria;Gammaproteobacteria;Enterobacteriales;Enterobacteriaceae;Dickeya;Dickeya dadantii;Dickeya dadantii 3937	43	2e-14	ERR006347.sra.3459996	ERR006347	ERX001127	SRS000639	SRP000547	ERA000138	1000 Genomes CEPH (Utah residents with ancestry from Northern and Western Europe) population sequencing	NA12830	NA12830.22	1000G-mpimg-090515-4	CEU	2009-10-06	5770701	113151	WGS	low coverage	no	ILLUMINA	data/NA12830/sequence_read/ERR006347.filt.fastq.gz	MPIMG	PAIRED	Solexa 1G Genome Analyzer	GENOMIC	184
cellular organisms;Eukaryota;Opisthokonta;Metazoa;Eumetazoa;Bilateria;Coelomata;Deuterostomia;Chordata;Craniata;Vertebrata;Gnathostomata;Teleostomi;Euteleostomi;Sarcopterygii;Tetrapoda;Amniota;Mammalia;Theria;Eutheria;Euarchontoglires;Primates;Haplorrhini;Simiiformes;Catarrhini;Hominoidea;Hominidae;Homininae;Homo;Homo sapiens	50	1e-18	1	cellular organisms;Bacteria;Proteobacteria;Gammaproteobacteria;Xanthomonadales;Xanthomonadaceae;Stenotrophomonas;Stenotrophomonas maltophilia group;Stenotrophomonas maltophilia	48	2e-17	ERR006343.sra.3512563	ERR006343	ERX001125	SRS000639	SRP000547	ERA000137	1000 Genomes CEPH (Utah residents with ancestry from Northern and Western Europe) population sequencing	NA12830	NA12830.22_2-3	1000G-mpimg-090508-3	CEU	2009-10-06	95492553	1872403	WGS	low coverage	no	ILLUMINA	data/NA12830/sequence_read/ERR006343.filt.fastq.gz	MPIMG	PAIRED	Solexa 1G Genome Analyzer	GENOMIC	159
cellular organisms;Eukaryota;Opisthokonta;Metazoa;Eumetazoa;Bilateria;Coelomata;Deuterostomia;Chordata;Craniata;Vertebrata;Gnathostomata;Teleostomi;Euteleostomi;Sarcopterygii;Tetrapoda;Amniota;Mammalia;Theria;Eutheria;Euarchontoglires;Primates;Haplorrhini;Simiiformes;Catarrhini;Hominoidea;Hominidae;Homininae;Homo;Homo sapiens	51	8e-17	1	cellular organisms;Bacteria;Proteobacteria;Gammaproteobacteria;Enterobacteriales;Enterobacteriaceae;Enterobacter;Enterobacter cloacae complex;Enterobacter cloacae;Enterobacter cloacae SCF1	51	8e-17	ERR006390.sra.11233220	ERR006390	ERX001146	SRS000640	SRP000547	ERA000144	1000 Genomes CEPH (Utah residents with ancestry from Northern and Western Europe) population sequencing	NA12842	NA12842.23	1000G-mpimg-090625-8	CEU	2009-10-06	100035786	1961486	WGS	low coverage	no	ILLUMINA	data/NA12842/sequence_read/ERR006390.filt.fastq.gz	MPIMG	PAIRED	Solexa 1G Genome Analyzer	GENOMIC	171
cellular organisms;Eukaryota;Opisthokonta;Metazoa;Eumetazoa;Bilateria;Coelomata;Deuterostomia;Chordata;Craniata;Vertebrata;Gnathostomata;Teleostomi;Euteleostomi;Sarcopterygii;Tetrapoda;Amniota;Mammalia;Theria;Eutheria;Euarchontoglires;Primates;Haplorrhini;Simiiformes;Catarrhini;Hominoidea;Hominidae;Homininae;Homo;Homo sapiens	51	3e-19	3	cellular organisms;Bacteria	48	2e-17	ERR006345.sra.9096231	ERR006345	ERX001127	SRS000639	SRP000547	ERA000138	1000 Genomes CEPH (Utah residents with ancestry from Northern and Western Europe) population sequencing	NA12830	NA12830.22	1000G-mpimg-090515-1	CEU	2009-10-06	20819118	408218	WGS	low coverage	no	ILLUMINA	data/NA12830/sequence_read/ERR006345.filt.fastq.gz	MPIMG	PAIRED	Solexa 1G Genome Analyzer	GENOMIC	184
cellular organisms;Eukaryota;Opisthokonta;Metazoa;Eumetazoa;Bilateria;Coelomata;Deuterostomia;Chordata;Craniata;Vertebrata;Gnathostomata;Teleostomi;Euteleostomi;Sarcopterygii;Tetrapoda;Amniota;Mammalia;Theria;Eutheria;Euarchontoglires;Primates;Haplorrhini;Simiiformes;Catarrhini;Hominoidea;Hominidae;Homininae;Homo;Homo sapiens	51	3e-19	1	cellular organisms;Bacteria;Proteobacteria;Gammaproteobacteria;Xanthomonadales;Xanthomonadaceae	51	2e-14	ERR006345.sra.2138645	ERR006345	ERX001127	SRS000639	SRP000547	ERA000138	1000 Genomes CEPH (Utah residents with ancestry from Northern and Western Europe) population sequencing	NA12830	NA12830.22	1000G-mpimg-090515-1	CEU	2009-10-06	20819118	408218	WGS	low coverage	no	ILLUMINA	data/NA12830/sequence_read/ERR006345.filt.fastq.gz	MPIMG	PAIRED	Solexa 1G Genome Analyzer	GENOMIC	184
cellular organisms;Eukaryota;Opisthokonta;Metazoa;Eumetazoa;Bilateria;Coelomata;Deuterostomia;Chordata;Craniata;Vertebrata;Gnathostomata;Teleostomi;Euteleostomi;Sarcopterygii;Tetrapoda;Amniota;Mammalia;Theria;Eutheria;Euarchontoglires;Primates;Haplorrhini;Simiiformes;Catarrhini;Hominoidea;Hominidae	51	3e-19	1	cellular organisms;Bacteria;Proteobacteria;Gammaproteobacteria;Enterobacteriales;Enterobacteriaceae;Serratia;Serratia proteamaculans;Serratia proteamaculans 568	50	3e-16	ERR006347.sra.5844264	ERR006347	ERX001127	SRS000639	SRP000547	ERA000138	1000 Genomes CEPH (Utah residents with ancestry from Northern and Western Europe) population sequencing	NA12830	NA12830.22	1000G-mpimg-090515-4	CEU	2009-10-06	5770701	113151	WGS	low coverage	no	ILLUMINA	data/NA12830/sequence_read/ERR006347.filt.fastq.gz	MPIMG	PAIRED	Solexa 1G Genome Analyzer	GENOMIC	184
cellular organisms;Eukaryota;Opisthokonta;Metazoa;Eumetazoa;Bilateria;Coelomata;Deuterostomia;Chordata;Craniata;Vertebrata;Gnathostomata;Teleostomi;Euteleostomi;Sarcopterygii;Tetrapoda;Amniota;Mammalia;Theria;Eutheria;Euarchontoglires;Primates;Haplorrhini;Simiiformes;Catarrhini;Hominoidea;Hominidae;Homininae;Homo;Homo sapiens	36	4e-08	1	cellular organisms;Bacteria;Proteobacteria;Alphaproteobacteria;Rhodobacterales;Rhodobacteraceae;Paracoccus;Paracoccus denitrificans;Paracoccus denitrificans PD1222	34	6e-07	ERR006324.sra.5420162	ERR006324	ERX001119	SRS000638	SRP000547	ERA000134	1000 Genomes CEPH (Utah residents with ancestry from Northern and Western Europe) population sequencing	NA12829	NA12829.21	1000G-mpimg-090413-4	CEU	2009-10-06	79584768	2210688	WGS	low coverage	no	ILLUMINA	data/NA12829/sequence_read/ERR006324.filt.fastq.gz	MPIMG	PAIRED	Solexa 1G Genome Analyzer	GENOMIC	169
cellular organisms;Eukaryota;Opisthokonta;Metazoa;Eumetazoa;Bilateria;Coelomata;Deuterostomia;Chordata;Craniata;Vertebrata;Gnathostomata;Teleostomi;Euteleostomi;Sarcopterygii;Tetrapoda;Amniota;Mammalia;Theria;Eutheria;Euarchontoglires;Primates;Haplorrhini;Simiiformes;Catarrhini;Hominoidea;Hominidae;Homininae;Homo;Homo sapiens	51	3e-19	1	cellular organisms;Bacteria;Proteobacteria;Gammaproteobacteria;Xanthomonadales;Xanthomonadaceae;Stenotrophomonas;Stenotrophomonas maltophilia group;Stenotrophomonas maltophilia;Stenotrophomonas maltophilia JV3	51	2e-14	ERR006345.sra.1575834	ERR006345	ERX001127	SRS000639	SRP000547	ERA000138	1000 Genomes CEPH (Utah residents with ancestry from Northern and Western Europe) population sequencing	NA12830	NA12830.22	1000G-mpimg-090515-1	CEU	2009-10-06	20819118	408218	WGS	low coverage	no	ILLUMINA	data/NA12830/sequence_read/ERR006345.filt.fastq.gz	MPIMG	PAIRED	Solexa 1G Genome Analyzer	GENOMIC	184
cellular organisms;Eukaryota;Opisthokonta;Metazoa;Eumetazoa;Bilateria;Coelomata;Deuterostomia;Chordata;Craniata;Vertebrata;Gnathostomata;Teleostomi;Euteleostomi;Sarcopterygii;Tetrapoda;Amniota;Mammalia;Theria;Eutheria;Euarchontoglires;Primates;Haplorrhini;Simiiformes;Catarrhini;Hominoidea;Hominidae;Homininae;Homo;Homo sapiens	51	8e-17	1	cellular organisms;Bacteria;Proteobacteria;Gammaproteobacteria;Enterobacteriales;Enterobacteriaceae;Serratia	50	3e-16	ERR006355.sra.3477583	ERR006355	ERX001132	SRS000639	SRP000547	ERA000139	1000 Genomes CEPH (Utah residents with ancestry from Northern and Western Europe) population sequencing	NA12830	NA12830.22	1000G-mpimg-090522-4	CEU	2009-10-15	66968202	1313102	WGS	low coverage	no	ILLUMINA	data/NA12830/sequence_read/ERR006355.filt.fastq.gz	MPIMG	PAIRED	Solexa 1G Genome Analyzer	GENOMIC	164
cellular organisms;Eukaryota;Opisthokonta;Metazoa;Eumetazoa;Bilateria;Coelomata;Deuterostomia;Chordata;Craniata;Vertebrata;Gnathostomata;Teleostomi;Euteleostomi;Sarcopterygii;Tetrapoda;Amniota;Mammalia;Theria;Eutheria;Euarchontoglires;Primates;Haplorrhini;Simiiformes;Catarrhini;Hominoidea;Hominidae;Homininae;Homo;Homo sapiens	51	3e-19	1	cellular organisms;Bacteria;Actinobacteria;Actinobacteria;Actinobacteridae;Actinomycetales;Propionibacterineae;Propionibacteriaceae;Propionibacterium;Propionibacterium acnes	51	3e-19	ERR006347.sra.264269	ERR006347	ERX001127	SRS000639	SRP000547	ERA000138	1000 Genomes CEPH (Utah residents with ancestry from Northern and Western Europe) population sequencing	NA12830	NA12830.22	1000G-mpimg-090515-4	CEU	2009-10-06	5770701	113151	WGS	low coverage	no	ILLUMINA	data/NA12830/sequence_read/ERR006347.filt.fastq.gz	MPIMG	PAIRED	Solexa 1G Genome Analyzer	GENOMIC	184
cellular organisms;Eukaryota;Opisthokonta;Metazoa;Eumetazoa;Bilateria;Coelomata;Deuterostomia;Chordata;Craniata;Vertebrata;Gnathostomata;Teleostomi;Euteleostomi;Sarcopterygii;Tetrapoda;Amniota;Mammalia;Theria;Eutheria;Euarchontoglires;Primates;Haplorrhini;Simiiformes;Catarrhini;Hominoidea;Hominidae;Homininae;Homo;Homo sapiens	51	3e-19	1	cellular organisms;Bacteria;Proteobacteria;Gammaproteobacteria;Enterobacteriales;Enterobacteriaceae;Pectobacterium;Pectobacterium wasabiae;Pectobacterium wasabiae WPP163	51	2e-14	ERR006347.sra.337869	ERR006347	ERX001127	SRS000639	SRP000547	ERA000138	1000 Genomes CEPH (Utah residents with ancestry from Northern and Western Europe) population sequencing	NA12830	NA12830.22	1000G-mpimg-090515-4	CEU	2009-10-06	5770701	113151	WGS	low coverage	no	ILLUMINA	data/NA12830/sequence_read/ERR006347.filt.fastq.gz	MPIMG	PAIRED	Solexa 1G Genome Analyzer	GENOMIC	184
cellular organisms;Eukaryota;Opisthokonta;Metazoa;Eumetazoa;Bilateria;Coelomata;Deuterostomia;Chordata;Craniata;Vertebrata;Gnathostomata;Teleostomi;Euteleostomi;Sarcopterygii;Tetrapoda;Amniota;Mammalia;Theria;Eutheria;Euarchontoglires;Primates;Haplorrhini;Simiiformes;Catarrhini;Hominoidea;Hominidae;Homininae;Homo;Homo sapiens	51	3e-19	1	cellular organisms;Bacteria;Proteobacteria;Betaproteobacteria;Burkholderiales;Burkholderiaceae;Burkholderia;Burkholderia cepacia complex;Burkholderia cenocepacia	51	3e-19	ERR006347.sra.10605125	ERR006347	ERX001127	SRS000639	SRP000547	ERA000138	1000 Genomes CEPH (Utah residents with ancestry from Northern and Western Europe) population sequencing	NA12830	NA12830.22	1000G-mpimg-090515-4	CEU	2009-10-06	5770701	113151	WGS	low coverage	no	ILLUMINA	data/NA12830/sequence_read/ERR006347.filt.fastq.gz	MPIMG	PAIRED	Solexa 1G Genome Analyzer	GENOMIC	184
cellular organisms;Eukaryota;Opisthokonta;Metazoa;Eumetazoa;Bilateria;Coelomata;Deuterostomia;Chordata;Craniata;Vertebrata;Gnathostomata;Teleostomi;Euteleostomi;Sarcopterygii;Tetrapoda;Amniota;Mammalia;Theria;Eutheria;Euarchontoglires;Primates;Haplorrhini;Simiiformes;Catarrhini;Hominoidea;Hominidae;Homininae;Homo;Homo sapiens	51	8e-17	1	cellular organisms;Bacteria;Proteobacteria;Gammaproteobacteria;Xanthomonadales;Xanthomonadaceae;Stenotrophomonas;Stenotrophomonas maltophilia group;Stenotrophomonas maltophilia;Stenotrophomonas maltophilia D457	51	3e-19	ERR006355.sra.88528	ERR006355	ERX001132	SRS000639	SRP000547	ERA000139	1000 Genomes CEPH (Utah residents with ancestry from Northern and Western Europe) population sequencing	NA12830	NA12830.22	1000G-mpimg-090522-4	CEU	2009-10-15	66968202	1313102	WGS	low coverage	no	ILLUMINA	data/NA12830/sequence_read/ERR006355.filt.fastq.gz	MPIMG	PAIRED	Solexa 1G Genome Analyzer	GENOMIC	164
cellular organisms;Eukaryota;Opisthokonta;Metazoa;Eumetazoa;Bilateria;Coelomata;Deuterostomia;Chordata;Craniata;Vertebrata;Gnathostomata;Teleostomi;Euteleostomi;Sarcopterygii;Tetrapoda;Amniota;Mammalia;Theria;Eutheria;Euarchontoglires;Primates;Haplorrhini;Simiiformes;Catarrhini;Hominoidea;Hominidae;Homininae;Homo;Homo sapiens	51	3e-19	1	cellular organisms;Bacteria;Proteobacteria;Gammaproteobacteria;Xanthomonadales;Xanthomonadaceae;Stenotrophomonas;Stenotrophomonas maltophilia group;Stenotrophomonas maltophilia	46	8e-14	ERR006347.sra.8981823	ERR006347	ERX001127	SRS000639	SRP000547	ERA000138	1000 Genomes CEPH (Utah residents with ancestry from Northern and Western Europe) population sequencing	NA12830	NA12830.22	1000G-mpimg-090515-4	CEU	2009-10-06	5770701	113151	WGS	low coverage	no	ILLUMINA	data/NA12830/sequence_read/ERR006347.filt.fastq.gz	MPIMG	PAIRED	Solexa 1G Genome Analyzer	GENOMIC	184
cellular organisms;Eukaryota;Opisthokonta;Metazoa;Eumetazoa;Bilateria;Coelomata;Deuterostomia;Chordata;Craniata;Vertebrata;Gnathostomata;Teleostomi;Euteleostomi;Sarcopterygii;Tetrapoda;Amniota;Mammalia;Theria;Eutheria;Euarchontoglires;Primates;Haplorrhini;Simiiformes;Catarrhini;Hominoidea;Hominidae;Homininae;Homo;Homo sapiens	51	3e-19	1	cellular organisms;Bacteria;Actinobacteria;Actinobacteria;Actinobacteridae;Actinomycetales;Propionibacterineae;Propionibacteriaceae;Propionibacterium;Propionibacterium acnes	51	3e-19	ERR006366.sra.7937496	ERR006366	ERX001138	SRS000639	SRP000547	ERA000141	1000 Genomes CEPH (Utah residents with ancestry from Northern and Western Europe) population sequencing	NA12830	NA12830.22	1000G-mpimg-090608-1	CEU	2009-10-06	58676877	1150527	WGS	low coverage	no	ILLUMINA	data/NA12830/sequence_read/ERR006366.filt.fastq.gz	MPIMG	PAIRED	Solexa 1G Genome Analyzer	GENOMIC	145
cellular organisms;Eukaryota;Opisthokonta;Metazoa;Eumetazoa;Bilateria;Coelomata;Deuterostomia;Chordata;Craniata;Vertebrata;Gnathostomata;Teleostomi;Euteleostomi;Sarcopterygii;Tetrapoda;Amniota;Mammalia;Theria;Eutheria;Euarchontoglires;Primates;Haplorrhini;Simiiformes;Catarrhini;Hominoidea;Hominidae;Homininae;Homo;Homo sapiens	51	3e-19	2	cellular organisms;Bacteria;Proteobacteria;Gammaproteobacteria;Enterobacteriales;Enterobacteriaceae;Yersinia;Yersinia enterocolitica	50	1e-18	ERR006355.sra.9454255	ERR006355	ERX001132	SRS000639	SRP000547	ERA000139	1000 Genomes CEPH (Utah residents with ancestry from Northern and Western Europe) population sequencing	NA12830	NA12830.22	1000G-mpimg-090522-4	CEU	2009-10-15	66968202	1313102	WGS	low coverage	no	ILLUMINA	data/NA12830/sequence_read/ERR006355.filt.fastq.gz	MPIMG	PAIRED	Solexa 1G Genome Analyzer	GENOMIC	164
cellular organisms;Eukaryota;Opisthokonta;Metazoa;Eumetazoa;Bilateria;Coelomata;Deuterostomia;Chordata;Craniata;Vertebrata;Gnathostomata;Teleostomi;Euteleostomi;Sarcopterygii;Tetrapoda;Amniota;Mammalia;Theria;Eutheria;Euarchontoglires;Primates;Haplorrhini;Simiiformes;Catarrhini;Hominoidea;Hominidae;Homininae;Homo;Homo sapiens	51	8e-17	1	cellular organisms;Bacteria;Proteobacteria;Gammaproteobacteria;Enterobacteriales;Enterobacteriaceae;Serratia;Serratia proteamaculans;Serratia proteamaculans 568	51	5e-12	ERR007484.sra.16503430	ERR007484	ERX002152	SRS001261	SRP000547	ERA000163	1000 Genomes CEPH (Utah residents with ancestry from Northern and Western Europe) population sequencing	NA11932	NA11932.13	1000G-mpimg-091023-8	CEU	2009-11-20	58795146	1152846	WGS	low coverage	no	ILLUMINA	data/NA11932/sequence_read/ERR007484.filt.fastq.gz	MPIMG	PAIRED	Solexa 1G Genome Analyzer	GENOMIC	204
cellular organisms;Eukaryota;Opisthokonta;Metazoa;Eumetazoa;Bilateria;Coelomata;Deuterostomia;Chordata;Craniata;Vertebrata;Gnathostomata;Teleostomi;Euteleostomi;Sarcopterygii;Tetrapoda;Amniota;Mammalia;Theria;Eutheria;Euarchontoglires;Primates;Haplorrhini;Simiiformes;Catarrhini;Hominoidea;Hominidae	51	3e-19	1	cellular organisms;Bacteria;Proteobacteria;Gammaproteobacteria;Xanthomonadales;Xanthomonadaceae;Stenotrophomonas;Stenotrophomonas maltophilia group;Stenotrophomonas maltophilia;Stenotrophomonas maltophilia JV3	51	2e-14	ERR006347.sra.6213755	ERR006347	ERX001127	SRS000639	SRP000547	ERA000138	1000 Genomes CEPH (Utah residents with ancestry from Northern and Western Europe) population sequencing	NA12830	NA12830.22	1000G-mpimg-090515-4	CEU	2009-10-06	5770701	113151	WGS	low coverage	no	ILLUMINA	data/NA12830/sequence_read/ERR006347.filt.fastq.gz	MPIMG	PAIRED	Solexa 1G Genome Analyzer	GENOMIC	184
cellular organisms;Eukaryota;Opisthokonta;Metazoa;Eumetazoa;Bilateria;Coelomata;Deuterostomia;Chordata;Craniata;Vertebrata;Gnathostomata;Teleostomi;Euteleostomi;Sarcopterygii;Tetrapoda;Amniota;Mammalia;Theria;Eutheria;Euarchontoglires;Primates;Haplorrhini;Simiiformes;Catarrhini	51	3e-19	1	cellular organisms;Bacteria;Proteobacteria;Gammaproteobacteria;Enterobacteriales;Enterobacteriaceae	51	3e-19	ERR006343.sra.5360098	ERR006343	ERX001125	SRS000639	SRP000547	ERA000137	1000 Genomes CEPH (Utah residents with ancestry from Northern and Western Europe) population sequencing	NA12830	NA12830.22_2-3	1000G-mpimg-090508-3	CEU	2009-10-06	95492553	1872403	WGS	low coverage	no	ILLUMINA	data/NA12830/sequence_read/ERR006343.filt.fastq.gz	MPIMG	PAIRED	Solexa 1G Genome Analyzer	GENOMIC	159
cellular organisms;Eukaryota;Opisthokonta;Metazoa;Eumetazoa;Bilateria;Coelomata;Deuterostomia;Chordata;Craniata;Vertebrata;Gnathostomata;Teleostomi;Euteleostomi;Sarcopterygii;Tetrapoda;Amniota;Mammalia;Theria;Eutheria;Euarchontoglires;Primates;Haplorrhini;Simiiformes;Catarrhini;Hominoidea;Hominidae;Homininae;Homo;Homo sapiens	51	3e-19	1	cellular organisms;Bacteria;Proteobacteria;Betaproteobacteria;Burkholderiales;Comamonadaceae;Acidovorax	51	3e-19	ERR006448.sra.8895233	ERR006448	ERX001166	SRS000621	SRP000547	ERA000154	1000 Genomes CEPH (Utah residents with ancestry from Northern and Western Europe) population sequencing	NA12286	NA12286.18	1000G-mpimg-090825-10	CEU	2009-10-08	117830145	2310395	WGS	low coverage	no	ILLUMINA	data/NA12286/sequence_read/ERR006448.filt.fastq.gz	MPIMG	PAIRED	Solexa 1G Genome Analyzer	GENOMIC	201
cellular organisms;Eukaryota;Opisthokonta;Metazoa;Eumetazoa;Bilateria;Coelomata;Deuterostomia;Chordata;Craniata;Vertebrata;Gnathostomata;Teleostomi;Euteleostomi;Sarcopterygii;Tetrapoda;Amniota;Mammalia;Theria;Eutheria;Euarchontoglires;Primates;Haplorrhini;Simiiformes;Catarrhini;Hominoidea;Hominidae;Homininae;Homo;Homo sapiens	51	3e-19	2	cellular organisms;Bacteria;Proteobacteria;Gammaproteobacteria;Xanthomonadales;Xanthomonadaceae;Stenotrophomonas;Stenotrophomonas maltophilia group;Stenotrophomonas maltophilia;Stenotrophomonas maltophilia R551-3	48	2e-17	ERR006390.sra.9268021	ERR006390	ERX001146	SRS000640	SRP000547	ERA000144	1000 Genomes CEPH (Utah residents with ancestry from Northern and Western Europe) population sequencing	NA12842	NA12842.23	1000G-mpimg-090625-8	CEU	2009-10-06	100035786	1961486	WGS	low coverage	no	ILLUMINA	data/NA12842/sequence_read/ERR006390.filt.fastq.gz	MPIMG	PAIRED	Solexa 1G Genome Analyzer	GENOMIC	171
cellular organisms;Eukaryota;Opisthokonta;Metazoa;Eumetazoa;Bilateria;Coelomata;Deuterostomia;Chordata;Craniata;Vertebrata;Gnathostomata;Teleostomi;Euteleostomi;Sarcopterygii;Tetrapoda;Amniota;Mammalia;Theria;Eutheria;Euarchontoglires;Primates;Haplorrhini;Simiiformes;Catarrhini;Hominoidea;Hominidae;Homininae;Homo;Homo sapiens	51	3e-19	2	cellular organisms;Bacteria;Actinobacteria;Actinobacteria;Actinobacteridae;Actinomycetales;Propionibacterineae;Propionibacteriaceae;Propionibacterium;Propionibacterium acnes	51	3e-19	ERR006390.sra.11329564	ERR006390	ERX001146	SRS000640	SRP000547	ERA000144	1000 Genomes CEPH (Utah residents with ancestry from Northern and Western Europe) population sequencing	NA12842	NA12842.23	1000G-mpimg-090625-8	CEU	2009-10-06	100035786	1961486	WGS	low coverage	no	ILLUMINA	data/NA12842/sequence_read/ERR006390.filt.fastq.gz	MPIMG	PAIRED	Solexa 1G Genome Analyzer	GENOMIC	171
cellular organisms;Eukaryota;Opisthokonta;Metazoa;Eumetazoa;Bilateria;Coelomata;Deuterostomia;Chordata;Craniata;Vertebrata;Gnathostomata;Teleostomi;Euteleostomi;Sarcopterygii;Tetrapoda;Amniota;Mammalia;Theria;Eutheria;Euarchontoglires	51	3e-19	1	cellular organisms;Bacteria;Proteobacteria;Gammaproteobacteria;Xanthomonadales;Xanthomonadaceae;Stenotrophomonas;Stenotrophomonas maltophilia group;Stenotrophomonas maltophilia;Stenotrophomonas maltophilia R551-3	51	2e-14	ERR006345.sra.7936670	ERR006345	ERX001127	SRS000639	SRP000547	ERA000138	1000 Genomes CEPH (Utah residents with ancestry from Northern and Western Europe) population sequencing	NA12830	NA12830.22	1000G-mpimg-090515-1	CEU	2009-10-06	20819118	408218	WGS	low coverage	no	ILLUMINA	data/NA12830/sequence_read/ERR006345.filt.fastq.gz	MPIMG	PAIRED	Solexa 1G Genome Analyzer	GENOMIC	184
cellular organisms;Eukaryota;Opisthokonta;Metazoa;Eumetazoa;Bilateria;Coelomata;Deuterostomia;Chordata;Craniata;Vertebrata;Gnathostomata;Teleostomi;Euteleostomi;Sarcopterygii;Tetrapoda;Amniota;Mammalia;Theria;Eutheria;Euarchontoglires;Primates;Haplorrhini;Simiiformes;Catarrhini;Hominoidea;Hominidae;Homininae;Homo;Homo sapiens	51	3e-19	1	cellular organisms;Bacteria;Proteobacteria;Gammaproteobacteria;Enterobacteriales;Enterobacteriaceae;Serratia;Serratia proteamaculans;Serratia proteamaculans 568	51	2e-14	ERR006355.sra.4776761	ERR006355	ERX001132	SRS000639	SRP000547	ERA000139	1000 Genomes CEPH (Utah residents with ancestry from Northern and Western Europe) population sequencing	NA12830	NA12830.22	1000G-mpimg-090522-4	CEU	2009-10-15	66968202	1313102	WGS	low coverage	no	ILLUMINA	data/NA12830/sequence_read/ERR006355.filt.fastq.gz	MPIMG	PAIRED	Solexa 1G Genome Analyzer	GENOMIC	164
cellular organisms;Eukaryota;Opisthokonta;Metazoa;Eumetazoa;Bilateria;Coelomata;Deuterostomia;Chordata;Craniata;Vertebrata;Gnathostomata;Teleostomi;Euteleostomi;Sarcopterygii;Tetrapoda;Amniota;Mammalia;Theria;Eutheria;Euarchontoglires;Primates;Haplorrhini;Simiiformes;Catarrhini;Hominoidea;Hominidae;Homininae;Homo;Homo sapiens	51	3e-19	1	cellular organisms;Bacteria;Proteobacteria;Gammaproteobacteria;Xanthomonadales;Xanthomonadaceae;Stenotrophomonas;Stenotrophomonas maltophilia group;Stenotrophomonas maltophilia;Stenotrophomonas maltophilia K279a	51	5e-12	ERR006347.sra.9019156	ERR006347	ERX001127	SRS000639	SRP000547	ERA000138	1000 Genomes CEPH (Utah residents with ancestry from Northern and Western Europe) population sequencing	NA12830	NA12830.22	1000G-mpimg-090515-4	CEU	2009-10-06	5770701	113151	WGS	low coverage	no	ILLUMINA	data/NA12830/sequence_read/ERR006347.filt.fastq.gz	MPIMG	PAIRED	Solexa 1G Genome Analyzer	GENOMIC	184
cellular organisms;Eukaryota;Opisthokonta;Metazoa;Eumetazoa;Bilateria;Coelomata;Deuterostomia;Chordata;Craniata;Vertebrata;Gnathostomata;Teleostomi;Euteleostomi;Sarcopterygii;Tetrapoda;Amniota;Mammalia;Theria;Eutheria;Euarchontoglires;Primates;Haplorrhini;Simiiformes;Catarrhini;Hominoidea;Hominidae;Homininae;Homo;Homo sapiens	51	8e-17	1	cellular organisms;Bacteria;Proteobacteria;Gammaproteobacteria;Xanthomonadales;Xanthomonadaceae;Stenotrophomonas;Stenotrophomonas maltophilia group;Stenotrophomonas maltophilia	51	3e-19	ERR006355.sra.10210560	ERR006355	ERX001132	SRS000639	SRP000547	ERA000139	1000 Genomes CEPH (Utah residents with ancestry from Northern and Western Europe) population sequencing	NA12830	NA12830.22	1000G-mpimg-090522-4	CEU	2009-10-15	66968202	1313102	WGS	low coverage	no	ILLUMINA	data/NA12830/sequence_read/ERR006355.filt.fastq.gz	MPIMG	PAIRED	Solexa 1G Genome Analyzer	GENOMIC	164
cellular organisms;Eukaryota;Opisthokonta;Metazoa;Eumetazoa;Bilateria;Coelomata;Deuterostomia;Chordata;Craniata;Vertebrata;Gnathostomata;Teleostomi;Euteleostomi;Sarcopterygii;Tetrapoda;Amniota;Mammalia;Theria;Eutheria;Euarchontoglires;Primates;Haplorrhini;Simiiformes;Catarrhini;Hominoidea;Hominidae;Homininae;Homo;Homo sapiens	51	3e-19	4	cellular organisms;Bacteria;Proteobacteria;Gammaproteobacteria;Enterobacteriales;Enterobacteriaceae;Serratia;Serratia proteamaculans;Serratia proteamaculans 568	46	8e-14	ERR006347.sra.9491457	ERR006347	ERX001127	SRS000639	SRP000547	ERA000138	1000 Genomes CEPH (Utah residents with ancestry from Northern and Western Europe) population sequencing	NA12830	NA12830.22	1000G-mpimg-090515-4	CEU	2009-10-06	5770701	113151	WGS	low coverage	no	ILLUMINA	data/NA12830/sequence_read/ERR006347.filt.fastq.gz	MPIMG	PAIRED	Solexa 1G Genome Analyzer	GENOMIC	184
cellular organisms;Eukaryota;Opisthokonta;Metazoa;Eumetazoa;Bilateria;Coelomata;Deuterostomia;Chordata;Craniata;Vertebrata;Gnathostomata;Teleostomi;Euteleostomi;Sarcopterygii;Tetrapoda;Amniota;Mammalia;Theria;Eutheria;Euarchontoglires;Primates;Haplorrhini;Simiiformes;Catarrhini;Hominoidea;Hominidae;Homininae;Homo;Homo sapiens	30	1e-06	3	cellular organisms;Bacteria;Proteobacteria;Gammaproteobacteria;Enterobacteriales;Enterobacteriaceae;Erwinia;Erwinia billingiae;Erwinia billingiae Eb661	51	2e-14	ERR006354.sra.1651773	ERR006354	ERX001132	SRS000639	SRP000547	ERA000139	1000 Genomes CEPH (Utah residents with ancestry from Northern and Western Europe) population sequencing	NA12830	NA12830.22	1000G-mpimg-090522-3	CEU	2009-10-15	41581728	815328	WGS	low coverage	no	ILLUMINA	data/NA12830/sequence_read/ERR006354.filt.fastq.gz	MPIMG	PAIRED	Solexa 1G Genome Analyzer	GENOMIC	164
cellular organisms;Eukaryota;Opisthokonta;Metazoa;Eumetazoa;Bilateria;Coelomata;Deuterostomia;Chordata;Craniata;Vertebrata;Gnathostomata;Teleostomi;Euteleostomi;Sarcopterygii;Tetrapoda;Amniota;Mammalia;Theria;Eutheria;Euarchontoglires;Primates;Haplorrhini;Simiiformes;Catarrhini;Hominoidea;Hominidae;Homininae;Homo;Homo sapiens	51	3e-19	1	cellular organisms;Bacteria;Proteobacteria;Gammaproteobacteria;Enterobacteriales;Enterobacteriaceae;Citrobacter;Citrobacter rodentium;Citrobacter rodentium ICC168	51	2e-14	ERR006366.sra.4378194	ERR006366	ERX001138	SRS000639	SRP000547	ERA000141	1000 Genomes CEPH (Utah residents with ancestry from Northern and Western Europe) population sequencing	NA12830	NA12830.22	1000G-mpimg-090608-1	CEU	2009-10-06	58676877	1150527	WGS	low coverage	no	ILLUMINA	data/NA12830/sequence_read/ERR006366.filt.fastq.gz	MPIMG	PAIRED	Solexa 1G Genome Analyzer	GENOMIC	145
cellular organisms;Eukaryota;Opisthokonta;Metazoa;Eumetazoa;Bilateria;Coelomata;Deuterostomia;Chordata;Craniata;Vertebrata;Gnathostomata;Teleostomi;Euteleostomi;Sarcopterygii;Tetrapoda;Amniota;Mammalia;Theria;Eutheria;Euarchontoglires;Primates;Haplorrhini;Simiiformes;Catarrhini;Hominoidea;Hominidae;Homininae;Homo;Homo sapiens	51	3e-19	1	cellular organisms;Bacteria;Proteobacteria;Gammaproteobacteria;Xanthomonadales;Xanthomonadaceae;Stenotrophomonas;Stenotrophomonas maltophilia group;Stenotrophomonas maltophilia	51	8e-17	ERR006347.sra.6800968	ERR006347	ERX001127	SRS000639	SRP000547	ERA000138	1000 Genomes CEPH (Utah residents with ancestry from Northern and Western Europe) population sequencing	NA12830	NA12830.22	1000G-mpimg-090515-4	CEU	2009-10-06	5770701	113151	WGS	low coverage	no	ILLUMINA	data/NA12830/sequence_read/ERR006347.filt.fastq.gz	MPIMG	PAIRED	Solexa 1G Genome Analyzer	GENOMIC	184
cellular organisms;Eukaryota;Opisthokonta;Metazoa;Eumetazoa;Bilateria;Coelomata;Deuterostomia;Chordata;Craniata;Vertebrata;Gnathostomata;Teleostomi;Euteleostomi;Sarcopterygii;Tetrapoda;Amniota;Mammalia;Theria;Eutheria;Euarchontoglires;Primates;Haplorrhini;Simiiformes;Catarrhini;Hominoidea;Hominidae;Homininae;Homo;Homo sapiens	51	3e-19	1	cellular organisms;Bacteria;Proteobacteria;Gammaproteobacteria;Xanthomonadales;Xanthomonadaceae;Stenotrophomonas;Stenotrophomonas maltophilia group;Stenotrophomonas maltophilia;Stenotrophomonas maltophilia JV3	47	2e-14	ERR006343.sra.6529960	ERR006343	ERX001125	SRS000639	SRP000547	ERA000137	1000 Genomes CEPH (Utah residents with ancestry from Northern and Western Europe) population sequencing	NA12830	NA12830.22_2-3	1000G-mpimg-090508-3	CEU	2009-10-06	95492553	1872403	WGS	low coverage	no	ILLUMINA	data/NA12830/sequence_read/ERR006343.filt.fastq.gz	MPIMG	PAIRED	Solexa 1G Genome Analyzer	GENOMIC	159
cellular organisms;Eukaryota;Opisthokonta;Metazoa;Eumetazoa;Bilateria;Coelomata;Deuterostomia;Chordata;Craniata;Vertebrata;Gnathostomata;Teleostomi;Euteleostomi;Sarcopterygii;Tetrapoda;Amniota;Mammalia;Theria;Eutheria;Euarchontoglires;Primates;Haplorrhini;Simiiformes;Catarrhini;Hominoidea;Hominidae;Homininae;Homo;Homo sapiens	51	8e-17	1	cellular organisms;Bacteria;Actinobacteria;Actinobacteria;Actinobacteridae;Actinomycetales;Propionibacterineae;Propionibacteriaceae;Propionibacterium;Propionibacterium acnes	51	3e-19	ERR006345.sra.8094675	ERR006345	ERX001127	SRS000639	SRP000547	ERA000138	1000 Genomes CEPH (Utah residents with ancestry from Northern and Western Europe) population sequencing	NA12830	NA12830.22	1000G-mpimg-090515-1	CEU	2009-10-06	20819118	408218	WGS	low coverage	no	ILLUMINA	data/NA12830/sequence_read/ERR006345.filt.fastq.gz	MPIMG	PAIRED	Solexa 1G Genome Analyzer	GENOMIC	184
cellular organisms;Eukaryota;Opisthokonta;Metazoa;Eumetazoa;Bilateria;Coelomata;Deuterostomia;Chordata;Craniata;Vertebrata;Gnathostomata;Teleostomi;Euteleostomi;Sarcopterygii;Tetrapoda;Amniota;Mammalia;Theria;Eutheria;Euarchontoglires;Primates;Haplorrhini;Simiiformes;Catarrhini;Hominoidea;Hominidae;Homininae;Homo;Homo sapiens	51	3e-19	1	cellular organisms;Bacteria;Proteobacteria;Gammaproteobacteria;Enterobacteriales;Enterobacteriaceae;Serratia;Serratia proteamaculans;Serratia proteamaculans 568	51	5e-12	ERR006347.sra.10141118	ERR006347	ERX001127	SRS000639	SRP000547	ERA000138	1000 Genomes CEPH (Utah residents with ancestry from Northern and Western Europe) population sequencing	NA12830	NA12830.22	1000G-mpimg-090515-4	CEU	2009-10-06	5770701	113151	WGS	low coverage	no	ILLUMINA	data/NA12830/sequence_read/ERR006347.filt.fastq.gz	MPIMG	PAIRED	Solexa 1G Genome Analyzer	GENOMIC	184
cellular organisms;Eukaryota;Opisthokonta;Metazoa;Eumetazoa;Bilateria;Coelomata;Deuterostomia;Chordata;Craniata;Vertebrata;Gnathostomata;Teleostomi;Euteleostomi;Sarcopterygii;Tetrapoda;Amniota;Mammalia;Theria;Eutheria;Euarchontoglires;Primates;Haplorrhini;Simiiformes;Catarrhini;Hominoidea;Hominidae;Homininae;Homo;Homo sapiens	51	3e-19	1	cellular organisms;Bacteria;Proteobacteria;Gammaproteobacteria;Enterobacteriales;Enterobacteriaceae;Serratia	51	8e-17	ERR006347.sra.8496296	ERR006347	ERX001127	SRS000639	SRP000547	ERA000138	1000 Genomes CEPH (Utah residents with ancestry from Northern and Western Europe) population sequencing	NA12830	NA12830.22	1000G-mpimg-090515-4	CEU	2009-10-06	5770701	113151	WGS	low coverage	no	ILLUMINA	data/NA12830/sequence_read/ERR006347.filt.fastq.gz	MPIMG	PAIRED	Solexa 1G Genome Analyzer	GENOMIC	184
cellular organisms;Eukaryota;Opisthokonta;Metazoa;Eumetazoa;Bilateria;Coelomata;Deuterostomia;Chordata;Craniata;Vertebrata;Gnathostomata;Teleostomi;Euteleostomi;Sarcopterygii;Tetrapoda;Amniota;Mammalia;Theria;Eutheria;Euarchontoglires;Primates;Haplorrhini;Simiiformes;Catarrhini;Hominoidea;Hominidae;Homininae;Homo;Homo sapiens	51	3e-19	2	cellular organisms;Bacteria;Proteobacteria;Gammaproteobacteria;Xanthomonadales;Xanthomonadaceae;Stenotrophomonas;Stenotrophomonas maltophilia group;Stenotrophomonas maltophilia;Stenotrophomonas maltophilia K279a	44	5e-15	ERR006347.sra.4293804	ERR006347	ERX001127	SRS000639	SRP000547	ERA000138	1000 Genomes CEPH (Utah residents with ancestry from Northern and Western Europe) population sequencing	NA12830	NA12830.22	1000G-mpimg-090515-4	CEU	2009-10-06	5770701	113151	WGS	low coverage	no	ILLUMINA	data/NA12830/sequence_read/ERR006347.filt.fastq.gz	MPIMG	PAIRED	Solexa 1G Genome Analyzer	GENOMIC	184
cellular organisms;Eukaryota;Opisthokonta;Metazoa;Eumetazoa;Bilateria;Coelomata;Deuterostomia;Chordata;Craniata;Vertebrata;Gnathostomata;Teleostomi;Euteleostomi;Sarcopterygii;Tetrapoda;Amniota;Mammalia;Theria;Eutheria;Euarchontoglires;Primates;Haplorrhini;Simiiformes;Catarrhini;Hominoidea;Hominidae;Homininae;Homo;Homo sapiens	51	3e-19	2	cellular organisms;Bacteria;Proteobacteria;Gammaproteobacteria;Xanthomonadales;Xanthomonadaceae;Stenotrophomonas;Stenotrophomonas maltophilia group;Stenotrophomonas maltophilia	41	3e-13	ERR006347.sra.1845209	ERR006347	ERX001127	SRS000639	SRP000547	ERA000138	1000 Genomes CEPH (Utah residents with ancestry from Northern and Western Europe) population sequencing	NA12830	NA12830.22	1000G-mpimg-090515-4	CEU	2009-10-06	5770701	113151	WGS	low coverage	no	ILLUMINA	data/NA12830/sequence_read/ERR006347.filt.fastq.gz	MPIMG	PAIRED	Solexa 1G Genome Analyzer	GENOMIC	184
cellular organisms;Eukaryota;Opisthokonta;Metazoa;Eumetazoa;Bilateria;Coelomata;Deuterostomia;Chordata;Craniata;Vertebrata;Gnathostomata;Teleostomi;Euteleostomi;Sarcopterygii;Tetrapoda;Amniota;Mammalia;Theria;Eutheria;Euarchontoglires;Primates;Haplorrhini;Simiiformes;Catarrhini;Hominoidea;Hominidae;Homininae;Homo;Homo sapiens	51	2e-17	1	cellular organisms;Bacteria;Proteobacteria;Gammaproteobacteria;Xanthomonadales;Xanthomonadaceae	51	2e-14	ERR006355.sra.11953609	ERR006355	ERX001132	SRS000639	SRP000547	ERA000139	1000 Genomes CEPH (Utah residents with ancestry from Northern and Western Europe) population sequencing	NA12830	NA12830.22	1000G-mpimg-090522-4	CEU	2009-10-15	66968202	1313102	WGS	low coverage	no	ILLUMINA	data/NA12830/sequence_read/ERR006355.filt.fastq.gz	MPIMG	PAIRED	Solexa 1G Genome Analyzer	GENOMIC	164
cellular organisms;Eukaryota;Opisthokonta;Metazoa;Eumetazoa;Bilateria;Coelomata;Deuterostomia;Chordata;Craniata;Vertebrata;Gnathostomata;Teleostomi;Euteleostomi;Sarcopterygii;Tetrapoda;Amniota;Mammalia;Theria;Eutheria;Euarchontoglires;Primates;Haplorrhini;Simiiformes;Catarrhini;Hominoidea;Hominidae;Homininae;Homo;Homo sapiens	51	8e-17	1	cellular organisms;Bacteria;Proteobacteria;Gammaproteobacteria;Enterobacteriales;Enterobacteriaceae	49	5e-18	ERR006356.sra.1843306	ERR006356	ERX001132	SRS000639	SRP000547	ERA000139	1000 Genomes CEPH (Utah residents with ancestry from Northern and Western Europe) population sequencing	NA12830	NA12830.22	1000G-mpimg-090522-5	CEU	2009-10-15	32761380	642380	WGS	low coverage	no	ILLUMINA	data/NA12830/sequence_read/ERR006356.filt.fastq.gz	MPIMG	PAIRED	Solexa 1G Genome Analyzer	GENOMIC	164
cellular organisms;Eukaryota;Opisthokonta;Metazoa;Eumetazoa;Bilateria;Coelomata;Deuterostomia;Chordata;Craniata;Vertebrata;Gnathostomata;Teleostomi;Euteleostomi;Sarcopterygii;Tetrapoda;Amniota;Mammalia;Theria;Eutheria;Euarchontoglires;Primates;Haplorrhini;Simiiformes;Catarrhini;Hominoidea;Hominidae;Homininae;Homo;Homo sapiens	51	8e-17	1	cellular organisms;Bacteria;Proteobacteria;Gammaproteobacteria;Xanthomonadales;Xanthomonadaceae;Stenotrophomonas;Stenotrophomonas maltophilia group;Stenotrophomonas maltophilia	51	2e-14	ERR006347.sra.2923655	ERR006347	ERX001127	SRS000639	SRP000547	ERA000138	1000 Genomes CEPH (Utah residents with ancestry from Northern and Western Europe) population sequencing	NA12830	NA12830.22	1000G-mpimg-090515-4	CEU	2009-10-06	5770701	113151	WGS	low coverage	no	ILLUMINA	data/NA12830/sequence_read/ERR006347.filt.fastq.gz	MPIMG	PAIRED	Solexa 1G Genome Analyzer	GENOMIC	184
cellular organisms;Eukaryota;Opisthokonta;Metazoa;Eumetazoa;Bilateria;Coelomata;Deuterostomia;Chordata;Craniata;Vertebrata;Gnathostomata;Teleostomi;Euteleostomi;Sarcopterygii;Tetrapoda;Amniota;Mammalia;Theria;Eutheria;Euarchontoglires;Primates;Haplorrhini;Simiiformes;Catarrhini;Hominoidea;Hominidae;Homininae;Homo;Homo sapiens	51	3e-19	2	cellular organisms;Bacteria;Proteobacteria;Gammaproteobacteria;Xanthomonadales;Xanthomonadaceae;Stenotrophomonas;Stenotrophomonas maltophilia group;Stenotrophomonas maltophilia	47	8e-17	ERR006347.sra.11674504	ERR006347	ERX001127	SRS000639	SRP000547	ERA000138	1000 Genomes CEPH (Utah residents with ancestry from Northern and Western Europe) population sequencing	NA12830	NA12830.22	1000G-mpimg-090515-4	CEU	2009-10-06	5770701	113151	WGS	low coverage	no	ILLUMINA	data/NA12830/sequence_read/ERR006347.filt.fastq.gz	MPIMG	PAIRED	Solexa 1G Genome Analyzer	GENOMIC	184
cellular organisms;Eukaryota;Opisthokonta;Metazoa;Eumetazoa;Bilateria;Coelomata;Deuterostomia;Chordata;Craniata;Vertebrata;Gnathostomata;Teleostomi;Euteleostomi;Sarcopterygii;Tetrapoda;Amniota;Mammalia;Theria;Eutheria;Euarchontoglires;Primates;Haplorrhini;Simiiformes;Catarrhini;Hominoidea;Hominidae;Homininae;Homo;Homo sapiens	51	8e-17	1	cellular organisms;Bacteria;Proteobacteria;Gammaproteobacteria;Pseudomonadales;Pseudomonadaceae;Pseudomonas;Pseudomonas stutzeri group;Pseudomonas stutzeri subgroup;Pseudomonas stutzeri	51	2e-14	ERR006355.sra.2186891	ERR006355	ERX001132	SRS000639	SRP000547	ERA000139	1000 Genomes CEPH (Utah residents with ancestry from Northern and Western Europe) population sequencing	NA12830	NA12830.22	1000G-mpimg-090522-4	CEU	2009-10-15	66968202	1313102	WGS	low coverage	no	ILLUMINA	data/NA12830/sequence_read/ERR006355.filt.fastq.gz	MPIMG	PAIRED	Solexa 1G Genome Analyzer	GENOMIC	164
cellular organisms;Eukaryota;Opisthokonta;Metazoa;Eumetazoa;Bilateria;Coelomata;Deuterostomia;Chordata;Craniata;Vertebrata;Gnathostomata;Teleostomi;Euteleostomi;Sarcopterygii;Tetrapoda;Amniota;Mammalia;Theria;Eutheria;Euarchontoglires;Primates;Haplorrhini;Simiiformes;Catarrhini;Hominoidea;Hominidae;Homininae;Homo;Homo sapiens	51	3e-19	1	cellular organisms;Bacteria;Proteobacteria;Gammaproteobacteria;Enterobacteriales;Enterobacteriaceae;Klebsiella;Klebsiella pneumoniae;Klebsiella pneumoniae 342	49	3e-13	ERR006383.sra.683292	ERR006383	ERX001145	SRS000639	SRP000547	ERA000143	1000 Genomes CEPH (Utah residents with ancestry from Northern and Western Europe) population sequencing	NA12830	NA12830.22	1000G-mpimg-090619-8	CEU	2009-10-06	66350439	1300989	WGS	low coverage	no	ILLUMINA	data/NA12830/sequence_read/ERR006383.filt.fastq.gz	MPIMG	PAIRED	Solexa 1G Genome Analyzer	GENOMIC	146
cellular organisms;Eukaryota;Opisthokonta;Metazoa;Eumetazoa;Bilateria;Coelomata;Deuterostomia;Chordata;Craniata;Vertebrata;Gnathostomata;Teleostomi;Euteleostomi;Sarcopterygii;Tetrapoda;Amniota;Mammalia;Theria;Eutheria;Euarchontoglires;Primates;Haplorrhini;Simiiformes;Catarrhini;Hominoidea;Hominidae;Homininae;Homo;Homo sapiens	51	8e-17	2	cellular organisms;Bacteria;Proteobacteria;Gammaproteobacteria;Xanthomonadales;Xanthomonadaceae;Stenotrophomonas;Stenotrophomonas maltophilia group;Stenotrophomonas maltophilia	51	3e-19	ERR006345.sra.2508697	ERR006345	ERX001127	SRS000639	SRP000547	ERA000138	1000 Genomes CEPH (Utah residents with ancestry from Northern and Western Europe) population sequencing	NA12830	NA12830.22	1000G-mpimg-090515-1	CEU	2009-10-06	20819118	408218	WGS	low coverage	no	ILLUMINA	data/NA12830/sequence_read/ERR006345.filt.fastq.gz	MPIMG	PAIRED	Solexa 1G Genome Analyzer	GENOMIC	184
cellular organisms;Eukaryota;Opisthokonta;Metazoa;Eumetazoa;Bilateria;Coelomata;Deuterostomia;Chordata;Craniata;Vertebrata;Gnathostomata;Teleostomi;Euteleostomi;Sarcopterygii;Tetrapoda;Amniota;Mammalia;Theria;Eutheria;Euarchontoglires;Primates;Haplorrhini;Simiiformes;Catarrhini;Hominoidea;Hominidae;Homininae;Homo;Homo sapiens	51	3e-19	1	cellular organisms;Bacteria;Proteobacteria;Gammaproteobacteria;Enterobacteriales;Enterobacteriaceae	51	5e-12	ERR006347.sra.9367355	ERR006347	ERX001127	SRS000639	SRP000547	ERA000138	1000 Genomes CEPH (Utah residents with ancestry from Northern and Western Europe) population sequencing	NA12830	NA12830.22	1000G-mpimg-090515-4	CEU	2009-10-06	5770701	113151	WGS	low coverage	no	ILLUMINA	data/NA12830/sequence_read/ERR006347.filt.fastq.gz	MPIMG	PAIRED	Solexa 1G Genome Analyzer	GENOMIC	184
cellular organisms;Eukaryota;Opisthokonta;Metazoa;Eumetazoa;Bilateria;Coelomata;Deuterostomia;Chordata;Craniata;Vertebrata;Gnathostomata;Teleostomi;Euteleostomi;Sarcopterygii;Tetrapoda;Amniota;Mammalia;Theria;Eutheria;Euarchontoglires;Primates;Haplorrhini;Simiiformes;Catarrhini;Hominoidea;Hominidae;Homininae;Homo;Homo sapiens	51	3e-19	1	cellular organisms;Bacteria;Proteobacteria;Gammaproteobacteria;Enterobacteriales;Enterobacteriaceae;Serratia;Serratia proteamaculans;Serratia proteamaculans 568	51	5e-12	ERR006346.sra.5802530	ERR006346	ERX001127	SRS000639	SRP000547	ERA000138	1000 Genomes CEPH (Utah residents with ancestry from Northern and Western Europe) population sequencing	NA12830	NA12830.22	1000G-mpimg-090515-2	CEU	2009-10-06	10555929	206979	WGS	low coverage	no	ILLUMINA	data/NA12830/sequence_read/ERR006346.filt.fastq.gz	MPIMG	PAIRED	Solexa 1G Genome Analyzer	GENOMIC	184
cellular organisms;Eukaryota;Opisthokonta;Metazoa;Eumetazoa;Bilateria;Coelomata;Deuterostomia;Chordata;Craniata;Vertebrata;Gnathostomata;Teleostomi;Euteleostomi;Sarcopterygii;Tetrapoda;Amniota;Mammalia;Theria;Eutheria;Euarchontoglires;Primates;Haplorrhini;Simiiformes;Catarrhini;Hominoidea;Hominidae;Homininae;Homo;Homo sapiens	49	3e-13	1	cellular organisms;Bacteria;Proteobacteria	48	2e-17	ERR006392.sra.18595697	ERR006392	ERX001148	SRS000639	SRP000547	ERA000145	1000 Genomes CEPH (Utah residents with ancestry from Northern and Western Europe) population sequencing	NA12830	NA12830.22	1000G-mpimg-090703-2	CEU	2009-10-06	102216852	2004252	WGS	low coverage	no	ILLUMINA	data/NA12830/sequence_read/ERR006392.filt.fastq.gz	MPIMG	PAIRED	Solexa 1G Genome Analyzer	GENOMIC	147
cellular organisms;Eukaryota;Opisthokonta;Metazoa;Eumetazoa;Bilateria;Coelomata;Deuterostomia;Chordata;Craniata;Vertebrata;Gnathostomata;Teleostomi;Euteleostomi;Sarcopterygii;Tetrapoda;Amniota;Mammalia;Theria;Eutheria;Euarchontoglires;Primates;Haplorrhini;Simiiformes;Catarrhini;Hominoidea;Hominidae;Homininae;Homo;Homo sapiens	51	3e-19	1	cellular organisms;Bacteria;Proteobacteria;Gammaproteobacteria;Xanthomonadales;Xanthomonadaceae;Stenotrophomonas;Stenotrophomonas maltophilia group;Stenotrophomonas maltophilia;Stenotrophomonas maltophilia R551-3	51	2e-14	ERR006347.sra.9244459	ERR006347	ERX001127	SRS000639	SRP000547	ERA000138	1000 Genomes CEPH (Utah residents with ancestry from Northern and Western Europe) population sequencing	NA12830	NA12830.22	1000G-mpimg-090515-4	CEU	2009-10-06	5770701	113151	WGS	low coverage	no	ILLUMINA	data/NA12830/sequence_read/ERR006347.filt.fastq.gz	MPIMG	PAIRED	Solexa 1G Genome Analyzer	GENOMIC	184
cellular organisms;Eukaryota;Opisthokonta;Metazoa;Eumetazoa;Bilateria;Coelomata;Deuterostomia;Chordata;Craniata;Vertebrata;Gnathostomata;Teleostomi;Euteleostomi;Sarcopterygii;Tetrapoda;Amniota;Mammalia;Theria;Eutheria;Euarchontoglires;Primates;Haplorrhini;Simiiformes;Catarrhini;Hominoidea;Hominidae;Homininae;Homo;Homo sapiens	36	2e-10	1	cellular organisms;Bacteria;Proteobacteria;Betaproteobacteria;Burkholderiales;unclassified Burkholderiales;Burkholderiales Genera incertae sedis;Methylibium;Methylibium petroleiphilum;Methylibium petroleiphilum PM1	34	2e-09	ERR006262.sra.3484212	ERR006262	ERX001093	SRS000633	SRP000547	ERA000126	1000 Genomes CEPH (Utah residents with ancestry from Northern and Western Europe) population sequencing	NA12748	NA12748.19	1000G-mpimg-090220-6	CEU	2009-10-06	15307308	425203	WGS	low coverage	no	ILLUMINA	data/NA12748/sequence_read/ERR006262.filt.fastq.gz	MPIMG	PAIRED	Solexa 1G Genome Analyzer	GENOMIC	175
cellular organisms;Eukaryota;Opisthokonta;Metazoa;Eumetazoa;Bilateria;Coelomata;Deuterostomia;Chordata;Craniata;Vertebrata;Gnathostomata;Teleostomi;Euteleostomi;Sarcopterygii;Tetrapoda;Amniota;Mammalia;Theria;Eutheria;Euarchontoglires;Primates;Haplorrhini;Simiiformes;Catarrhini;Hominoidea;Hominidae;Homininae;Homo;Homo sapiens	50	1e-18	1	cellular organisms;Bacteria;Actinobacteria;Actinobacteria;Actinobacteridae;Actinomycetales;Propionibacterineae;Propionibacteriaceae;Propionibacterium;Propionibacterium acnes	51	3e-19	ERR006390.sra.7776674	ERR006390	ERX001146	SRS000640	SRP000547	ERA000144	1000 Genomes CEPH (Utah residents with ancestry from Northern and Western Europe) population sequencing	NA12842	NA12842.23	1000G-mpimg-090625-8	CEU	2009-10-06	100035786	1961486	WGS	low coverage	no	ILLUMINA	data/NA12842/sequence_read/ERR006390.filt.fastq.gz	MPIMG	PAIRED	Solexa 1G Genome Analyzer	GENOMIC	171
cellular organisms;Eukaryota;Opisthokonta;Metazoa;Eumetazoa;Bilateria;Coelomata;Deuterostomia;Chordata;Craniata;Vertebrata;Gnathostomata;Teleostomi;Euteleostomi;Sarcopterygii;Tetrapoda;Amniota;Mammalia;Theria;Eutheria;Euarchontoglires;Primates;Haplorrhini;Simiiformes;Catarrhini;Hominoidea;Hominidae;Homininae;Homo;Homo sapiens	51	2e-17	1	cellular organisms;Bacteria;Proteobacteria;Gammaproteobacteria;Enterobacteriales;Enterobacteriaceae;Serratia;Serratia marcescens	51	3e-19	ERR006366.sra.9416359	ERR006366	ERX001138	SRS000639	SRP000547	ERA000141	1000 Genomes CEPH (Utah residents with ancestry from Northern and Western Europe) population sequencing	NA12830	NA12830.22	1000G-mpimg-090608-1	CEU	2009-10-06	58676877	1150527	WGS	low coverage	no	ILLUMINA	data/NA12830/sequence_read/ERR006366.filt.fastq.gz	MPIMG	PAIRED	Solexa 1G Genome Analyzer	GENOMIC	145
cellular organisms;Eukaryota;Opisthokonta;Metazoa;Eumetazoa;Bilateria;Coelomata;Deuterostomia;Chordata;Craniata;Vertebrata;Gnathostomata;Teleostomi;Euteleostomi;Sarcopterygii;Tetrapoda;Amniota;Mammalia;Theria;Eutheria;Euarchontoglires;Primates;Haplorrhini;Simiiformes;Catarrhini;Hominoidea;Hominidae;Homininae;Homo;Homo sapiens	51	3e-19	2	cellular organisms;Bacteria;Proteobacteria;Gammaproteobacteria;Xanthomonadales;Xanthomonadaceae;Stenotrophomonas;Stenotrophomonas maltophilia group;Stenotrophomonas maltophilia;Stenotrophomonas maltophilia R551-3	51	8e-17	ERR006347.sra.2824803	ERR006347	ERX001127	SRS000639	SRP000547	ERA000138	1000 Genomes CEPH (Utah residents with ancestry from Northern and Western Europe) population sequencing	NA12830	NA12830.22	1000G-mpimg-090515-4	CEU	2009-10-06	5770701	113151	WGS	low coverage	no	ILLUMINA	data/NA12830/sequence_read/ERR006347.filt.fastq.gz	MPIMG	PAIRED	Solexa 1G Genome Analyzer	GENOMIC	184
cellular organisms;Eukaryota;Opisthokonta;Metazoa;Eumetazoa;Bilateria;Coelomata;Deuterostomia;Chordata;Craniata;Vertebrata;Gnathostomata;Teleostomi;Euteleostomi;Sarcopterygii;Tetrapoda;Amniota;Mammalia;Theria;Eutheria;Euarchontoglires;Primates;Haplorrhini;Simiiformes;Catarrhini;Hominoidea;Hominidae;Homininae;Homo;Homo sapiens	51	3e-19	2	cellular organisms;Bacteria;Proteobacteria;Gammaproteobacteria;Enterobacteriales;Enterobacteriaceae	47	2e-14	ERR006355.sra.8396745	ERR006355	ERX001132	SRS000639	SRP000547	ERA000139	1000 Genomes CEPH (Utah residents with ancestry from Northern and Western Europe) population sequencing	NA12830	NA12830.22	1000G-mpimg-090522-4	CEU	2009-10-15	66968202	1313102	WGS	low coverage	no	ILLUMINA	data/NA12830/sequence_read/ERR006355.filt.fastq.gz	MPIMG	PAIRED	Solexa 1G Genome Analyzer	GENOMIC	164
cellular organisms;Eukaryota;Opisthokonta;Metazoa;Eumetazoa;Bilateria;Coelomata;Deuterostomia;Chordata;Craniata;Vertebrata;Gnathostomata;Teleostomi;Euteleostomi;Sarcopterygii;Tetrapoda;Amniota;Mammalia;Theria;Eutheria;Euarchontoglires;Primates;Haplorrhini;Simiiformes;Catarrhini;Hominoidea;Hominidae	51	3e-19	1	cellular organisms;Bacteria;Actinobacteria;Actinobacteria;Actinobacteridae;Actinomycetales;Propionibacterineae;Propionibacteriaceae;Propionibacterium;Propionibacterium acnes	51	3e-19	ERR006345.sra.8827141	ERR006345	ERX001127	SRS000639	SRP000547	ERA000138	1000 Genomes CEPH (Utah residents with ancestry from Northern and Western Europe) population sequencing	NA12830	NA12830.22	1000G-mpimg-090515-1	CEU	2009-10-06	20819118	408218	WGS	low coverage	no	ILLUMINA	data/NA12830/sequence_read/ERR006345.filt.fastq.gz	MPIMG	PAIRED	Solexa 1G Genome Analyzer	GENOMIC	184
cellular organisms;Eukaryota;Opisthokonta;Metazoa;Eumetazoa;Bilateria;Coelomata;Deuterostomia;Chordata;Craniata;Vertebrata;Gnathostomata;Teleostomi;Euteleostomi;Sarcopterygii;Tetrapoda;Amniota;Mammalia;Theria;Eutheria;Euarchontoglires;Primates;Haplorrhini;Simiiformes;Catarrhini;Hominoidea;Hominidae;Homininae;Homo;Homo sapiens	51	8e-17	1	cellular organisms;Bacteria;Proteobacteria;Gammaproteobacteria;Xanthomonadales;Xanthomonadaceae;Stenotrophomonas;Stenotrophomonas maltophilia group;Stenotrophomonas maltophilia;Stenotrophomonas maltophilia JV3	51	8e-17	ERR006347.sra.6492484	ERR006347	ERX001127	SRS000639	SRP000547	ERA000138	1000 Genomes CEPH (Utah residents with ancestry from Northern and Western Europe) population sequencing	NA12830	NA12830.22	1000G-mpimg-090515-4	CEU	2009-10-06	5770701	113151	WGS	low coverage	no	ILLUMINA	data/NA12830/sequence_read/ERR006347.filt.fastq.gz	MPIMG	PAIRED	Solexa 1G Genome Analyzer	GENOMIC	184
cellular organisms;Eukaryota;Opisthokonta;Metazoa;Eumetazoa;Bilateria;Coelomata;Deuterostomia;Chordata;Craniata;Vertebrata;Gnathostomata;Teleostomi;Euteleostomi;Sarcopterygii;Tetrapoda;Amniota;Mammalia;Theria;Eutheria;Euarchontoglires;Primates;Haplorrhini;Simiiformes;Catarrhini;Hominoidea;Hominidae;Homininae;Homo;Homo sapiens	51	3e-19	1	cellular organisms;Bacteria;Proteobacteria;Gammaproteobacteria;Xanthomonadales;Xanthomonadaceae;Stenotrophomonas;Stenotrophomonas maltophilia group;Stenotrophomonas maltophilia;Stenotrophomonas maltophilia R551-3	51	8e-17	ERR006347.sra.11520468	ERR006347	ERX001127	SRS000639	SRP000547	ERA000138	1000 Genomes CEPH (Utah residents with ancestry from Northern and Western Europe) population sequencing	NA12830	NA12830.22	1000G-mpimg-090515-4	CEU	2009-10-06	5770701	113151	WGS	low coverage	no	ILLUMINA	data/NA12830/sequence_read/ERR006347.filt.fastq.gz	MPIMG	PAIRED	Solexa 1G Genome Analyzer	GENOMIC	184
cellular organisms;Eukaryota;Opisthokonta;Metazoa;Eumetazoa;Bilateria;Coelomata;Deuterostomia;Chordata;Craniata;Vertebrata;Gnathostomata;Teleostomi;Euteleostomi;Sarcopterygii;Tetrapoda;Amniota;Mammalia;Theria;Eutheria;Euarchontoglires;Primates;Haplorrhini;Simiiformes;Catarrhini;Hominoidea;Hominidae;Homininae;Homo;Homo sapiens	51	8e-17	1	cellular organisms;Bacteria;Proteobacteria;Gammaproteobacteria;Enterobacteriales;Enterobacteriaceae;Serratia;Serratia proteamaculans;Serratia proteamaculans 568	51	2e-14	ERR006347.sra.2152246	ERR006347	ERX001127	SRS000639	SRP000547	ERA000138	1000 Genomes CEPH (Utah residents with ancestry from Northern and Western Europe) population sequencing	NA12830	NA12830.22	1000G-mpimg-090515-4	CEU	2009-10-06	5770701	113151	WGS	low coverage	no	ILLUMINA	data/NA12830/sequence_read/ERR006347.filt.fastq.gz	MPIMG	PAIRED	Solexa 1G Genome Analyzer	GENOMIC	184
cellular organisms;Eukaryota;Opisthokonta;Metazoa;Eumetazoa;Bilateria;Coelomata;Deuterostomia;Chordata;Craniata;Vertebrata;Gnathostomata;Teleostomi;Euteleostomi;Sarcopterygii;Tetrapoda;Amniota;Mammalia;Theria;Eutheria;Euarchontoglires;Primates;Haplorrhini;Simiiformes;Catarrhini;Hominoidea;Hominidae;Homininae;Homo;Homo sapiens	51	3e-19	2	cellular organisms;Bacteria;Proteobacteria;Gammaproteobacteria;Xanthomonadales;Xanthomonadaceae;Stenotrophomonas;Stenotrophomonas maltophilia group;Stenotrophomonas maltophilia	51	2e-14	ERR006347.sra.10272072	ERR006347	ERX001127	SRS000639	SRP000547	ERA000138	1000 Genomes CEPH (Utah residents with ancestry from Northern and Western Europe) population sequencing	NA12830	NA12830.22	1000G-mpimg-090515-4	CEU	2009-10-06	5770701	113151	WGS	low coverage	no	ILLUMINA	data/NA12830/sequence_read/ERR006347.filt.fastq.gz	MPIMG	PAIRED	Solexa 1G Genome Analyzer	GENOMIC	184
cellular organisms;Eukaryota;Opisthokonta;Metazoa;Eumetazoa;Bilateria;Coelomata;Deuterostomia;Chordata;Craniata;Vertebrata;Gnathostomata;Teleostomi;Euteleostomi;Sarcopterygii;Tetrapoda;Amniota;Mammalia;Theria;Eutheria;Euarchontoglires;Primates;Haplorrhini;Simiiformes	51	3e-19	1	cellular organisms;Bacteria;Proteobacteria;Gammaproteobacteria;Enterobacteriales;Enterobacteriaceae;Serratia;Serratia marcescens	38	2e-11	ERR006347.sra.1267526	ERR006347	ERX001127	SRS000639	SRP000547	ERA000138	1000 Genomes CEPH (Utah residents with ancestry from Northern and Western Europe) population sequencing	NA12830	NA12830.22	1000G-mpimg-090515-4	CEU	2009-10-06	5770701	113151	WGS	low coverage	no	ILLUMINA	data/NA12830/sequence_read/ERR006347.filt.fastq.gz	MPIMG	PAIRED	Solexa 1G Genome Analyzer	GENOMIC	184
cellular organisms;Eukaryota;Opisthokonta;Metazoa;Eumetazoa;Bilateria;Coelomata;Deuterostomia;Chordata;Craniata;Vertebrata;Gnathostomata;Teleostomi;Euteleostomi;Sarcopterygii;Tetrapoda;Amniota;Mammalia;Theria;Eutheria;Euarchontoglires;Primates;Haplorrhini;Simiiformes;Catarrhini;Hominoidea;Hominidae;Homininae;Homo;Homo sapiens	37	4e-11	1	cellular organisms;Bacteria;Actinobacteria;Actinobacteria;Actinobacteridae;Actinomycetales;Micrococcineae;Micrococcaceae;Rothia;Rothia mucilaginosa;Rothia mucilaginosa DY-18	37	4e-11	ERR000836.sra.4438982	ERR000836	ERX000066	SRS000033	SRP000031	ERA000024	1000Genomes Project Pilot 1	NA07000	g1k-sc-NA07000-CEU-1	IL4_993_8	CEU	2008-08-12	3162612	85476	WGS	low coverage	no	ILLUMINA	data/NA07000/sequence_read/ERR000836.filt.fastq.gz	SC	PAIRED	Solexa 1G Genome Analyzer	GENOMIC	175
cellular organisms;Eukaryota;Opisthokonta;Metazoa;Eumetazoa;Bilateria;Coelomata;Deuterostomia;Chordata;Craniata;Vertebrata;Gnathostomata;Teleostomi;Euteleostomi;Sarcopterygii;Tetrapoda;Amniota;Mammalia;Theria;Eutheria;Euarchontoglires;Primates;Haplorrhini;Simiiformes;Catarrhini;Hominoidea;Hominidae;Homininae;Homo;Homo sapiens	51	3e-19	1	cellular organisms;Bacteria;Proteobacteria;Gammaproteobacteria;Xanthomonadales;Xanthomonadaceae;Stenotrophomonas;Stenotrophomonas maltophilia group;Stenotrophomonas maltophilia	51	8e-17	ERR006346.sra.14196372	ERR006346	ERX001127	SRS000639	SRP000547	ERA000138	1000 Genomes CEPH (Utah residents with ancestry from Northern and Western Europe) population sequencing	NA12830	NA12830.22	1000G-mpimg-090515-2	CEU	2009-10-06	10555929	206979	WGS	low coverage	no	ILLUMINA	data/NA12830/sequence_read/ERR006346.filt.fastq.gz	MPIMG	PAIRED	Solexa 1G Genome Analyzer	GENOMIC	184
cellular organisms;Eukaryota;Opisthokonta;Metazoa;Eumetazoa;Bilateria;Coelomata;Deuterostomia;Chordata;Craniata;Vertebrata;Gnathostomata;Teleostomi;Euteleostomi;Sarcopterygii;Tetrapoda;Amniota;Mammalia;Theria;Eutheria;Euarchontoglires;Primates;Haplorrhini;Simiiformes;Catarrhini;Hominoidea;Hominidae;Homininae;Homo;Homo sapiens	51	3e-19	4	cellular organisms;Bacteria;Proteobacteria;Gammaproteobacteria;Xanthomonadales;Xanthomonadaceae;Stenotrophomonas;Stenotrophomonas maltophilia group;Stenotrophomonas maltophilia;Stenotrophomonas maltophilia K279a	49	1e-15	ERR006345.sra.2428907	ERR006345	ERX001127	SRS000639	SRP000547	ERA000138	1000 Genomes CEPH (Utah residents with ancestry from Northern and Western Europe) population sequencing	NA12830	NA12830.22	1000G-mpimg-090515-1	CEU	2009-10-06	20819118	408218	WGS	low coverage	no	ILLUMINA	data/NA12830/sequence_read/ERR006345.filt.fastq.gz	MPIMG	PAIRED	Solexa 1G Genome Analyzer	GENOMIC	184
cellular organisms;Eukaryota;Opisthokonta;Metazoa;Eumetazoa;Bilateria;Coelomata;Deuterostomia;Chordata;Craniata;Vertebrata;Gnathostomata;Teleostomi;Euteleostomi;Sarcopterygii;Tetrapoda;Amniota;Mammalia;Theria;Eutheria;Euarchontoglires;Primates;Haplorrhini;Simiiformes;Catarrhini;Hominoidea;Hominidae;Homininae;Homo;Homo sapiens	37	4e-11	1	cellular organisms;Bacteria;Actinobacteria;Actinobacteria;Actinobacteridae;Actinomycetales;Propionibacterineae;Propionibacteriaceae;Propionibacterium;Propionibacterium acnes	37	4e-11	ERR001038.sra.4204182	ERR001038	ERX000066	SRS000033	SRP000031	ERA000024	1000Genomes Project Pilot 1	NA07000	g1k-sc-NA07000-CEU-1	IL17_1004_8	CEU	2008-08-12	900099	24327	WGS	low coverage	no	ILLUMINA	data/NA07000/sequence_read/ERR001038.filt.fastq.gz	SC	PAIRED	Solexa 1G Genome Analyzer	GENOMIC	175
cellular organisms;Eukaryota;Opisthokonta;Metazoa;Eumetazoa;Bilateria;Coelomata;Deuterostomia;Chordata;Craniata;Vertebrata;Gnathostomata;Teleostomi;Euteleostomi;Sarcopterygii;Tetrapoda;Amniota;Mammalia;Theria;Eutheria;Euarchontoglires;Primates;Haplorrhini;Simiiformes;Catarrhini;Hominoidea;Hominidae;Homininae;Homo;Homo sapiens	51	3e-19	1	cellular organisms;Bacteria;Proteobacteria;Gammaproteobacteria;Enterobacteriales;Enterobacteriaceae;Enterobacter;Enterobacter cloacae complex;Enterobacter cloacae;Enterobacter cloacae SCF1	51	2e-14	ERR006347.sra.4788984	ERR006347	ERX001127	SRS000639	SRP000547	ERA000138	1000 Genomes CEPH (Utah residents with ancestry from Northern and Western Europe) population sequencing	NA12830	NA12830.22	1000G-mpimg-090515-4	CEU	2009-10-06	5770701	113151	WGS	low coverage	no	ILLUMINA	data/NA12830/sequence_read/ERR006347.filt.fastq.gz	MPIMG	PAIRED	Solexa 1G Genome Analyzer	GENOMIC	184
cellular organisms;Eukaryota;Opisthokonta;Metazoa;Eumetazoa;Bilateria;Coelomata;Deuterostomia;Chordata;Craniata;Vertebrata;Gnathostomata;Teleostomi;Euteleostomi;Sarcopterygii;Tetrapoda;Amniota;Mammalia;Theria;Eutheria;Euarchontoglires;Primates;Haplorrhini;Simiiformes;Catarrhini;Hominoidea;Hominidae;Homininae;Homo;Homo sapiens	51	8e-17	1	cellular organisms;Bacteria;Proteobacteria;Betaproteobacteria	51	5e-12	ERR006388.sra.10055740	ERR006388	ERX001146	SRS000640	SRP000547	ERA000144	1000 Genomes CEPH (Utah residents with ancestry from Northern and Western Europe) population sequencing	NA12842	NA12842.23	1000G-mpimg-090625-5	CEU	2009-10-06	64079256	1256456	WGS	low coverage	no	ILLUMINA	data/NA12842/sequence_read/ERR006388.filt.fastq.gz	MPIMG	PAIRED	Solexa 1G Genome Analyzer	GENOMIC	171
cellular organisms;Eukaryota;Opisthokonta;Metazoa;Eumetazoa;Bilateria;Coelomata;Deuterostomia;Chordata;Craniata;Vertebrata;Gnathostomata;Teleostomi;Euteleostomi;Sarcopterygii;Tetrapoda;Amniota;Mammalia;Theria;Eutheria;Euarchontoglires;Primates;Haplorrhini;Simiiformes;Catarrhini;Hominoidea;Hominidae;Homininae;Homo;Homo sapiens	51	8e-17	1	cellular organisms;Bacteria;Actinobacteria;Actinobacteria;Actinobacteridae;Actinomycetales;Propionibacterineae;Propionibacteriaceae;Propionibacterium;Propionibacterium acnes;Propionibacterium acnes ATCC 11828	51	3e-19	ERR006347.sra.1400620	ERR006347	ERX001127	SRS000639	SRP000547	ERA000138	1000 Genomes CEPH (Utah residents with ancestry from Northern and Western Europe) population sequencing	NA12830	NA12830.22	1000G-mpimg-090515-4	CEU	2009-10-06	5770701	113151	WGS	low coverage	no	ILLUMINA	data/NA12830/sequence_read/ERR006347.filt.fastq.gz	MPIMG	PAIRED	Solexa 1G Genome Analyzer	GENOMIC	184
cellular organisms;Eukaryota;Opisthokonta;Metazoa;Eumetazoa;Bilateria;Coelomata;Deuterostomia;Chordata;Craniata;Vertebrata;Gnathostomata;Teleostomi;Euteleostomi;Sarcopterygii;Tetrapoda;Amniota;Mammalia;Theria;Eutheria;Euarchontoglires;Primates;Haplorrhini;Simiiformes;Catarrhini;Hominoidea;Hominidae;Homininae;Homo;Homo sapiens	30	6e-07	1	cellular organisms;Bacteria;Actinobacteria;Actinobacteria;Actinobacteridae;Actinomycetales	30	6e-07	ERR006254.sra.1355328	ERR006254	ERX001088	SRS000642	SRP000547	ERA000125	1000 Genomes CEPH (Utah residents with ancestry from Northern and Western Europe) population sequencing	NA12889	NA12889.25	1000G-mpimg-090219-6	CEU	2009-10-06	7631820	211995	WGS	low coverage	no	ILLUMINA	data/NA12889/sequence_read/ERR006254.filt.fastq.gz	MPIMG	PAIRED	Solexa 1G Genome Analyzer	GENOMIC	167
cellular organisms;Eukaryota;Opisthokonta;Metazoa;Eumetazoa;Bilateria;Coelomata;Deuterostomia;Chordata;Craniata;Vertebrata;Gnathostomata;Teleostomi;Euteleostomi;Sarcopterygii;Tetrapoda;Amniota;Mammalia;Theria;Eutheria;Euarchontoglires;Primates;Haplorrhini;Simiiformes;Catarrhini;Hominoidea;Hominidae;Homininae;Homo;Homo sapiens	37	4e-11	1	cellular organisms;Bacteria;Actinobacteria;Actinobacteria;Actinobacteridae;Actinomycetales;Propionibacterineae;Propionibacteriaceae;Propionibacterium;Propionibacterium acnes	37	4e-11	ERR000132.sra.6073094	ERR000132	ERX000066	SRS000033	SRP000031	ERA000024	1000Genomes Project Pilot 1	NA07000	g1k-sc-NA07000-CEU-1	IL24_1051_1	CEU	2008-08-12	1053427	28471	WGS	low coverage	no	ILLUMINA	data/NA07000/sequence_read/ERR000132.filt.fastq.gz	SC	PAIRED	Solexa 1G Genome Analyzer	GENOMIC	175
cellular organisms;Eukaryota;Opisthokonta;Metazoa;Eumetazoa;Bilateria;Coelomata;Deuterostomia;Chordata;Craniata;Vertebrata;Gnathostomata;Teleostomi;Euteleostomi;Sarcopterygii;Tetrapoda;Amniota;Mammalia;Theria;Eutheria;Euarchontoglires;Primates;Haplorrhini;Simiiformes;Catarrhini;Hominoidea;Hominidae;Homininae;Homo;Homo sapiens	36	2e-10	1	cellular organisms;Bacteria;Proteobacteria;delta/epsilon subdivisions;Deltaproteobacteria;Desulfuromonadales;Pelobacteraceae;Pelobacter;Pelobacter propionicus;Pelobacter propionicus DSM 2379	36	9e-06	ERR006285.sra.3405507	ERR006285	ERX001106	SRS000643	SRP000547	ERA000129	1000 Genomes CEPH (Utah residents with ancestry from Northern and Western Europe) population sequencing	NA12890	NA12890.26	1000G-mpimg-090306-5	CEU	2009-10-06	48472812	1346467	WGS	low coverage	no	ILLUMINA	data/NA12890/sequence_read/ERR006285.filt.fastq.gz	MPIMG	PAIRED	Solexa 1G Genome Analyzer	GENOMIC	172
cellular organisms;Eukaryota;Opisthokonta;Metazoa;Eumetazoa;Bilateria;Coelomata;Deuterostomia;Chordata;Craniata;Vertebrata;Gnathostomata;Teleostomi;Euteleostomi;Sarcopterygii;Tetrapoda;Amniota;Mammalia;Theria;Eutheria;Euarchontoglires;Primates;Haplorrhini;Simiiformes;Catarrhini;Hominoidea;Hominidae;Homininae;Homo;Homo sapiens	51	2e-17	1	cellular organisms;Bacteria;Actinobacteria;Actinobacteria;Actinobacteridae;Actinomycetales;Propionibacterineae;Propionibacteriaceae;Propionibacterium;Propionibacterium acnes	51	3e-19	ERR006390.sra.2790017	ERR006390	ERX001146	SRS000640	SRP000547	ERA000144	1000 Genomes CEPH (Utah residents with ancestry from Northern and Western Europe) population sequencing	NA12842	NA12842.23	1000G-mpimg-090625-8	CEU	2009-10-06	100035786	1961486	WGS	low coverage	no	ILLUMINA	data/NA12842/sequence_read/ERR006390.filt.fastq.gz	MPIMG	PAIRED	Solexa 1G Genome Analyzer	GENOMIC	171
cellular organisms;Eukaryota;Opisthokonta;Metazoa;Eumetazoa;Bilateria;Coelomata;Deuterostomia;Chordata;Craniata;Vertebrata;Gnathostomata;Teleostomi;Euteleostomi;Sarcopterygii;Tetrapoda;Amniota;Mammalia;Theria;Eutheria;Euarchontoglires;Primates;Haplorrhini;Simiiformes;Catarrhini;Hominoidea;Hominidae;Homininae;Homo;Homo sapiens	36	2e-10	1	cellular organisms;Bacteria;Proteobacteria;Gammaproteobacteria;Enterobacteriales;Enterobacteriaceae;Yersinia;Yersinia pestis;Yersinia pestis Pestoides F	38	7e-07	ERR001043.sra.1148064	ERR001043	ERX000071	SRS000067	SRP000031	ERA000024	1000Genomes Project Pilot 1	NA12234	g1k-sc-NA12234-CEU-1	IL25_980_6	CEU	2008-08-12	751729	20317	WGS	low coverage	no	ILLUMINA	data/NA12234/sequence_read/ERR001043.filt.fastq.gz	SC	PAIRED	Solexa 1G Genome Analyzer	GENOMIC	175
cellular organisms;Eukaryota;Opisthokonta;Metazoa;Eumetazoa;Bilateria;Coelomata;Deuterostomia;Chordata;Craniata;Vertebrata;Gnathostomata;Teleostomi;Euteleostomi;Sarcopterygii;Tetrapoda;Amniota;Mammalia;Theria;Eutheria;Euarchontoglires;Primates;Haplorrhini;Simiiformes;Catarrhini;Hominoidea;Hominidae;Homininae;Homo;Homo sapiens	51	3e-19	2	cellular organisms;Bacteria;Proteobacteria;Gammaproteobacteria;Xanthomonadales;Xanthomonadaceae;Stenotrophomonas;Stenotrophomonas maltophilia group;Stenotrophomonas maltophilia;Stenotrophomonas maltophilia D457	51	8e-17	ERR006347.sra.6020126	ERR006347	ERX001127	SRS000639	SRP000547	ERA000138	1000 Genomes CEPH (Utah residents with ancestry from Northern and Western Europe) population sequencing	NA12830	NA12830.22	1000G-mpimg-090515-4	CEU	2009-10-06	5770701	113151	WGS	low coverage	no	ILLUMINA	data/NA12830/sequence_read/ERR006347.filt.fastq.gz	MPIMG	PAIRED	Solexa 1G Genome Analyzer	GENOMIC	184
cellular organisms;Eukaryota;Opisthokonta;Metazoa;Eumetazoa;Bilateria;Coelomata;Deuterostomia;Chordata;Craniata;Vertebrata;Gnathostomata;Teleostomi;Euteleostomi;Sarcopterygii;Tetrapoda;Amniota;Mammalia;Theria;Eutheria;Euarchontoglires;Primates;Haplorrhini;Simiiformes;Catarrhini;Hominoidea;Hominidae;Homininae;Homo;Homo sapiens	51	3e-19	1	cellular organisms;Bacteria;Actinobacteria;Actinobacteria;Actinobacteridae;Actinomycetales;Propionibacterineae;Propionibacteriaceae;Propionibacterium;Propionibacterium acnes	50	1e-18	ERR006390.sra.15000919	ERR006390	ERX001146	SRS000640	SRP000547	ERA000144	1000 Genomes CEPH (Utah residents with ancestry from Northern and Western Europe) population sequencing	NA12842	NA12842.23	1000G-mpimg-090625-8	CEU	2009-10-06	100035786	1961486	WGS	low coverage	no	ILLUMINA	data/NA12842/sequence_read/ERR006390.filt.fastq.gz	MPIMG	PAIRED	Solexa 1G Genome Analyzer	GENOMIC	171
cellular organisms;Eukaryota;Opisthokonta;Metazoa;Eumetazoa;Bilateria;Coelomata;Deuterostomia;Chordata;Craniata;Vertebrata;Gnathostomata;Teleostomi;Euteleostomi;Sarcopterygii;Tetrapoda;Amniota;Mammalia;Theria;Eutheria;Euarchontoglires;Primates;Haplorrhini;Simiiformes;Catarrhini;Hominoidea;Hominidae;Homininae;Homo;Homo sapiens	49	5e-18	2	cellular organisms;Bacteria;Actinobacteria;Actinobacteria;Actinobacteridae;Actinomycetales;Propionibacterineae;Propionibacteriaceae;Propionibacterium;Propionibacterium acnes	51	3e-19	ERR006366.sra.10714628	ERR006366	ERX001138	SRS000639	SRP000547	ERA000141	1000 Genomes CEPH (Utah residents with ancestry from Northern and Western Europe) population sequencing	NA12830	NA12830.22	1000G-mpimg-090608-1	CEU	2009-10-06	58676877	1150527	WGS	low coverage	no	ILLUMINA	data/NA12830/sequence_read/ERR006366.filt.fastq.gz	MPIMG	PAIRED	Solexa 1G Genome Analyzer	GENOMIC	145
cellular organisms;Eukaryota;Opisthokonta;Metazoa;Eumetazoa;Bilateria;Coelomata;Deuterostomia;Chordata;Craniata;Vertebrata;Gnathostomata;Teleostomi;Euteleostomi;Sarcopterygii;Tetrapoda;Amniota;Mammalia;Theria;Eutheria;Euarchontoglires;Primates;Haplorrhini;Simiiformes;Catarrhini;Hominoidea;Hominidae;Homininae;Homo;Homo sapiens	36	4e-08	1	cellular organisms;Bacteria;Proteobacteria;Gammaproteobacteria;Alteromonadales;Idiomarinaceae;Idiomarina;Idiomarina loihiensis;Idiomarina loihiensis L2TR	36	4e-08	ERR001805.sra.2724248	ERR001805	ERX000172	SRS000091	SRP000032	ERA000069	1000Genomes Project Pilot 2	NA12891	g1k-sc-NA12891-CEU-1	IL6_344_2	CEU	2008-12-15	3222216	89506	WGS	high coverage	no	ILLUMINA	data/NA12891/sequence_read/ERR001805.filt.fastq.gz	SC	PAIRED	Solexa 1G Genome Analyzer	GENOMIC	175
cellular organisms;Eukaryota;Opisthokonta;Metazoa;Eumetazoa;Bilateria;Coelomata;Deuterostomia;Chordata;Craniata;Vertebrata;Gnathostomata;Teleostomi;Euteleostomi;Sarcopterygii;Tetrapoda;Amniota;Mammalia;Theria;Eutheria;Euarchontoglires;Primates;Haplorrhini;Simiiformes;Catarrhini;Hominoidea;Hominidae;Homininae;Homo;Homo sapiens	51	5e-12	3	cellular organisms;Bacteria;Proteobacteria;Gammaproteobacteria;Enterobacteriales;Enterobacteriaceae;Pectobacterium;Pectobacterium atrosepticum;Pectobacterium atrosepticum SCRI1043	51	5e-12	ERR006347.sra.6764050	ERR006347	ERX001127	SRS000639	SRP000547	ERA000138	1000 Genomes CEPH (Utah residents with ancestry from Northern and Western Europe) population sequencing	NA12830	NA12830.22	1000G-mpimg-090515-4	CEU	2009-10-06	5770701	113151	WGS	low coverage	no	ILLUMINA	data/NA12830/sequence_read/ERR006347.filt.fastq.gz	MPIMG	PAIRED	Solexa 1G Genome Analyzer	GENOMIC	184
cellular organisms;Eukaryota;Opisthokonta;Metazoa;Eumetazoa;Bilateria;Coelomata;Deuterostomia;Chordata;Craniata;Vertebrata;Gnathostomata;Teleostomi;Euteleostomi;Sarcopterygii;Tetrapoda;Amniota;Mammalia;Theria;Eutheria;Euarchontoglires;Primates;Haplorrhini;Simiiformes;Catarrhini;Hominoidea;Hominidae;Homininae;Homo;Homo sapiens	51	3e-19	1	cellular organisms;Bacteria;Proteobacteria;Gammaproteobacteria;Xanthomonadales;Xanthomonadaceae;Stenotrophomonas;Stenotrophomonas maltophilia group;Stenotrophomonas maltophilia;Stenotrophomonas maltophilia K279a	47	5e-12	ERR006347.sra.8905872	ERR006347	ERX001127	SRS000639	SRP000547	ERA000138	1000 Genomes CEPH (Utah residents with ancestry from Northern and Western Europe) population sequencing	NA12830	NA12830.22	1000G-mpimg-090515-4	CEU	2009-10-06	5770701	113151	WGS	low coverage	no	ILLUMINA	data/NA12830/sequence_read/ERR006347.filt.fastq.gz	MPIMG	PAIRED	Solexa 1G Genome Analyzer	GENOMIC	184
cellular organisms;Eukaryota;Opisthokonta;Metazoa;Eumetazoa;Bilateria;Coelomata;Deuterostomia;Chordata;Craniata;Vertebrata;Gnathostomata;Teleostomi;Euteleostomi;Sarcopterygii;Tetrapoda;Amniota;Mammalia;Theria;Eutheria;Euarchontoglires;Primates;Haplorrhini;Simiiformes;Catarrhini;Hominoidea;Hominidae;Homininae;Homo;Homo sapiens	36	2e-10	1	cellular organisms;Bacteria;Proteobacteria;Betaproteobacteria;Burkholderiales;Comamonadaceae;Acidovorax	36	2e-10	ERR006230.sra.9515572	ERR006230	ERX001076	SRS000633	SRP000547	ERA000122	1000 Genomes CEPH (Utah residents with ancestry from Northern and Western Europe) population sequencing	NA12748	NA12748.19	1000G-mpimg-090121-6	CEU	2009-10-06	198771264	5521424	WGS	low coverage	no	ILLUMINA	data/NA12748/sequence_read/ERR006230.filt.fastq.gz	MPIMG	PAIRED	Solexa 1G Genome Analyzer	GENOMIC	165
cellular organisms;Eukaryota;Opisthokonta;Metazoa;Eumetazoa;Bilateria;Coelomata;Deuterostomia;Chordata;Craniata;Vertebrata;Gnathostomata;Teleostomi;Euteleostomi;Sarcopterygii;Tetrapoda;Amniota;Mammalia;Theria;Eutheria;Euarchontoglires;Primates;Haplorrhini;Simiiformes;Catarrhini;Hominoidea;Hominidae;Homininae;Homo;Homo sapiens	51	8e-17	1	cellular organisms;Bacteria;Proteobacteria;Gammaproteobacteria;Enterobacteriales;Enterobacteriaceae	51	8e-17	ERR006347.sra.10675221	ERR006347	ERX001127	SRS000639	SRP000547	ERA000138	1000 Genomes CEPH (Utah residents with ancestry from Northern and Western Europe) population sequencing	NA12830	NA12830.22	1000G-mpimg-090515-4	CEU	2009-10-06	5770701	113151	WGS	low coverage	no	ILLUMINA	data/NA12830/sequence_read/ERR006347.filt.fastq.gz	MPIMG	PAIRED	Solexa 1G Genome Analyzer	GENOMIC	184
cellular organisms;Eukaryota;Opisthokonta;Metazoa;Eumetazoa;Bilateria;Coelomata;Deuterostomia;Chordata;Craniata;Vertebrata;Gnathostomata;Teleostomi;Euteleostomi;Sarcopterygii;Tetrapoda;Amniota;Mammalia;Theria;Eutheria;Euarchontoglires;Primates;Haplorrhini;Simiiformes;Catarrhini;Hominoidea;Hominidae;Homininae;Homo;Homo sapiens	51	3e-19	2	cellular organisms;Bacteria;Proteobacteria;Gammaproteobacteria;Enterobacteriales;Enterobacteriaceae;Serratia	44	5e-15	ERR006347.sra.10407796	ERR006347	ERX001127	SRS000639	SRP000547	ERA000138	1000 Genomes CEPH (Utah residents with ancestry from Northern and Western Europe) population sequencing	NA12830	NA12830.22	1000G-mpimg-090515-4	CEU	2009-10-06	5770701	113151	WGS	low coverage	no	ILLUMINA	data/NA12830/sequence_read/ERR006347.filt.fastq.gz	MPIMG	PAIRED	Solexa 1G Genome Analyzer	GENOMIC	184
cellular organisms;Eukaryota;Opisthokonta;Metazoa;Eumetazoa;Bilateria;Coelomata;Deuterostomia;Chordata;Craniata;Vertebrata;Gnathostomata;Teleostomi;Euteleostomi;Sarcopterygii;Tetrapoda;Amniota;Mammalia;Theria;Eutheria;Euarchontoglires;Primates;Haplorrhini;Simiiformes;Catarrhini;Hominoidea;Hominidae;Homininae;Homo;Homo sapiens	51	3e-19	1	cellular organisms;Bacteria;Proteobacteria;Gammaproteobacteria;Enterobacteriales;Enterobacteriaceae;Edwardsiella;Edwardsiella ictaluri;Edwardsiella ictaluri 93-146	51	8e-17	ERR006345.sra.8711380	ERR006345	ERX001127	SRS000639	SRP000547	ERA000138	1000 Genomes CEPH (Utah residents with ancestry from Northern and Western Europe) population sequencing	NA12830	NA12830.22	1000G-mpimg-090515-1	CEU	2009-10-06	20819118	408218	WGS	low coverage	no	ILLUMINA	data/NA12830/sequence_read/ERR006345.filt.fastq.gz	MPIMG	PAIRED	Solexa 1G Genome Analyzer	GENOMIC	184
cellular organisms;Eukaryota;Opisthokonta;Metazoa;Eumetazoa;Bilateria;Coelomata;Deuterostomia;Chordata;Craniata;Vertebrata;Gnathostomata;Teleostomi;Euteleostomi;Sarcopterygii;Tetrapoda;Amniota;Mammalia;Theria;Eutheria;Euarchontoglires;Primates;Haplorrhini;Simiiformes;Catarrhini;Hominoidea;Hominidae;Homininae;Homo;Homo sapiens	51	3e-19	1	cellular organisms;Bacteria;Proteobacteria;Gammaproteobacteria;Enterobacteriales;Enterobacteriaceae;Serratia	51	8e-17	ERR006345.sra.7329614	ERR006345	ERX001127	SRS000639	SRP000547	ERA000138	1000 Genomes CEPH (Utah residents with ancestry from Northern and Western Europe) population sequencing	NA12830	NA12830.22	1000G-mpimg-090515-1	CEU	2009-10-06	20819118	408218	WGS	low coverage	no	ILLUMINA	data/NA12830/sequence_read/ERR006345.filt.fastq.gz	MPIMG	PAIRED	Solexa 1G Genome Analyzer	GENOMIC	184
cellular organisms;Eukaryota;Opisthokonta;Metazoa;Eumetazoa;Bilateria;Coelomata;Deuterostomia;Chordata;Craniata;Vertebrata;Gnathostomata;Teleostomi;Euteleostomi;Sarcopterygii;Tetrapoda;Amniota;Mammalia;Theria;Eutheria;Euarchontoglires;Primates;Haplorrhini;Simiiformes;Catarrhini;Hominoidea;Hominidae;Homininae;Homo;Homo sapiens	51	3e-19	1	cellular organisms;Bacteria;Proteobacteria;Gammaproteobacteria;Xanthomonadales;Xanthomonadaceae;Stenotrophomonas;Stenotrophomonas maltophilia group;Stenotrophomonas maltophilia;Stenotrophomonas maltophilia R551-3	51	2e-14	ERR006345.sra.4933242	ERR006345	ERX001127	SRS000639	SRP000547	ERA000138	1000 Genomes CEPH (Utah residents with ancestry from Northern and Western Europe) population sequencing	NA12830	NA12830.22	1000G-mpimg-090515-1	CEU	2009-10-06	20819118	408218	WGS	low coverage	no	ILLUMINA	data/NA12830/sequence_read/ERR006345.filt.fastq.gz	MPIMG	PAIRED	Solexa 1G Genome Analyzer	GENOMIC	184
cellular organisms;Eukaryota;Opisthokonta;Metazoa;Eumetazoa;Bilateria;Coelomata;Deuterostomia;Chordata;Craniata;Vertebrata;Gnathostomata;Teleostomi;Euteleostomi;Sarcopterygii;Tetrapoda;Amniota;Mammalia;Theria;Eutheria;Euarchontoglires;Primates;Haplorrhini;Simiiformes;Catarrhini;Hominoidea;Hominidae;Homininae;Homo;Homo sapiens	51	3e-19	1	cellular organisms;Bacteria;Proteobacteria;Gammaproteobacteria;Xanthomonadales;Xanthomonadaceae;Stenotrophomonas;Stenotrophomonas maltophilia group;Stenotrophomonas maltophilia	51	3e-19	ERR006356.sra.938435	ERR006356	ERX001132	SRS000639	SRP000547	ERA000139	1000 Genomes CEPH (Utah residents with ancestry from Northern and Western Europe) population sequencing	NA12830	NA12830.22	1000G-mpimg-090522-5	CEU	2009-10-15	32761380	642380	WGS	low coverage	no	ILLUMINA	data/NA12830/sequence_read/ERR006356.filt.fastq.gz	MPIMG	PAIRED	Solexa 1G Genome Analyzer	GENOMIC	164
cellular organisms;Eukaryota;Opisthokonta;Metazoa;Eumetazoa;Bilateria;Coelomata;Deuterostomia;Chordata;Craniata;Vertebrata;Gnathostomata;Teleostomi;Euteleostomi;Sarcopterygii;Tetrapoda;Amniota;Mammalia;Theria;Eutheria;Euarchontoglires;Primates;Haplorrhini;Simiiformes;Catarrhini;Hominoidea;Hominidae;Homininae;Homo;Homo sapiens	36	2e-10	1	cellular organisms;Bacteria;Proteobacteria;Gammaproteobacteria;Pseudomonadales;Moraxellaceae;Acinetobacter;Acinetobacter calcoaceticus/baumannii complex;Acinetobacter baumannii	36	4e-08	ERR006243.sra.1065763	ERR006243	ERX001084	SRS000633	SRP000547	ERA000124	1000 Genomes CEPH (Utah residents with ancestry from Northern and Western Europe) population sequencing	NA12748	NA12748.19	1000G-mpimg-090210-3	CEU	2009-10-06	8339616	231656	WGS	low coverage	no	ILLUMINA	data/NA12748/sequence_read/ERR006243.filt.fastq.gz	MPIMG	PAIRED	Solexa 1G Genome Analyzer	GENOMIC	143
cellular organisms;Eukaryota;Opisthokonta;Metazoa;Eumetazoa;Bilateria;Coelomata;Deuterostomia;Chordata;Craniata;Vertebrata;Gnathostomata;Teleostomi;Euteleostomi;Sarcopterygii;Tetrapoda;Amniota;Mammalia;Theria;Eutheria;Euarchontoglires;Primates;Haplorrhini;Simiiformes;Catarrhini;Hominoidea;Hominidae;Homininae;Homo;Homo sapiens	51	3e-19	1	cellular organisms;Bacteria;Proteobacteria;Gammaproteobacteria;Xanthomonadales;Xanthomonadaceae;Stenotrophomonas;Stenotrophomonas maltophilia group;Stenotrophomonas maltophilia;Stenotrophomonas maltophilia K279a	51	8e-17	ERR006347.sra.8100226	ERR006347	ERX001127	SRS000639	SRP000547	ERA000138	1000 Genomes CEPH (Utah residents with ancestry from Northern and Western Europe) population sequencing	NA12830	NA12830.22	1000G-mpimg-090515-4	CEU	2009-10-06	5770701	113151	WGS	low coverage	no	ILLUMINA	data/NA12830/sequence_read/ERR006347.filt.fastq.gz	MPIMG	PAIRED	Solexa 1G Genome Analyzer	GENOMIC	184
cellular organisms;Eukaryota;Opisthokonta;Metazoa;Eumetazoa;Bilateria;Coelomata;Deuterostomia;Chordata;Craniata;Vertebrata;Gnathostomata;Teleostomi;Euteleostomi;Sarcopterygii;Tetrapoda;Amniota;Mammalia;Theria;Eutheria;Euarchontoglires;Primates;Haplorrhini;Simiiformes;Catarrhini;Hominoidea;Hominidae;Homininae;Homo;Homo sapiens	51	3e-19	1	cellular organisms;Bacteria;Proteobacteria;Gammaproteobacteria;Xanthomonadales;Xanthomonadaceae;Stenotrophomonas;Stenotrophomonas maltophilia group;Stenotrophomonas maltophilia	51	2e-14	ERR006347.sra.2243662	ERR006347	ERX001127	SRS000639	SRP000547	ERA000138	1000 Genomes CEPH (Utah residents with ancestry from Northern and Western Europe) population sequencing	NA12830	NA12830.22	1000G-mpimg-090515-4	CEU	2009-10-06	5770701	113151	WGS	low coverage	no	ILLUMINA	data/NA12830/sequence_read/ERR006347.filt.fastq.gz	MPIMG	PAIRED	Solexa 1G Genome Analyzer	GENOMIC	184
cellular organisms;Eukaryota;Opisthokonta;Metazoa;Eumetazoa;Bilateria;Coelomata;Deuterostomia;Chordata;Craniata;Vertebrata;Gnathostomata;Teleostomi;Euteleostomi;Sarcopterygii;Tetrapoda;Amniota;Mammalia;Theria;Eutheria;Euarchontoglires;Primates;Haplorrhini;Simiiformes;Catarrhini;Hominoidea;Hominidae;Homininae;Homo;Homo sapiens	51	2e-14	1	cellular organisms;Bacteria;Proteobacteria;Gammaproteobacteria;Xanthomonadales;Xanthomonadaceae;Stenotrophomonas;Stenotrophomonas maltophilia group;Stenotrophomonas maltophilia	51	8e-17	ERR006346.sra.12885962	ERR006346	ERX001127	SRS000639	SRP000547	ERA000138	1000 Genomes CEPH (Utah residents with ancestry from Northern and Western Europe) population sequencing	NA12830	NA12830.22	1000G-mpimg-090515-2	CEU	2009-10-06	10555929	206979	WGS	low coverage	no	ILLUMINA	data/NA12830/sequence_read/ERR006346.filt.fastq.gz	MPIMG	PAIRED	Solexa 1G Genome Analyzer	GENOMIC	184
cellular organisms;Eukaryota;Opisthokonta;Metazoa;Eumetazoa;Bilateria;Coelomata;Deuterostomia;Chordata;Craniata;Vertebrata;Gnathostomata;Teleostomi;Euteleostomi;Sarcopterygii;Tetrapoda;Amniota;Mammalia;Theria;Eutheria;Euarchontoglires;Primates;Haplorrhini;Simiiformes;Catarrhini;Hominoidea;Hominidae;Homininae;Homo;Homo sapiens	51	3e-19	1	cellular organisms;Bacteria;Actinobacteria;Actinobacteria;Actinobacteridae;Actinomycetales;Propionibacterineae;Propionibacteriaceae;Propionibacterium;Propionibacterium acnes	51	3e-19	ERR006345.sra.4284750	ERR006345	ERX001127	SRS000639	SRP000547	ERA000138	1000 Genomes CEPH (Utah residents with ancestry from Northern and Western Europe) population sequencing	NA12830	NA12830.22	1000G-mpimg-090515-1	CEU	2009-10-06	20819118	408218	WGS	low coverage	no	ILLUMINA	data/NA12830/sequence_read/ERR006345.filt.fastq.gz	MPIMG	PAIRED	Solexa 1G Genome Analyzer	GENOMIC	184
cellular organisms;Eukaryota;Opisthokonta;Metazoa;Eumetazoa;Bilateria;Coelomata;Deuterostomia;Chordata;Craniata;Vertebrata;Gnathostomata;Teleostomi;Euteleostomi;Sarcopterygii;Tetrapoda;Amniota;Mammalia;Theria;Eutheria;Euarchontoglires;Primates;Haplorrhini;Simiiformes;Catarrhini;Hominoidea;Hominidae;Homininae;Homo;Homo sapiens	46	3e-16	1	cellular organisms;Bacteria;Proteobacteria;Gammaproteobacteria;Enterobacteriales;Enterobacteriaceae;Serratia;Serratia proteamaculans;Serratia proteamaculans 568	47	5e-12	ERR006390.sra.4651454	ERR006390	ERX001146	SRS000640	SRP000547	ERA000144	1000 Genomes CEPH (Utah residents with ancestry from Northern and Western Europe) population sequencing	NA12842	NA12842.23	1000G-mpimg-090625-8	CEU	2009-10-06	100035786	1961486	WGS	low coverage	no	ILLUMINA	data/NA12842/sequence_read/ERR006390.filt.fastq.gz	MPIMG	PAIRED	Solexa 1G Genome Analyzer	GENOMIC	171
cellular organisms;Eukaryota;Opisthokonta;Metazoa;Eumetazoa;Bilateria;Coelomata;Deuterostomia;Chordata;Craniata;Vertebrata;Gnathostomata;Teleostomi;Euteleostomi;Sarcopterygii;Tetrapoda;Amniota;Mammalia;Theria;Eutheria;Euarchontoglires;Primates;Haplorrhini;Simiiformes;Catarrhini;Hominoidea;Hominidae;Homininae;Homo;Homo sapiens	51	3e-19	1	cellular organisms;Bacteria;Proteobacteria;Gammaproteobacteria;Xanthomonadales;Xanthomonadaceae;Stenotrophomonas;Stenotrophomonas maltophilia group;Stenotrophomonas maltophilia	51	3e-19	ERR006345.sra.8349526	ERR006345	ERX001127	SRS000639	SRP000547	ERA000138	1000 Genomes CEPH (Utah residents with ancestry from Northern and Western Europe) population sequencing	NA12830	NA12830.22	1000G-mpimg-090515-1	CEU	2009-10-06	20819118	408218	WGS	low coverage	no	ILLUMINA	data/NA12830/sequence_read/ERR006345.filt.fastq.gz	MPIMG	PAIRED	Solexa 1G Genome Analyzer	GENOMIC	184
cellular organisms;Eukaryota;Opisthokonta;Metazoa;Eumetazoa;Bilateria;Coelomata;Deuterostomia;Chordata;Craniata;Vertebrata;Gnathostomata;Teleostomi;Euteleostomi;Sarcopterygii;Tetrapoda;Amniota;Mammalia;Theria;Eutheria;Euarchontoglires;Primates;Haplorrhini;Simiiformes;Catarrhini;Hominoidea;Hominidae;Homininae;Homo;Homo sapiens	51	3e-19	2	cellular organisms;Bacteria;Proteobacteria;Gammaproteobacteria;Xanthomonadales;Xanthomonadaceae;Stenotrophomonas;Stenotrophomonas maltophilia group;Stenotrophomonas maltophilia	50	8e-14	ERR006347.sra.5050952	ERR006347	ERX001127	SRS000639	SRP000547	ERA000138	1000 Genomes CEPH (Utah residents with ancestry from Northern and Western Europe) population sequencing	NA12830	NA12830.22	1000G-mpimg-090515-4	CEU	2009-10-06	5770701	113151	WGS	low coverage	no	ILLUMINA	data/NA12830/sequence_read/ERR006347.filt.fastq.gz	MPIMG	PAIRED	Solexa 1G Genome Analyzer	GENOMIC	184
cellular organisms;Eukaryota;Opisthokonta;Metazoa;Eumetazoa;Bilateria;Coelomata;Deuterostomia;Chordata;Craniata;Vertebrata;Gnathostomata;Teleostomi;Euteleostomi;Sarcopterygii;Tetrapoda;Amniota;Mammalia;Theria;Eutheria;Euarchontoglires;Primates;Haplorrhini;Simiiformes;Catarrhini;Hominoidea;Hominidae;Homininae;Homo;Homo sapiens	51	3e-19	1	cellular organisms;Bacteria;Actinobacteria;Actinobacteria;Actinobacteridae;Actinomycetales;Propionibacterineae;Propionibacteriaceae;Propionibacterium;Propionibacterium acnes	51	3e-19	ERR006347.sra.7330124	ERR006347	ERX001127	SRS000639	SRP000547	ERA000138	1000 Genomes CEPH (Utah residents with ancestry from Northern and Western Europe) population sequencing	NA12830	NA12830.22	1000G-mpimg-090515-4	CEU	2009-10-06	5770701	113151	WGS	low coverage	no	ILLUMINA	data/NA12830/sequence_read/ERR006347.filt.fastq.gz	MPIMG	PAIRED	Solexa 1G Genome Analyzer	GENOMIC	184
cellular organisms;Eukaryota;Opisthokonta;Metazoa;Eumetazoa;Bilateria;Coelomata;Deuterostomia;Chordata;Craniata;Vertebrata;Gnathostomata;Teleostomi;Euteleostomi;Sarcopterygii;Tetrapoda;Amniota;Mammalia;Theria;Eutheria;Euarchontoglires;Primates;Haplorrhini;Simiiformes;Catarrhini;Hominoidea;Hominidae;Homininae;Homo;Homo sapiens	51	3e-19	1	cellular organisms;Bacteria;Actinobacteria;Actinobacteria;Actinobacteridae;Actinomycetales;Propionibacterineae;Propionibacteriaceae;Propionibacterium;Propionibacterium acnes	51	3e-19	ERR006345.sra.8369051	ERR006345	ERX001127	SRS000639	SRP000547	ERA000138	1000 Genomes CEPH (Utah residents with ancestry from Northern and Western Europe) population sequencing	NA12830	NA12830.22	1000G-mpimg-090515-1	CEU	2009-10-06	20819118	408218	WGS	low coverage	no	ILLUMINA	data/NA12830/sequence_read/ERR006345.filt.fastq.gz	MPIMG	PAIRED	Solexa 1G Genome Analyzer	GENOMIC	184
cellular organisms;Eukaryota;Opisthokonta;Metazoa;Eumetazoa;Bilateria;Coelomata;Deuterostomia;Chordata;Craniata;Vertebrata;Gnathostomata;Teleostomi;Euteleostomi;Sarcopterygii;Tetrapoda;Amniota;Mammalia;Theria;Eutheria;Euarchontoglires;Primates;Haplorrhini;Simiiformes;Catarrhini;Hominoidea;Hominidae;Homininae;Homo;Homo sapiens	51	3e-19	1	cellular organisms;Bacteria;Proteobacteria;Gammaproteobacteria	49	5e-18	ERR006415.sra.6792353	ERR006415	ERX001154	SRS001262	SRP000547	ERA000148	1000 Genomes CEPH (Utah residents with ancestry from Northern and Western Europe) population sequencing	NA11933	NA11933.14	1000G-mpimg-090729-6	CEU	2009-10-07	34452438	675538	WGS	low coverage	no	ILLUMINA	data/NA11933/sequence_read/ERR006415.filt.fastq.gz	MPIMG	PAIRED	Solexa 1G Genome Analyzer	GENOMIC	211
cellular organisms;Eukaryota;Opisthokonta;Metazoa;Eumetazoa;Bilateria;Coelomata;Deuterostomia;Chordata;Craniata;Vertebrata;Gnathostomata;Teleostomi;Euteleostomi;Sarcopterygii;Tetrapoda;Amniota;Mammalia;Theria;Eutheria;Euarchontoglires;Primates;Haplorrhini;Simiiformes;Catarrhini	51	3e-19	1	cellular organisms;Bacteria;Proteobacteria;Gammaproteobacteria;Xanthomonadales;Xanthomonadaceae;Stenotrophomonas;Stenotrophomonas maltophilia group;Stenotrophomonas maltophilia;Stenotrophomonas maltophilia R551-3	51	5e-12	ERR006345.sra.4498472	ERR006345	ERX001127	SRS000639	SRP000547	ERA000138	1000 Genomes CEPH (Utah residents with ancestry from Northern and Western Europe) population sequencing	NA12830	NA12830.22	1000G-mpimg-090515-1	CEU	2009-10-06	20819118	408218	WGS	low coverage	no	ILLUMINA	data/NA12830/sequence_read/ERR006345.filt.fastq.gz	MPIMG	PAIRED	Solexa 1G Genome Analyzer	GENOMIC	184
cellular organisms;Eukaryota;Opisthokonta;Metazoa;Eumetazoa;Bilateria;Coelomata;Deuterostomia;Chordata;Craniata;Vertebrata;Gnathostomata;Teleostomi;Euteleostomi;Sarcopterygii;Tetrapoda;Amniota;Mammalia;Theria;Eutheria;Euarchontoglires;Primates;Haplorrhini;Simiiformes;Catarrhini;Hominoidea;Hominidae;Homininae;Homo;Homo sapiens	51	3e-19	1	cellular organisms;Bacteria;Proteobacteria;Betaproteobacteria;Burkholderiales;Comamonadaceae;Acidovorax	48	2e-17	ERR006385.sra.21225954	ERR006385	ERX001146	SRS000640	SRP000547	ERA000144	1000 Genomes CEPH (Utah residents with ancestry from Northern and Western Europe) population sequencing	NA12842	NA12842.23	1000G-mpimg-090625-2	CEU	2009-10-06	115762554	2269854	WGS	low coverage	no	ILLUMINA	data/NA12842/sequence_read/ERR006385.filt.fastq.gz	MPIMG	PAIRED	Solexa 1G Genome Analyzer	GENOMIC	171
cellular organisms;Eukaryota;Opisthokonta;Metazoa;Eumetazoa;Bilateria;Coelomata;Deuterostomia;Chordata;Craniata;Vertebrata;Gnathostomata;Teleostomi;Euteleostomi;Sarcopterygii;Tetrapoda;Amniota;Mammalia;Theria;Eutheria;Euarchontoglires;Primates;Haplorrhini;Simiiformes;Catarrhini;Hominoidea;Hominidae;Homininae;Homo;Homo sapiens	51	3e-19	1	cellular organisms;Bacteria;Proteobacteria;Gammaproteobacteria;Xanthomonadales;Xanthomonadaceae;Stenotrophomonas;Stenotrophomonas maltophilia group;Stenotrophomonas maltophilia;Stenotrophomonas maltophilia JV3	51	8e-17	ERR006347.sra.7418173	ERR006347	ERX001127	SRS000639	SRP000547	ERA000138	1000 Genomes CEPH (Utah residents with ancestry from Northern and Western Europe) population sequencing	NA12830	NA12830.22	1000G-mpimg-090515-4	CEU	2009-10-06	5770701	113151	WGS	low coverage	no	ILLUMINA	data/NA12830/sequence_read/ERR006347.filt.fastq.gz	MPIMG	PAIRED	Solexa 1G Genome Analyzer	GENOMIC	184
cellular organisms;Eukaryota;Opisthokonta;Metazoa;Eumetazoa;Bilateria;Coelomata;Deuterostomia;Chordata;Craniata;Vertebrata;Gnathostomata;Teleostomi;Euteleostomi;Sarcopterygii;Tetrapoda;Amniota;Mammalia;Theria;Eutheria;Euarchontoglires;Primates;Haplorrhini;Simiiformes;Catarrhini;Hominoidea;Hominidae;Homininae;Homo;Homo sapiens	51	3e-19	1	cellular organisms;Bacteria;Proteobacteria;Gammaproteobacteria;Enterobacteriales;Enterobacteriaceae;Dickeya;Dickeya dadantii;Dickeya dadantii 3937	50	8e-14	ERR006388.sra.2137380	ERR006388	ERX001146	SRS000640	SRP000547	ERA000144	1000 Genomes CEPH (Utah residents with ancestry from Northern and Western Europe) population sequencing	NA12842	NA12842.23	1000G-mpimg-090625-5	CEU	2009-10-06	64079256	1256456	WGS	low coverage	no	ILLUMINA	data/NA12842/sequence_read/ERR006388.filt.fastq.gz	MPIMG	PAIRED	Solexa 1G Genome Analyzer	GENOMIC	171
cellular organisms;Eukaryota;Opisthokonta;Metazoa;Eumetazoa;Bilateria;Coelomata;Deuterostomia;Chordata;Craniata;Vertebrata;Gnathostomata;Teleostomi;Euteleostomi;Sarcopterygii;Tetrapoda;Amniota;Mammalia;Theria;Eutheria;Euarchontoglires;Primates;Haplorrhini;Simiiformes;Catarrhini;Hominoidea;Hominidae;Homininae;Homo;Homo sapiens	51	3e-19	1	cellular organisms;Bacteria;Proteobacteria;Gammaproteobacteria;Enterobacteriales;Enterobacteriaceae	51	3e-19	ERR006366.sra.13884643	ERR006366	ERX001138	SRS000639	SRP000547	ERA000141	1000 Genomes CEPH (Utah residents with ancestry from Northern and Western Europe) population sequencing	NA12830	NA12830.22	1000G-mpimg-090608-1	CEU	2009-10-06	58676877	1150527	WGS	low coverage	no	ILLUMINA	data/NA12830/sequence_read/ERR006366.filt.fastq.gz	MPIMG	PAIRED	Solexa 1G Genome Analyzer	GENOMIC	145
cellular organisms;Eukaryota;Opisthokonta;Metazoa;Eumetazoa;Bilateria;Coelomata;Deuterostomia;Chordata;Craniata;Vertebrata;Gnathostomata;Teleostomi;Euteleostomi;Sarcopterygii;Tetrapoda;Amniota;Mammalia;Theria;Eutheria;Euarchontoglires;Primates;Haplorrhini;Simiiformes;Catarrhini;Hominoidea;Hominidae;Homininae;Homo;Homo sapiens	51	2e-14	2	cellular organisms;Bacteria;Proteobacteria;Gammaproteobacteria;Enterobacteriales;Enterobacteriaceae;Klebsiella;Klebsiella pneumoniae;Klebsiella pneumoniae 342	51	2e-14	ERR006355.sra.7425675	ERR006355	ERX001132	SRS000639	SRP000547	ERA000139	1000 Genomes CEPH (Utah residents with ancestry from Northern and Western Europe) population sequencing	NA12830	NA12830.22	1000G-mpimg-090522-4	CEU	2009-10-15	66968202	1313102	WGS	low coverage	no	ILLUMINA	data/NA12830/sequence_read/ERR006355.filt.fastq.gz	MPIMG	PAIRED	Solexa 1G Genome Analyzer	GENOMIC	164
cellular organisms;Eukaryota;Opisthokonta;Metazoa;Eumetazoa;Bilateria;Coelomata;Deuterostomia;Chordata;Craniata;Vertebrata;Gnathostomata;Teleostomi;Euteleostomi;Sarcopterygii;Tetrapoda;Amniota;Mammalia;Theria;Eutheria;Euarchontoglires;Primates;Haplorrhini;Simiiformes;Catarrhini;Hominoidea;Hominidae;Homininae;Homo;Homo sapiens	51	3e-19	1	cellular organisms;Bacteria;Proteobacteria;Gammaproteobacteria;Xanthomonadales;Xanthomonadaceae;Stenotrophomonas;Stenotrophomonas maltophilia group;Stenotrophomonas maltophilia	51	8e-17	ERR006345.sra.5091152	ERR006345	ERX001127	SRS000639	SRP000547	ERA000138	1000 Genomes CEPH (Utah residents with ancestry from Northern and Western Europe) population sequencing	NA12830	NA12830.22	1000G-mpimg-090515-1	CEU	2009-10-06	20819118	408218	WGS	low coverage	no	ILLUMINA	data/NA12830/sequence_read/ERR006345.filt.fastq.gz	MPIMG	PAIRED	Solexa 1G Genome Analyzer	GENOMIC	184
cellular organisms;Eukaryota;Opisthokonta;Metazoa;Eumetazoa;Bilateria;Coelomata;Deuterostomia;Chordata;Craniata;Vertebrata;Gnathostomata;Teleostomi;Euteleostomi;Sarcopterygii;Tetrapoda;Amniota;Mammalia;Theria;Eutheria;Euarchontoglires;Primates;Haplorrhini;Simiiformes;Catarrhini;Hominoidea;Hominidae;Homininae;Homo;Homo sapiens	51	3e-19	1	cellular organisms;Bacteria;Proteobacteria;Gammaproteobacteria;Enterobacteriales;Enterobacteriaceae	51	8e-17	ERR006347.sra.3731019	ERR006347	ERX001127	SRS000639	SRP000547	ERA000138	1000 Genomes CEPH (Utah residents with ancestry from Northern and Western Europe) population sequencing	NA12830	NA12830.22	1000G-mpimg-090515-4	CEU	2009-10-06	5770701	113151	WGS	low coverage	no	ILLUMINA	data/NA12830/sequence_read/ERR006347.filt.fastq.gz	MPIMG	PAIRED	Solexa 1G Genome Analyzer	GENOMIC	184
cellular organisms;Eukaryota;Opisthokonta;Metazoa;Eumetazoa;Bilateria;Coelomata;Deuterostomia;Chordata;Craniata;Vertebrata;Gnathostomata;Teleostomi;Euteleostomi;Sarcopterygii;Tetrapoda;Amniota;Mammalia;Theria;Eutheria;Euarchontoglires;Primates;Haplorrhini;Simiiformes;Catarrhini;Hominoidea;Hominidae;Homininae;Homo;Homo sapiens	36	2e-10	1	cellular organisms;Bacteria;Actinobacteria;Actinobacteria;Actinobacteridae;Actinomycetales;Propionibacterineae;Propionibacteriaceae;Propionibacterium;Propionibacterium acnes	36	2e-10	ERR001863.sra.1770516	ERR001863	ERX000174	SRS000092	SRP000032	ERA000070	1000Genomes Project Pilot 2	NA12892	g1k-sc-NA12892-CEU-1	IL20_325_2	CEU	2008-12-15	431244	11979	WGS	high coverage	no	ILLUMINA	data/NA12892/sequence_read/ERR001863.filt.fastq.gz	SC	PAIRED	Solexa 1G Genome Analyzer	GENOMIC	175
cellular organisms;Eukaryota;Opisthokonta;Metazoa;Eumetazoa;Bilateria;Coelomata;Deuterostomia;Chordata;Craniata;Vertebrata;Gnathostomata;Teleostomi;Euteleostomi;Sarcopterygii;Tetrapoda;Amniota;Mammalia;Theria;Eutheria;Euarchontoglires;Primates;Haplorrhini;Simiiformes;Catarrhini;Hominoidea;Hominidae;Homininae;Homo;Homo sapiens	51	8e-17	2	cellular organisms;Bacteria;Proteobacteria;Gammaproteobacteria;Xanthomonadales;Xanthomonadaceae;Stenotrophomonas;Stenotrophomonas maltophilia group;Stenotrophomonas maltophilia;Stenotrophomonas maltophilia D457	51	8e-17	ERR006355.sra.6549804	ERR006355	ERX001132	SRS000639	SRP000547	ERA000139	1000 Genomes CEPH (Utah residents with ancestry from Northern and Western Europe) population sequencing	NA12830	NA12830.22	1000G-mpimg-090522-4	CEU	2009-10-15	66968202	1313102	WGS	low coverage	no	ILLUMINA	data/NA12830/sequence_read/ERR006355.filt.fastq.gz	MPIMG	PAIRED	Solexa 1G Genome Analyzer	GENOMIC	164
cellular organisms;Eukaryota;Opisthokonta;Metazoa;Eumetazoa;Bilateria;Coelomata;Deuterostomia;Chordata;Craniata;Vertebrata;Gnathostomata;Teleostomi;Euteleostomi;Sarcopterygii;Tetrapoda;Amniota;Mammalia;Theria;Eutheria;Euarchontoglires;Primates;Haplorrhini;Simiiformes;Catarrhini;Hominoidea;Hominidae;Homininae;Homo;Homo sapiens	51	3e-19	2	cellular organisms;Bacteria;Proteobacteria;Gammaproteobacteria;Xanthomonadales;Xanthomonadaceae;Stenotrophomonas;Stenotrophomonas maltophilia group;Stenotrophomonas maltophilia	51	2e-14	ERR006345.sra.2511188	ERR006345	ERX001127	SRS000639	SRP000547	ERA000138	1000 Genomes CEPH (Utah residents with ancestry from Northern and Western Europe) population sequencing	NA12830	NA12830.22	1000G-mpimg-090515-1	CEU	2009-10-06	20819118	408218	WGS	low coverage	no	ILLUMINA	data/NA12830/sequence_read/ERR006345.filt.fastq.gz	MPIMG	PAIRED	Solexa 1G Genome Analyzer	GENOMIC	184
cellular organisms;Eukaryota;Opisthokonta;Metazoa;Eumetazoa;Bilateria;Coelomata;Deuterostomia;Chordata;Craniata;Vertebrata;Gnathostomata;Teleostomi;Euteleostomi;Sarcopterygii;Tetrapoda;Amniota;Mammalia;Theria;Eutheria;Euarchontoglires;Primates;Haplorrhini;Simiiformes;Catarrhini;Hominoidea;Hominidae;Homininae;Homo;Homo sapiens	51	3e-19	1	cellular organisms;Bacteria;Actinobacteria;Actinobacteria;Actinobacteridae;Actinomycetales;Propionibacterineae;Propionibacteriaceae;Propionibacterium;Propionibacterium acnes	50	1e-18	ERR006345.sra.2847319	ERR006345	ERX001127	SRS000639	SRP000547	ERA000138	1000 Genomes CEPH (Utah residents with ancestry from Northern and Western Europe) population sequencing	NA12830	NA12830.22	1000G-mpimg-090515-1	CEU	2009-10-06	20819118	408218	WGS	low coverage	no	ILLUMINA	data/NA12830/sequence_read/ERR006345.filt.fastq.gz	MPIMG	PAIRED	Solexa 1G Genome Analyzer	GENOMIC	184
cellular organisms;Eukaryota;Opisthokonta;Metazoa;Eumetazoa;Bilateria;Coelomata;Deuterostomia;Chordata;Craniata;Vertebrata;Gnathostomata;Teleostomi;Euteleostomi;Sarcopterygii;Tetrapoda;Amniota;Mammalia;Theria;Eutheria;Euarchontoglires	36	2e-10	1	cellular organisms;Bacteria;Actinobacteria;Actinobacteria;Actinobacteridae;Actinomycetales;Propionibacterineae;Propionibacteriaceae;Propionibacterium;Propionibacterium acnes	36	2e-10	ERR000965.sra.3141205	ERR000965	ERX000071	SRS000067	SRP000031	ERA000024	1000Genomes Project Pilot 1	NA12234	g1k-sc-NA12234-CEU-1	IL13_981_1	CEU	2008-08-12	12905928	358498	WGS	low coverage	no	ILLUMINA	data/NA12234/sequence_read/ERR000965.filt.fastq.gz	SC	PAIRED	Solexa 1G Genome Analyzer	GENOMIC	175
cellular organisms;Eukaryota;Opisthokonta;Metazoa;Eumetazoa;Bilateria;Coelomata;Deuterostomia;Chordata;Craniata;Vertebrata;Gnathostomata;Teleostomi;Euteleostomi;Sarcopterygii;Tetrapoda;Amniota;Mammalia;Theria;Eutheria;Euarchontoglires;Primates;Haplorrhini;Simiiformes;Catarrhini;Hominoidea;Hominidae;Homininae;Homo;Homo sapiens	35	6e-10	1	cellular organisms;Bacteria;Spirochaetes;Spirochaetia;Spirochaetales;Brachyspiraceae;Brachyspira;Brachyspira pilosicoli;Brachyspira pilosicoli 95/1000	36	9e-06	ERR006266.sra.365729	ERR006266	ERX001095	SRS000641	SRP000547	ERA000127	1000 Genomes CEPH (Utah residents with ancestry from Northern and Western Europe) population sequencing	NA12843	NA12843.24	1000G-mpimg-090224-2	CEU	2009-10-06	23094324	641509	WGS	low coverage	no	ILLUMINA	data/NA12843/sequence_read/ERR006266.filt.fastq.gz	MPIMG	PAIRED	Solexa 1G Genome Analyzer	GENOMIC	167
cellular organisms;Eukaryota;Opisthokonta;Metazoa;Eumetazoa;Bilateria;Coelomata;Deuterostomia;Chordata;Craniata;Vertebrata;Gnathostomata;Teleostomi;Euteleostomi;Sarcopterygii;Tetrapoda;Amniota;Mammalia;Theria;Eutheria;Euarchontoglires;Primates;Haplorrhini;Simiiformes;Catarrhini;Hominoidea;Hominidae;Homininae;Homo;Homo sapiens	36	2e-10	1	cellular organisms;Bacteria;Proteobacteria;Betaproteobacteria;Burkholderiales;Comamonadaceae;Acidovorax;Acidovorax sp. JS42	36	4e-08	ERR006333.sra.16003138	ERR006333	ERX001122	SRS000637	SRP000547	ERA000135	1000 Genomes CEPH (Utah residents with ancestry from Northern and Western Europe) population sequencing	NA12827	NA12827.20	1000G-mpimg-090415-8	CEU	2009-10-06	40523400	1125650	WGS	low coverage	no	ILLUMINA	data/NA12827/sequence_read/ERR006333.filt.fastq.gz	MPIMG	PAIRED	Solexa 1G Genome Analyzer	GENOMIC	163
cellular organisms;Eukaryota;Opisthokonta;Metazoa;Eumetazoa;Bilateria;Coelomata;Deuterostomia;Chordata;Craniata;Vertebrata;Gnathostomata;Teleostomi;Euteleostomi;Sarcopterygii;Tetrapoda;Amniota;Mammalia;Theria;Eutheria;Euarchontoglires;Primates;Haplorrhini;Simiiformes;Catarrhini;Hominoidea;Hominidae;Homininae;Homo;Homo sapiens	51	3e-19	1	cellular organisms;Bacteria;Proteobacteria;Gammaproteobacteria;Enterobacteriales;Enterobacteriaceae;Serratia	51	3e-19	ERR006345.sra.5395486	ERR006345	ERX001127	SRS000639	SRP000547	ERA000138	1000 Genomes CEPH (Utah residents with ancestry from Northern and Western Europe) population sequencing	NA12830	NA12830.22	1000G-mpimg-090515-1	CEU	2009-10-06	20819118	408218	WGS	low coverage	no	ILLUMINA	data/NA12830/sequence_read/ERR006345.filt.fastq.gz	MPIMG	PAIRED	Solexa 1G Genome Analyzer	GENOMIC	184
cellular organisms;Eukaryota;Opisthokonta;Metazoa;Eumetazoa;Bilateria;Coelomata;Deuterostomia;Chordata;Craniata;Vertebrata;Gnathostomata;Teleostomi;Euteleostomi;Sarcopterygii;Tetrapoda;Amniota;Mammalia;Theria;Eutheria;Euarchontoglires;Primates;Haplorrhini;Simiiformes;Catarrhini;Hominoidea;Hominidae;Homininae;Homo;Homo sapiens	51	3e-19	1	cellular organisms;Bacteria;Proteobacteria;Gammaproteobacteria;Enterobacteriales;Enterobacteriaceae;Serratia;Serratia proteamaculans;Serratia proteamaculans 568	51	3e-19	ERR006347.sra.5159646	ERR006347	ERX001127	SRS000639	SRP000547	ERA000138	1000 Genomes CEPH (Utah residents with ancestry from Northern and Western Europe) population sequencing	NA12830	NA12830.22	1000G-mpimg-090515-4	CEU	2009-10-06	5770701	113151	WGS	low coverage	no	ILLUMINA	data/NA12830/sequence_read/ERR006347.filt.fastq.gz	MPIMG	PAIRED	Solexa 1G Genome Analyzer	GENOMIC	184
cellular organisms;Eukaryota;Opisthokonta;Metazoa;Eumetazoa;Bilateria;Coelomata;Deuterostomia;Chordata;Craniata;Vertebrata;Gnathostomata;Teleostomi;Euteleostomi;Sarcopterygii;Tetrapoda;Amniota;Mammalia;Theria;Eutheria;Euarchontoglires;Primates;Haplorrhini;Simiiformes;Catarrhini;Hominoidea;Hominidae;Homininae;Homo;Homo sapiens	51	3e-19	1	cellular organisms;Bacteria;Proteobacteria;Gammaproteobacteria;Enterobacteriales;Enterobacteriaceae	51	2e-14	ERR006347.sra.10319387	ERR006347	ERX001127	SRS000639	SRP000547	ERA000138	1000 Genomes CEPH (Utah residents with ancestry from Northern and Western Europe) population sequencing	NA12830	NA12830.22	1000G-mpimg-090515-4	CEU	2009-10-06	5770701	113151	WGS	low coverage	no	ILLUMINA	data/NA12830/sequence_read/ERR006347.filt.fastq.gz	MPIMG	PAIRED	Solexa 1G Genome Analyzer	GENOMIC	184
cellular organisms;Eukaryota;Opisthokonta;Metazoa;Eumetazoa;Bilateria;Coelomata;Deuterostomia;Chordata;Craniata;Vertebrata;Gnathostomata;Teleostomi;Euteleostomi;Sarcopterygii;Tetrapoda;Amniota;Mammalia;Theria;Eutheria;Euarchontoglires;Primates;Haplorrhini;Simiiformes;Catarrhini;Hominoidea;Hominidae;Homininae;Homo;Homo sapiens	51	3e-19	1	cellular organisms;Bacteria;Proteobacteria;Gammaproteobacteria;Enterobacteriales;Enterobacteriaceae;Serratia	51	2e-14	ERR006347.sra.629279	ERR006347	ERX001127	SRS000639	SRP000547	ERA000138	1000 Genomes CEPH (Utah residents with ancestry from Northern and Western Europe) population sequencing	NA12830	NA12830.22	1000G-mpimg-090515-4	CEU	2009-10-06	5770701	113151	WGS	low coverage	no	ILLUMINA	data/NA12830/sequence_read/ERR006347.filt.fastq.gz	MPIMG	PAIRED	Solexa 1G Genome Analyzer	GENOMIC	184
cellular organisms;Eukaryota;Opisthokonta;Metazoa;Eumetazoa;Bilateria;Coelomata;Deuterostomia;Chordata;Craniata;Vertebrata;Gnathostomata;Teleostomi;Euteleostomi;Sarcopterygii;Tetrapoda;Amniota;Mammalia;Theria;Eutheria;Euarchontoglires;Primates;Haplorrhini;Simiiformes;Catarrhini;Hominoidea;Hominidae;Homininae;Homo;Homo sapiens	36	4e-08	1	cellular organisms;Bacteria;Proteobacteria;Betaproteobacteria;Burkholderiales;Comamonadaceae;Acidovorax	35	6e-10	ERR006323.sra.8879616	ERR006323	ERX001119	SRS000638	SRP000547	ERA000134	1000 Genomes CEPH (Utah residents with ancestry from Northern and Western Europe) population sequencing	NA12829	NA12829.21	1000G-mpimg-090413-3	CEU	2009-10-06	78475860	2179885	WGS	low coverage	no	ILLUMINA	data/NA12829/sequence_read/ERR006323.filt.fastq.gz	MPIMG	PAIRED	Solexa 1G Genome Analyzer	GENOMIC	169
cellular organisms;Eukaryota;Opisthokonta;Metazoa;Eumetazoa;Bilateria;Coelomata;Deuterostomia;Chordata;Craniata;Vertebrata;Gnathostomata;Teleostomi;Euteleostomi;Sarcopterygii;Tetrapoda;Amniota;Mammalia;Theria;Eutheria;Euarchontoglires;Primates;Haplorrhini;Simiiformes;Catarrhini;Hominoidea;Hominidae;Homininae;Homo;Homo sapiens	51	3e-19	1	cellular organisms;Bacteria;Proteobacteria;Gammaproteobacteria;Enterobacteriales;Enterobacteriaceae;Serratia	50	3e-16	ERR006347.sra.3290669	ERR006347	ERX001127	SRS000639	SRP000547	ERA000138	1000 Genomes CEPH (Utah residents with ancestry from Northern and Western Europe) population sequencing	NA12830	NA12830.22	1000G-mpimg-090515-4	CEU	2009-10-06	5770701	113151	WGS	low coverage	no	ILLUMINA	data/NA12830/sequence_read/ERR006347.filt.fastq.gz	MPIMG	PAIRED	Solexa 1G Genome Analyzer	GENOMIC	184
cellular organisms;Eukaryota;Opisthokonta;Metazoa;Eumetazoa;Bilateria;Coelomata;Deuterostomia;Chordata;Craniata;Vertebrata;Gnathostomata;Teleostomi;Euteleostomi;Sarcopterygii;Tetrapoda;Amniota;Mammalia;Theria;Eutheria;Euarchontoglires;Primates;Haplorrhini;Simiiformes;Catarrhini;Hominoidea;Hominidae;Homininae;Homo;Homo sapiens	51	3e-19	2	cellular organisms;Bacteria;Proteobacteria;Gammaproteobacteria;Enterobacteriales;Enterobacteriaceae;Serratia	49	1e-15	ERR006355.sra.8698521	ERR006355	ERX001132	SRS000639	SRP000547	ERA000139	1000 Genomes CEPH (Utah residents with ancestry from Northern and Western Europe) population sequencing	NA12830	NA12830.22	1000G-mpimg-090522-4	CEU	2009-10-15	66968202	1313102	WGS	low coverage	no	ILLUMINA	data/NA12830/sequence_read/ERR006355.filt.fastq.gz	MPIMG	PAIRED	Solexa 1G Genome Analyzer	GENOMIC	164
cellular organisms;Eukaryota;Opisthokonta;Metazoa;Eumetazoa;Bilateria;Coelomata;Deuterostomia;Chordata;Craniata;Vertebrata;Gnathostomata;Teleostomi;Euteleostomi;Sarcopterygii;Tetrapoda;Amniota;Mammalia;Theria;Eutheria;Euarchontoglires;Primates;Haplorrhini;Simiiformes;Catarrhini;Hominoidea;Hominidae;Homininae;Homo;Homo sapiens	51	3e-19	1	cellular organisms;Bacteria;Proteobacteria;Gammaproteobacteria;Enterobacteriales;Enterobacteriaceae;Serratia	51	8e-17	ERR006346.sra.4160698	ERR006346	ERX001127	SRS000639	SRP000547	ERA000138	1000 Genomes CEPH (Utah residents with ancestry from Northern and Western Europe) population sequencing	NA12830	NA12830.22	1000G-mpimg-090515-2	CEU	2009-10-06	10555929	206979	WGS	low coverage	no	ILLUMINA	data/NA12830/sequence_read/ERR006346.filt.fastq.gz	MPIMG	PAIRED	Solexa 1G Genome Analyzer	GENOMIC	184
cellular organisms;Eukaryota;Opisthokonta;Metazoa;Eumetazoa;Bilateria;Coelomata;Deuterostomia;Chordata;Craniata;Vertebrata;Gnathostomata;Teleostomi;Euteleostomi;Sarcopterygii;Tetrapoda;Amniota;Mammalia;Theria;Eutheria;Euarchontoglires;Primates;Haplorrhini;Simiiformes;Catarrhini;Hominoidea;Hominidae;Homininae;Homo;Homo sapiens	51	8e-17	2	cellular organisms;Bacteria;Proteobacteria;Gammaproteobacteria;Enterobacteriales;Enterobacteriaceae;Serratia	44	5e-15	ERR006347.sra.10074838	ERR006347	ERX001127	SRS000639	SRP000547	ERA000138	1000 Genomes CEPH (Utah residents with ancestry from Northern and Western Europe) population sequencing	NA12830	NA12830.22	1000G-mpimg-090515-4	CEU	2009-10-06	5770701	113151	WGS	low coverage	no	ILLUMINA	data/NA12830/sequence_read/ERR006347.filt.fastq.gz	MPIMG	PAIRED	Solexa 1G Genome Analyzer	GENOMIC	184
cellular organisms;Eukaryota;Opisthokonta;Metazoa;Eumetazoa;Bilateria;Coelomata;Deuterostomia;Chordata;Craniata;Vertebrata;Gnathostomata;Teleostomi;Euteleostomi;Sarcopterygii;Tetrapoda;Amniota;Mammalia;Theria;Eutheria;Euarchontoglires;Primates;Haplorrhini;Simiiformes;Catarrhini;Hominoidea;Hominidae;Homininae;Homo;Homo sapiens	51	3e-19	1	cellular organisms;Bacteria;Proteobacteria;Gammaproteobacteria;Xanthomonadales;Xanthomonadaceae;Stenotrophomonas;Stenotrophomonas maltophilia group;Stenotrophomonas maltophilia;Stenotrophomonas maltophilia R551-3	51	2e-14	ERR006345.sra.6100539	ERR006345	ERX001127	SRS000639	SRP000547	ERA000138	1000 Genomes CEPH (Utah residents with ancestry from Northern and Western Europe) population sequencing	NA12830	NA12830.22	1000G-mpimg-090515-1	CEU	2009-10-06	20819118	408218	WGS	low coverage	no	ILLUMINA	data/NA12830/sequence_read/ERR006345.filt.fastq.gz	MPIMG	PAIRED	Solexa 1G Genome Analyzer	GENOMIC	184
cellular organisms;Eukaryota;Opisthokonta;Metazoa;Eumetazoa;Bilateria;Coelomata;Deuterostomia;Chordata;Craniata;Vertebrata;Gnathostomata;Teleostomi;Euteleostomi;Sarcopterygii;Tetrapoda;Amniota;Mammalia;Theria;Eutheria;Euarchontoglires;Primates;Haplorrhini;Simiiformes;Catarrhini;Hominoidea;Hominidae;Homininae;Homo;Homo sapiens	51	3e-19	1	cellular organisms;Bacteria;Proteobacteria;Gammaproteobacteria;Xanthomonadales;Xanthomonadaceae;Stenotrophomonas;Stenotrophomonas maltophilia group;Stenotrophomonas maltophilia;Stenotrophomonas maltophilia R551-3	51	2e-14	ERR006355.sra.13407958	ERR006355	ERX001132	SRS000639	SRP000547	ERA000139	1000 Genomes CEPH (Utah residents with ancestry from Northern and Western Europe) population sequencing	NA12830	NA12830.22	1000G-mpimg-090522-4	CEU	2009-10-15	66968202	1313102	WGS	low coverage	no	ILLUMINA	data/NA12830/sequence_read/ERR006355.filt.fastq.gz	MPIMG	PAIRED	Solexa 1G Genome Analyzer	GENOMIC	164
cellular organisms;Eukaryota;Opisthokonta;Metazoa;Eumetazoa;Bilateria;Coelomata;Deuterostomia;Chordata;Craniata;Vertebrata;Gnathostomata;Teleostomi;Euteleostomi;Sarcopterygii;Tetrapoda;Amniota;Mammalia;Theria;Eutheria;Euarchontoglires;Primates;Haplorrhini;Simiiformes;Catarrhini;Hominoidea;Hominidae;Homininae;Homo;Homo sapiens	51	3e-19	2	cellular organisms;Bacteria;Proteobacteria;Gammaproteobacteria;Enterobacteriales;Enterobacteriaceae;Serratia;Serratia proteamaculans;Serratia proteamaculans 568	51	2e-14	ERR006347.sra.866327	ERR006347	ERX001127	SRS000639	SRP000547	ERA000138	1000 Genomes CEPH (Utah residents with ancestry from Northern and Western Europe) population sequencing	NA12830	NA12830.22	1000G-mpimg-090515-4	CEU	2009-10-06	5770701	113151	WGS	low coverage	no	ILLUMINA	data/NA12830/sequence_read/ERR006347.filt.fastq.gz	MPIMG	PAIRED	Solexa 1G Genome Analyzer	GENOMIC	184
cellular organisms;Eukaryota;Opisthokonta;Metazoa;Eumetazoa;Bilateria;Coelomata;Deuterostomia;Chordata;Craniata;Vertebrata;Gnathostomata;Teleostomi;Euteleostomi;Sarcopterygii;Tetrapoda;Amniota;Mammalia;Theria;Eutheria;Euarchontoglires;Primates;Haplorrhini;Simiiformes;Catarrhini;Hominoidea;Hominidae;Homininae;Homo;Homo sapiens	51	5e-12	1	cellular organisms;Bacteria;Proteobacteria;Betaproteobacteria;Burkholderiales;Burkholderiaceae;Burkholderia;Burkholderia cepacia complex;Burkholderia multivorans;Burkholderia multivorans ATCC 17616	51	5e-12	ERR006343.sra.12058948	ERR006343	ERX001125	SRS000639	SRP000547	ERA000137	1000 Genomes CEPH (Utah residents with ancestry from Northern and Western Europe) population sequencing	NA12830	NA12830.22_2-3	1000G-mpimg-090508-3	CEU	2009-10-06	95492553	1872403	WGS	low coverage	no	ILLUMINA	data/NA12830/sequence_read/ERR006343.filt.fastq.gz	MPIMG	PAIRED	Solexa 1G Genome Analyzer	GENOMIC	159
cellular organisms;Eukaryota;Opisthokonta;Metazoa;Eumetazoa;Bilateria;Coelomata;Deuterostomia;Chordata;Craniata;Vertebrata;Gnathostomata;Teleostomi;Euteleostomi;Sarcopterygii;Tetrapoda;Amniota;Mammalia;Theria;Eutheria;Euarchontoglires;Primates;Haplorrhini;Simiiformes;Catarrhini;Hominoidea;Hominidae;Homininae;Homo;Homo sapiens	35	6e-10	1	cellular organisms;Bacteria;Proteobacteria;Gammaproteobacteria;Enterobacteriales;Enterobacteriaceae	34	6e-07	ERR006262.sra.7558364	ERR006262	ERX001093	SRS000633	SRP000547	ERA000126	1000 Genomes CEPH (Utah residents with ancestry from Northern and Western Europe) population sequencing	NA12748	NA12748.19	1000G-mpimg-090220-6	CEU	2009-10-06	15307308	425203	WGS	low coverage	no	ILLUMINA	data/NA12748/sequence_read/ERR006262.filt.fastq.gz	MPIMG	PAIRED	Solexa 1G Genome Analyzer	GENOMIC	175
cellular organisms;Eukaryota;Opisthokonta;Metazoa;Eumetazoa;Bilateria;Coelomata;Deuterostomia;Chordata;Craniata;Vertebrata;Gnathostomata;Teleostomi;Euteleostomi;Sarcopterygii;Tetrapoda;Amniota;Mammalia;Theria;Eutheria;Euarchontoglires;Primates;Haplorrhini;Simiiformes;Catarrhini;Hominoidea;Hominidae;Homininae;Homo;Homo sapiens	51	3e-19	1	cellular organisms;Bacteria;Proteobacteria;Gammaproteobacteria;Xanthomonadales;Xanthomonadaceae;Stenotrophomonas;Stenotrophomonas maltophilia group;Stenotrophomonas maltophilia;Stenotrophomonas maltophilia R551-3	51	2e-14	ERR006347.sra.1888695	ERR006347	ERX001127	SRS000639	SRP000547	ERA000138	1000 Genomes CEPH (Utah residents with ancestry from Northern and Western Europe) population sequencing	NA12830	NA12830.22	1000G-mpimg-090515-4	CEU	2009-10-06	5770701	113151	WGS	low coverage	no	ILLUMINA	data/NA12830/sequence_read/ERR006347.filt.fastq.gz	MPIMG	PAIRED	Solexa 1G Genome Analyzer	GENOMIC	184
cellular organisms;Eukaryota;Opisthokonta;Metazoa;Eumetazoa;Bilateria;Coelomata;Deuterostomia;Chordata;Craniata;Vertebrata;Gnathostomata;Teleostomi;Euteleostomi;Sarcopterygii;Tetrapoda;Amniota;Mammalia;Theria;Eutheria;Euarchontoglires;Primates;Haplorrhini;Simiiformes;Catarrhini;Hominoidea;Hominidae;Homininae;Homo;Homo sapiens	36	2e-10	1	cellular organisms;Bacteria;Actinobacteria;Actinobacteria;Actinobacteridae;Actinomycetales;Streptosporangineae	33	2e-06	ERR006285.sra.4769782	ERR006285	ERX001106	SRS000643	SRP000547	ERA000129	1000 Genomes CEPH (Utah residents with ancestry from Northern and Western Europe) population sequencing	NA12890	NA12890.26	1000G-mpimg-090306-5	CEU	2009-10-06	48472812	1346467	WGS	low coverage	no	ILLUMINA	data/NA12890/sequence_read/ERR006285.filt.fastq.gz	MPIMG	PAIRED	Solexa 1G Genome Analyzer	GENOMIC	172
cellular organisms;Eukaryota;Opisthokonta;Metazoa;Eumetazoa;Bilateria;Coelomata;Deuterostomia;Chordata;Craniata;Vertebrata;Gnathostomata;Teleostomi;Euteleostomi;Sarcopterygii;Tetrapoda;Amniota;Mammalia;Theria;Eutheria;Euarchontoglires;Primates;Haplorrhini;Simiiformes;Catarrhini;Hominoidea;Hominidae;Homininae;Homo;Homo sapiens	51	3e-19	1	cellular organisms;Bacteria;Proteobacteria;Gammaproteobacteria;Xanthomonadales;Xanthomonadaceae;Stenotrophomonas;Stenotrophomonas maltophilia group;Stenotrophomonas maltophilia;Stenotrophomonas maltophilia R551-3	51	2e-14	ERR006355.sra.12542083	ERR006355	ERX001132	SRS000639	SRP000547	ERA000139	1000 Genomes CEPH (Utah residents with ancestry from Northern and Western Europe) population sequencing	NA12830	NA12830.22	1000G-mpimg-090522-4	CEU	2009-10-15	66968202	1313102	WGS	low coverage	no	ILLUMINA	data/NA12830/sequence_read/ERR006355.filt.fastq.gz	MPIMG	PAIRED	Solexa 1G Genome Analyzer	GENOMIC	164
cellular organisms;Eukaryota;Opisthokonta;Metazoa;Eumetazoa;Bilateria;Coelomata;Deuterostomia;Chordata;Craniata;Vertebrata;Gnathostomata;Teleostomi;Euteleostomi;Sarcopterygii;Tetrapoda;Amniota;Mammalia;Theria;Eutheria;Euarchontoglires;Primates;Haplorrhini;Simiiformes;Catarrhini;Hominoidea;Hominidae;Homininae;Homo;Homo sapiens	51	3e-19	1	cellular organisms;Bacteria;Proteobacteria;Gammaproteobacteria;Xanthomonadales;Xanthomonadaceae;Stenotrophomonas;Stenotrophomonas maltophilia group;Stenotrophomonas maltophilia	51	2e-14	ERR006345.sra.9830148	ERR006345	ERX001127	SRS000639	SRP000547	ERA000138	1000 Genomes CEPH (Utah residents with ancestry from Northern and Western Europe) population sequencing	NA12830	NA12830.22	1000G-mpimg-090515-1	CEU	2009-10-06	20819118	408218	WGS	low coverage	no	ILLUMINA	data/NA12830/sequence_read/ERR006345.filt.fastq.gz	MPIMG	PAIRED	Solexa 1G Genome Analyzer	GENOMIC	184
cellular organisms;Eukaryota;Opisthokonta;Metazoa;Eumetazoa;Bilateria;Coelomata;Deuterostomia;Chordata;Craniata;Vertebrata;Gnathostomata;Teleostomi;Euteleostomi;Sarcopterygii;Tetrapoda;Amniota;Mammalia;Theria;Eutheria;Euarchontoglires;Primates;Haplorrhini;Simiiformes;Catarrhini;Hominoidea;Hominidae;Homininae;Homo;Homo sapiens	51	3e-19	1	cellular organisms;Bacteria;Proteobacteria;Gammaproteobacteria;Xanthomonadales;Xanthomonadaceae;Stenotrophomonas;Stenotrophomonas maltophilia group;Stenotrophomonas maltophilia;Stenotrophomonas maltophilia R551-3	51	8e-17	ERR006347.sra.582009	ERR006347	ERX001127	SRS000639	SRP000547	ERA000138	1000 Genomes CEPH (Utah residents with ancestry from Northern and Western Europe) population sequencing	NA12830	NA12830.22	1000G-mpimg-090515-4	CEU	2009-10-06	5770701	113151	WGS	low coverage	no	ILLUMINA	data/NA12830/sequence_read/ERR006347.filt.fastq.gz	MPIMG	PAIRED	Solexa 1G Genome Analyzer	GENOMIC	184
cellular organisms;Eukaryota;Opisthokonta;Metazoa;Eumetazoa;Bilateria;Coelomata;Deuterostomia;Chordata;Craniata;Vertebrata;Gnathostomata;Teleostomi;Euteleostomi;Sarcopterygii;Tetrapoda;Amniota;Mammalia;Theria;Eutheria;Euarchontoglires;Primates;Haplorrhini;Simiiformes;Catarrhini;Hominoidea;Hominidae;Homininae;Homo;Homo sapiens	51	3e-19	1	cellular organisms;Bacteria;Proteobacteria;Gammaproteobacteria;Xanthomonadales;Xanthomonadaceae;Stenotrophomonas;Stenotrophomonas maltophilia group;Stenotrophomonas maltophilia	51	8e-17	ERR006345.sra.5212838	ERR006345	ERX001127	SRS000639	SRP000547	ERA000138	1000 Genomes CEPH (Utah residents with ancestry from Northern and Western Europe) population sequencing	NA12830	NA12830.22	1000G-mpimg-090515-1	CEU	2009-10-06	20819118	408218	WGS	low coverage	no	ILLUMINA	data/NA12830/sequence_read/ERR006345.filt.fastq.gz	MPIMG	PAIRED	Solexa 1G Genome Analyzer	GENOMIC	184
cellular organisms;Eukaryota;Opisthokonta;Metazoa;Eumetazoa;Bilateria;Coelomata;Deuterostomia;Chordata;Craniata;Vertebrata;Gnathostomata;Teleostomi;Euteleostomi;Sarcopterygii;Tetrapoda;Amniota;Mammalia;Theria;Eutheria;Euarchontoglires;Primates;Haplorrhini;Simiiformes;Catarrhini;Hominoidea;Hominidae;Homininae;Homo;Homo sapiens	51	2e-14	1	cellular organisms;Bacteria;Proteobacteria;Gammaproteobacteria;Enterobacteriales;Enterobacteriaceae	48	2e-17	ERR006347.sra.8392543	ERR006347	ERX001127	SRS000639	SRP000547	ERA000138	1000 Genomes CEPH (Utah residents with ancestry from Northern and Western Europe) population sequencing	NA12830	NA12830.22	1000G-mpimg-090515-4	CEU	2009-10-06	5770701	113151	WGS	low coverage	no	ILLUMINA	data/NA12830/sequence_read/ERR006347.filt.fastq.gz	MPIMG	PAIRED	Solexa 1G Genome Analyzer	GENOMIC	184
cellular organisms;Eukaryota;Opisthokonta;Metazoa;Eumetazoa;Bilateria;Coelomata;Deuterostomia;Chordata;Craniata;Vertebrata;Gnathostomata;Teleostomi;Euteleostomi;Sarcopterygii;Tetrapoda;Amniota;Mammalia;Theria;Eutheria;Euarchontoglires;Primates;Haplorrhini;Simiiformes;Catarrhini;Hominoidea;Hominidae;Homininae;Homo;Homo sapiens	50	1e-18	2	cellular organisms;Bacteria;Proteobacteria;Betaproteobacteria;Burkholderiales;Oxalobacteraceae;Herminiimonas;Herminiimonas arsenicoxydans	51	8e-17	ERR006345.sra.3766476	ERR006345	ERX001127	SRS000639	SRP000547	ERA000138	1000 Genomes CEPH (Utah residents with ancestry from Northern and Western Europe) population sequencing	NA12830	NA12830.22	1000G-mpimg-090515-1	CEU	2009-10-06	20819118	408218	WGS	low coverage	no	ILLUMINA	data/NA12830/sequence_read/ERR006345.filt.fastq.gz	MPIMG	PAIRED	Solexa 1G Genome Analyzer	GENOMIC	184
cellular organisms;Eukaryota;Opisthokonta;Metazoa;Eumetazoa;Bilateria;Coelomata;Deuterostomia;Chordata;Craniata;Vertebrata;Gnathostomata;Teleostomi;Euteleostomi;Sarcopterygii;Tetrapoda;Amniota;Mammalia;Theria;Eutheria;Euarchontoglires;Primates;Haplorrhini;Simiiformes;Catarrhini;Hominoidea;Hominidae;Homininae;Homo;Homo sapiens	51	2e-14	2	cellular organisms;Bacteria;Proteobacteria;Gammaproteobacteria;Xanthomonadales;Xanthomonadaceae;Stenotrophomonas;Stenotrophomonas maltophilia group;Stenotrophomonas maltophilia	47	2e-14	ERR006345.sra.10223144	ERR006345	ERX001127	SRS000639	SRP000547	ERA000138	1000 Genomes CEPH (Utah residents with ancestry from Northern and Western Europe) population sequencing	NA12830	NA12830.22	1000G-mpimg-090515-1	CEU	2009-10-06	20819118	408218	WGS	low coverage	no	ILLUMINA	data/NA12830/sequence_read/ERR006345.filt.fastq.gz	MPIMG	PAIRED	Solexa 1G Genome Analyzer	GENOMIC	184
cellular organisms;Eukaryota;Opisthokonta;Metazoa;Eumetazoa;Bilateria;Coelomata;Deuterostomia;Chordata;Craniata;Vertebrata;Gnathostomata;Teleostomi;Euteleostomi;Sarcopterygii;Tetrapoda;Amniota;Mammalia;Theria;Eutheria;Euarchontoglires;Primates;Haplorrhini;Simiiformes;Catarrhini;Hominoidea;Hominidae;Homininae;Homo;Homo sapiens	51	3e-19	1	cellular organisms;Bacteria;Proteobacteria;Gammaproteobacteria;Enterobacteriales;Enterobacteriaceae;Serratia	51	5e-12	ERR006345.sra.7416358	ERR006345	ERX001127	SRS000639	SRP000547	ERA000138	1000 Genomes CEPH (Utah residents with ancestry from Northern and Western Europe) population sequencing	NA12830	NA12830.22	1000G-mpimg-090515-1	CEU	2009-10-06	20819118	408218	WGS	low coverage	no	ILLUMINA	data/NA12830/sequence_read/ERR006345.filt.fastq.gz	MPIMG	PAIRED	Solexa 1G Genome Analyzer	GENOMIC	184
cellular organisms;Eukaryota;Opisthokonta;Metazoa;Eumetazoa;Bilateria;Coelomata;Deuterostomia;Chordata;Craniata;Vertebrata;Gnathostomata;Teleostomi;Euteleostomi;Sarcopterygii;Tetrapoda;Amniota;Mammalia;Theria;Eutheria;Euarchontoglires;Primates;Haplorrhini;Simiiformes;Catarrhini;Hominoidea;Hominidae;Homininae;Homo;Homo sapiens	51	3e-19	1	cellular organisms;Bacteria;Proteobacteria;Gammaproteobacteria;Enterobacteriales;Enterobacteriaceae	49	1e-15	ERR006458.sra.13276703	ERR006458	ERX001169	SRS000621	SRP000547	ERA000155	1000 Genomes CEPH (Utah residents with ancestry from Northern and Western Europe) population sequencing	NA12286	NA12286.18	1000G-mpimg-090916-8	CEU	2009-10-08	56741886	1112586	WGS	low coverage	no	ILLUMINA	data/NA12286/sequence_read/ERR006458.filt.fastq.gz	MPIMG	PAIRED	Solexa 1G Genome Analyzer	GENOMIC	188
cellular organisms;Eukaryota;Opisthokonta;Metazoa;Eumetazoa;Bilateria;Coelomata;Deuterostomia;Chordata;Craniata;Vertebrata;Gnathostomata;Teleostomi;Euteleostomi;Sarcopterygii;Tetrapoda;Amniota;Mammalia;Theria;Eutheria;Euarchontoglires;Primates;Haplorrhini;Simiiformes;Catarrhini;Hominoidea;Hominidae;Homininae;Homo;Homo sapiens	51	3e-19	2	cellular organisms;Bacteria;Proteobacteria	51	3e-19	ERR006347.sra.3049667	ERR006347	ERX001127	SRS000639	SRP000547	ERA000138	1000 Genomes CEPH (Utah residents with ancestry from Northern and Western Europe) population sequencing	NA12830	NA12830.22	1000G-mpimg-090515-4	CEU	2009-10-06	5770701	113151	WGS	low coverage	no	ILLUMINA	data/NA12830/sequence_read/ERR006347.filt.fastq.gz	MPIMG	PAIRED	Solexa 1G Genome Analyzer	GENOMIC	184
cellular organisms;Eukaryota;Opisthokonta;Metazoa;Eumetazoa;Bilateria;Coelomata;Deuterostomia;Chordata;Craniata;Vertebrata;Gnathostomata;Teleostomi;Euteleostomi;Sarcopterygii;Tetrapoda;Amniota;Mammalia;Theria;Eutheria;Euarchontoglires;Primates;Haplorrhini;Simiiformes;Catarrhini;Hominoidea;Hominidae;Homininae;Homo;Homo sapiens	51	3e-19	1	cellular organisms;Bacteria;Proteobacteria;Gammaproteobacteria;Xanthomonadales;Xanthomonadaceae;Stenotrophomonas;Stenotrophomonas maltophilia group;Stenotrophomonas maltophilia;Stenotrophomonas maltophilia K279a	48	1e-12	ERR006343.sra.6196831	ERR006343	ERX001125	SRS000639	SRP000547	ERA000137	1000 Genomes CEPH (Utah residents with ancestry from Northern and Western Europe) population sequencing	NA12830	NA12830.22_2-3	1000G-mpimg-090508-3	CEU	2009-10-06	95492553	1872403	WGS	low coverage	no	ILLUMINA	data/NA12830/sequence_read/ERR006343.filt.fastq.gz	MPIMG	PAIRED	Solexa 1G Genome Analyzer	GENOMIC	159
cellular organisms;Eukaryota;Opisthokonta;Metazoa;Eumetazoa;Bilateria;Coelomata;Deuterostomia;Chordata;Craniata;Vertebrata;Gnathostomata;Teleostomi;Euteleostomi;Sarcopterygii;Tetrapoda;Amniota;Mammalia;Theria;Eutheria;Euarchontoglires;Primates;Haplorrhini;Simiiformes;Catarrhini;Hominoidea;Hominidae;Homininae;Homo;Homo sapiens	36	2e-10	1	cellular organisms;Bacteria;Proteobacteria;Betaproteobacteria;Burkholderiales;Comamonadaceae;Acidovorax	35	6e-10	ERR005841.sra.7619945	ERR005841	ERX000722	SRS000619	SRP000547	ERA000109	1000 Genomes CEPH (Utah residents with ancestry from Northern and Western Europe) population sequencing	NA12282	NA12282.16	1000G-mpimg-090115-1	CEU	2009-09-04	19678824	546634	WGS	low coverage	no	ILLUMINA	data/NA12282/sequence_read/ERR005841.filt.fastq.gz	MPIMG	PAIRED	Solexa 1G Genome Analyzer	GENOMIC	172
cellular organisms;Eukaryota;Opisthokonta;Metazoa;Eumetazoa;Bilateria;Coelomata;Deuterostomia;Chordata;Craniata;Vertebrata;Gnathostomata;Teleostomi;Euteleostomi;Sarcopterygii;Tetrapoda;Amniota;Mammalia;Theria;Eutheria;Euarchontoglires;Primates;Haplorrhini;Simiiformes;Catarrhini;Hominoidea;Hominidae;Homininae;Homo;Homo sapiens	51	3e-19	1	cellular organisms;Bacteria;Proteobacteria;Gammaproteobacteria;Enterobacteriales;Enterobacteriaceae	51	2e-14	ERR006347.sra.6591870	ERR006347	ERX001127	SRS000639	SRP000547	ERA000138	1000 Genomes CEPH (Utah residents with ancestry from Northern and Western Europe) population sequencing	NA12830	NA12830.22	1000G-mpimg-090515-4	CEU	2009-10-06	5770701	113151	WGS	low coverage	no	ILLUMINA	data/NA12830/sequence_read/ERR006347.filt.fastq.gz	MPIMG	PAIRED	Solexa 1G Genome Analyzer	GENOMIC	184
cellular organisms;Eukaryota;Opisthokonta;Metazoa;Eumetazoa;Bilateria;Coelomata;Deuterostomia;Chordata;Craniata;Vertebrata;Gnathostomata;Teleostomi;Euteleostomi;Sarcopterygii;Tetrapoda;Amniota;Mammalia;Theria;Eutheria;Euarchontoglires;Primates;Haplorrhini;Simiiformes;Catarrhini;Hominoidea;Hominidae;Homininae;Homo;Homo sapiens	51	3e-19	1	cellular organisms;Bacteria;Actinobacteria;Actinobacteria;Actinobacteridae;Actinomycetales;Propionibacterineae;Propionibacteriaceae;Propionibacterium;Propionibacterium acnes	51	3e-19	ERR006347.sra.5234493	ERR006347	ERX001127	SRS000639	SRP000547	ERA000138	1000 Genomes CEPH (Utah residents with ancestry from Northern and Western Europe) population sequencing	NA12830	NA12830.22	1000G-mpimg-090515-4	CEU	2009-10-06	5770701	113151	WGS	low coverage	no	ILLUMINA	data/NA12830/sequence_read/ERR006347.filt.fastq.gz	MPIMG	PAIRED	Solexa 1G Genome Analyzer	GENOMIC	184
cellular organisms;Eukaryota;Opisthokonta;Metazoa;Eumetazoa;Bilateria;Coelomata;Deuterostomia;Chordata;Craniata;Vertebrata;Gnathostomata;Teleostomi;Euteleostomi;Sarcopterygii;Tetrapoda;Amniota;Mammalia;Theria;Eutheria;Euarchontoglires;Primates;Haplorrhini;Simiiformes;Catarrhini;Hominoidea;Hominidae;Homininae;Homo;Homo sapiens	44	5e-15	1	cellular organisms;Bacteria;Proteobacteria;Betaproteobacteria;Burkholderiales;Comamonadaceae;Acidovorax	51	3e-19	ERR006371.sra.1363046	ERR006371	ERX001140	SRS000620	SRP000547	ERA000142	1000 Genomes CEPH (Utah residents with ancestry from Northern and Western Europe) population sequencing	NA12283	NA12283.17	1000G-mpimg-090611-4	CEU	2009-10-06	17476935	342685	WGS	low coverage	no	ILLUMINA	data/NA12283/sequence_read/ERR006371.filt.fastq.gz	MPIMG	PAIRED	Solexa 1G Genome Analyzer	GENOMIC	178
cellular organisms;Eukaryota;Opisthokonta;Metazoa;Eumetazoa;Bilateria;Coelomata;Deuterostomia;Chordata;Craniata;Vertebrata;Gnathostomata;Teleostomi;Euteleostomi;Sarcopterygii;Tetrapoda;Amniota;Mammalia;Theria;Eutheria;Euarchontoglires;Primates;Haplorrhini;Simiiformes;Catarrhini;Hominoidea;Hominidae;Homininae;Homo;Homo sapiens	51	3e-19	1	cellular organisms;Bacteria;Proteobacteria;Gammaproteobacteria;Enterobacteriales;Enterobacteriaceae;Serratia	51	8e-17	ERR006347.sra.2857314	ERR006347	ERX001127	SRS000639	SRP000547	ERA000138	1000 Genomes CEPH (Utah residents with ancestry from Northern and Western Europe) population sequencing	NA12830	NA12830.22	1000G-mpimg-090515-4	CEU	2009-10-06	5770701	113151	WGS	low coverage	no	ILLUMINA	data/NA12830/sequence_read/ERR006347.filt.fastq.gz	MPIMG	PAIRED	Solexa 1G Genome Analyzer	GENOMIC	184
cellular organisms;Eukaryota;Opisthokonta;Metazoa;Eumetazoa;Bilateria;Coelomata;Deuterostomia;Chordata;Craniata;Vertebrata;Gnathostomata;Teleostomi;Euteleostomi;Sarcopterygii;Tetrapoda;Amniota;Mammalia;Theria;Eutheria;Euarchontoglires;Primates;Haplorrhini;Simiiformes;Catarrhini;Hominoidea;Hominidae;Homininae;Homo;Homo sapiens	51	3e-19	2	cellular organisms;Bacteria;Actinobacteria;Actinobacteria;Actinobacteridae;Actinomycetales;Propionibacterineae;Propionibacteriaceae;Propionibacterium;Propionibacterium acnes	51	8e-17	ERR006355.sra.12324711	ERR006355	ERX001132	SRS000639	SRP000547	ERA000139	1000 Genomes CEPH (Utah residents with ancestry from Northern and Western Europe) population sequencing	NA12830	NA12830.22	1000G-mpimg-090522-4	CEU	2009-10-15	66968202	1313102	WGS	low coverage	no	ILLUMINA	data/NA12830/sequence_read/ERR006355.filt.fastq.gz	MPIMG	PAIRED	Solexa 1G Genome Analyzer	GENOMIC	164
cellular organisms;Eukaryota;Opisthokonta;Metazoa;Eumetazoa;Bilateria;Coelomata;Deuterostomia;Chordata;Craniata;Vertebrata;Gnathostomata;Teleostomi;Euteleostomi;Sarcopterygii;Tetrapoda;Amniota;Mammalia;Theria;Eutheria;Euarchontoglires;Primates;Haplorrhini;Simiiformes;Catarrhini;Hominoidea;Hominidae;Homininae;Homo;Homo sapiens	51	3e-19	1	cellular organisms;Bacteria;Proteobacteria;Gammaproteobacteria;Enterobacteriales;Enterobacteriaceae;Serratia;Serratia proteamaculans;Serratia proteamaculans 568	51	2e-14	ERR006345.sra.5180796	ERR006345	ERX001127	SRS000639	SRP000547	ERA000138	1000 Genomes CEPH (Utah residents with ancestry from Northern and Western Europe) population sequencing	NA12830	NA12830.22	1000G-mpimg-090515-1	CEU	2009-10-06	20819118	408218	WGS	low coverage	no	ILLUMINA	data/NA12830/sequence_read/ERR006345.filt.fastq.gz	MPIMG	PAIRED	Solexa 1G Genome Analyzer	GENOMIC	184
cellular organisms;Eukaryota;Opisthokonta;Metazoa;Eumetazoa;Bilateria;Coelomata;Deuterostomia;Chordata;Craniata;Vertebrata;Gnathostomata;Teleostomi;Euteleostomi;Sarcopterygii;Tetrapoda;Amniota;Mammalia;Theria;Eutheria;Euarchontoglires;Primates;Haplorrhini;Simiiformes;Catarrhini;Hominoidea;Hominidae;Homininae;Homo;Homo sapiens	51	3e-19	1	cellular organisms;Bacteria;Proteobacteria;Gammaproteobacteria;Pseudomonadales;Pseudomonadaceae;Pseudomonas;Pseudomonas fluorescens group;Pseudomonas fluorescens;Pseudomonas fluorescens Pf-5	47	2e-14	ERR006347.sra.1863249	ERR006347	ERX001127	SRS000639	SRP000547	ERA000138	1000 Genomes CEPH (Utah residents with ancestry from Northern and Western Europe) population sequencing	NA12830	NA12830.22	1000G-mpimg-090515-4	CEU	2009-10-06	5770701	113151	WGS	low coverage	no	ILLUMINA	data/NA12830/sequence_read/ERR006347.filt.fastq.gz	MPIMG	PAIRED	Solexa 1G Genome Analyzer	GENOMIC	184
cellular organisms;Eukaryota;Opisthokonta;Metazoa;Eumetazoa;Bilateria;Coelomata;Deuterostomia;Chordata;Craniata;Vertebrata;Gnathostomata;Teleostomi;Euteleostomi;Sarcopterygii;Tetrapoda;Amniota;Mammalia;Theria;Eutheria;Euarchontoglires;Primates;Haplorrhini;Simiiformes;Catarrhini;Hominoidea;Hominidae;Homininae;Homo;Homo sapiens	51	3e-19	1	cellular organisms;Bacteria;Actinobacteria;Actinobacteria;Actinobacteridae;Actinomycetales;Propionibacterineae;Propionibacteriaceae;Propionibacterium;Propionibacterium acnes	51	8e-17	ERR006345.sra.9518716	ERR006345	ERX001127	SRS000639	SRP000547	ERA000138	1000 Genomes CEPH (Utah residents with ancestry from Northern and Western Europe) population sequencing	NA12830	NA12830.22	1000G-mpimg-090515-1	CEU	2009-10-06	20819118	408218	WGS	low coverage	no	ILLUMINA	data/NA12830/sequence_read/ERR006345.filt.fastq.gz	MPIMG	PAIRED	Solexa 1G Genome Analyzer	GENOMIC	184
cellular organisms;Eukaryota;Opisthokonta;Metazoa;Eumetazoa;Bilateria;Coelomata;Deuterostomia;Chordata;Craniata;Vertebrata;Gnathostomata;Teleostomi;Euteleostomi;Sarcopterygii;Tetrapoda;Amniota;Mammalia;Theria;Eutheria;Euarchontoglires;Primates;Haplorrhini;Simiiformes;Catarrhini;Hominoidea;Hominidae;Homininae;Homo;Homo sapiens	51	8e-17	1	cellular organisms;Bacteria;Proteobacteria;Gammaproteobacteria;Xanthomonadales;Xanthomonadaceae;Stenotrophomonas;Stenotrophomonas maltophilia group;Stenotrophomonas maltophilia;Stenotrophomonas maltophilia K279a	48	5e-15	ERR006347.sra.2917433	ERR006347	ERX001127	SRS000639	SRP000547	ERA000138	1000 Genomes CEPH (Utah residents with ancestry from Northern and Western Europe) population sequencing	NA12830	NA12830.22	1000G-mpimg-090515-4	CEU	2009-10-06	5770701	113151	WGS	low coverage	no	ILLUMINA	data/NA12830/sequence_read/ERR006347.filt.fastq.gz	MPIMG	PAIRED	Solexa 1G Genome Analyzer	GENOMIC	184
cellular organisms;Eukaryota;Opisthokonta;Metazoa;Eumetazoa;Bilateria;Coelomata;Deuterostomia;Chordata;Craniata;Vertebrata;Gnathostomata;Teleostomi;Euteleostomi;Sarcopterygii;Tetrapoda;Amniota;Mammalia;Theria;Eutheria;Euarchontoglires;Primates;Haplorrhini;Simiiformes;Catarrhini;Hominoidea;Hominidae;Homininae;Homo;Homo sapiens	32	4e-08	1	cellular organisms;Bacteria;Proteobacteria;Gammaproteobacteria;Enterobacteriales;Enterobacteriaceae;Salmonella;Salmonella enterica;Salmonella enterica subsp. enterica	36	4e-08	ERR001732.sra.5744882	ERR001732	ERX000170	SRS000090	SRP000032	ERA000068	1000Genomes Project Pilot 2	NA12878	g1k-sc-NA12878-CEU-1	IL22_307_1	CEU	2008-12-15	727740	20215	WGS	high coverage	no	ILLUMINA	data/NA12878/sequence_read/ERR001732.filt.fastq.gz	SC	PAIRED	Solexa 1G Genome Analyzer	GENOMIC	175
cellular organisms;Eukaryota;Opisthokonta;Metazoa;Eumetazoa;Bilateria;Coelomata;Deuterostomia;Chordata;Craniata;Vertebrata;Gnathostomata;Teleostomi;Euteleostomi;Sarcopterygii;Tetrapoda;Amniota;Mammalia;Theria;Eutheria;Euarchontoglires;Primates;Haplorrhini;Simiiformes;Catarrhini;Hominoidea;Hominidae;Homininae;Homo;Homo sapiens	51	3e-19	2	cellular organisms;Bacteria;Proteobacteria;Gammaproteobacteria;Enterobacteriales;Enterobacteriaceae	44	5e-15	ERR006355.sra.12960215	ERR006355	ERX001132	SRS000639	SRP000547	ERA000139	1000 Genomes CEPH (Utah residents with ancestry from Northern and Western Europe) population sequencing	NA12830	NA12830.22	1000G-mpimg-090522-4	CEU	2009-10-15	66968202	1313102	WGS	low coverage	no	ILLUMINA	data/NA12830/sequence_read/ERR006355.filt.fastq.gz	MPIMG	PAIRED	Solexa 1G Genome Analyzer	GENOMIC	164
cellular organisms;Eukaryota;Opisthokonta;Metazoa;Eumetazoa;Bilateria;Coelomata;Deuterostomia;Chordata;Craniata;Vertebrata;Gnathostomata;Teleostomi;Euteleostomi;Sarcopterygii;Tetrapoda;Amniota;Mammalia;Theria;Eutheria;Euarchontoglires;Primates;Haplorrhini;Simiiformes;Catarrhini;Hominoidea;Hominidae;Homininae;Homo;Homo sapiens	51	3e-19	1	cellular organisms;Bacteria;Proteobacteria;Gammaproteobacteria;Xanthomonadales;Xanthomonadaceae;Stenotrophomonas;Stenotrophomonas maltophilia group;Stenotrophomonas maltophilia;Stenotrophomonas maltophilia K279a	51	2e-14	ERR006347.sra.4238893	ERR006347	ERX001127	SRS000639	SRP000547	ERA000138	1000 Genomes CEPH (Utah residents with ancestry from Northern and Western Europe) population sequencing	NA12830	NA12830.22	1000G-mpimg-090515-4	CEU	2009-10-06	5770701	113151	WGS	low coverage	no	ILLUMINA	data/NA12830/sequence_read/ERR006347.filt.fastq.gz	MPIMG	PAIRED	Solexa 1G Genome Analyzer	GENOMIC	184
cellular organisms;Eukaryota;Opisthokonta;Metazoa;Eumetazoa;Bilateria;Coelomata;Deuterostomia;Chordata;Craniata;Vertebrata;Gnathostomata;Teleostomi;Euteleostomi;Sarcopterygii;Tetrapoda;Amniota;Mammalia;Theria;Eutheria;Euarchontoglires;Primates;Haplorrhini;Simiiformes;Catarrhini;Hominoidea;Hominidae;Homininae;Homo;Homo sapiens	37	7e-11	3	cellular organisms;Bacteria;Proteobacteria;Gammaproteobacteria;Xanthomonadales;Xanthomonadaceae;Stenotrophomonas;Stenotrophomonas maltophilia group;Stenotrophomonas maltophilia;Stenotrophomonas maltophilia K279a	51	2e-14	ERR006345.sra.3933969	ERR006345	ERX001127	SRS000639	SRP000547	ERA000138	1000 Genomes CEPH (Utah residents with ancestry from Northern and Western Europe) population sequencing	NA12830	NA12830.22	1000G-mpimg-090515-1	CEU	2009-10-06	20819118	408218	WGS	low coverage	no	ILLUMINA	data/NA12830/sequence_read/ERR006345.filt.fastq.gz	MPIMG	PAIRED	Solexa 1G Genome Analyzer	GENOMIC	184
cellular organisms;Eukaryota;Opisthokonta;Metazoa;Eumetazoa;Bilateria;Coelomata;Deuterostomia;Chordata;Craniata;Vertebrata;Gnathostomata;Teleostomi;Euteleostomi;Sarcopterygii;Tetrapoda;Amniota;Mammalia;Theria;Eutheria;Euarchontoglires;Primates;Haplorrhini;Simiiformes;Catarrhini;Hominoidea;Hominidae;Homininae;Homo;Homo sapiens	51	3e-19	1	cellular organisms;Bacteria;Actinobacteria;Actinobacteria;Actinobacteridae;Actinomycetales;Propionibacterineae;Propionibacteriaceae;Propionibacterium;Propionibacterium acnes	51	3e-19	ERR006345.sra.8485509	ERR006345	ERX001127	SRS000639	SRP000547	ERA000138	1000 Genomes CEPH (Utah residents with ancestry from Northern and Western Europe) population sequencing	NA12830	NA12830.22	1000G-mpimg-090515-1	CEU	2009-10-06	20819118	408218	WGS	low coverage	no	ILLUMINA	data/NA12830/sequence_read/ERR006345.filt.fastq.gz	MPIMG	PAIRED	Solexa 1G Genome Analyzer	GENOMIC	184
cellular organisms;Eukaryota;Opisthokonta;Metazoa;Eumetazoa;Bilateria;Coelomata;Deuterostomia;Chordata;Craniata;Vertebrata;Gnathostomata;Teleostomi;Euteleostomi;Sarcopterygii;Tetrapoda;Amniota;Mammalia;Theria;Eutheria;Euarchontoglires;Primates;Haplorrhini;Simiiformes;Catarrhini;Hominoidea;Hominidae;Homininae;Homo;Homo sapiens	51	3e-19	2	cellular organisms;Bacteria;Proteobacteria;Gammaproteobacteria;Xanthomonadales;Xanthomonadaceae;Stenotrophomonas;Stenotrophomonas maltophilia group;Stenotrophomonas maltophilia	51	3e-19	ERR006347.sra.6301171	ERR006347	ERX001127	SRS000639	SRP000547	ERA000138	1000 Genomes CEPH (Utah residents with ancestry from Northern and Western Europe) population sequencing	NA12830	NA12830.22	1000G-mpimg-090515-4	CEU	2009-10-06	5770701	113151	WGS	low coverage	no	ILLUMINA	data/NA12830/sequence_read/ERR006347.filt.fastq.gz	MPIMG	PAIRED	Solexa 1G Genome Analyzer	GENOMIC	184
cellular organisms;Eukaryota;Opisthokonta;Metazoa;Eumetazoa;Bilateria;Coelomata;Deuterostomia;Chordata;Craniata;Vertebrata;Gnathostomata;Teleostomi;Euteleostomi;Sarcopterygii;Tetrapoda;Amniota;Mammalia;Theria;Eutheria;Euarchontoglires;Primates;Haplorrhini;Simiiformes;Catarrhini;Hominoidea;Hominidae;Homininae;Homo;Homo sapiens	51	3e-19	1	cellular organisms;Bacteria;Proteobacteria;Gammaproteobacteria;Enterobacteriales;Enterobacteriaceae;Klebsiella	48	2e-17	ERR006347.sra.4832119	ERR006347	ERX001127	SRS000639	SRP000547	ERA000138	1000 Genomes CEPH (Utah residents with ancestry from Northern and Western Europe) population sequencing	NA12830	NA12830.22	1000G-mpimg-090515-4	CEU	2009-10-06	5770701	113151	WGS	low coverage	no	ILLUMINA	data/NA12830/sequence_read/ERR006347.filt.fastq.gz	MPIMG	PAIRED	Solexa 1G Genome Analyzer	GENOMIC	184
cellular organisms;Eukaryota;Opisthokonta;Metazoa;Eumetazoa;Bilateria;Coelomata;Deuterostomia;Chordata;Craniata;Vertebrata;Gnathostomata;Teleostomi;Euteleostomi;Sarcopterygii;Tetrapoda;Amniota;Mammalia;Theria;Eutheria;Euarchontoglires;Primates;Haplorrhini;Simiiformes;Catarrhini;Hominoidea;Hominidae;Homininae;Homo;Homo sapiens	51	3e-19	1	cellular organisms;Bacteria;Proteobacteria;Gammaproteobacteria;Xanthomonadales;Xanthomonadaceae;Stenotrophomonas;Stenotrophomonas maltophilia group;Stenotrophomonas maltophilia	51	3e-19	ERR006356.sra.206354	ERR006356	ERX001132	SRS000639	SRP000547	ERA000139	1000 Genomes CEPH (Utah residents with ancestry from Northern and Western Europe) population sequencing	NA12830	NA12830.22	1000G-mpimg-090522-5	CEU	2009-10-15	32761380	642380	WGS	low coverage	no	ILLUMINA	data/NA12830/sequence_read/ERR006356.filt.fastq.gz	MPIMG	PAIRED	Solexa 1G Genome Analyzer	GENOMIC	164
cellular organisms;Eukaryota;Opisthokonta;Metazoa;Eumetazoa;Bilateria;Coelomata;Deuterostomia;Chordata;Craniata;Vertebrata;Gnathostomata;Teleostomi;Euteleostomi;Sarcopterygii;Tetrapoda;Amniota;Mammalia;Theria;Eutheria;Euarchontoglires;Primates;Haplorrhini;Simiiformes;Catarrhini;Hominoidea;Hominidae;Homininae;Homo;Homo sapiens	51	3e-19	1	cellular organisms;Bacteria;Proteobacteria;Gammaproteobacteria;Enterobacteriales;Enterobacteriaceae;Serratia	51	2e-14	ERR006355.sra.889544	ERR006355	ERX001132	SRS000639	SRP000547	ERA000139	1000 Genomes CEPH (Utah residents with ancestry from Northern and Western Europe) population sequencing	NA12830	NA12830.22	1000G-mpimg-090522-4	CEU	2009-10-15	66968202	1313102	WGS	low coverage	no	ILLUMINA	data/NA12830/sequence_read/ERR006355.filt.fastq.gz	MPIMG	PAIRED	Solexa 1G Genome Analyzer	GENOMIC	164
cellular organisms;Eukaryota;Opisthokonta;Metazoa;Eumetazoa;Bilateria;Coelomata;Deuterostomia;Chordata;Craniata;Vertebrata;Gnathostomata;Teleostomi;Euteleostomi;Sarcopterygii;Tetrapoda;Amniota;Mammalia;Theria;Eutheria;Euarchontoglires;Primates;Haplorrhini;Simiiformes;Catarrhini;Hominoidea;Hominidae;Homininae;Homo;Homo sapiens	37	4e-11	1	cellular organisms;Bacteria;Proteobacteria;Betaproteobacteria;Burkholderiales;Comamonadaceae;Acidovorax	37	1e-08	ERR000833.sra.4865322	ERR000833	ERX000066	SRS000033	SRP000031	ERA000024	1000Genomes Project Pilot 1	NA07000	g1k-sc-NA07000-CEU-1	IL4_993_5	CEU	2008-08-12	2041993	55189	WGS	low coverage	no	ILLUMINA	data/NA07000/sequence_read/ERR000833.filt.fastq.gz	SC	PAIRED	Solexa 1G Genome Analyzer	GENOMIC	175
cellular organisms;Eukaryota;Opisthokonta;Metazoa;Eumetazoa;Bilateria;Coelomata;Deuterostomia;Chordata;Craniata;Vertebrata;Gnathostomata;Teleostomi;Euteleostomi;Sarcopterygii;Tetrapoda;Amniota;Mammalia;Theria;Eutheria;Euarchontoglires;Primates;Haplorrhini;Simiiformes;Catarrhini;Hominoidea;Hominidae;Homininae;Homo;Homo sapiens	50	3e-16	1	cellular organisms;Bacteria;Proteobacteria;Gammaproteobacteria;Xanthomonadales;Xanthomonadaceae;Stenotrophomonas;Stenotrophomonas maltophilia group;Stenotrophomonas maltophilia;Stenotrophomonas maltophilia K279a	51	3e-19	ERR006345.sra.2930098	ERR006345	ERX001127	SRS000639	SRP000547	ERA000138	1000 Genomes CEPH (Utah residents with ancestry from Northern and Western Europe) population sequencing	NA12830	NA12830.22	1000G-mpimg-090515-1	CEU	2009-10-06	20819118	408218	WGS	low coverage	no	ILLUMINA	data/NA12830/sequence_read/ERR006345.filt.fastq.gz	MPIMG	PAIRED	Solexa 1G Genome Analyzer	GENOMIC	184
cellular organisms;Eukaryota;Opisthokonta;Metazoa;Eumetazoa;Bilateria;Coelomata;Deuterostomia;Chordata;Craniata;Vertebrata;Gnathostomata;Teleostomi;Euteleostomi;Sarcopterygii;Tetrapoda;Amniota;Mammalia;Theria;Eutheria;Euarchontoglires;Primates;Haplorrhini;Simiiformes;Catarrhini;Hominoidea;Hominidae;Homininae;Homo;Homo sapiens	51	3e-19	1	cellular organisms;Bacteria;Proteobacteria;Gammaproteobacteria;Xanthomonadales;Xanthomonadaceae	51	2e-14	ERR006366.sra.2815286	ERR006366	ERX001138	SRS000639	SRP000547	ERA000141	1000 Genomes CEPH (Utah residents with ancestry from Northern and Western Europe) population sequencing	NA12830	NA12830.22	1000G-mpimg-090608-1	CEU	2009-10-06	58676877	1150527	WGS	low coverage	no	ILLUMINA	data/NA12830/sequence_read/ERR006366.filt.fastq.gz	MPIMG	PAIRED	Solexa 1G Genome Analyzer	GENOMIC	145
cellular organisms;Eukaryota;Opisthokonta;Metazoa;Eumetazoa;Bilateria;Coelomata;Deuterostomia;Chordata;Craniata;Vertebrata;Gnathostomata;Teleostomi;Euteleostomi;Sarcopterygii;Tetrapoda;Amniota;Mammalia;Theria;Eutheria;Euarchontoglires;Primates;Haplorrhini;Simiiformes;Catarrhini;Hominoidea;Hominidae;Homininae;Homo;Homo sapiens	51	3e-19	1	cellular organisms;Bacteria;Proteobacteria	51	3e-19	ERR006347.sra.1605929	ERR006347	ERX001127	SRS000639	SRP000547	ERA000138	1000 Genomes CEPH (Utah residents with ancestry from Northern and Western Europe) population sequencing	NA12830	NA12830.22	1000G-mpimg-090515-4	CEU	2009-10-06	5770701	113151	WGS	low coverage	no	ILLUMINA	data/NA12830/sequence_read/ERR006347.filt.fastq.gz	MPIMG	PAIRED	Solexa 1G Genome Analyzer	GENOMIC	184
cellular organisms;Eukaryota;Opisthokonta;Metazoa;Eumetazoa;Bilateria;Coelomata;Deuterostomia;Chordata;Craniata;Vertebrata;Gnathostomata;Teleostomi;Euteleostomi;Sarcopterygii;Tetrapoda;Amniota;Mammalia;Theria;Eutheria;Euarchontoglires;Primates;Haplorrhini;Simiiformes;Catarrhini;Hominoidea;Hominidae;Homininae;Homo;Homo sapiens	51	3e-19	1	cellular organisms;Bacteria;Proteobacteria;Betaproteobacteria;Burkholderiales;Comamonadaceae;Acidovorax;Acidovorax ebreus;Acidovorax ebreus TPSY	51	3e-19	ERR006395.sra.23000511	ERR006395	ERX001149	SRS000640	SRP000547	ERA000145	1000 Genomes CEPH (Utah residents with ancestry from Northern and Western Europe) population sequencing	NA12842	NA12842.23	1000G-mpimg-090703-5	CEU	2009-10-06	117298674	2299974	WGS	low coverage	no	ILLUMINA	data/NA12842/sequence_read/ERR006395.filt.fastq.gz	MPIMG	PAIRED	Solexa 1G Genome Analyzer	GENOMIC	169
cellular organisms;Eukaryota;Opisthokonta;Metazoa;Eumetazoa;Bilateria;Coelomata;Deuterostomia;Chordata;Craniata;Vertebrata;Gnathostomata;Teleostomi;Euteleostomi;Sarcopterygii;Tetrapoda;Amniota;Mammalia;Theria;Eutheria;Euarchontoglires;Primates;Haplorrhini;Simiiformes;Catarrhini	50	1e-18	1	cellular organisms;Bacteria;Proteobacteria;Gammaproteobacteria;Enterobacteriales;Enterobacteriaceae	46	8e-14	ERR006355.sra.12888320	ERR006355	ERX001132	SRS000639	SRP000547	ERA000139	1000 Genomes CEPH (Utah residents with ancestry from Northern and Western Europe) population sequencing	NA12830	NA12830.22	1000G-mpimg-090522-4	CEU	2009-10-15	66968202	1313102	WGS	low coverage	no	ILLUMINA	data/NA12830/sequence_read/ERR006355.filt.fastq.gz	MPIMG	PAIRED	Solexa 1G Genome Analyzer	GENOMIC	164
cellular organisms;Eukaryota;Opisthokonta;Metazoa;Eumetazoa;Bilateria;Coelomata;Deuterostomia;Chordata;Craniata;Vertebrata;Gnathostomata;Teleostomi;Euteleostomi;Sarcopterygii;Tetrapoda;Amniota;Mammalia;Theria;Eutheria;Euarchontoglires;Primates;Haplorrhini;Simiiformes;Catarrhini;Hominoidea;Hominidae;Homininae;Homo;Homo sapiens	51	3e-19	1	cellular organisms;Bacteria;Proteobacteria;Gammaproteobacteria;Pseudomonadales;Pseudomonadaceae;Pseudomonas;Pseudomonas stutzeri group;Pseudomonas stutzeri subgroup;Pseudomonas stutzeri	51	2e-14	ERR006356.sra.2298203	ERR006356	ERX001132	SRS000639	SRP000547	ERA000139	1000 Genomes CEPH (Utah residents with ancestry from Northern and Western Europe) population sequencing	NA12830	NA12830.22	1000G-mpimg-090522-5	CEU	2009-10-15	32761380	642380	WGS	low coverage	no	ILLUMINA	data/NA12830/sequence_read/ERR006356.filt.fastq.gz	MPIMG	PAIRED	Solexa 1G Genome Analyzer	GENOMIC	164
cellular organisms;Eukaryota;Opisthokonta;Metazoa;Eumetazoa;Bilateria;Coelomata;Deuterostomia;Chordata;Craniata;Vertebrata;Gnathostomata;Teleostomi;Euteleostomi;Sarcopterygii;Tetrapoda;Amniota;Mammalia;Theria;Eutheria;Euarchontoglires;Primates;Haplorrhini;Simiiformes;Catarrhini;Hominoidea;Hominidae;Homininae;Homo;Homo sapiens	51	3e-19	1	cellular organisms;Bacteria;Proteobacteria;Gammaproteobacteria;Enterobacteriales;Enterobacteriaceae;Serratia	50	3e-16	ERR006347.sra.1995865	ERR006347	ERX001127	SRS000639	SRP000547	ERA000138	1000 Genomes CEPH (Utah residents with ancestry from Northern and Western Europe) population sequencing	NA12830	NA12830.22	1000G-mpimg-090515-4	CEU	2009-10-06	5770701	113151	WGS	low coverage	no	ILLUMINA	data/NA12830/sequence_read/ERR006347.filt.fastq.gz	MPIMG	PAIRED	Solexa 1G Genome Analyzer	GENOMIC	184
cellular organisms;Eukaryota;Opisthokonta;Metazoa;Eumetazoa;Bilateria;Coelomata;Deuterostomia;Chordata;Craniata;Vertebrata;Gnathostomata;Teleostomi;Euteleostomi;Sarcopterygii;Tetrapoda;Amniota;Mammalia;Theria;Eutheria;Euarchontoglires;Primates;Haplorrhini;Simiiformes	51	3e-19	1	cellular organisms;Bacteria;Proteobacteria;Gammaproteobacteria;Xanthomonadales;Xanthomonadaceae;Stenotrophomonas;Stenotrophomonas maltophilia group;Stenotrophomonas maltophilia;Stenotrophomonas maltophilia D457	49	1e-15	ERR006345.sra.4453930	ERR006345	ERX001127	SRS000639	SRP000547	ERA000138	1000 Genomes CEPH (Utah residents with ancestry from Northern and Western Europe) population sequencing	NA12830	NA12830.22	1000G-mpimg-090515-1	CEU	2009-10-06	20819118	408218	WGS	low coverage	no	ILLUMINA	data/NA12830/sequence_read/ERR006345.filt.fastq.gz	MPIMG	PAIRED	Solexa 1G Genome Analyzer	GENOMIC	184
cellular organisms;Eukaryota;Opisthokonta;Metazoa;Eumetazoa;Bilateria;Coelomata;Deuterostomia;Chordata;Craniata;Vertebrata;Gnathostomata;Teleostomi;Euteleostomi;Sarcopterygii;Tetrapoda;Amniota;Mammalia;Theria;Eutheria;Euarchontoglires;Primates;Haplorrhini;Simiiformes;Catarrhini;Hominoidea;Hominidae	51	3e-19	1	cellular organisms;Bacteria;Actinobacteria;Actinobacteria;Actinobacteridae;Actinomycetales;Propionibacterineae;Propionibacteriaceae;Propionibacterium;Propionibacterium acnes	45	1e-15	ERR006345.sra.8871420	ERR006345	ERX001127	SRS000639	SRP000547	ERA000138	1000 Genomes CEPH (Utah residents with ancestry from Northern and Western Europe) population sequencing	NA12830	NA12830.22	1000G-mpimg-090515-1	CEU	2009-10-06	20819118	408218	WGS	low coverage	no	ILLUMINA	data/NA12830/sequence_read/ERR006345.filt.fastq.gz	MPIMG	PAIRED	Solexa 1G Genome Analyzer	GENOMIC	184
cellular organisms;Eukaryota;Opisthokonta;Metazoa;Eumetazoa;Bilateria;Coelomata;Deuterostomia;Chordata;Craniata;Vertebrata;Gnathostomata;Teleostomi;Euteleostomi;Sarcopterygii;Tetrapoda;Amniota;Mammalia;Theria;Eutheria;Euarchontoglires;Primates;Haplorrhini;Simiiformes;Catarrhini;Hominoidea;Hominidae;Homininae;Homo;Homo sapiens	51	8e-17	2	cellular organisms;Bacteria;Proteobacteria;Gammaproteobacteria;Enterobacteriales;Enterobacteriaceae;Serratia	51	8e-17	ERR006347.sra.11975661	ERR006347	ERX001127	SRS000639	SRP000547	ERA000138	1000 Genomes CEPH (Utah residents with ancestry from Northern and Western Europe) population sequencing	NA12830	NA12830.22	1000G-mpimg-090515-4	CEU	2009-10-06	5770701	113151	WGS	low coverage	no	ILLUMINA	data/NA12830/sequence_read/ERR006347.filt.fastq.gz	MPIMG	PAIRED	Solexa 1G Genome Analyzer	GENOMIC	184
cellular organisms;Eukaryota;Opisthokonta;Metazoa;Eumetazoa;Bilateria;Coelomata;Deuterostomia;Chordata;Craniata;Vertebrata;Gnathostomata;Teleostomi;Euteleostomi;Sarcopterygii;Tetrapoda;Amniota;Mammalia;Theria;Eutheria;Euarchontoglires;Primates;Haplorrhini;Simiiformes;Catarrhini;Hominoidea;Hominidae;Homininae;Homo;Homo sapiens	51	2e-14	1	cellular organisms;Bacteria;Actinobacteria;Actinobacteria;Actinobacteridae;Actinomycetales;Propionibacterineae;Propionibacteriaceae;Propionibacterium;Propionibacterium acnes	50	8e-14	ERR006347.sra.8227604	ERR006347	ERX001127	SRS000639	SRP000547	ERA000138	1000 Genomes CEPH (Utah residents with ancestry from Northern and Western Europe) population sequencing	NA12830	NA12830.22	1000G-mpimg-090515-4	CEU	2009-10-06	5770701	113151	WGS	low coverage	no	ILLUMINA	data/NA12830/sequence_read/ERR006347.filt.fastq.gz	MPIMG	PAIRED	Solexa 1G Genome Analyzer	GENOMIC	184
cellular organisms;Eukaryota;Opisthokonta;Metazoa;Eumetazoa;Bilateria;Coelomata;Deuterostomia;Chordata;Craniata;Vertebrata;Gnathostomata;Teleostomi;Euteleostomi;Sarcopterygii;Tetrapoda;Amniota;Mammalia;Theria;Eutheria;Euarchontoglires;Primates;Haplorrhini;Simiiformes;Catarrhini;Hominoidea;Hominidae;Homininae;Homo;Homo sapiens	51	3e-19	3	cellular organisms;Bacteria;Proteobacteria;Gammaproteobacteria;Xanthomonadales;Xanthomonadaceae;Stenotrophomonas;Stenotrophomonas maltophilia group;Stenotrophomonas maltophilia;Stenotrophomonas maltophilia K279a	48	2e-17	ERR006355.sra.7917142	ERR006355	ERX001132	SRS000639	SRP000547	ERA000139	1000 Genomes CEPH (Utah residents with ancestry from Northern and Western Europe) population sequencing	NA12830	NA12830.22	1000G-mpimg-090522-4	CEU	2009-10-15	66968202	1313102	WGS	low coverage	no	ILLUMINA	data/NA12830/sequence_read/ERR006355.filt.fastq.gz	MPIMG	PAIRED	Solexa 1G Genome Analyzer	GENOMIC	164
cellular organisms;Eukaryota;Opisthokonta;Metazoa;Eumetazoa;Bilateria;Coelomata;Deuterostomia;Chordata;Craniata;Vertebrata;Gnathostomata;Teleostomi;Euteleostomi;Sarcopterygii;Tetrapoda;Amniota;Mammalia;Theria;Eutheria;Euarchontoglires;Primates;Haplorrhini;Simiiformes	51	3e-19	1	cellular organisms;Bacteria;Proteobacteria;Gammaproteobacteria;Xanthomonadales;Xanthomonadaceae;Stenotrophomonas;Stenotrophomonas maltophilia group;Stenotrophomonas maltophilia;Stenotrophomonas maltophilia JV3	51	8e-17	ERR006354.sra.15108168	ERR006354	ERX001132	SRS000639	SRP000547	ERA000139	1000 Genomes CEPH (Utah residents with ancestry from Northern and Western Europe) population sequencing	NA12830	NA12830.22	1000G-mpimg-090522-3	CEU	2009-10-15	41581728	815328	WGS	low coverage	no	ILLUMINA	data/NA12830/sequence_read/ERR006354.filt.fastq.gz	MPIMG	PAIRED	Solexa 1G Genome Analyzer	GENOMIC	164
cellular organisms;Eukaryota;Opisthokonta;Metazoa;Eumetazoa;Bilateria;Coelomata;Deuterostomia;Chordata;Craniata;Vertebrata;Gnathostomata;Teleostomi;Euteleostomi;Sarcopterygii;Tetrapoda;Amniota;Mammalia;Theria;Eutheria;Euarchontoglires;Primates;Haplorrhini;Simiiformes;Catarrhini;Hominoidea;Hominidae;Homininae;Homo;Homo sapiens	51	3e-19	1	cellular organisms;Bacteria;Proteobacteria;Gammaproteobacteria;Xanthomonadales;Xanthomonadaceae;Stenotrophomonas;Stenotrophomonas maltophilia group;Stenotrophomonas maltophilia;Stenotrophomonas maltophilia JV3	50	3e-16	ERR006346.sra.8167463	ERR006346	ERX001127	SRS000639	SRP000547	ERA000138	1000 Genomes CEPH (Utah residents with ancestry from Northern and Western Europe) population sequencing	NA12830	NA12830.22	1000G-mpimg-090515-2	CEU	2009-10-06	10555929	206979	WGS	low coverage	no	ILLUMINA	data/NA12830/sequence_read/ERR006346.filt.fastq.gz	MPIMG	PAIRED	Solexa 1G Genome Analyzer	GENOMIC	184
cellular organisms;Eukaryota;Opisthokonta;Metazoa;Eumetazoa;Bilateria;Coelomata;Deuterostomia;Chordata;Craniata;Vertebrata;Gnathostomata;Teleostomi;Euteleostomi;Sarcopterygii;Tetrapoda;Amniota;Mammalia;Theria;Eutheria;Euarchontoglires;Primates;Haplorrhini;Simiiformes;Catarrhini;Hominoidea;Hominidae	51	3e-19	1	cellular organisms;Bacteria;Proteobacteria;Gammaproteobacteria;Xanthomonadales;Xanthomonadaceae;Stenotrophomonas;Stenotrophomonas maltophilia group;Stenotrophomonas maltophilia	47	8e-17	ERR006345.sra.8260419	ERR006345	ERX001127	SRS000639	SRP000547	ERA000138	1000 Genomes CEPH (Utah residents with ancestry from Northern and Western Europe) population sequencing	NA12830	NA12830.22	1000G-mpimg-090515-1	CEU	2009-10-06	20819118	408218	WGS	low coverage	no	ILLUMINA	data/NA12830/sequence_read/ERR006345.filt.fastq.gz	MPIMG	PAIRED	Solexa 1G Genome Analyzer	GENOMIC	184
cellular organisms;Eukaryota;Opisthokonta;Metazoa;Eumetazoa;Bilateria;Coelomata;Deuterostomia;Chordata;Craniata;Vertebrata;Gnathostomata;Teleostomi;Euteleostomi;Sarcopterygii;Tetrapoda;Amniota;Mammalia;Theria;Eutheria;Euarchontoglires;Primates;Haplorrhini;Simiiformes;Catarrhini;Hominoidea;Hominidae;Homininae;Homo;Homo sapiens	51	1e-06	1	cellular organisms;Bacteria;Proteobacteria;Gammaproteobacteria;Xanthomonadales;Xanthomonadaceae;Stenotrophomonas;Stenotrophomonas maltophilia group;Stenotrophomonas maltophilia	51	3e-19	ERR006395.sra.3793854	ERR006395	ERX001149	SRS000640	SRP000547	ERA000145	1000 Genomes CEPH (Utah residents with ancestry from Northern and Western Europe) population sequencing	NA12842	NA12842.23	1000G-mpimg-090703-5	CEU	2009-10-06	117298674	2299974	WGS	low coverage	no	ILLUMINA	data/NA12842/sequence_read/ERR006395.filt.fastq.gz	MPIMG	PAIRED	Solexa 1G Genome Analyzer	GENOMIC	169
cellular organisms;Eukaryota;Opisthokonta;Metazoa;Eumetazoa;Bilateria;Coelomata;Deuterostomia;Chordata;Craniata;Vertebrata;Gnathostomata;Teleostomi;Euteleostomi;Sarcopterygii;Tetrapoda;Amniota;Mammalia;Theria;Eutheria;Euarchontoglires;Primates;Haplorrhini;Simiiformes;Catarrhini;Hominoidea;Hominidae;Homininae;Homo;Homo sapiens	49	1e-15	3	cellular organisms;Bacteria;Actinobacteria;Actinobacteria;Actinobacteridae;Actinomycetales;Propionibacterineae;Propionibacteriaceae;Propionibacterium;Propionibacterium acnes	51	3e-19	ERR006390.sra.673992	ERR006390	ERX001146	SRS000640	SRP000547	ERA000144	1000 Genomes CEPH (Utah residents with ancestry from Northern and Western Europe) population sequencing	NA12842	NA12842.23	1000G-mpimg-090625-8	CEU	2009-10-06	100035786	1961486	WGS	low coverage	no	ILLUMINA	data/NA12842/sequence_read/ERR006390.filt.fastq.gz	MPIMG	PAIRED	Solexa 1G Genome Analyzer	GENOMIC	171
cellular organisms;Eukaryota;Opisthokonta;Metazoa;Eumetazoa;Bilateria;Coelomata;Deuterostomia;Chordata;Craniata;Vertebrata;Gnathostomata;Teleostomi;Euteleostomi;Sarcopterygii;Tetrapoda;Amniota;Mammalia;Theria;Eutheria;Euarchontoglires;Primates;Haplorrhini;Simiiformes;Catarrhini;Hominoidea	39	5e-12	1	cellular organisms;Bacteria;Proteobacteria;Gammaproteobacteria;Xanthomonadales;Xanthomonadaceae;Stenotrophomonas;Stenotrophomonas maltophilia group;Stenotrophomonas maltophilia;Stenotrophomonas maltophilia K279a	51	3e-19	ERR006347.sra.1188505	ERR006347	ERX001127	SRS000639	SRP000547	ERA000138	1000 Genomes CEPH (Utah residents with ancestry from Northern and Western Europe) population sequencing	NA12830	NA12830.22	1000G-mpimg-090515-4	CEU	2009-10-06	5770701	113151	WGS	low coverage	no	ILLUMINA	data/NA12830/sequence_read/ERR006347.filt.fastq.gz	MPIMG	PAIRED	Solexa 1G Genome Analyzer	GENOMIC	184
cellular organisms;Eukaryota;Opisthokonta;Metazoa;Eumetazoa;Bilateria;Coelomata;Deuterostomia;Chordata;Craniata;Vertebrata;Gnathostomata	36	2e-10	1	cellular organisms;Bacteria;Thermotogae;Thermotogae;Thermotogales;Thermotogaceae;Thermosipho	35	1e-07	ERR006268.sra.10255918	ERR006268	ERX001097	SRS000643	SRP000547	ERA000127	1000 Genomes CEPH (Utah residents with ancestry from Northern and Western Europe) population sequencing	NA12890	NA12890.26	1000G-mpimg-090224-4	CEU	2009-10-06	18488772	513577	WGS	low coverage	no	ILLUMINA	data/NA12890/sequence_read/ERR006268.filt.fastq.gz	MPIMG	PAIRED	Solexa 1G Genome Analyzer	GENOMIC	193
cellular organisms;Eukaryota;Opisthokonta;Metazoa;Eumetazoa;Bilateria;Coelomata;Deuterostomia;Chordata;Craniata;Vertebrata;Gnathostomata;Teleostomi;Euteleostomi;Sarcopterygii;Tetrapoda;Amniota;Mammalia;Theria;Eutheria;Euarchontoglires;Primates;Haplorrhini;Simiiformes;Catarrhini;Hominoidea;Hominidae;Homininae;Homo;Homo sapiens	36	2e-10	1	cellular organisms;Bacteria;Firmicutes;Bacilli;Bacillales;Bacillaceae;Geobacillus;Geobacillus sp. WCH70	32	9e-06	ERR000670.sra.239400	ERR000670	ERX000167	SRS000061	SRP000031	ERA000024	1000Genomes Project Pilot 1	NA12044	g1k-sc-NA12044-CEU-1	IL6_903_6	CEU	2008-08-12	688932	19137	WGS	low coverage	no	ILLUMINA	data/NA12044/sequence_read/ERR000670.filt.fastq.gz	SC	PAIRED	Solexa 1G Genome Analyzer	GENOMIC	175
cellular organisms;Eukaryota;Opisthokonta;Metazoa;Eumetazoa;Bilateria;Coelomata;Deuterostomia;Chordata;Craniata;Vertebrata;Gnathostomata;Teleostomi;Euteleostomi;Sarcopterygii;Tetrapoda;Amniota;Mammalia;Theria;Eutheria;Euarchontoglires;Primates;Haplorrhini;Simiiformes;Catarrhini;Hominoidea;Hominidae;Homininae;Homo;Homo sapiens	51	8e-17	1	cellular organisms;Bacteria;Proteobacteria;Gammaproteobacteria;Xanthomonadales;Xanthomonadaceae;Stenotrophomonas;Stenotrophomonas maltophilia group;Stenotrophomonas maltophilia;Stenotrophomonas maltophilia R551-3	49	3e-13	ERR006347.sra.11549803	ERR006347	ERX001127	SRS000639	SRP000547	ERA000138	1000 Genomes CEPH (Utah residents with ancestry from Northern and Western Europe) population sequencing	NA12830	NA12830.22	1000G-mpimg-090515-4	CEU	2009-10-06	5770701	113151	WGS	low coverage	no	ILLUMINA	data/NA12830/sequence_read/ERR006347.filt.fastq.gz	MPIMG	PAIRED	Solexa 1G Genome Analyzer	GENOMIC	184
cellular organisms;Eukaryota;Opisthokonta;Metazoa;Eumetazoa;Bilateria;Coelomata;Deuterostomia;Chordata;Craniata;Vertebrata;Gnathostomata;Teleostomi;Euteleostomi;Sarcopterygii;Tetrapoda;Amniota;Mammalia;Theria;Eutheria;Euarchontoglires;Primates;Haplorrhini;Simiiformes;Catarrhini;Hominoidea;Hominidae;Homininae;Homo;Homo sapiens	51	3e-19	1	cellular organisms;Bacteria;Proteobacteria;Gammaproteobacteria;Enterobacteriales;Enterobacteriaceae;Cronobacter;Cronobacter sakazakii	51	5e-12	ERR006347.sra.630997	ERR006347	ERX001127	SRS000639	SRP000547	ERA000138	1000 Genomes CEPH (Utah residents with ancestry from Northern and Western Europe) population sequencing	NA12830	NA12830.22	1000G-mpimg-090515-4	CEU	2009-10-06	5770701	113151	WGS	low coverage	no	ILLUMINA	data/NA12830/sequence_read/ERR006347.filt.fastq.gz	MPIMG	PAIRED	Solexa 1G Genome Analyzer	GENOMIC	184
cellular organisms;Eukaryota;Opisthokonta;Metazoa;Eumetazoa;Bilateria;Coelomata;Deuterostomia;Chordata;Craniata;Vertebrata;Gnathostomata;Teleostomi;Euteleostomi;Sarcopterygii;Tetrapoda;Amniota;Mammalia;Theria;Eutheria;Euarchontoglires;Primates;Haplorrhini;Simiiformes;Catarrhini;Hominoidea;Hominidae;Homininae;Homo;Homo sapiens	51	3e-19	1	cellular organisms;Bacteria;Proteobacteria;Gammaproteobacteria;Xanthomonadales;Xanthomonadaceae;Stenotrophomonas;Stenotrophomonas maltophilia group;Stenotrophomonas maltophilia;Stenotrophomonas maltophilia R551-3	45	3e-13	ERR006347.sra.3348952	ERR006347	ERX001127	SRS000639	SRP000547	ERA000138	1000 Genomes CEPH (Utah residents with ancestry from Northern and Western Europe) population sequencing	NA12830	NA12830.22	1000G-mpimg-090515-4	CEU	2009-10-06	5770701	113151	WGS	low coverage	no	ILLUMINA	data/NA12830/sequence_read/ERR006347.filt.fastq.gz	MPIMG	PAIRED	Solexa 1G Genome Analyzer	GENOMIC	184
cellular organisms;Eukaryota;Opisthokonta;Metazoa;Eumetazoa;Bilateria;Coelomata;Deuterostomia;Chordata;Craniata;Vertebrata;Gnathostomata;Teleostomi;Euteleostomi;Sarcopterygii;Tetrapoda;Amniota;Mammalia;Theria;Eutheria;Euarchontoglires;Primates;Haplorrhini;Simiiformes;Catarrhini;Hominoidea;Hominidae;Homininae;Homo;Homo sapiens	51	3e-19	1	cellular organisms;Bacteria;Proteobacteria;Alphaproteobacteria;Rhizobiales;Methylobacteriaceae;Methylobacterium;Methylobacterium radiotolerans;Methylobacterium radiotolerans JCM 2831	47	8e-17	ERR006409.sra.17812879	ERR006409	ERX001153	SRS000640	SRP000547	ERA000147	1000 Genomes CEPH (Utah residents with ancestry from Northern and Western Europe) population sequencing	NA12842	NA12842.23	1000G-mpimg-090714-8	CEU	2009-10-07	52401378	1027478	WGS	low coverage	no	ILLUMINA	data/NA12842/sequence_read/ERR006409.filt.fastq.gz	MPIMG	PAIRED	Solexa 1G Genome Analyzer	GENOMIC	178
cellular organisms;Eukaryota;Opisthokonta;Metazoa;Eumetazoa;Bilateria;Coelomata;Deuterostomia;Chordata;Craniata;Vertebrata;Gnathostomata;Teleostomi;Euteleostomi;Sarcopterygii;Tetrapoda;Amniota;Mammalia;Theria;Eutheria;Euarchontoglires;Primates;Haplorrhini;Simiiformes;Catarrhini;Hominoidea;Hominidae;Homininae;Homo;Homo sapiens	51	3e-19	1	cellular organisms;Bacteria;Proteobacteria;Gammaproteobacteria;Xanthomonadales;Xanthomonadaceae;Stenotrophomonas;Stenotrophomonas maltophilia group;Stenotrophomonas maltophilia	51	8e-17	ERR006346.sra.496992	ERR006346	ERX001127	SRS000639	SRP000547	ERA000138	1000 Genomes CEPH (Utah residents with ancestry from Northern and Western Europe) population sequencing	NA12830	NA12830.22	1000G-mpimg-090515-2	CEU	2009-10-06	10555929	206979	WGS	low coverage	no	ILLUMINA	data/NA12830/sequence_read/ERR006346.filt.fastq.gz	MPIMG	PAIRED	Solexa 1G Genome Analyzer	GENOMIC	184
cellular organisms;Eukaryota;Opisthokonta;Metazoa;Eumetazoa;Bilateria;Coelomata;Deuterostomia;Chordata;Craniata;Vertebrata;Gnathostomata;Teleostomi;Euteleostomi;Sarcopterygii;Tetrapoda;Amniota;Mammalia;Theria;Eutheria;Euarchontoglires;Primates;Haplorrhini;Simiiformes;Catarrhini;Hominoidea;Hominidae;Homininae;Homo;Homo sapiens	49	5e-18	2	cellular organisms;Bacteria	51	3e-19	ERR006345.sra.605868	ERR006345	ERX001127	SRS000639	SRP000547	ERA000138	1000 Genomes CEPH (Utah residents with ancestry from Northern and Western Europe) population sequencing	NA12830	NA12830.22	1000G-mpimg-090515-1	CEU	2009-10-06	20819118	408218	WGS	low coverage	no	ILLUMINA	data/NA12830/sequence_read/ERR006345.filt.fastq.gz	MPIMG	PAIRED	Solexa 1G Genome Analyzer	GENOMIC	184
[truncated: 6,739 more rows]
